# Supplementary material for: H-NS Facilitates Sequence Diversification of Horizontally Transferred DNAs during Their Integration in Host Chromosomes
Source: PubMed Central journal article supplement (PMC4720273; doi:10.1371/journal.pgen.1005796), 2016-01-20

H-NS binding profiles in *Escherichia coli* SE11  
(1st experiment and 2nd experiment)

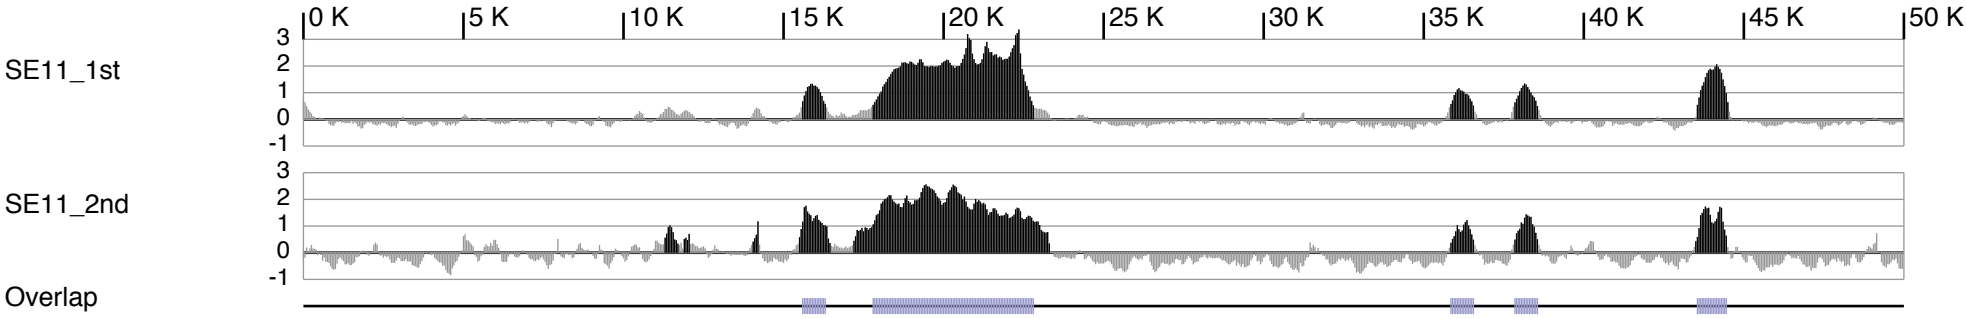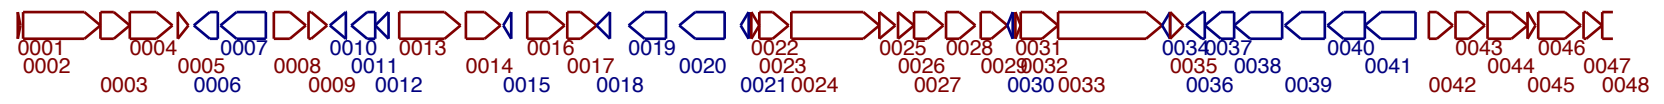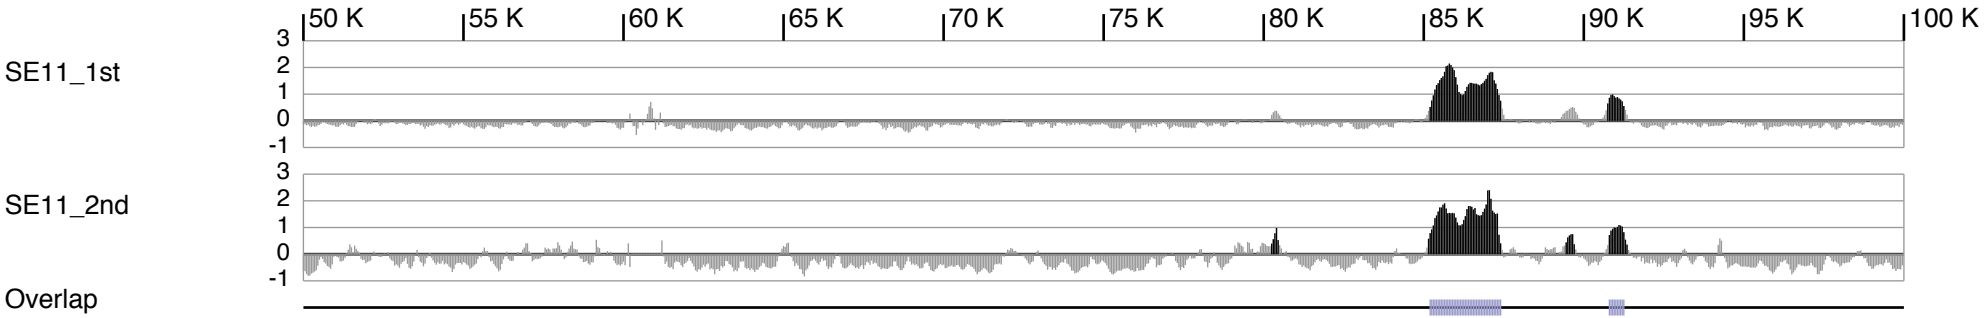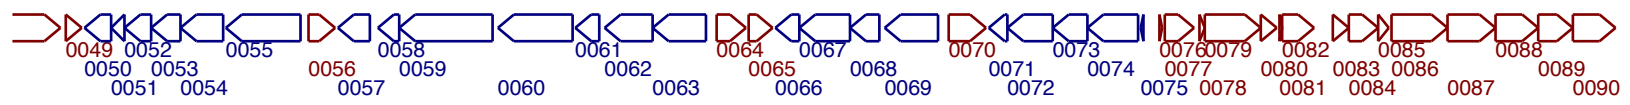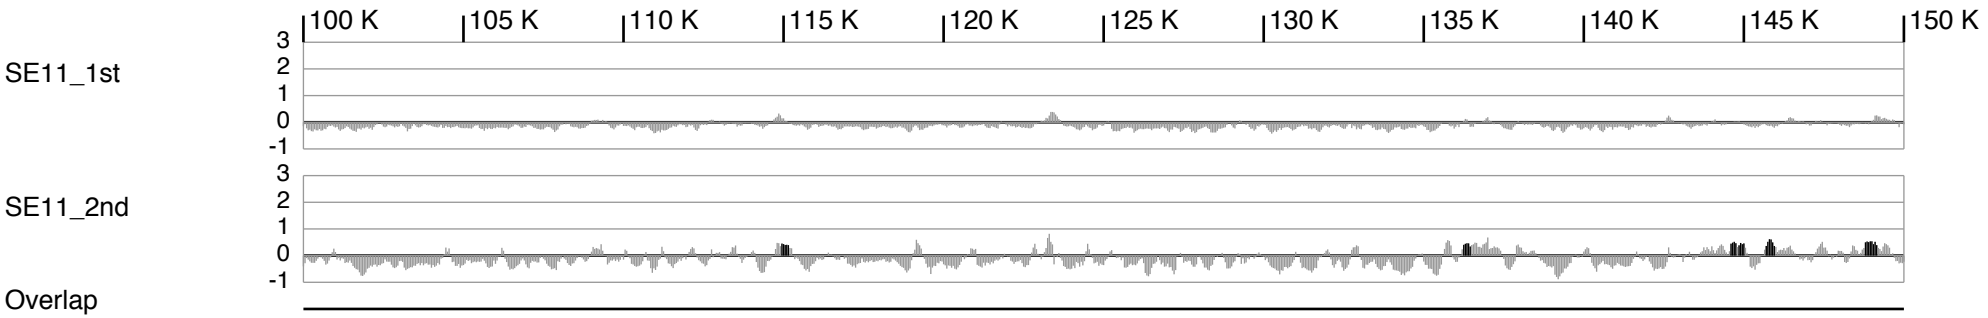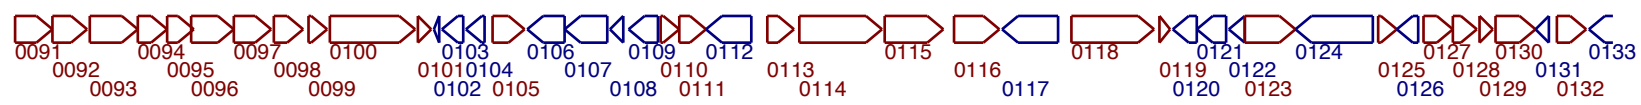

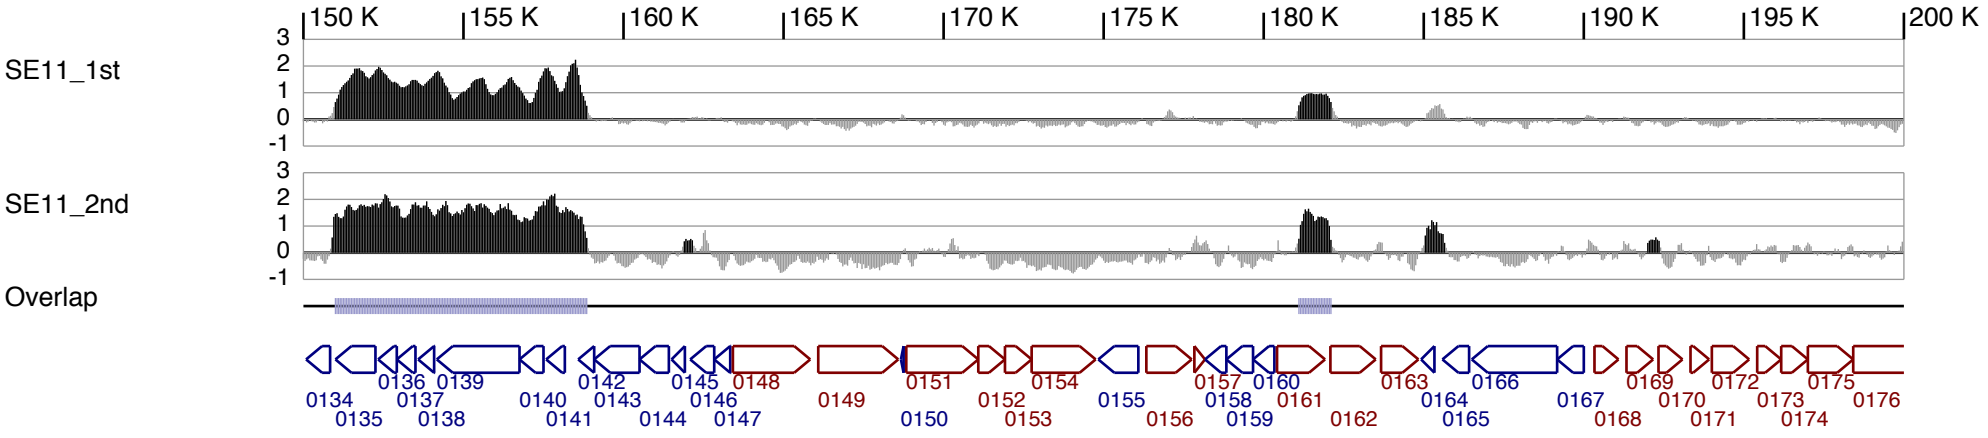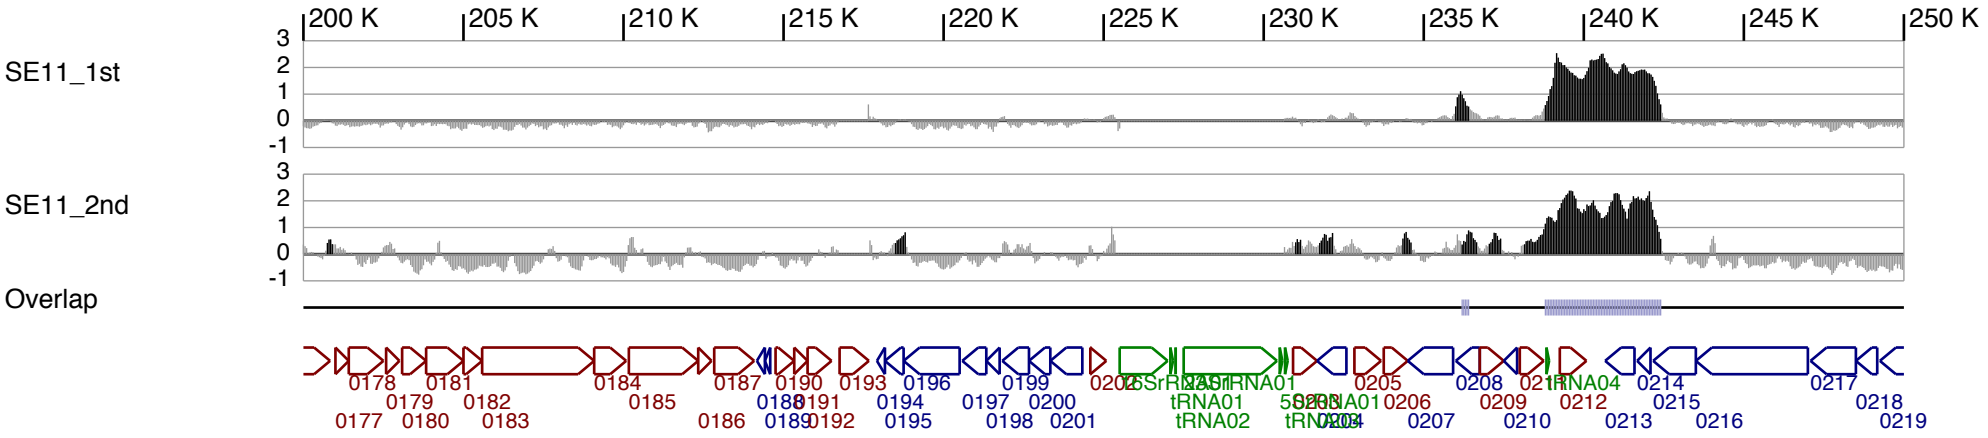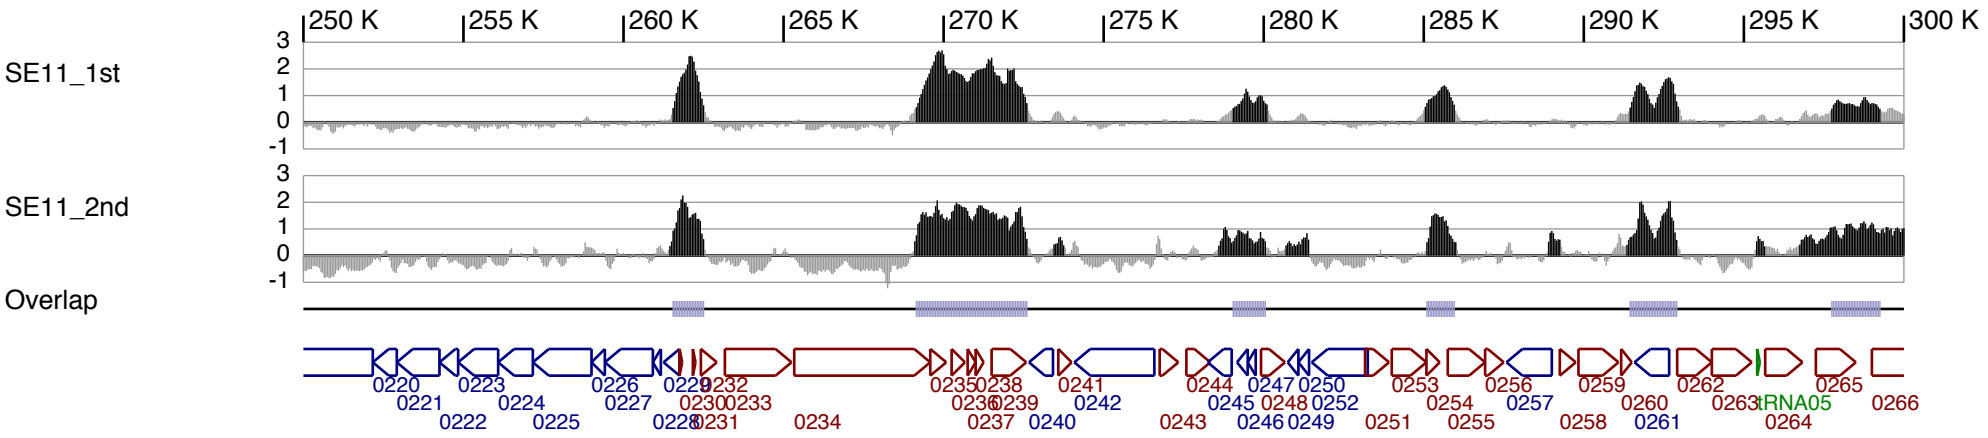

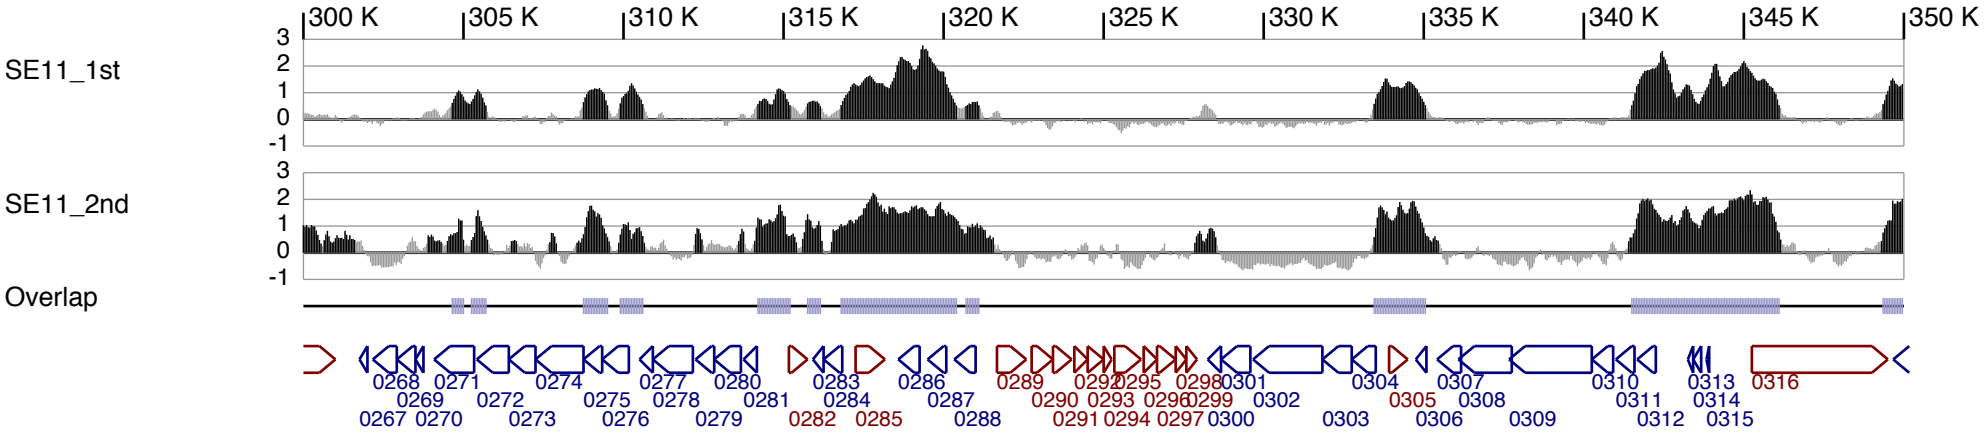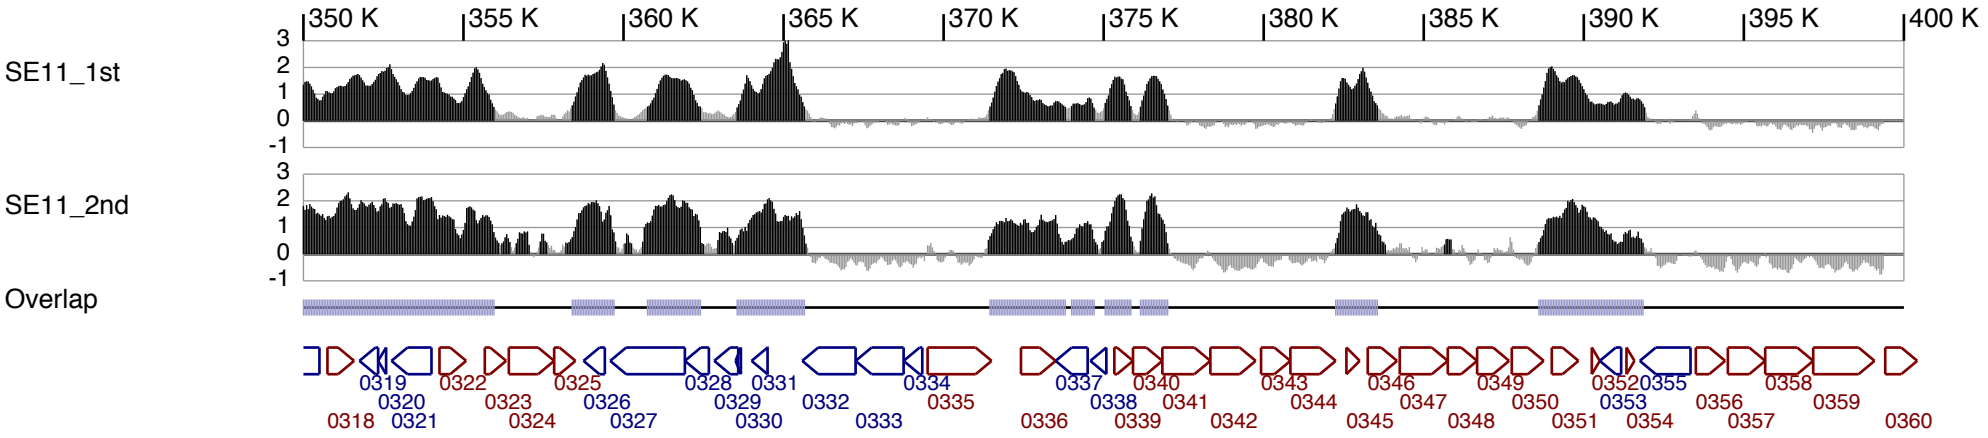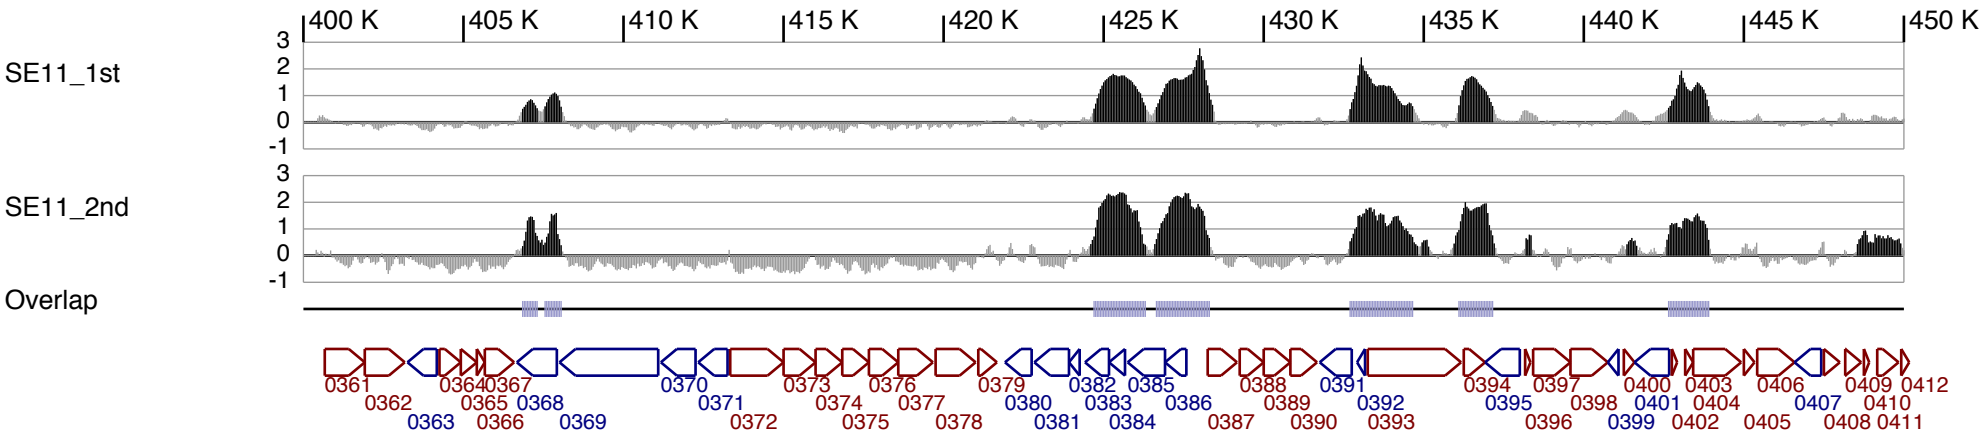

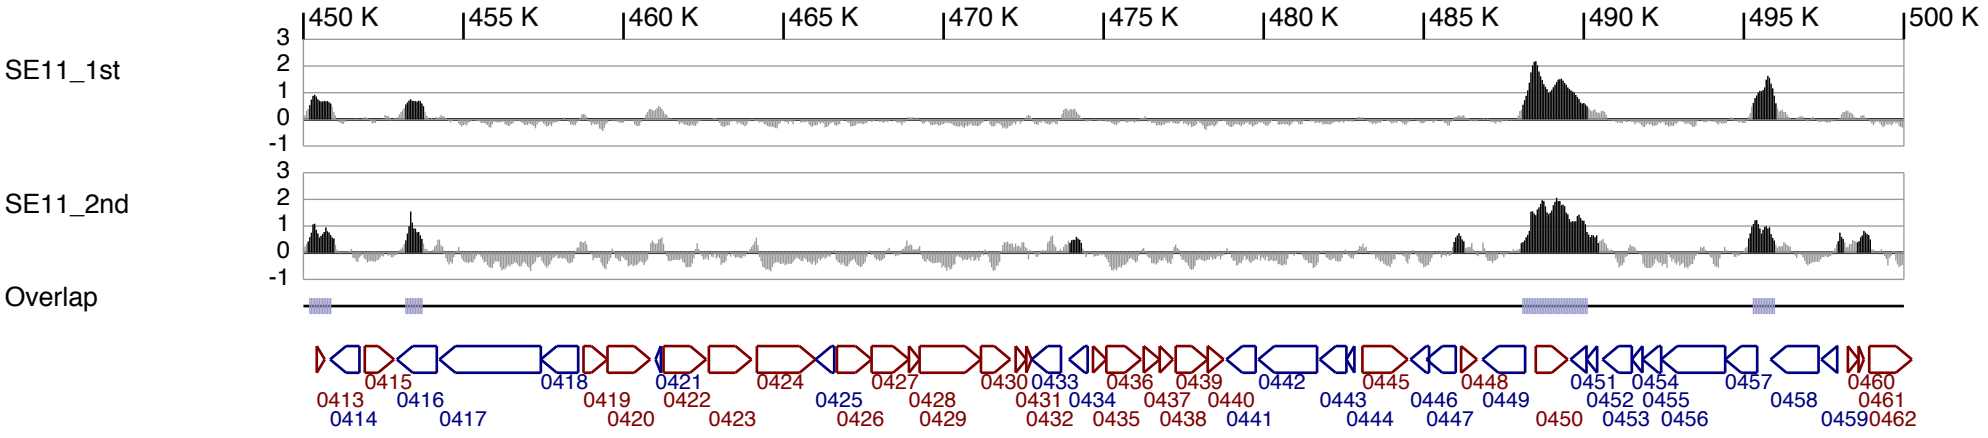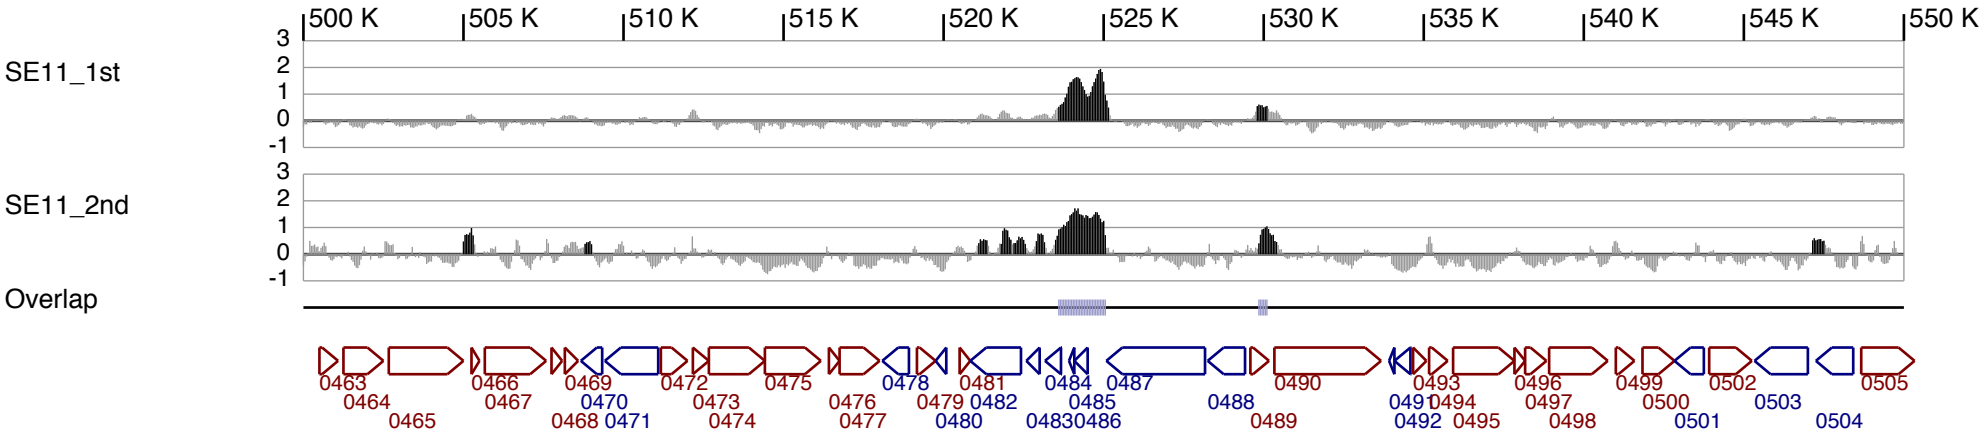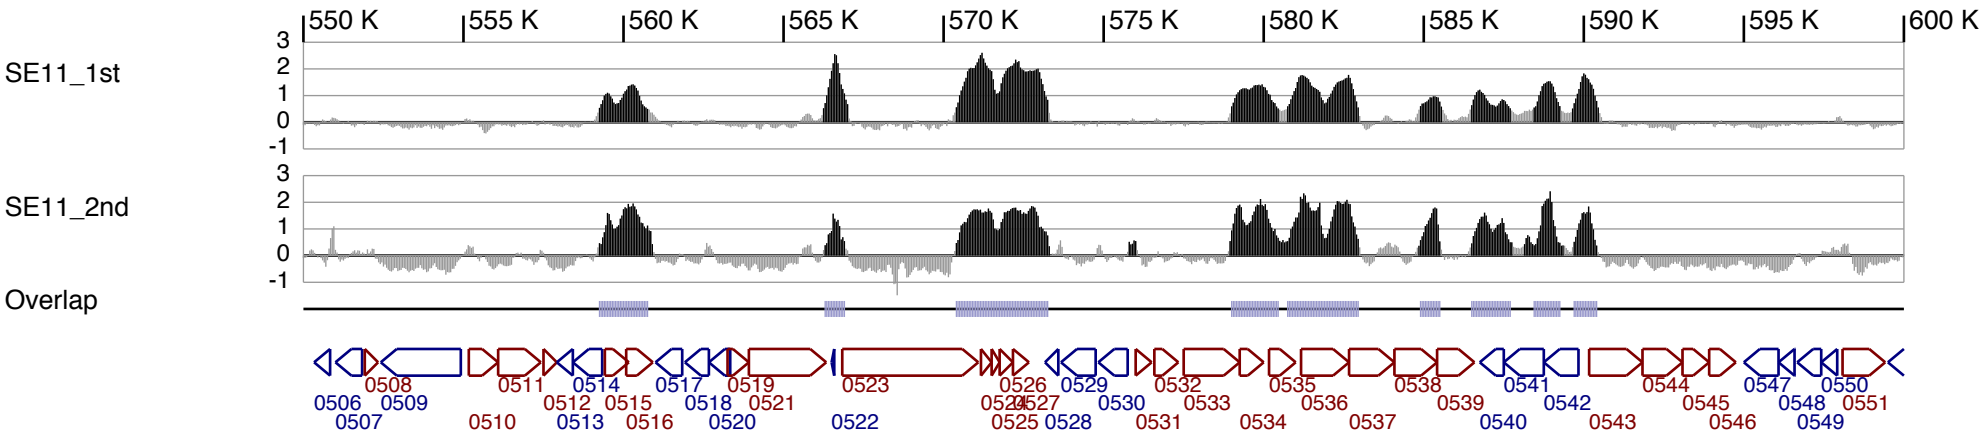

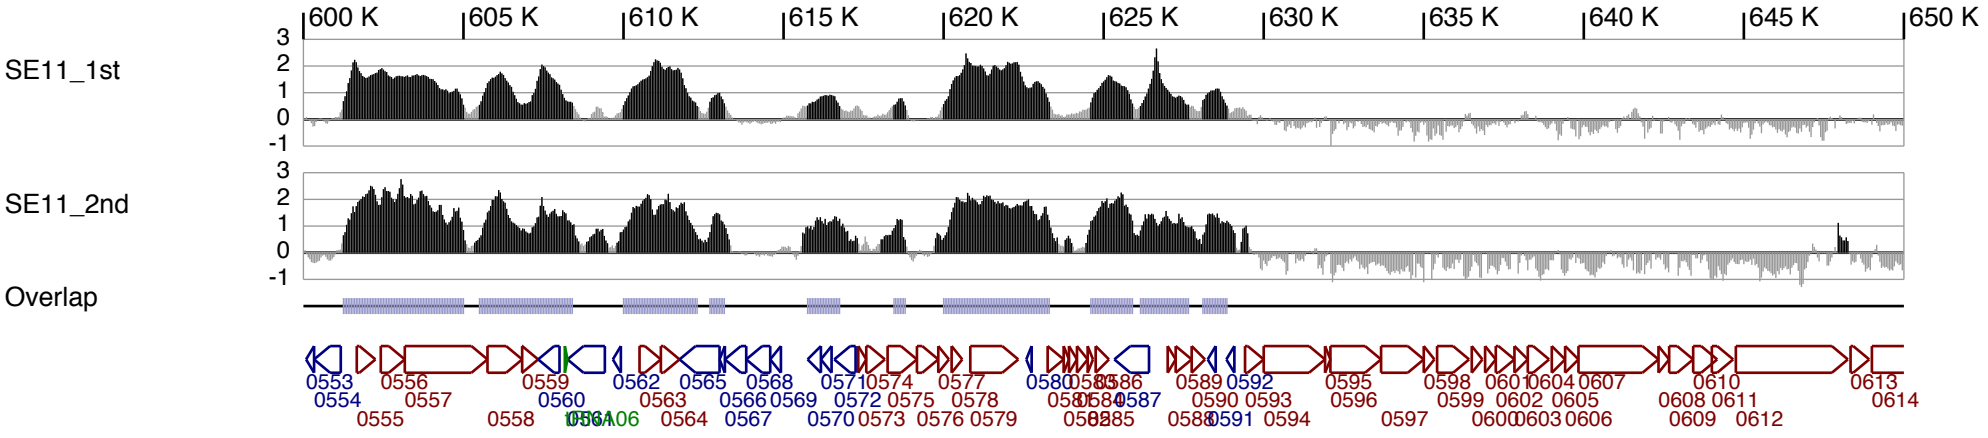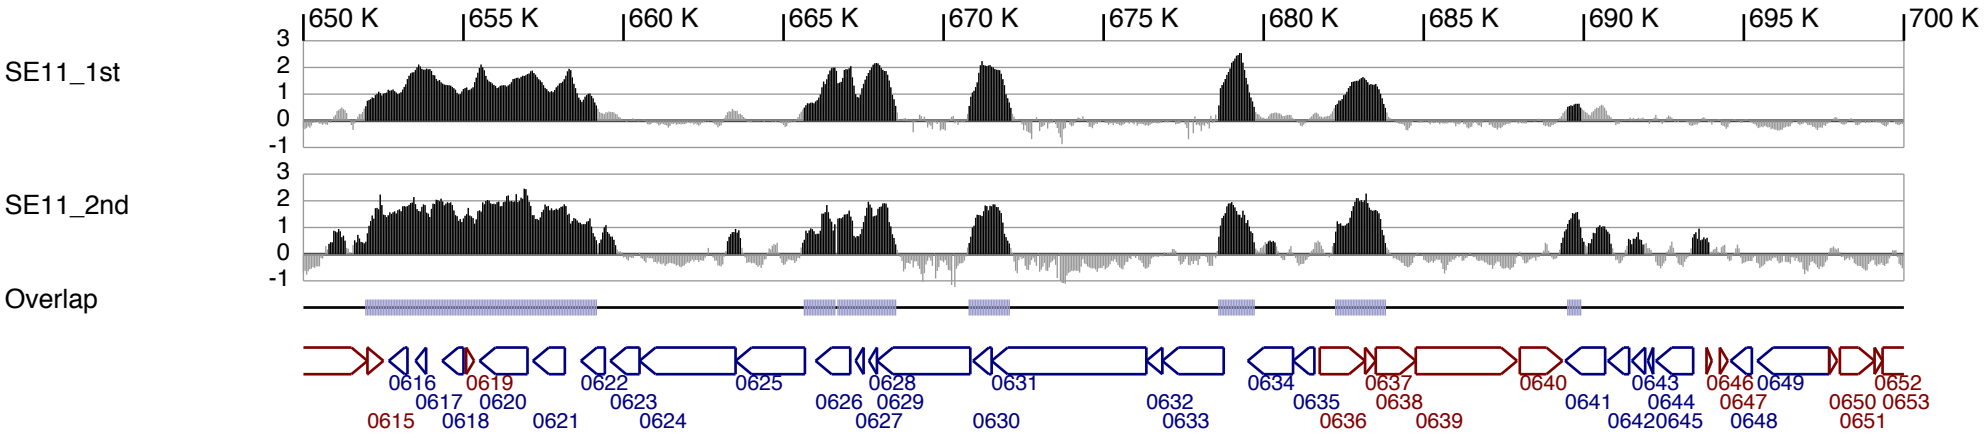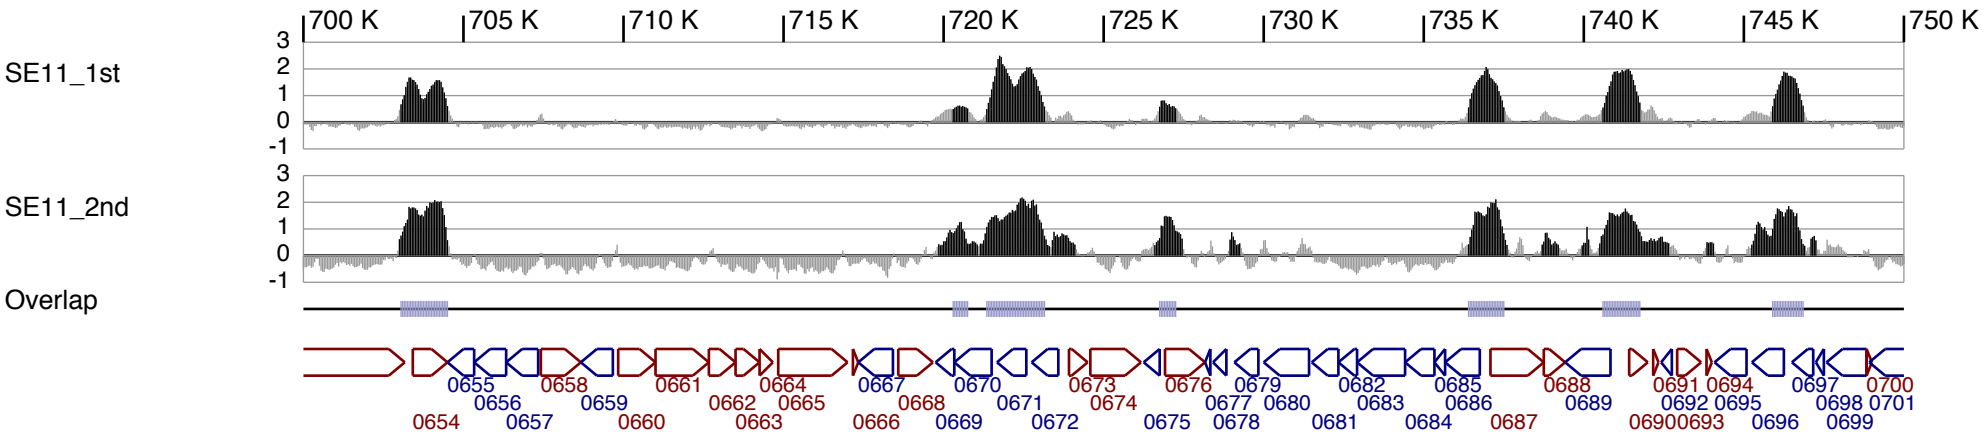

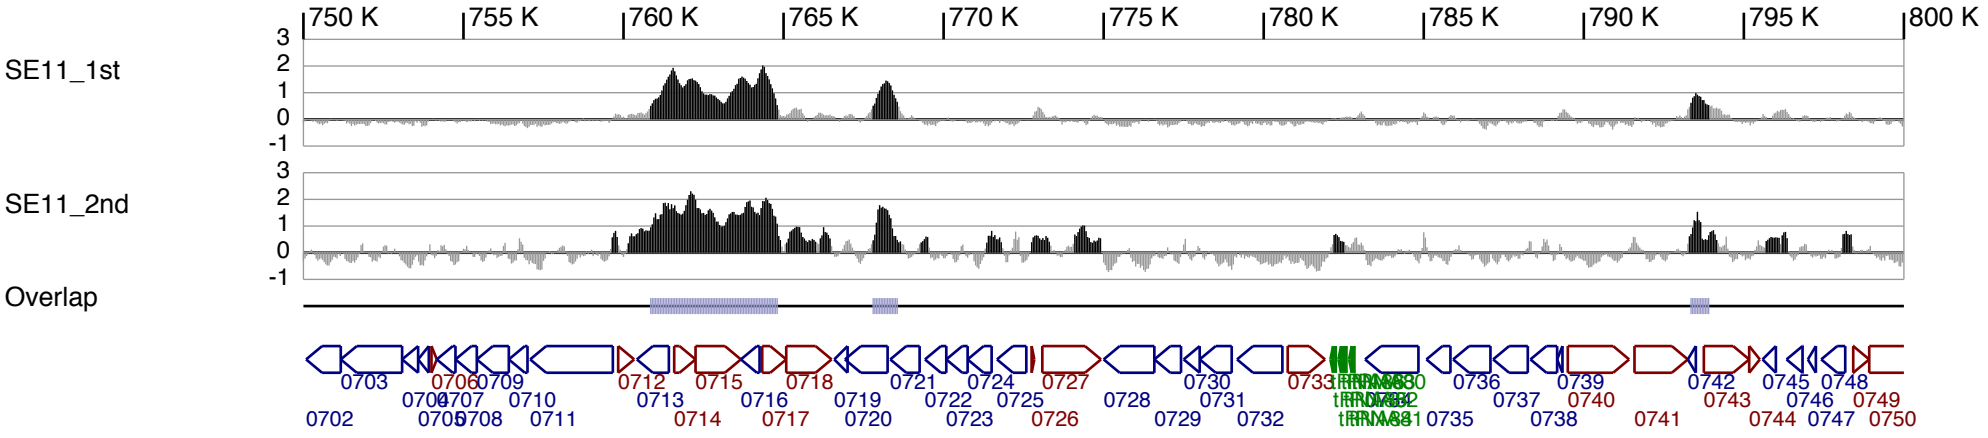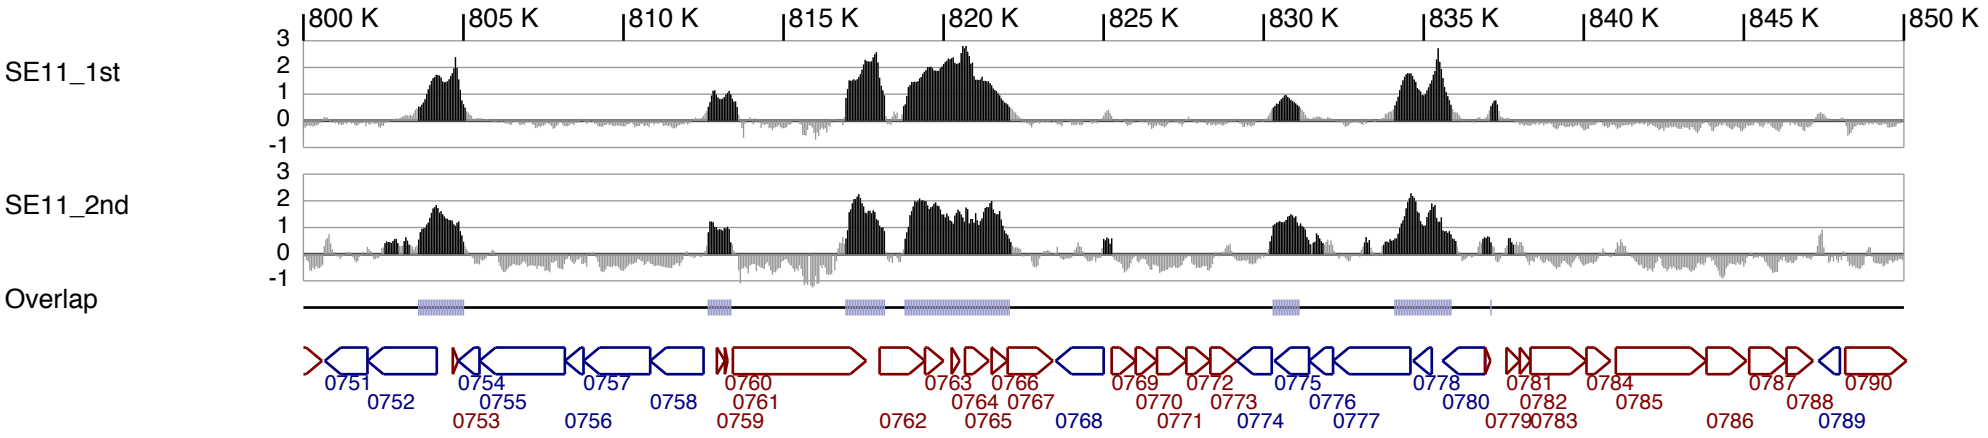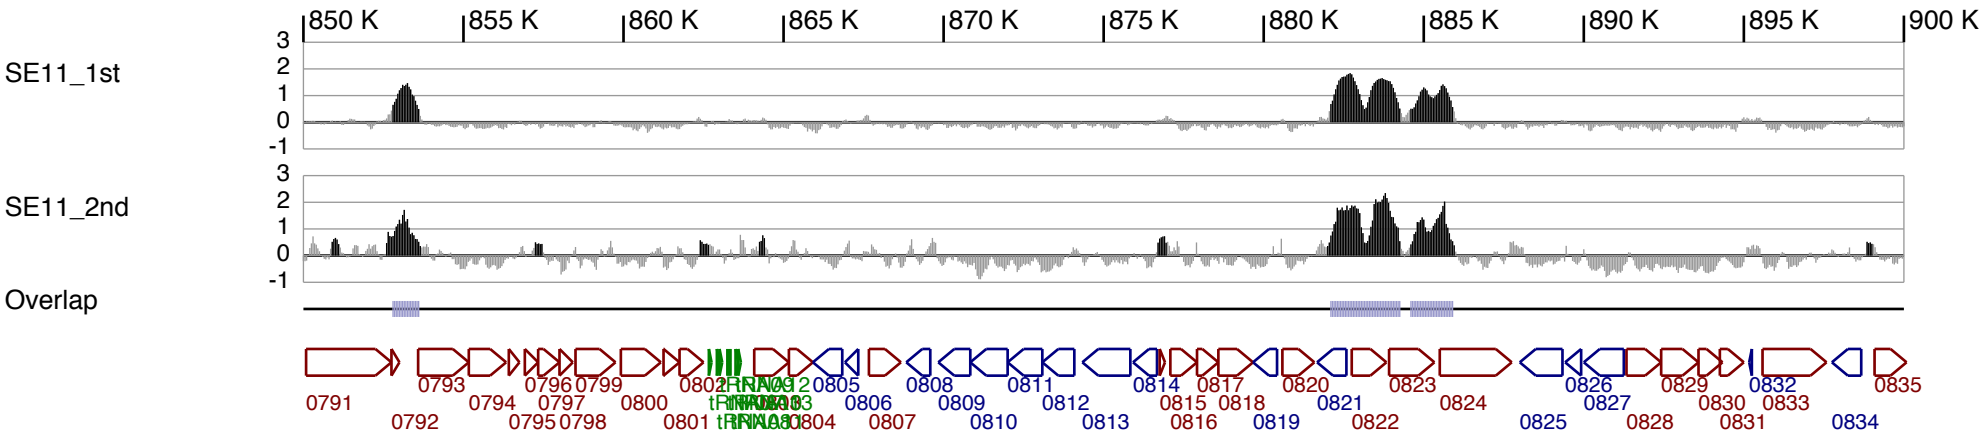

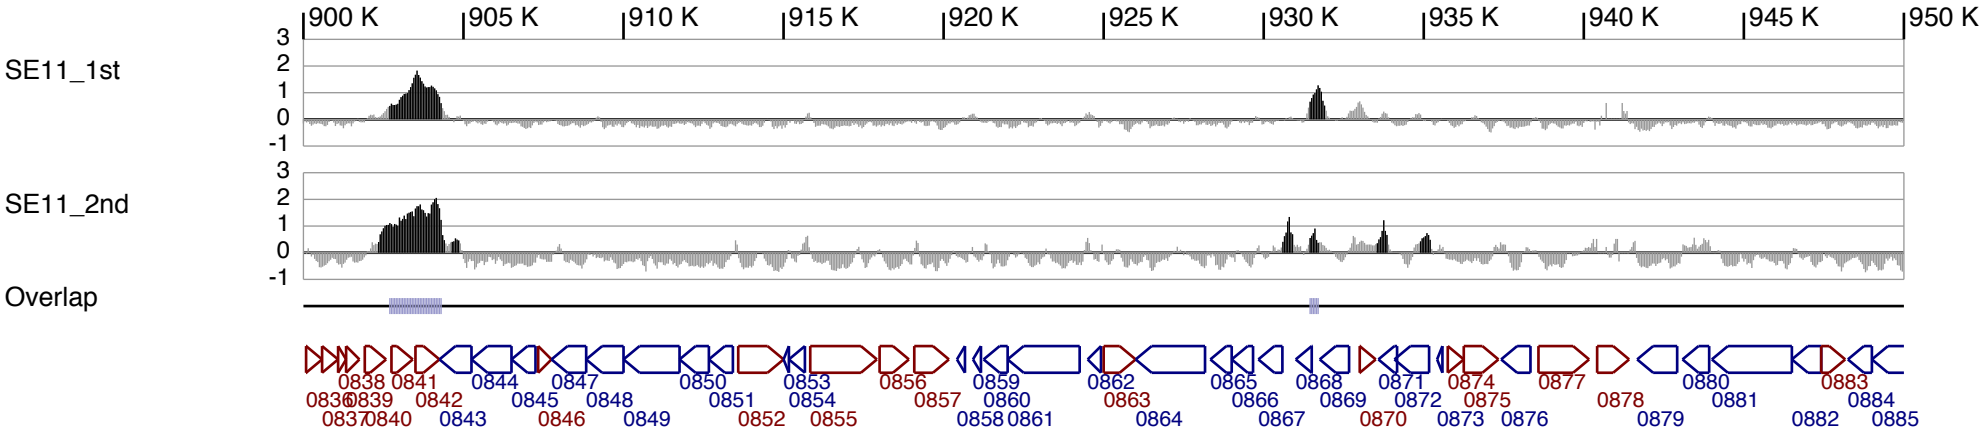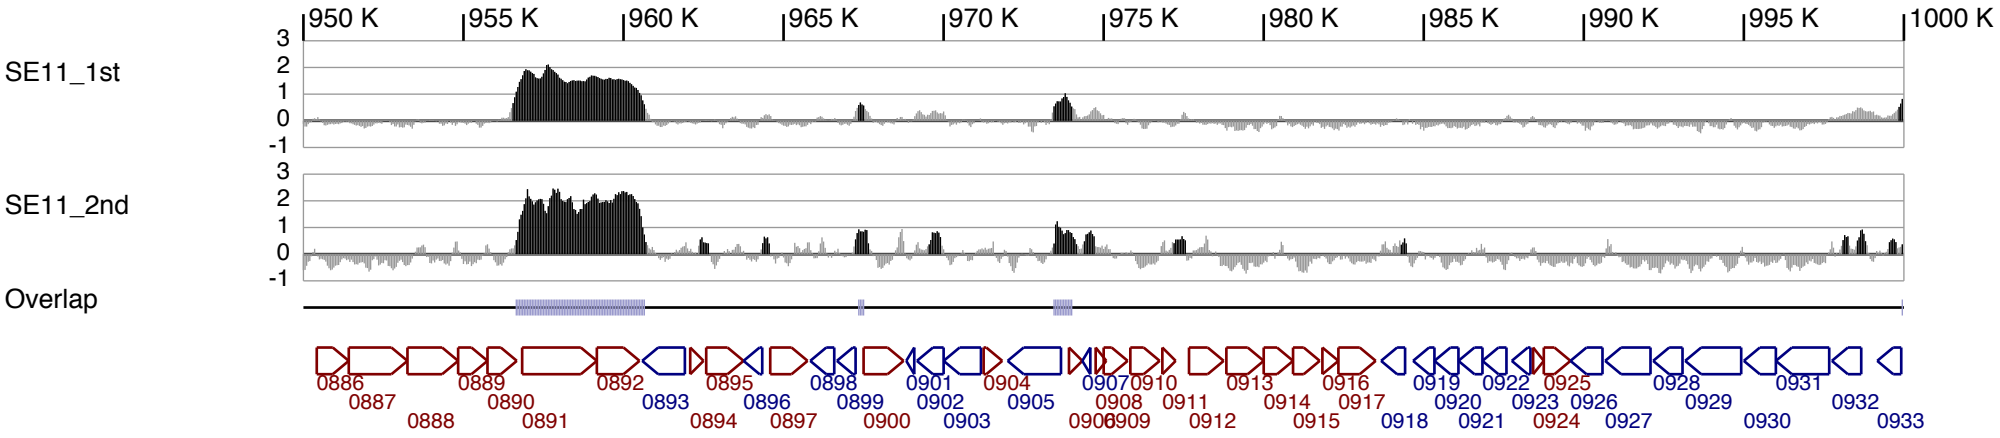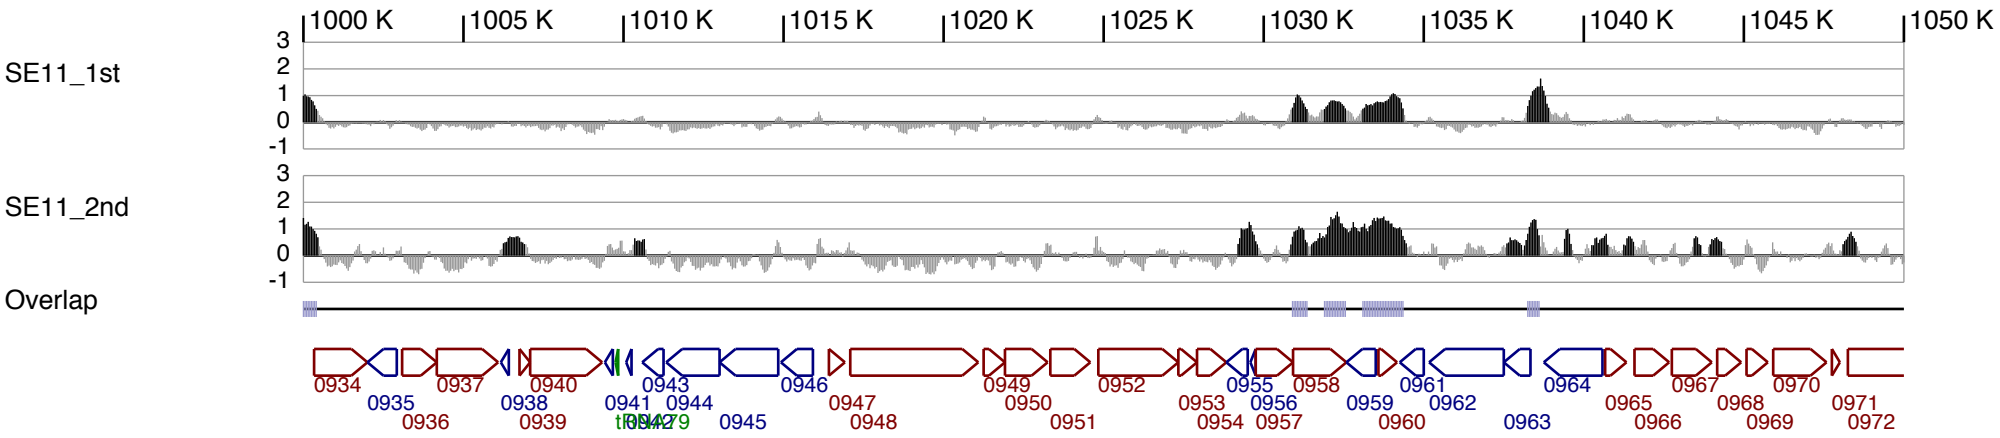



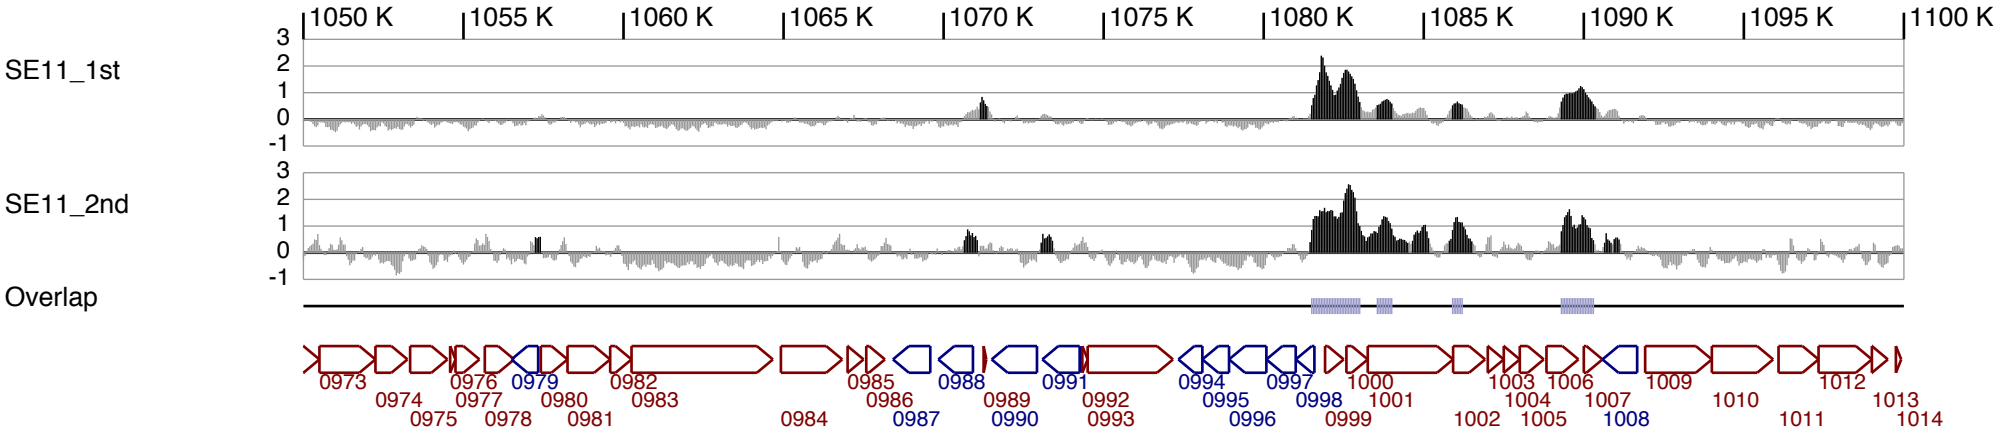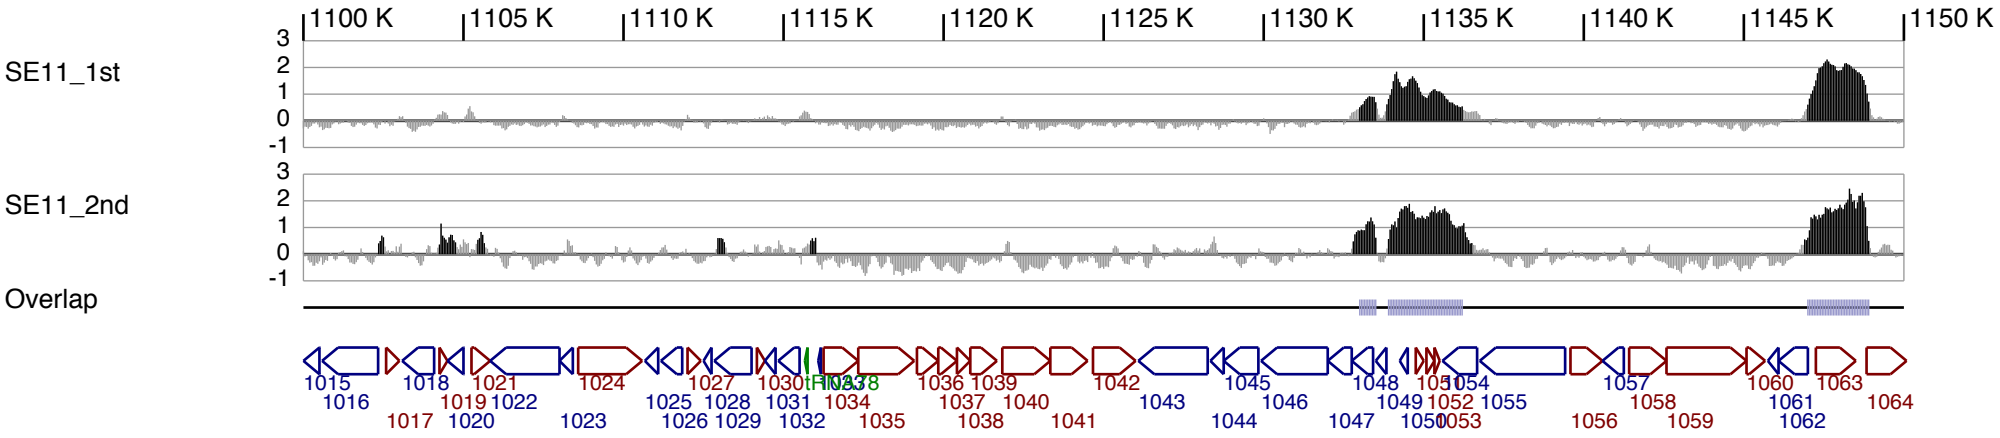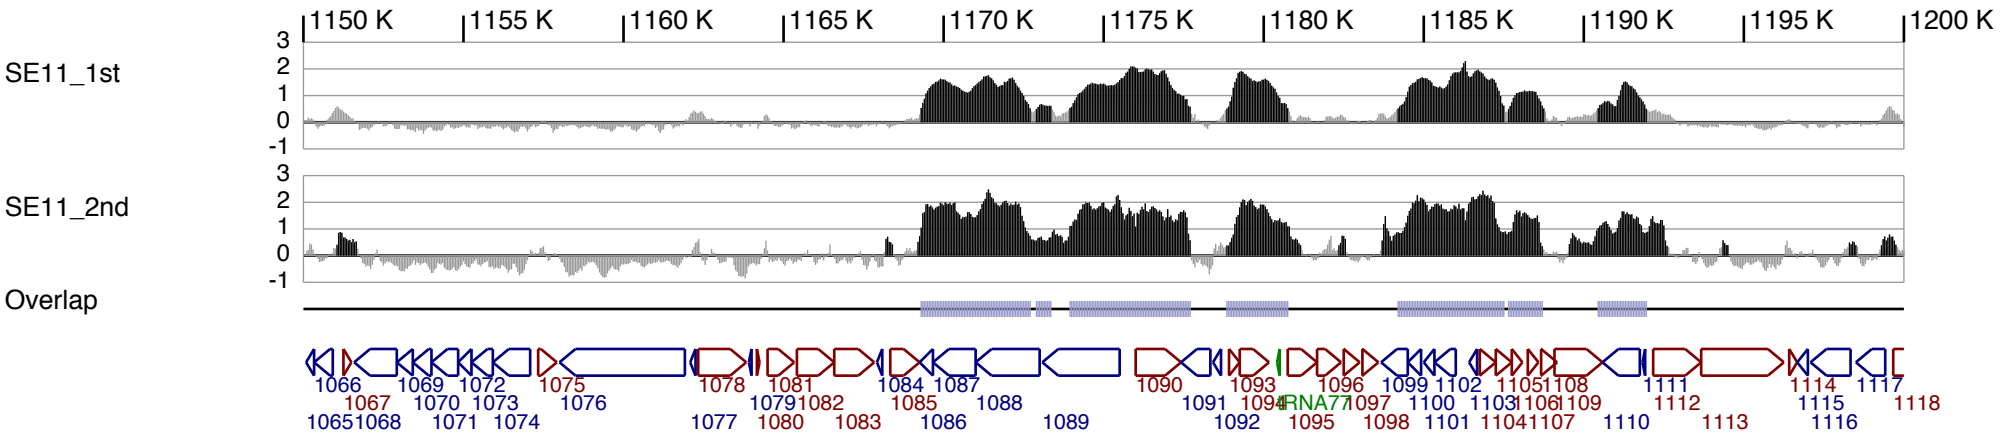

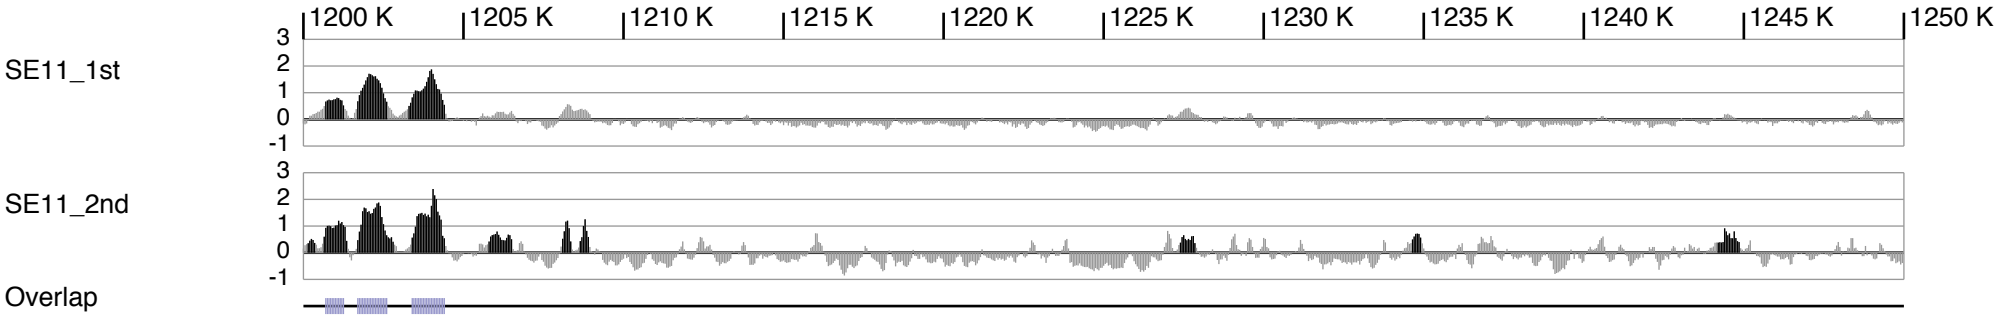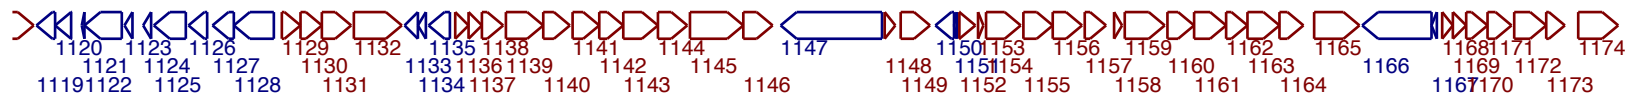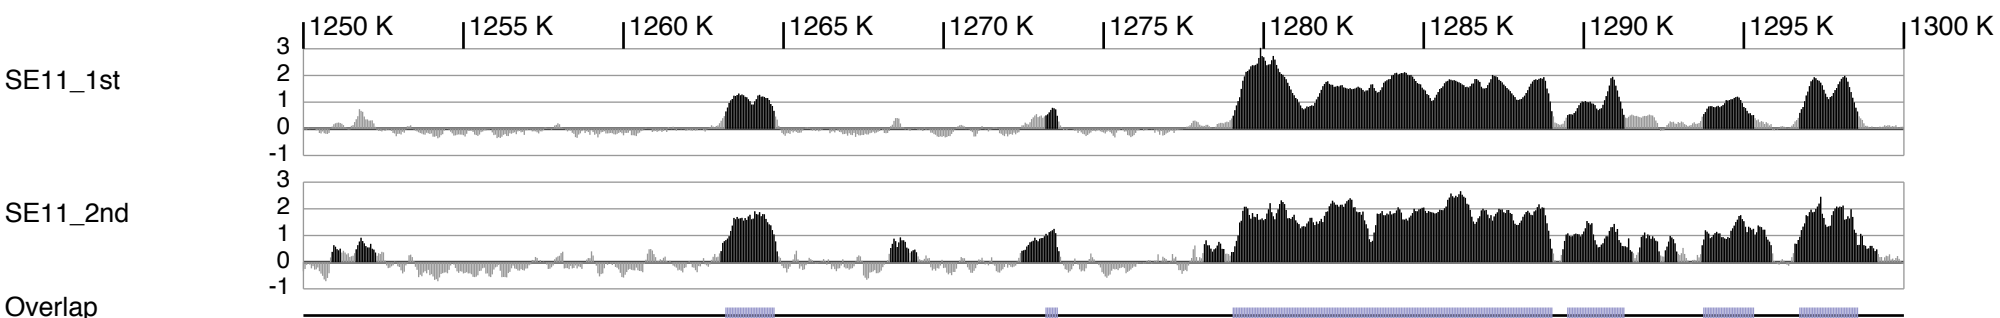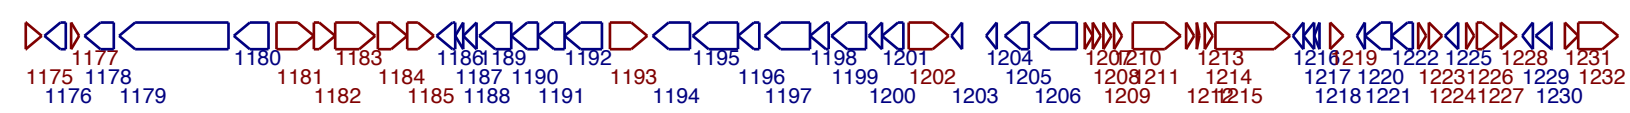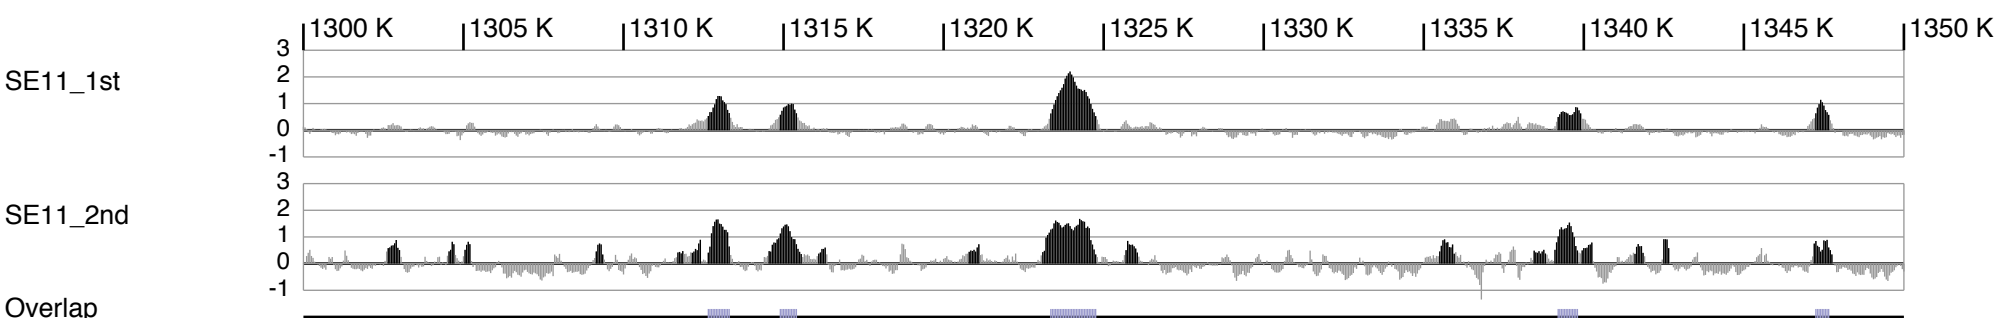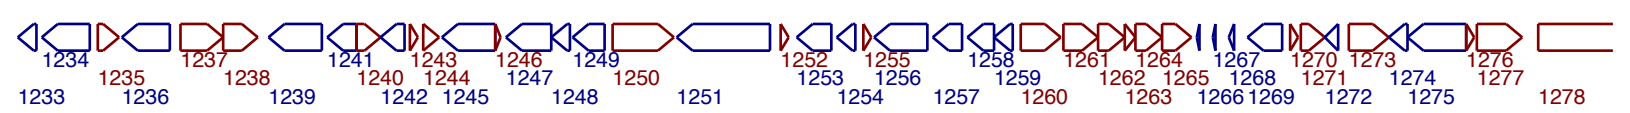

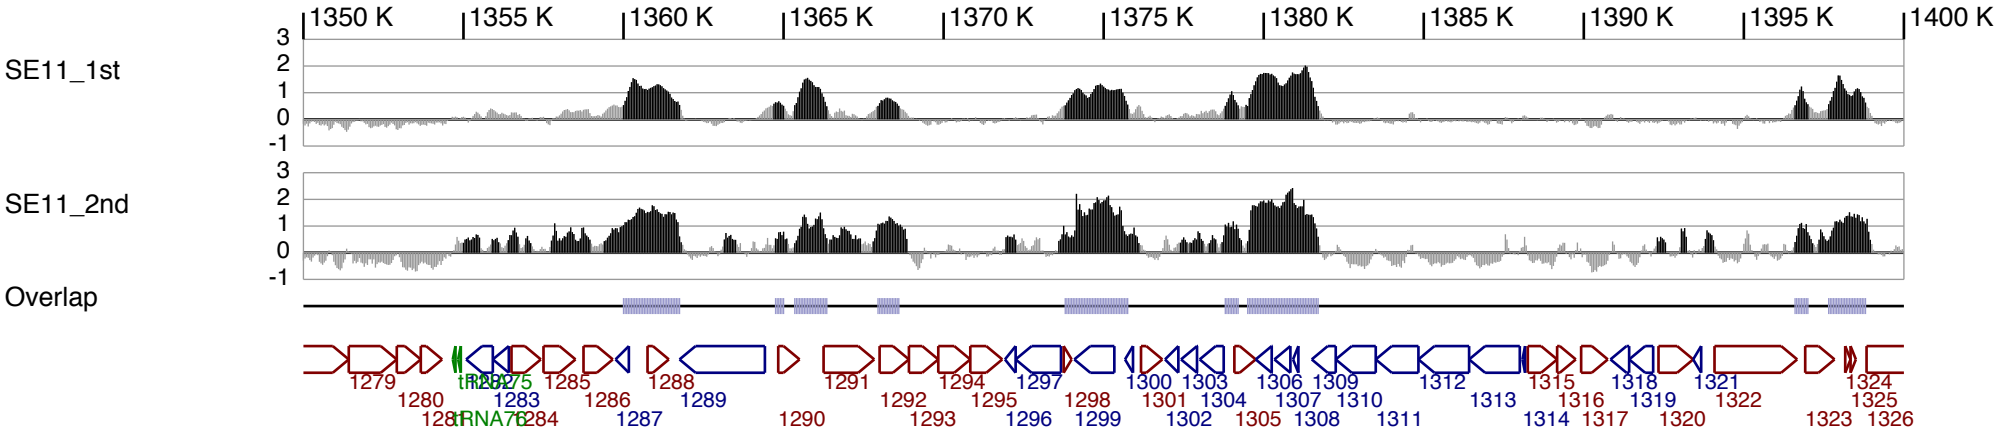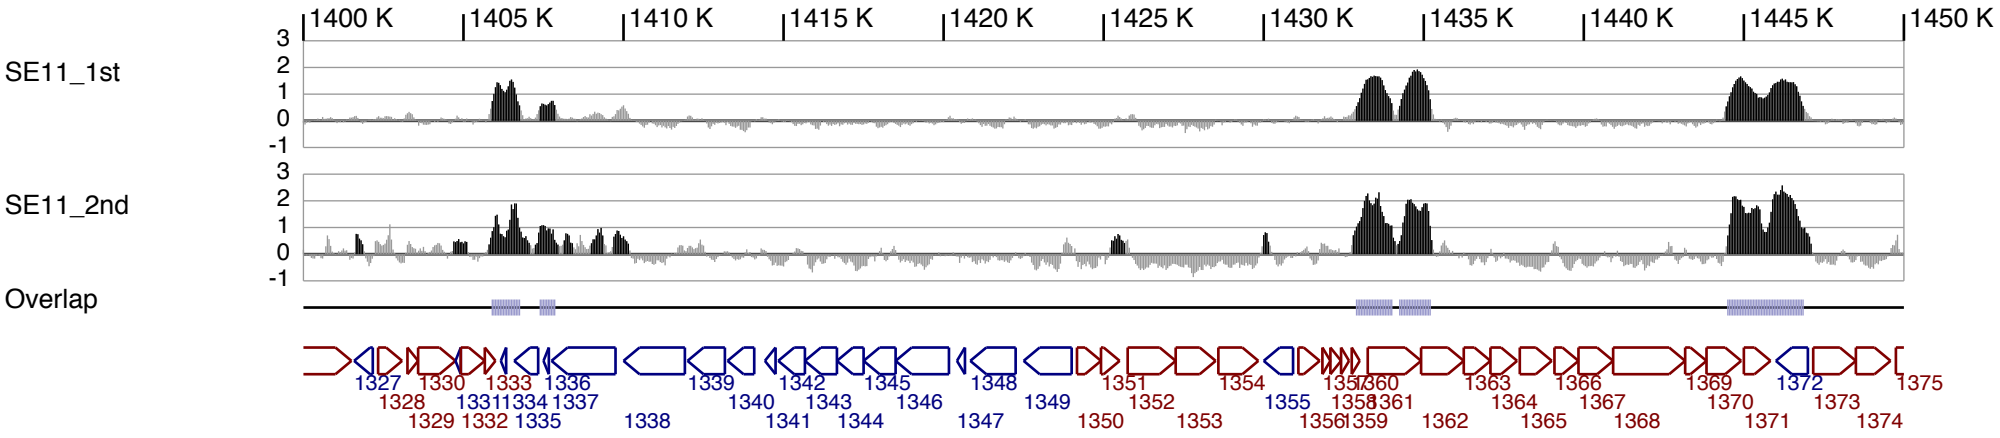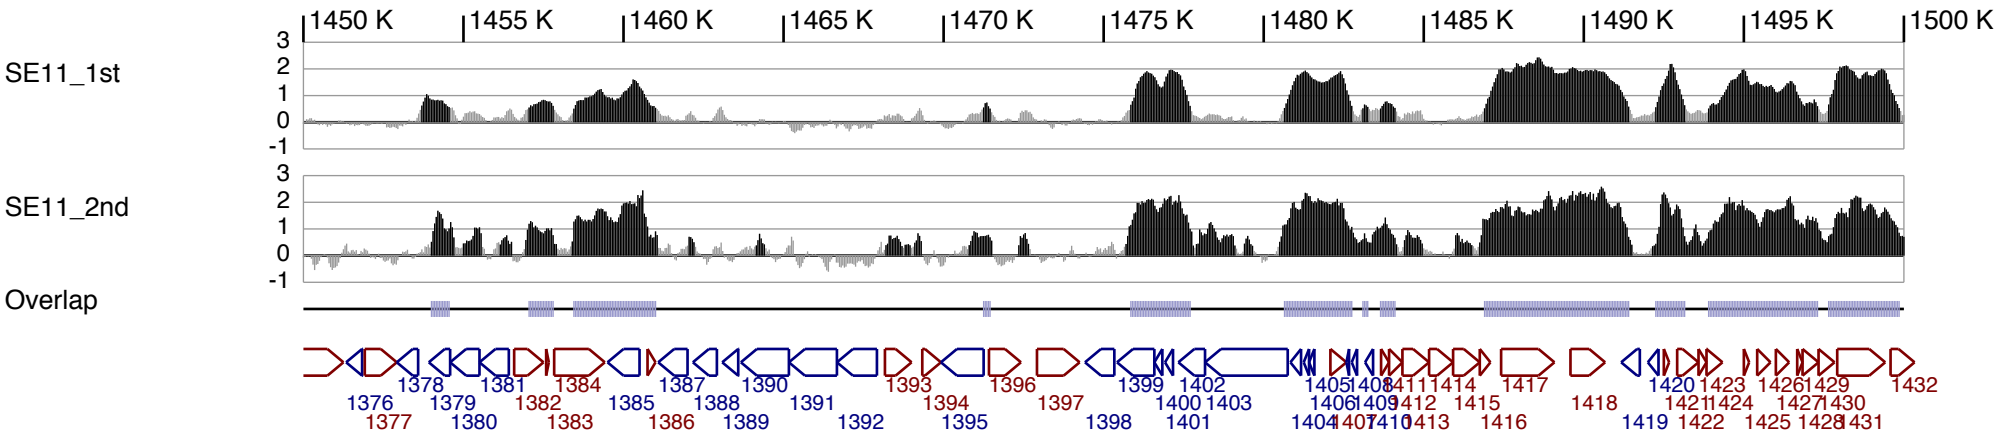

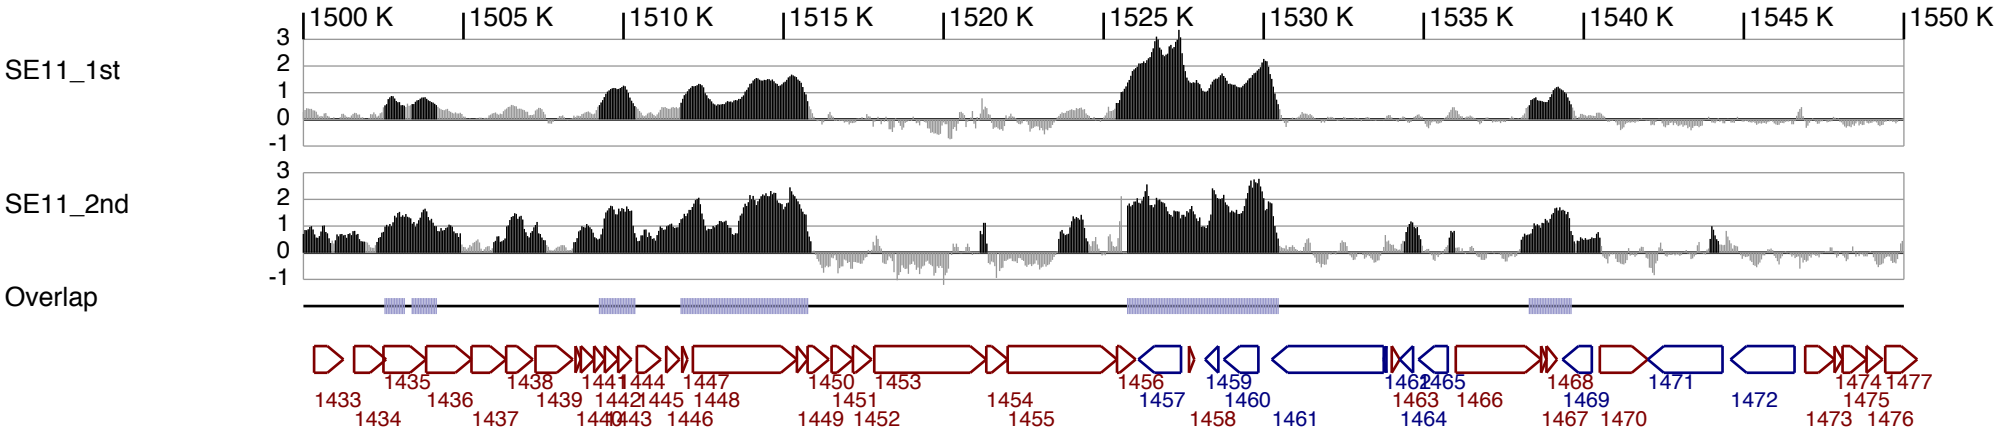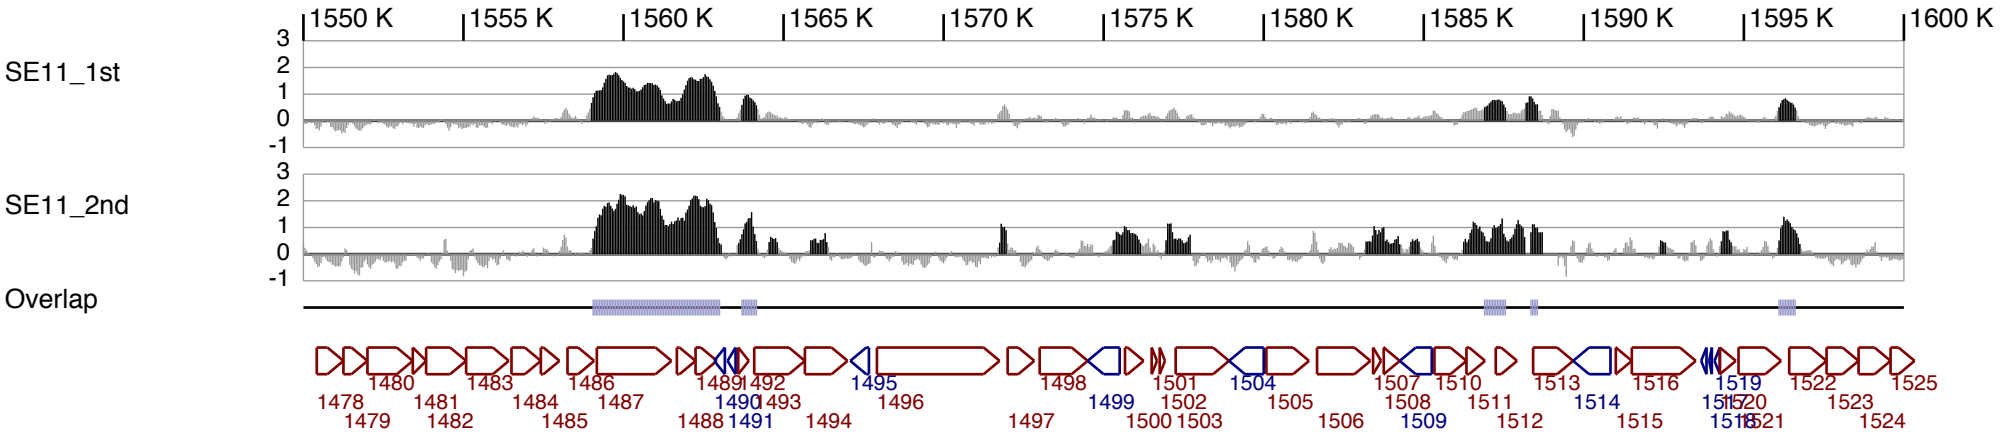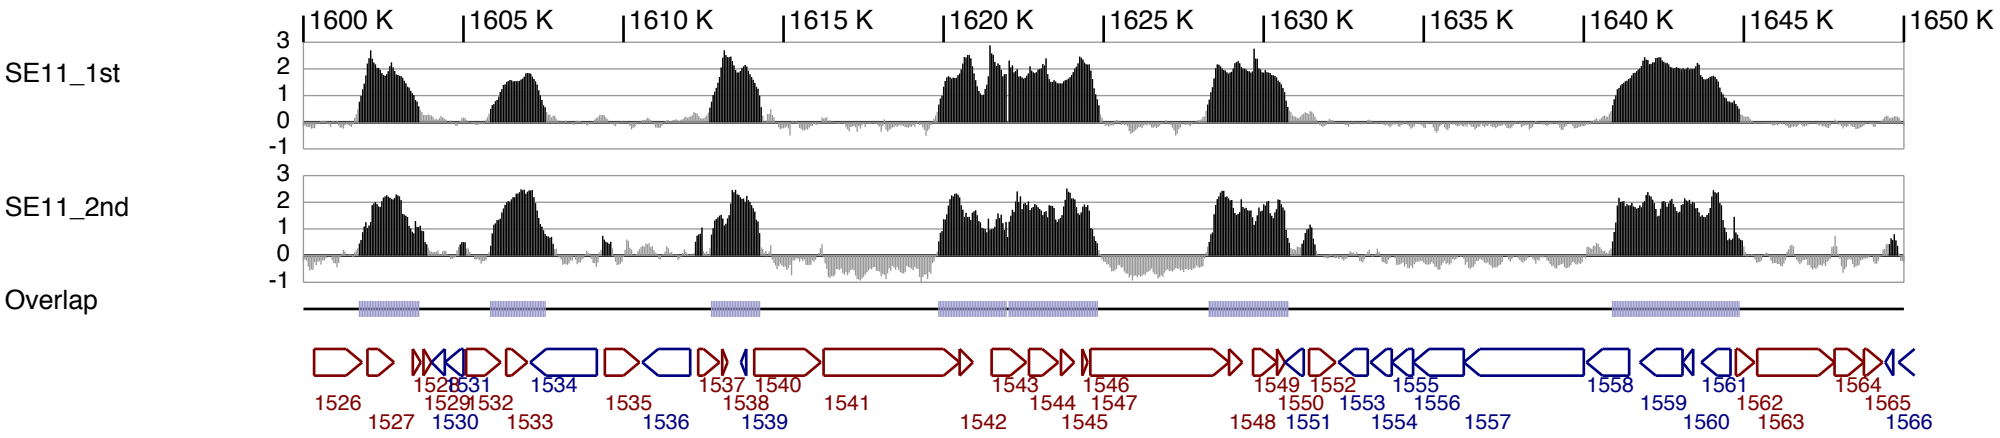

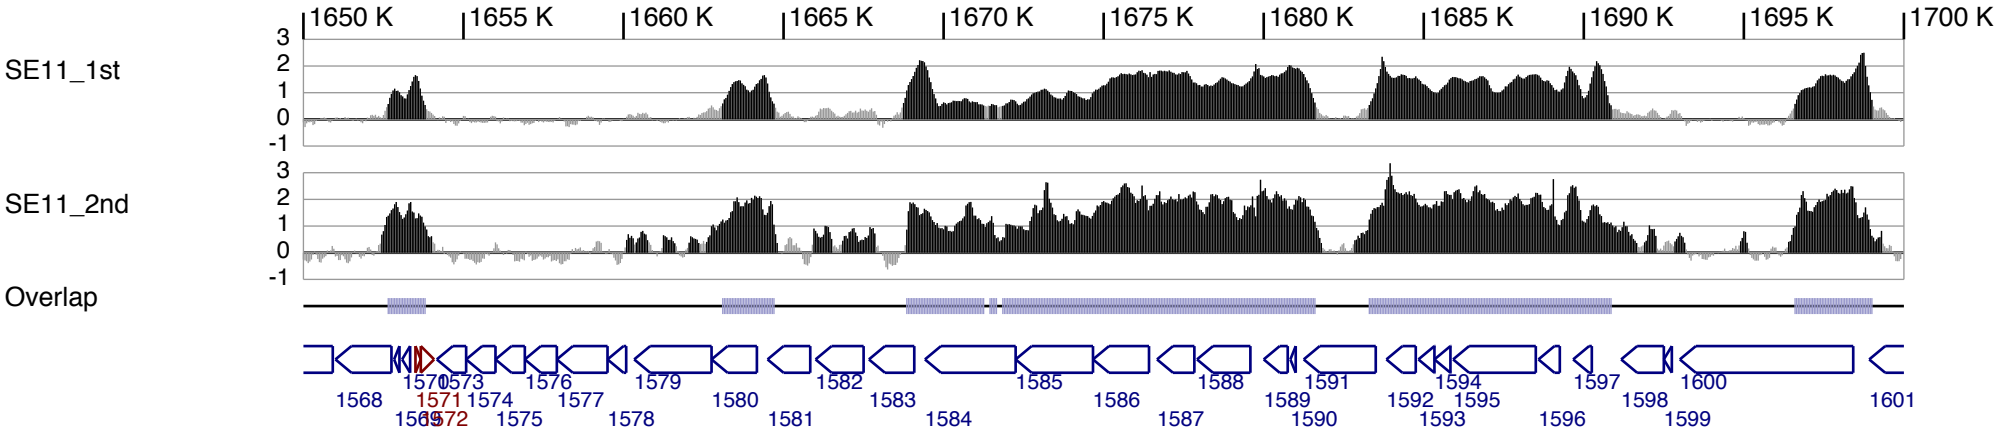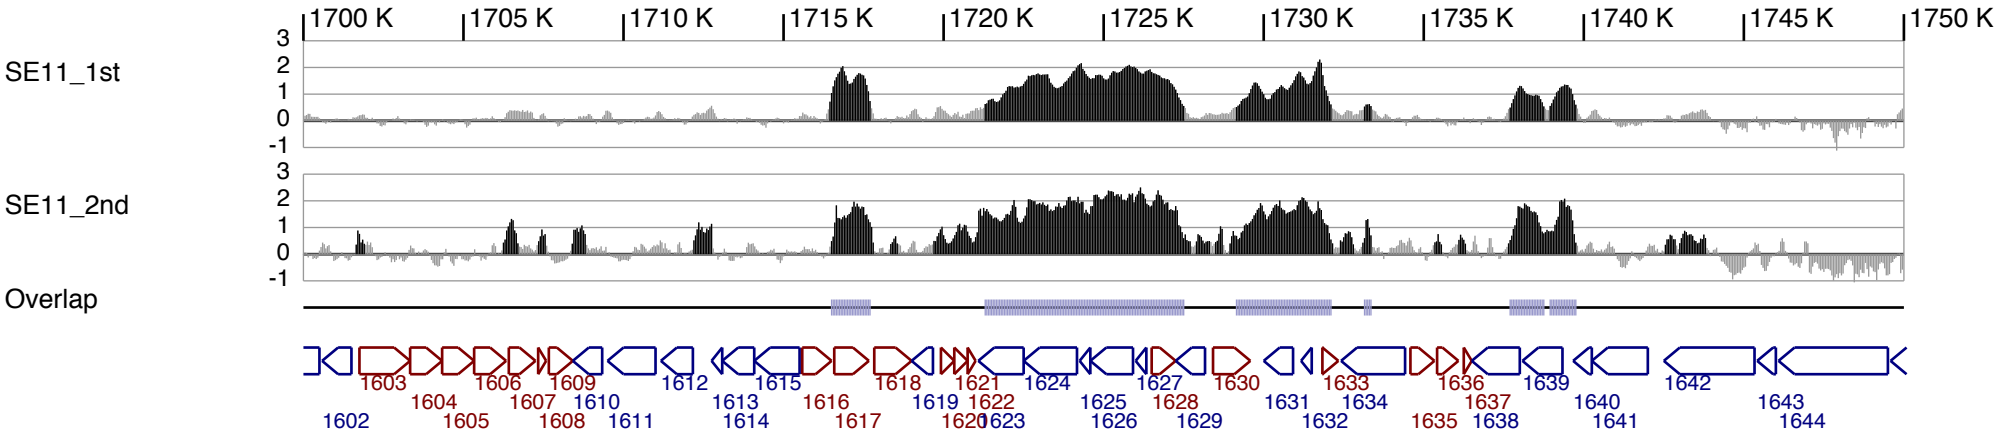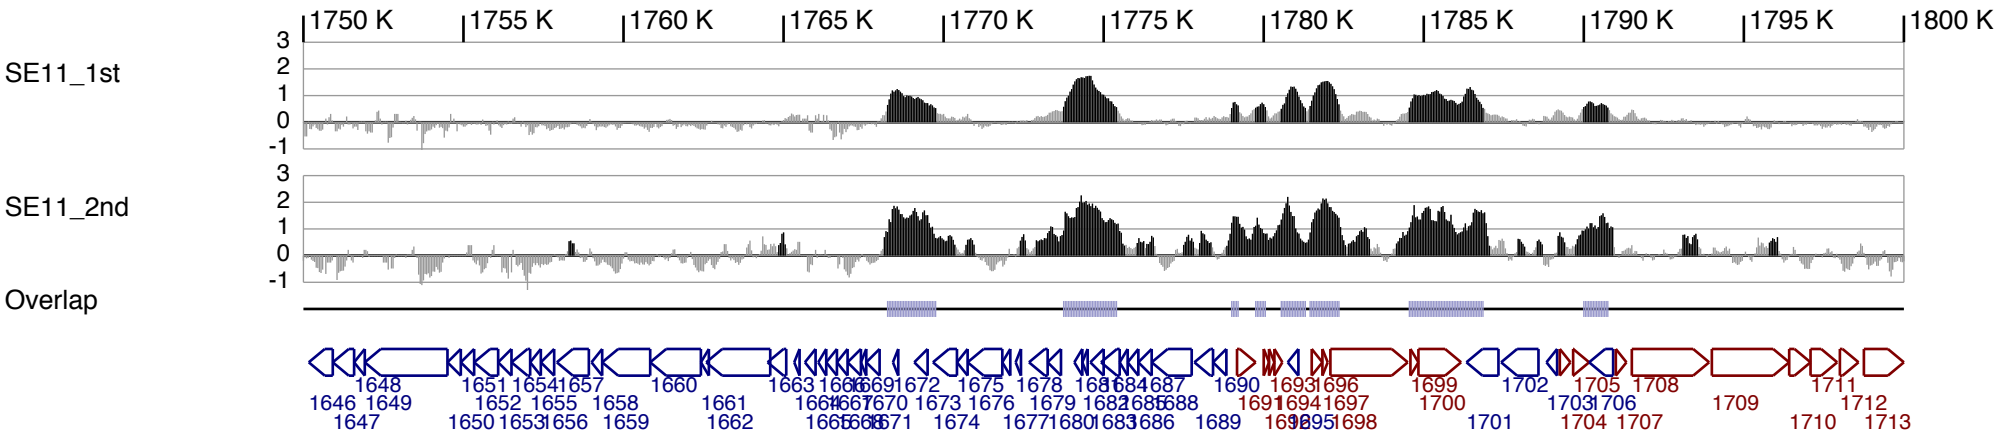

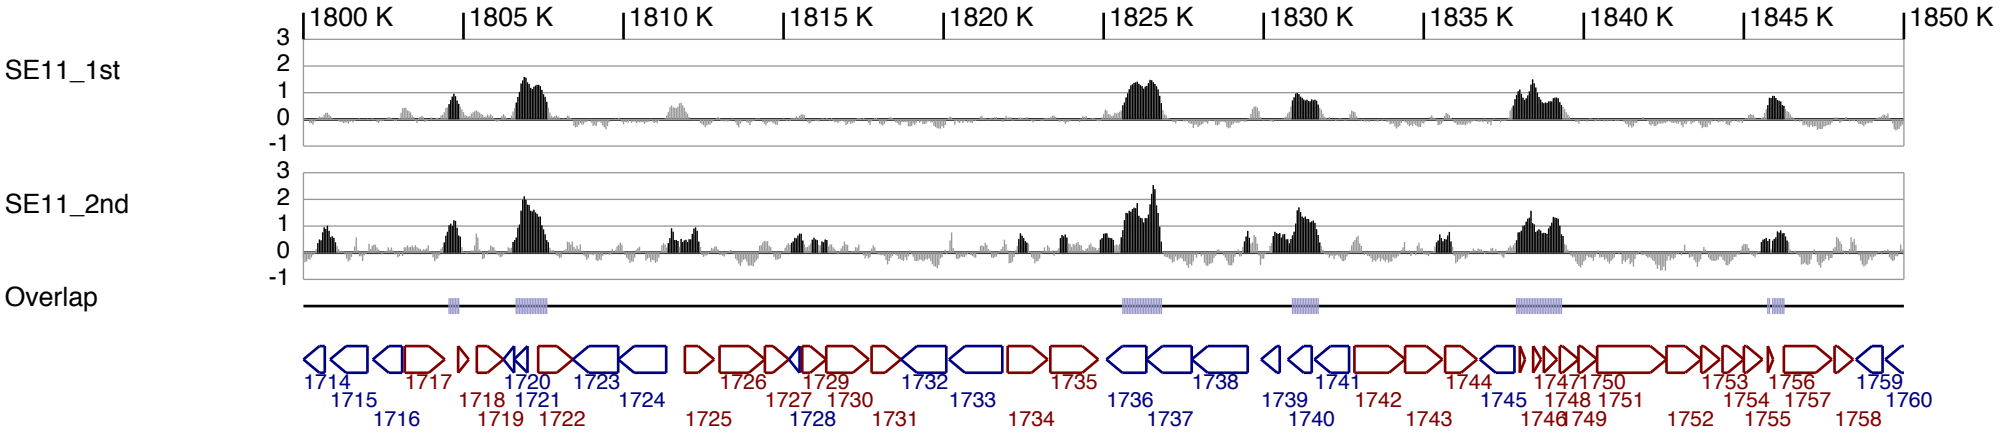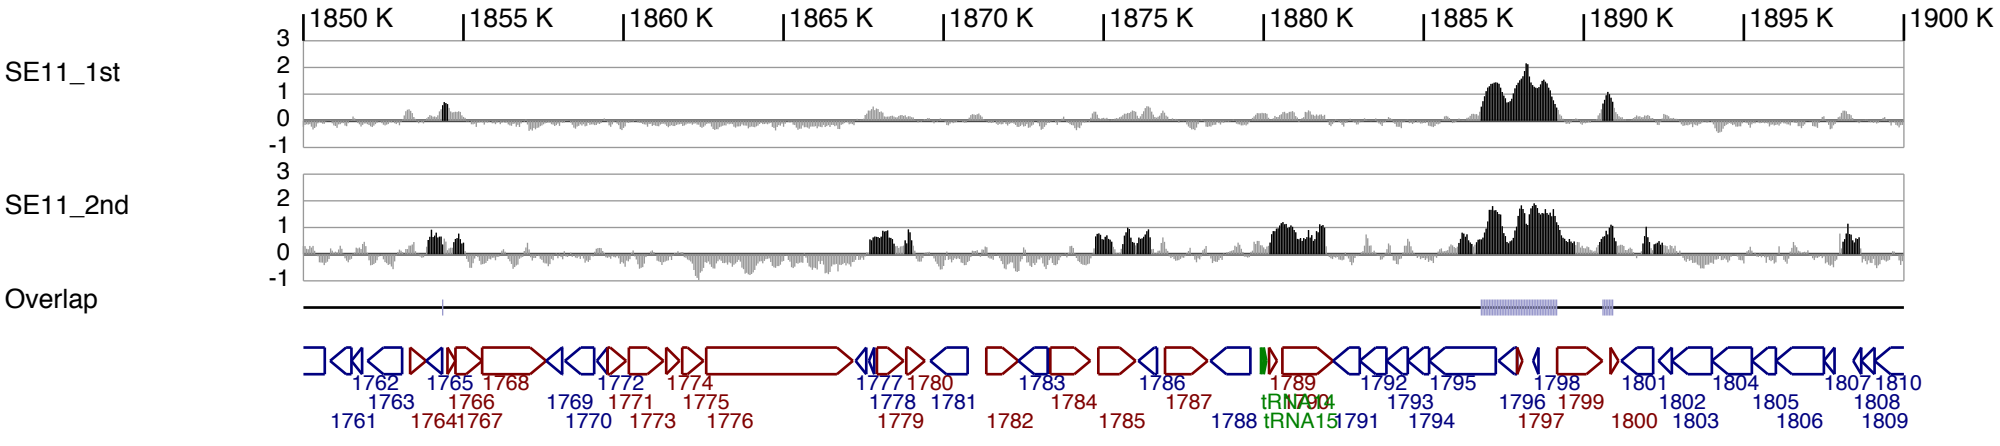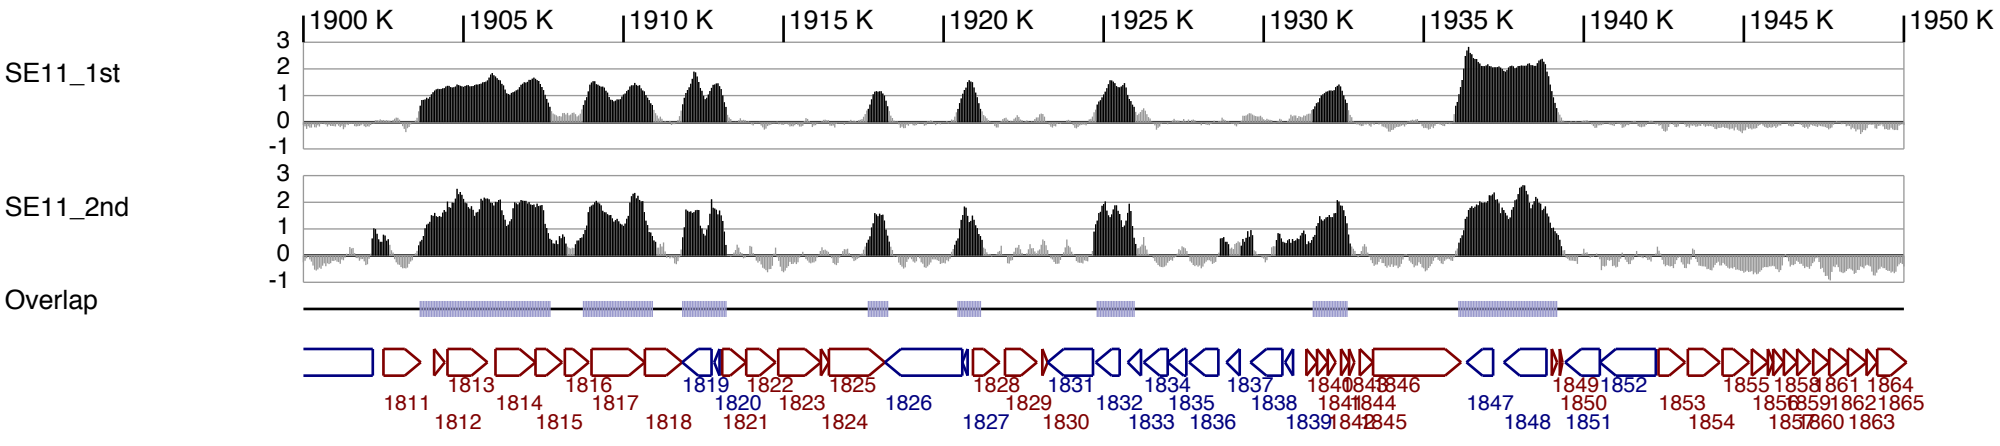

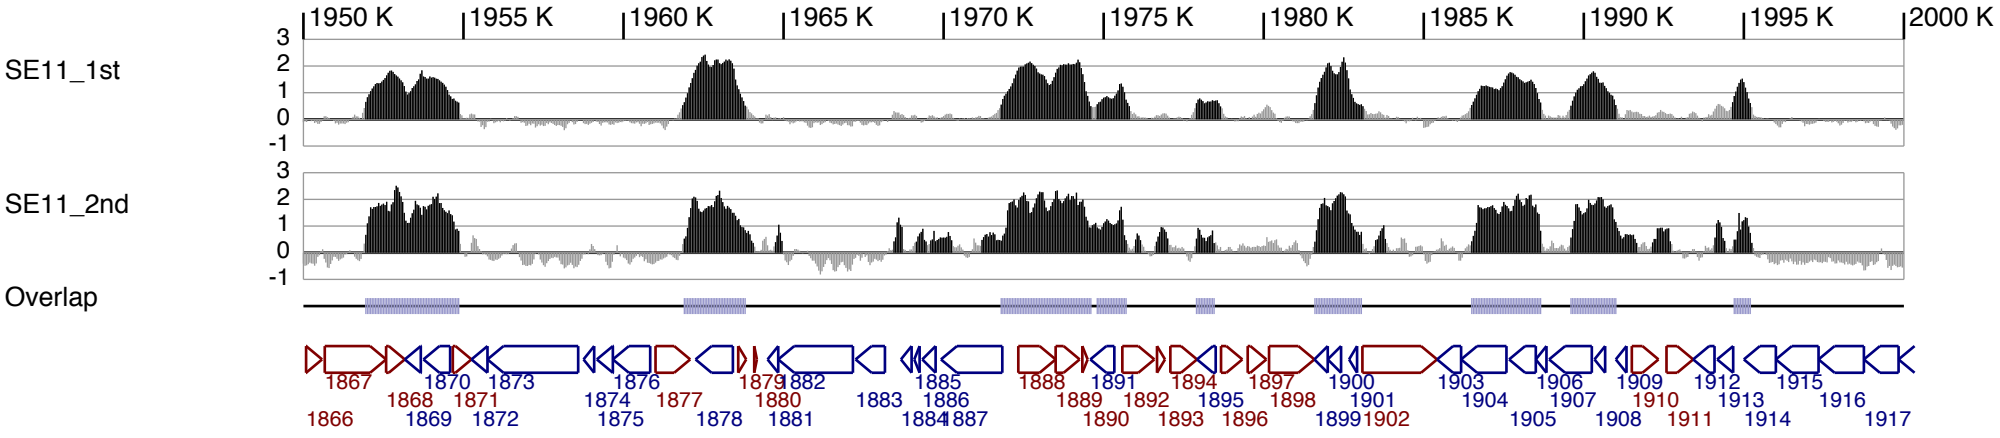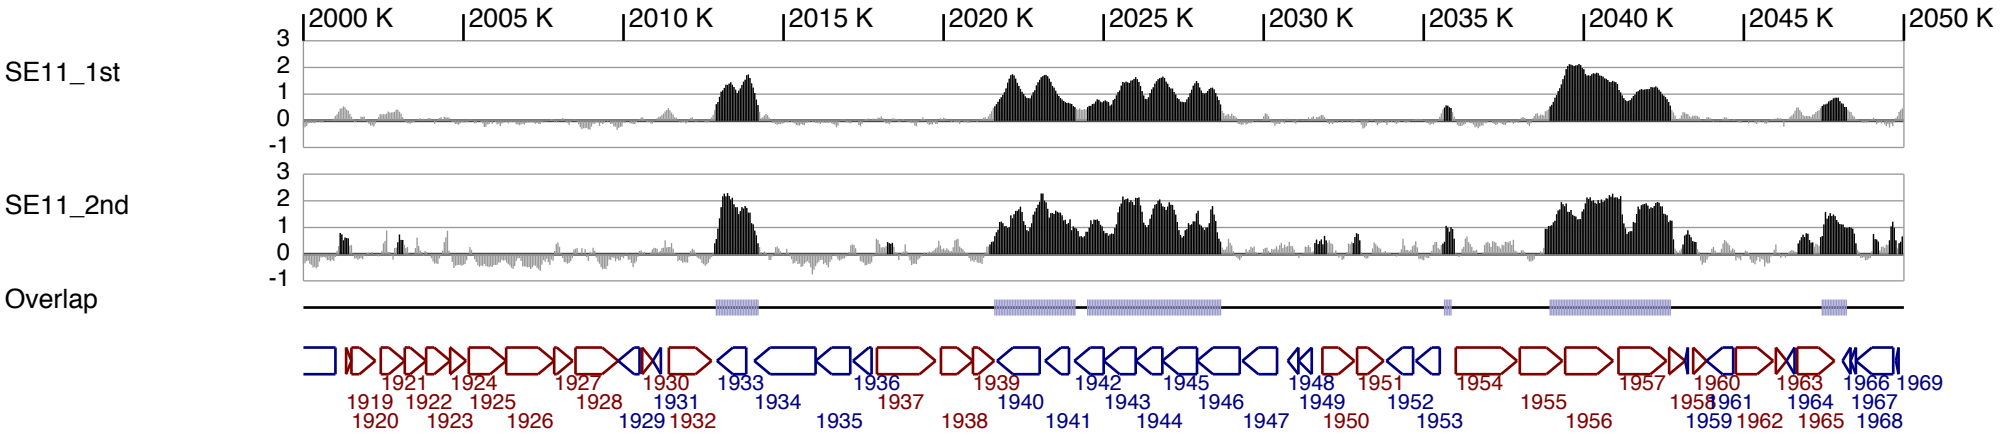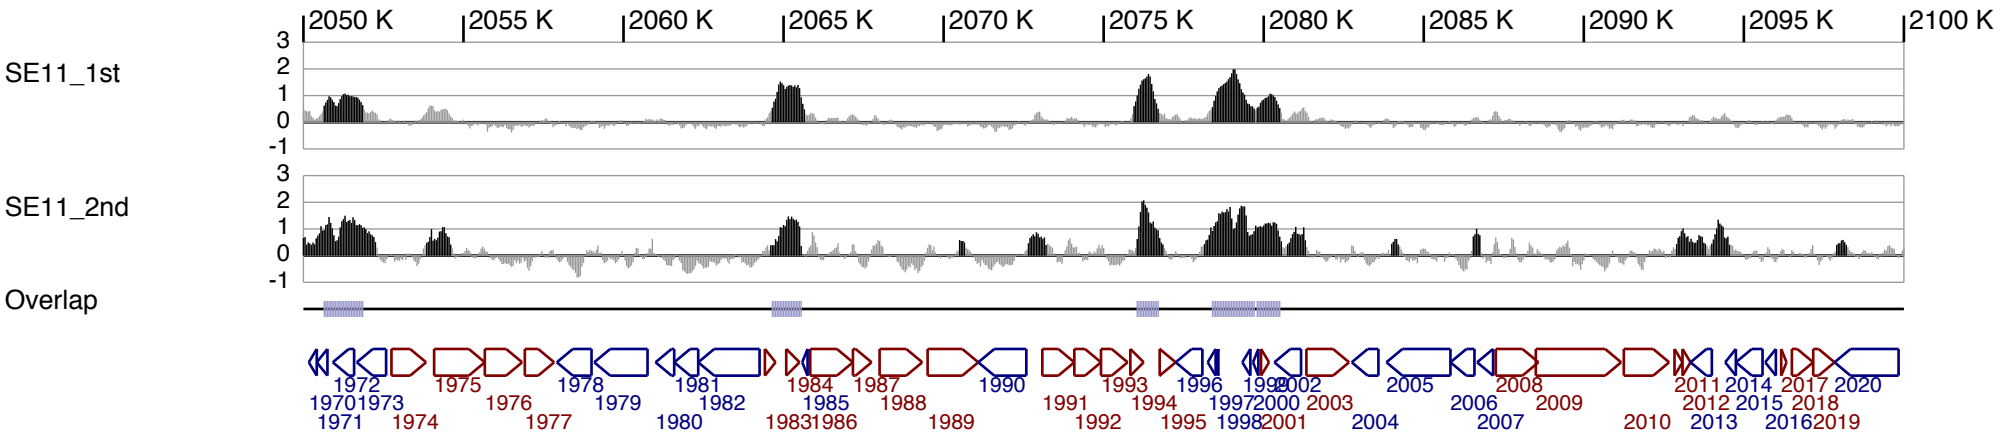

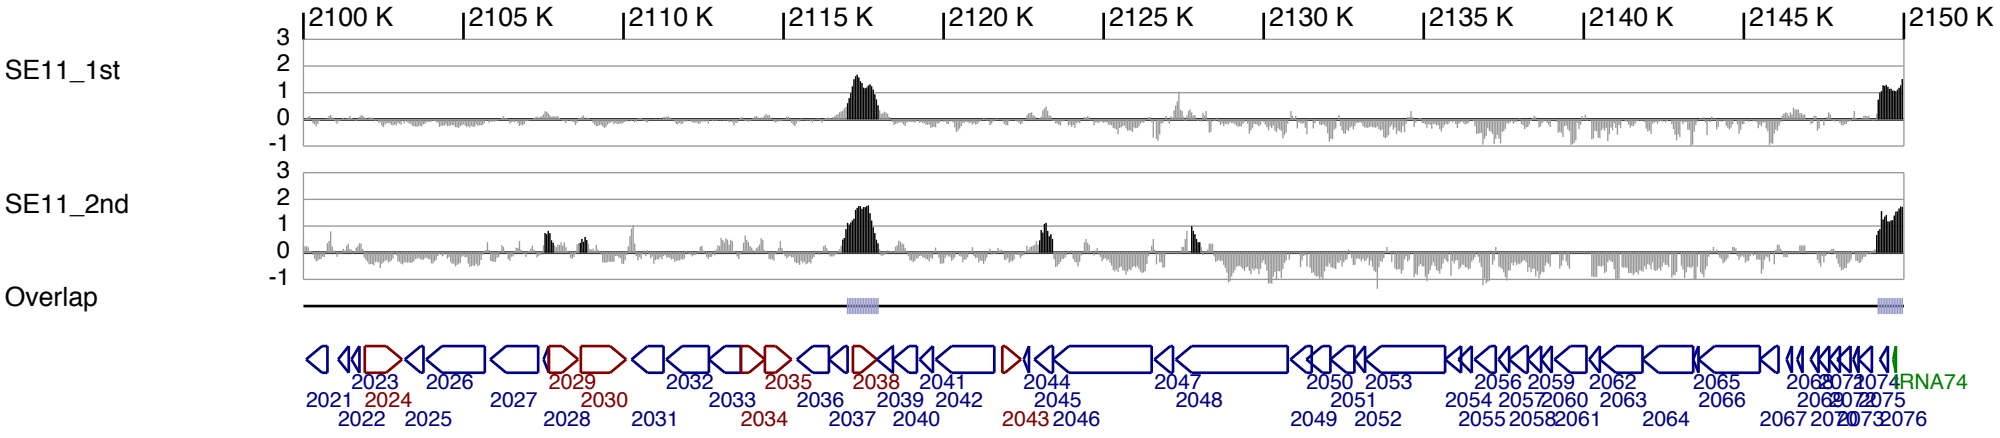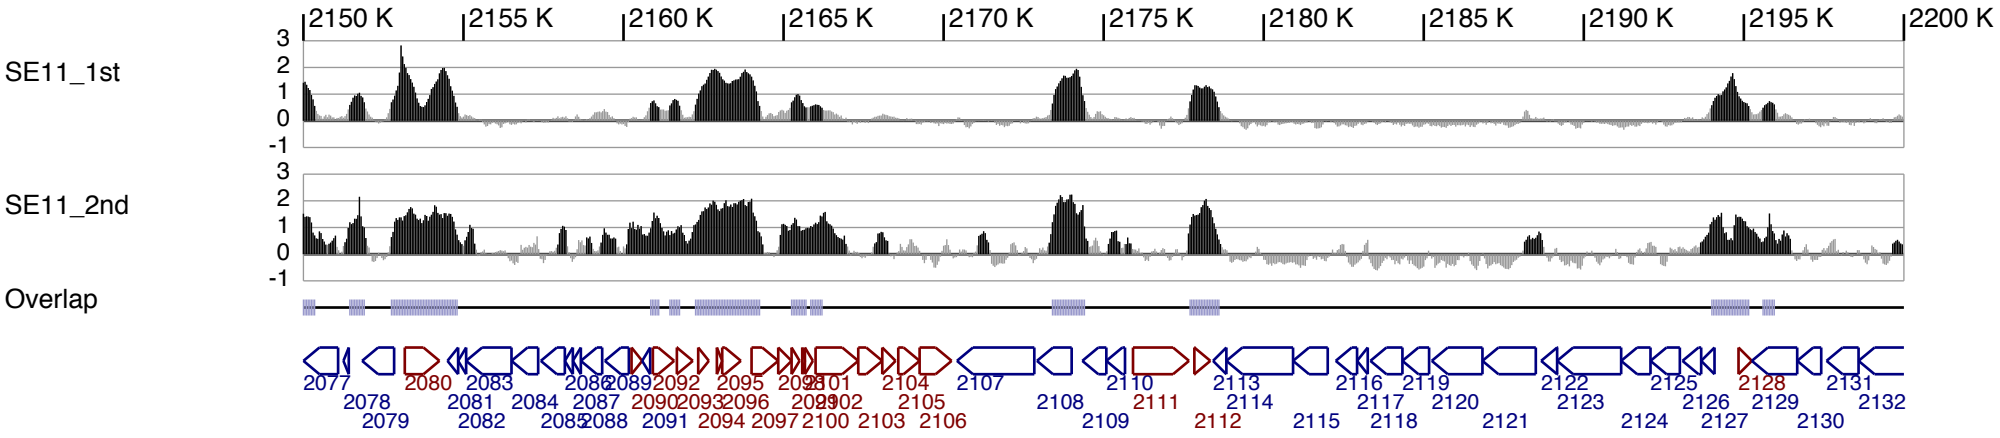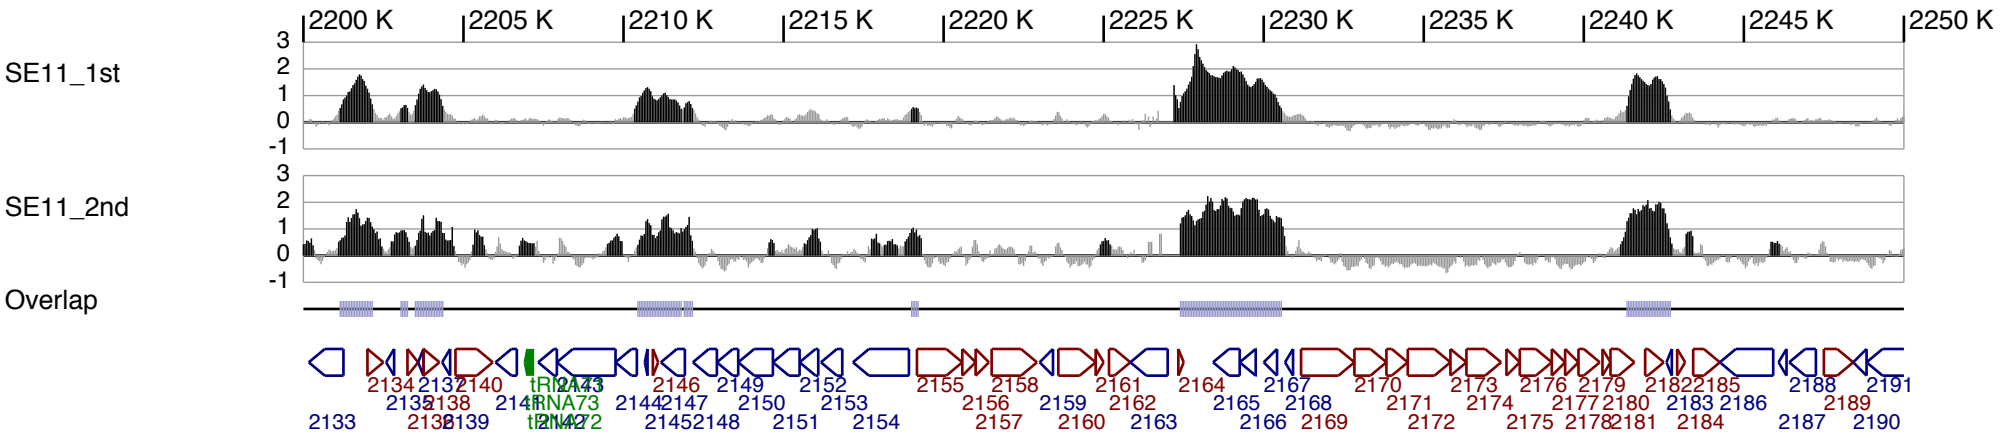



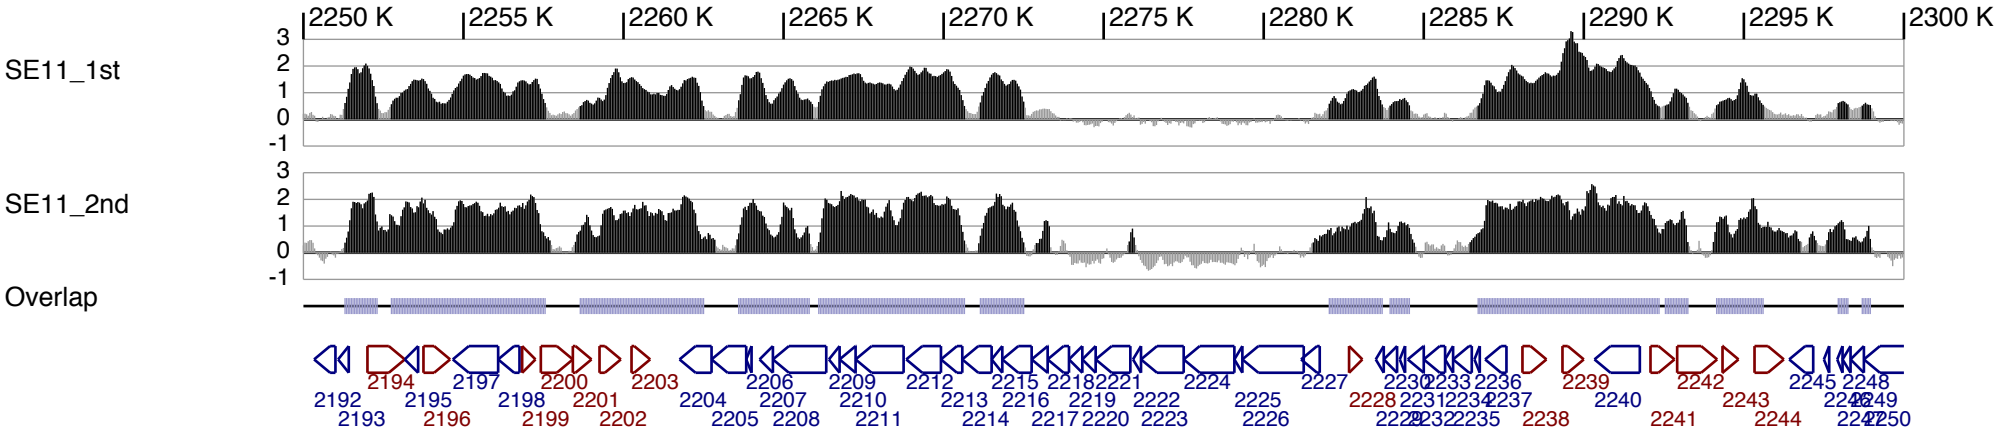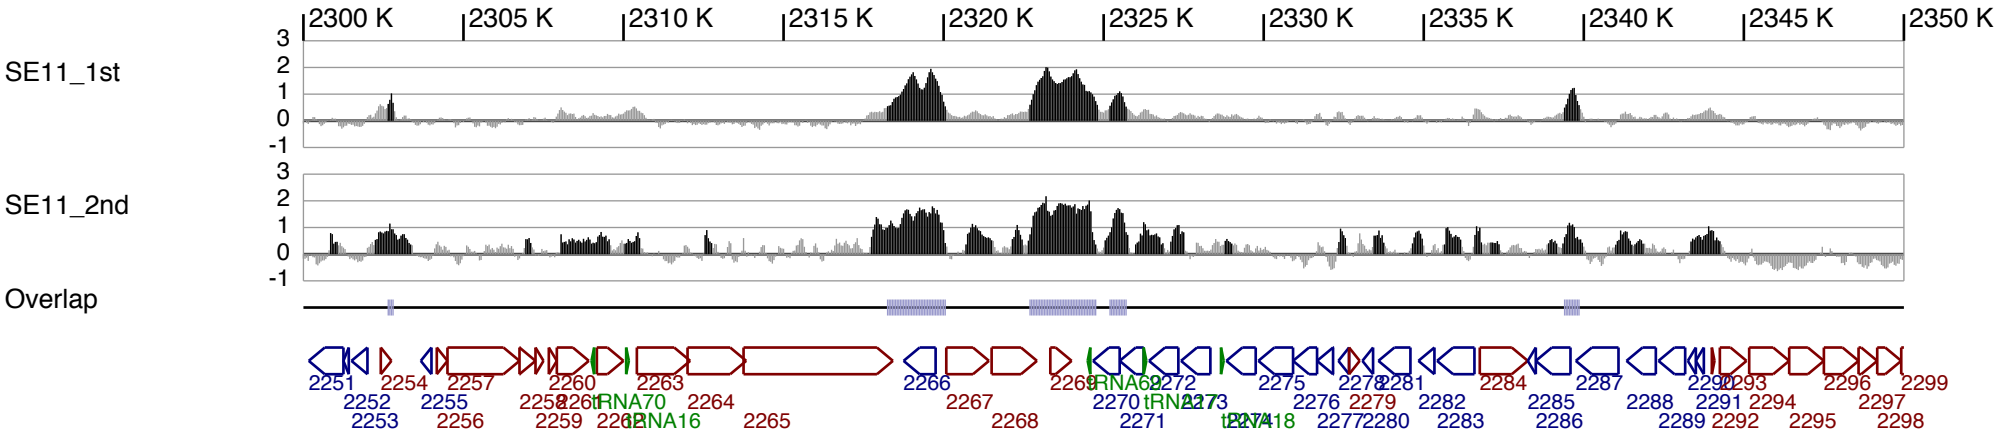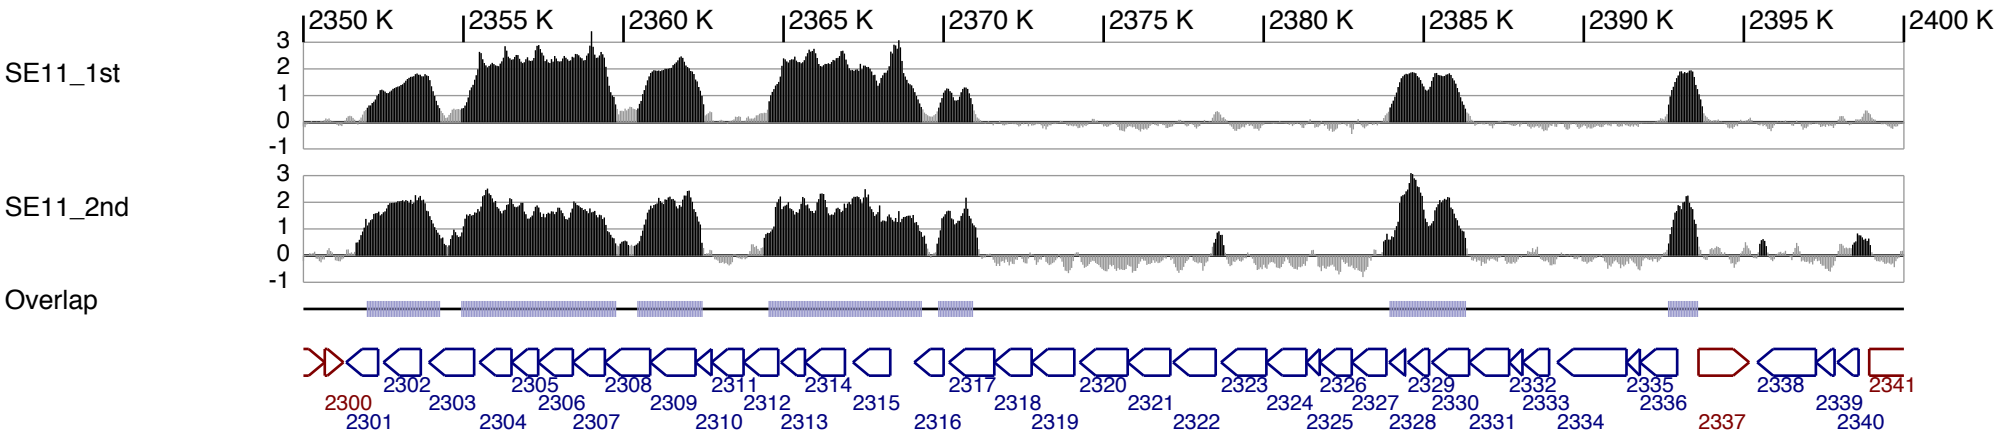

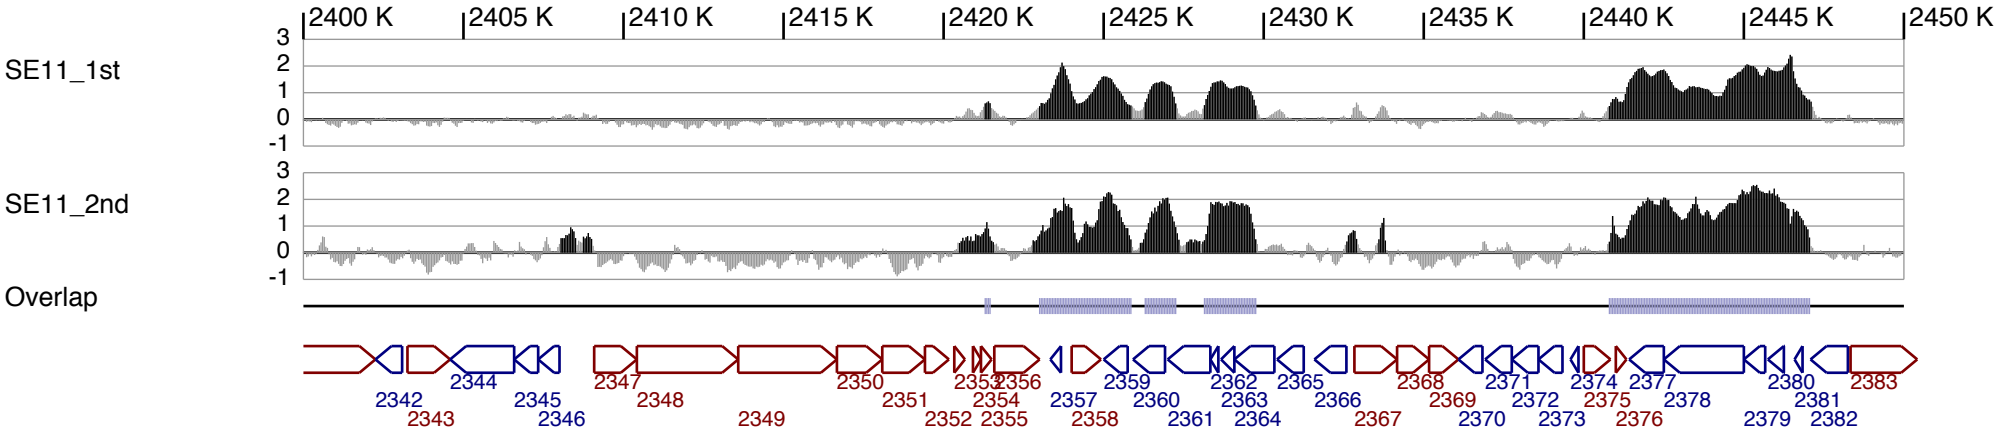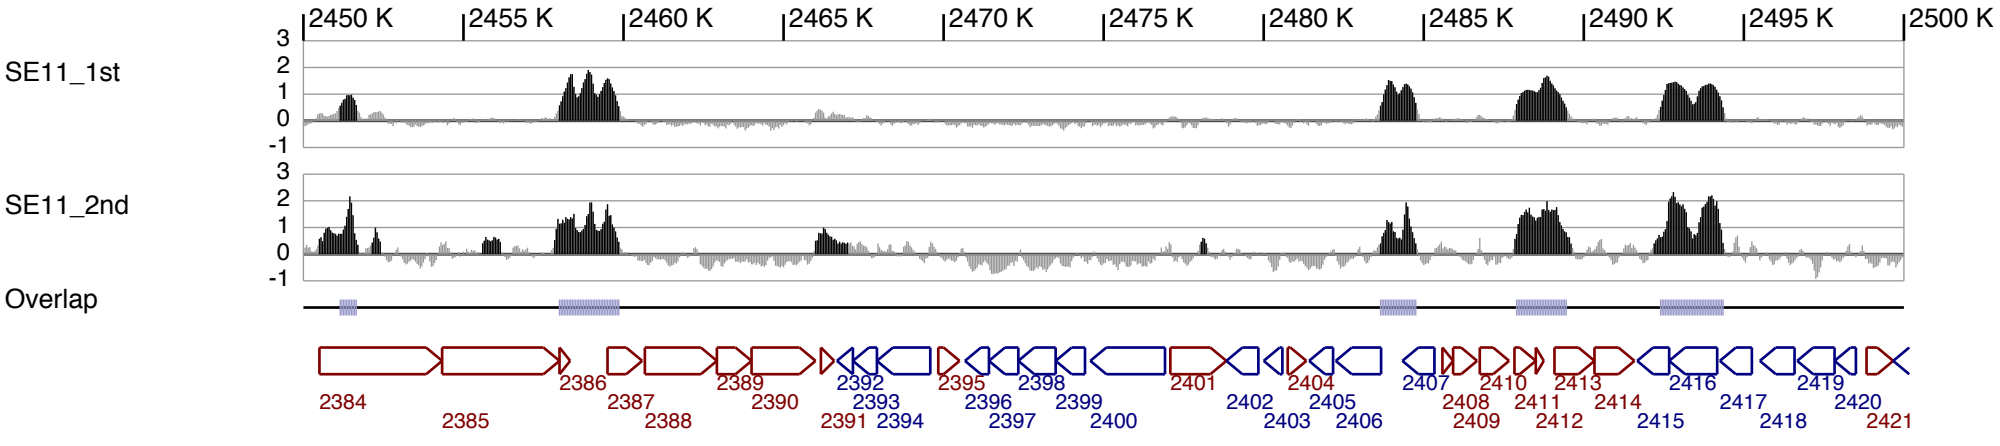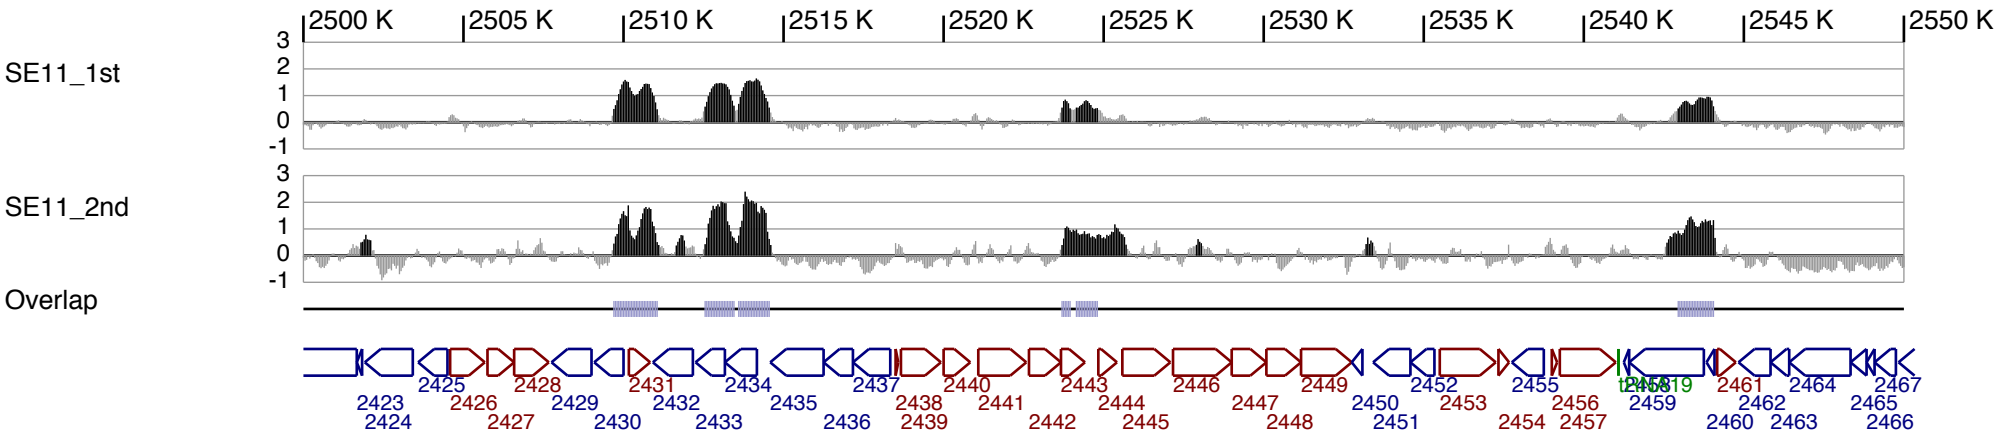

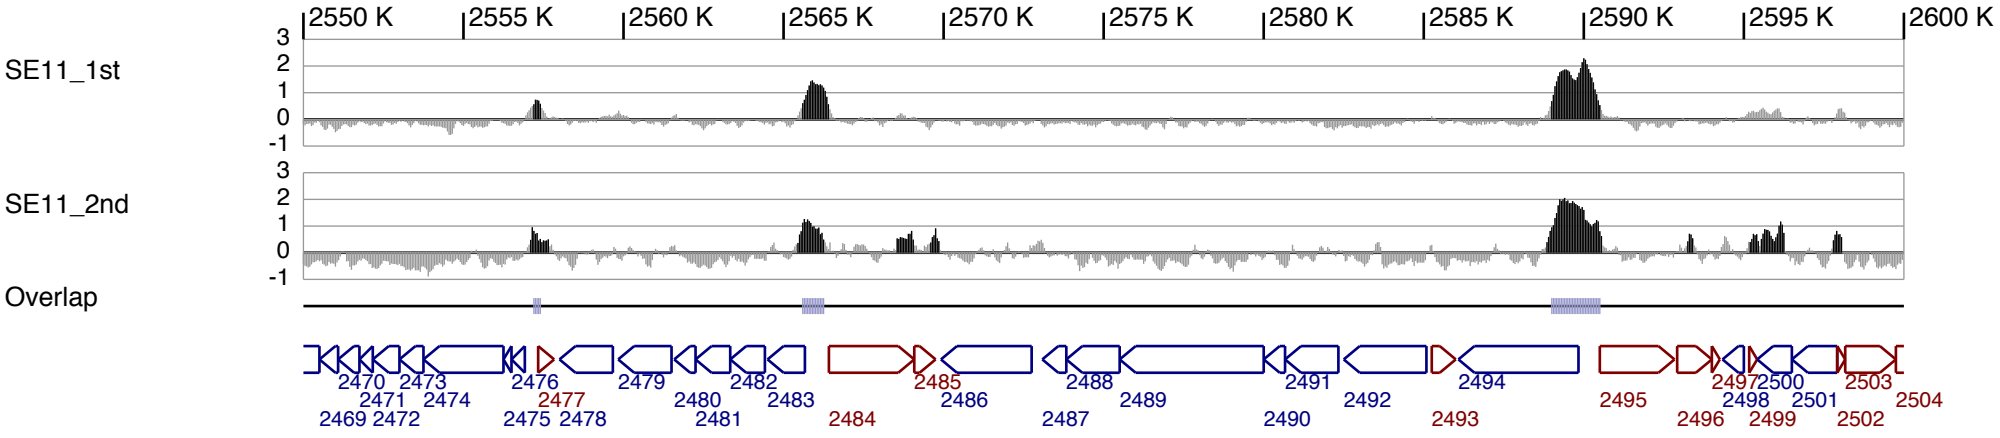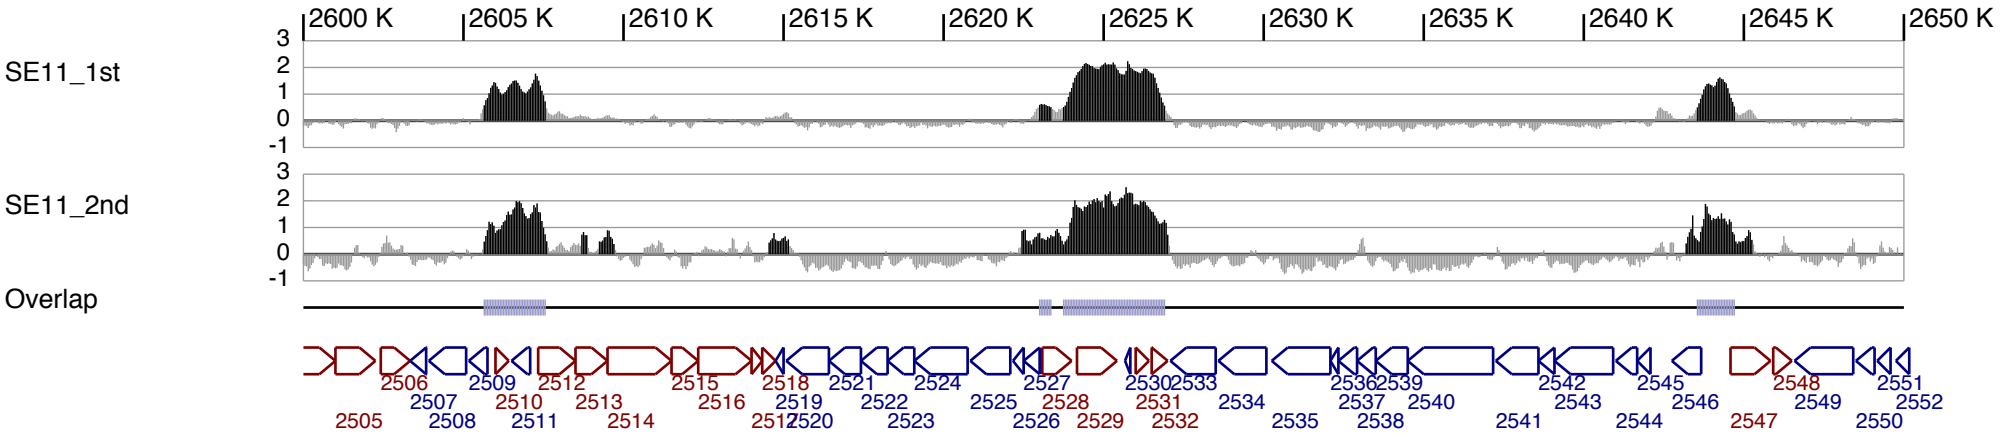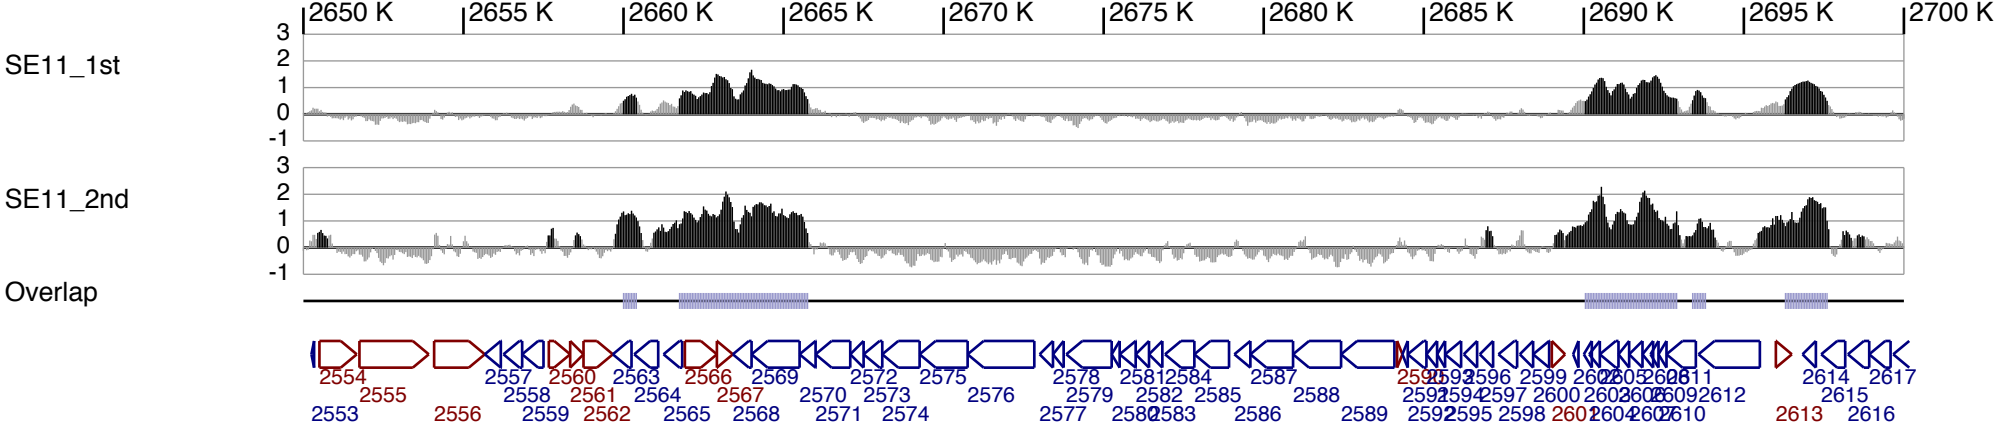

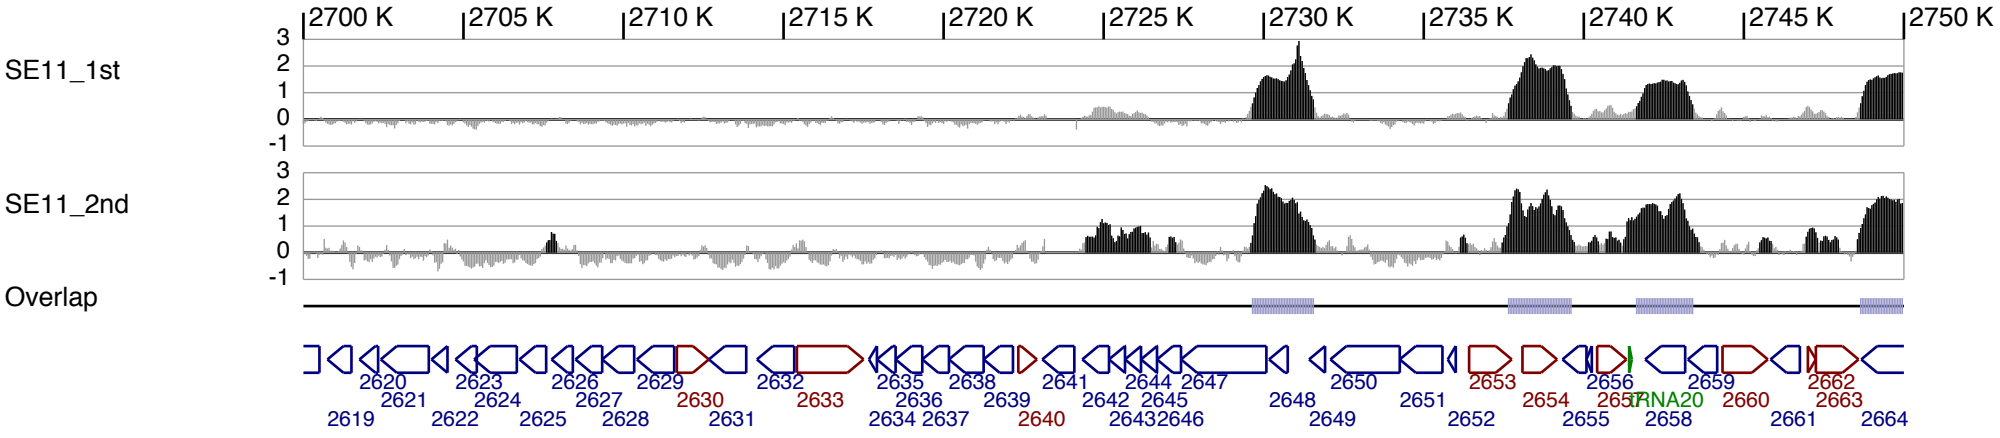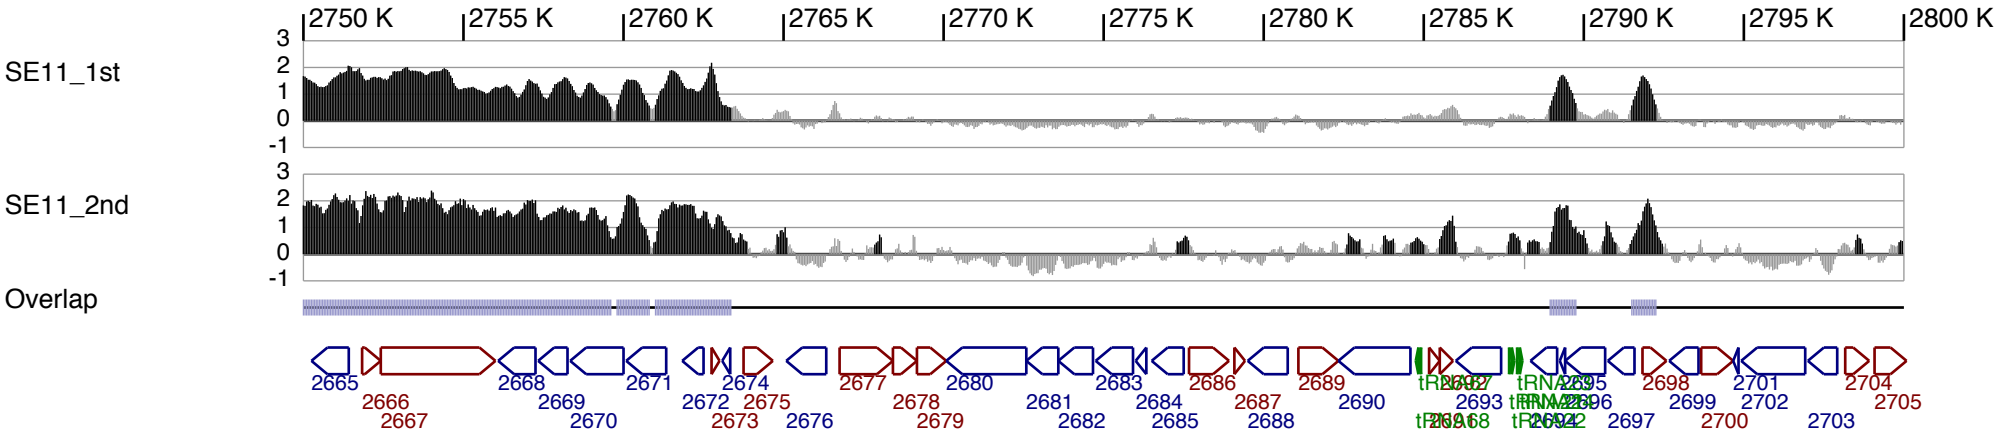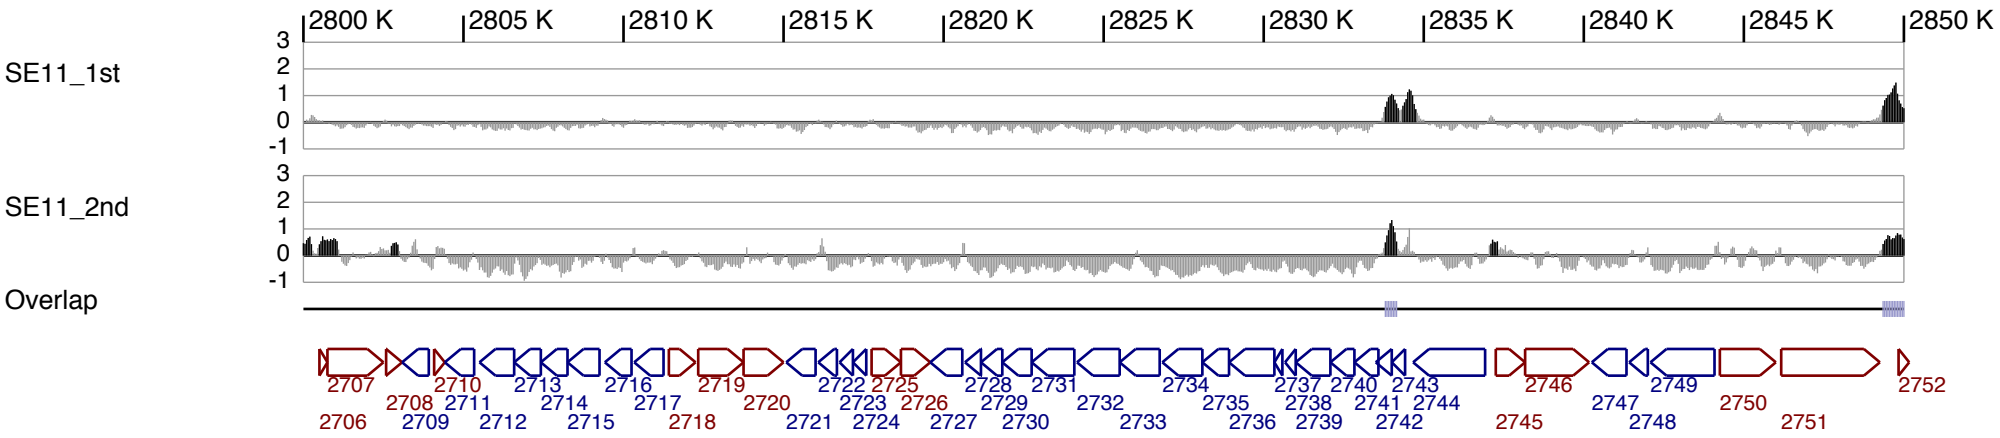

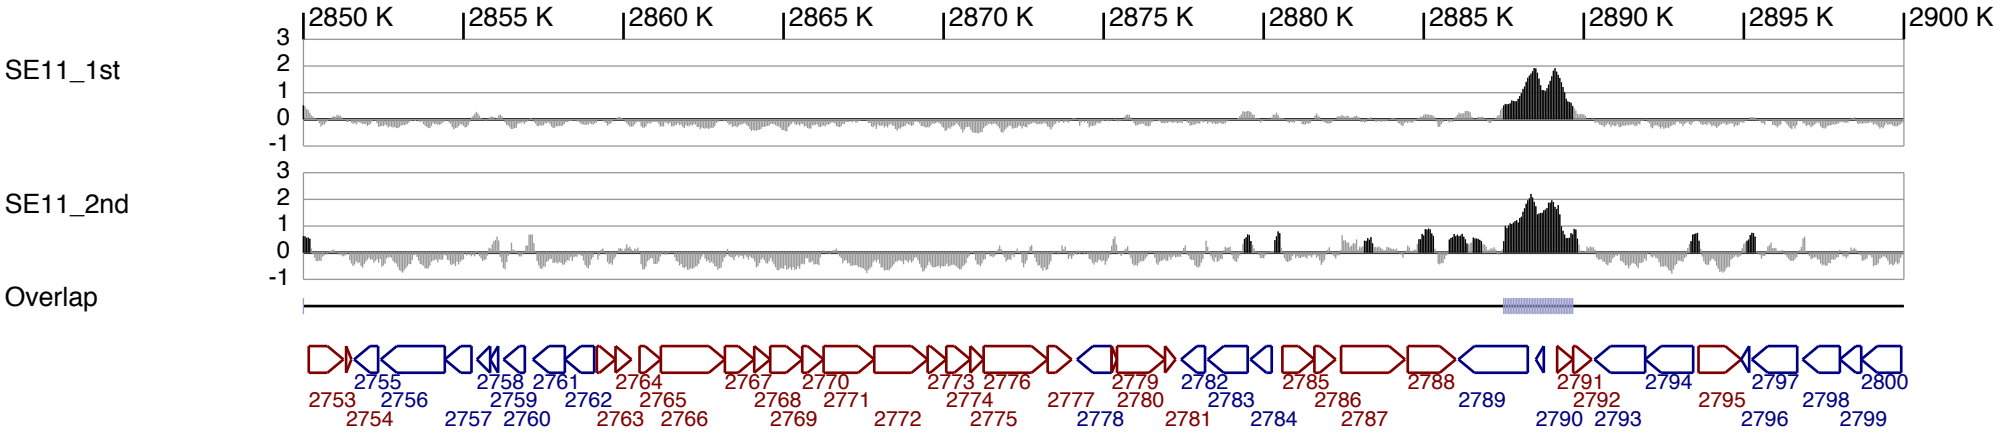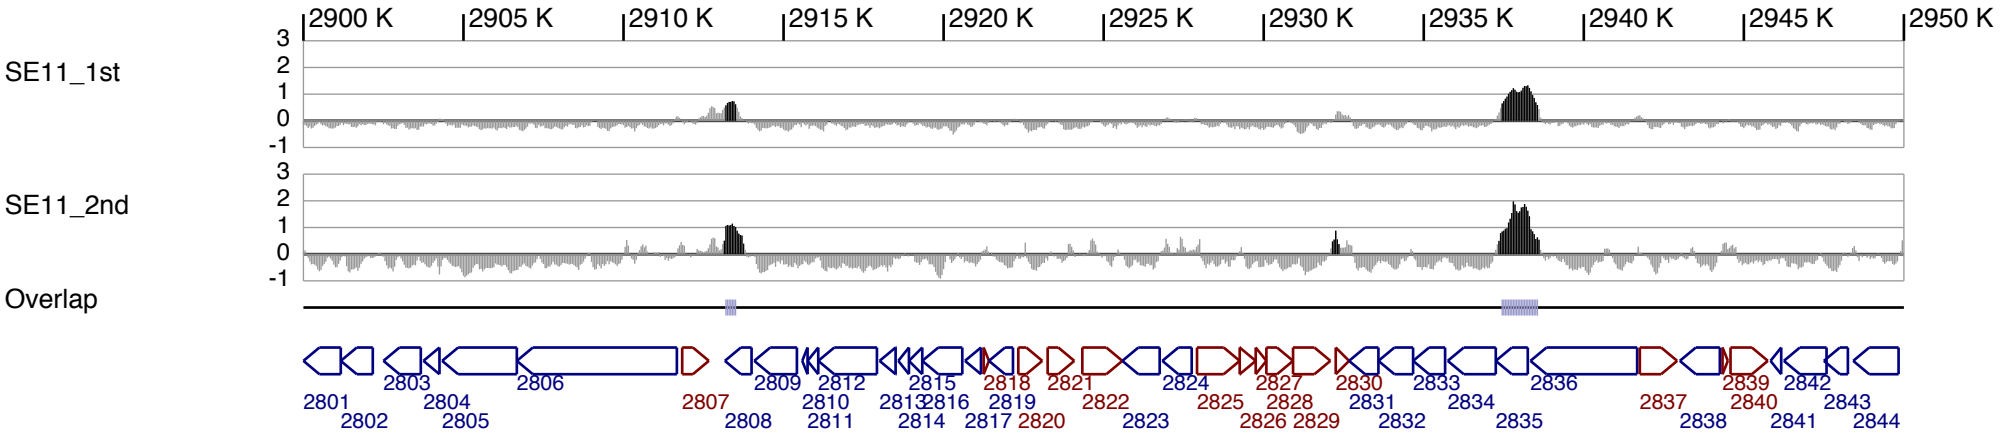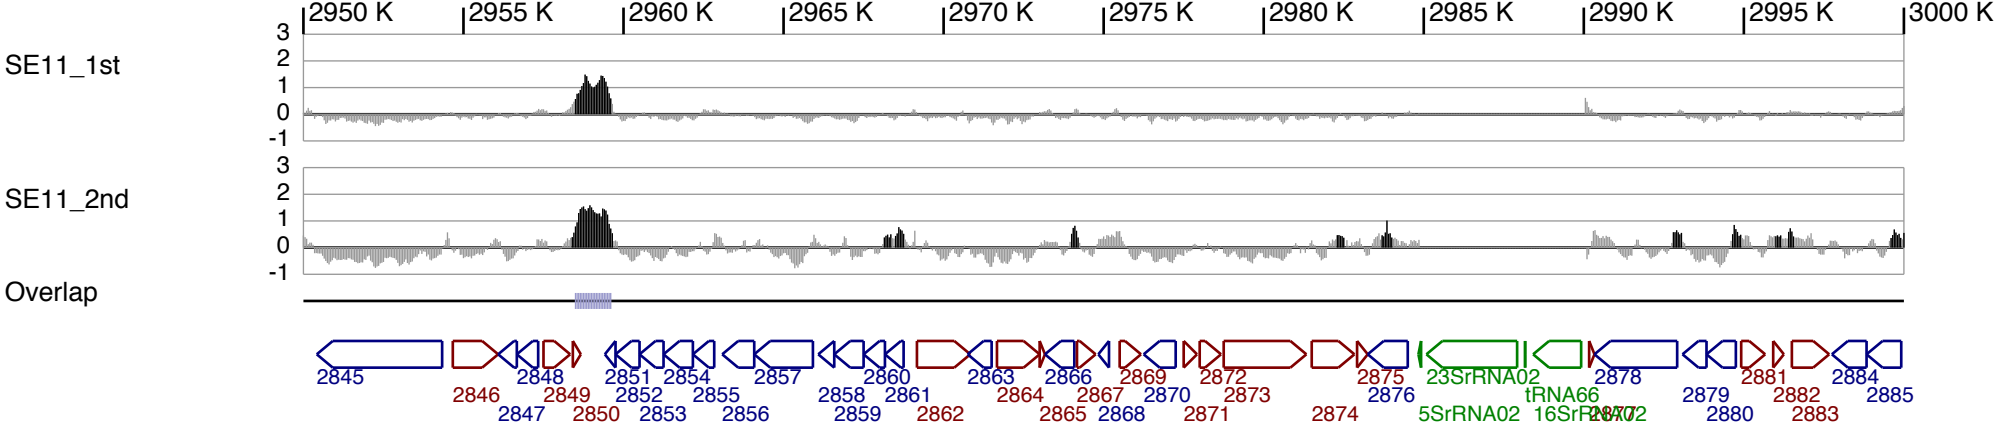

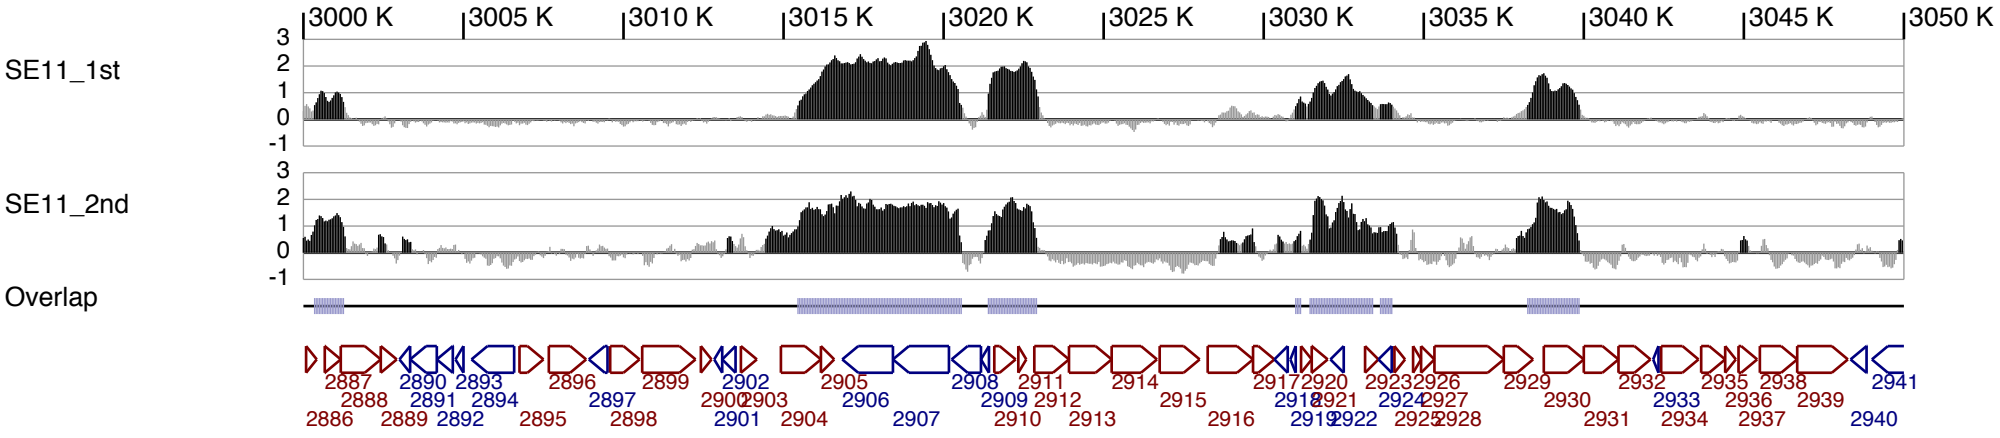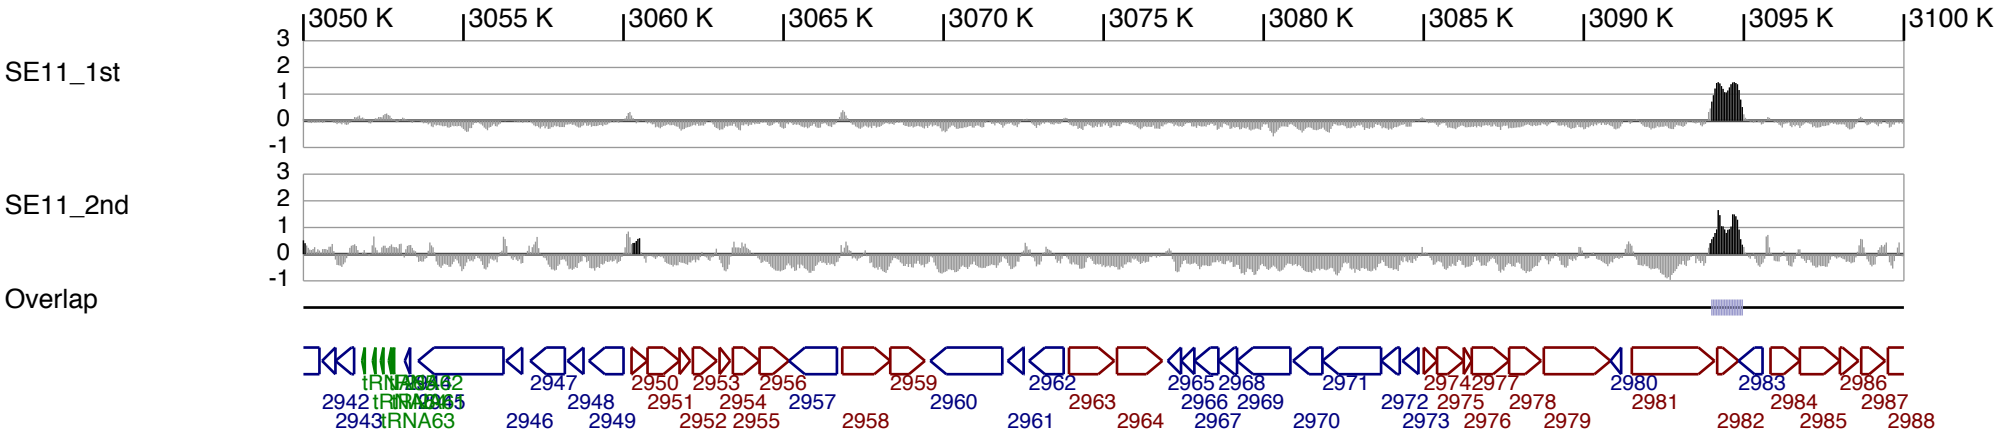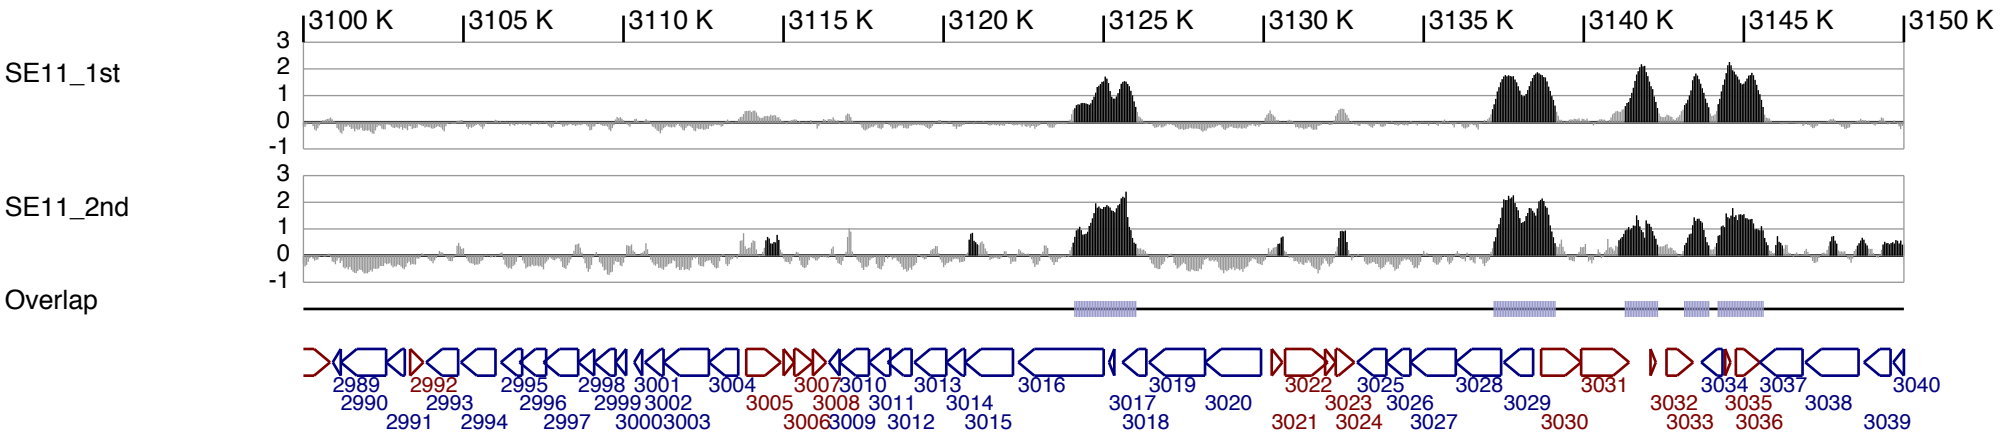

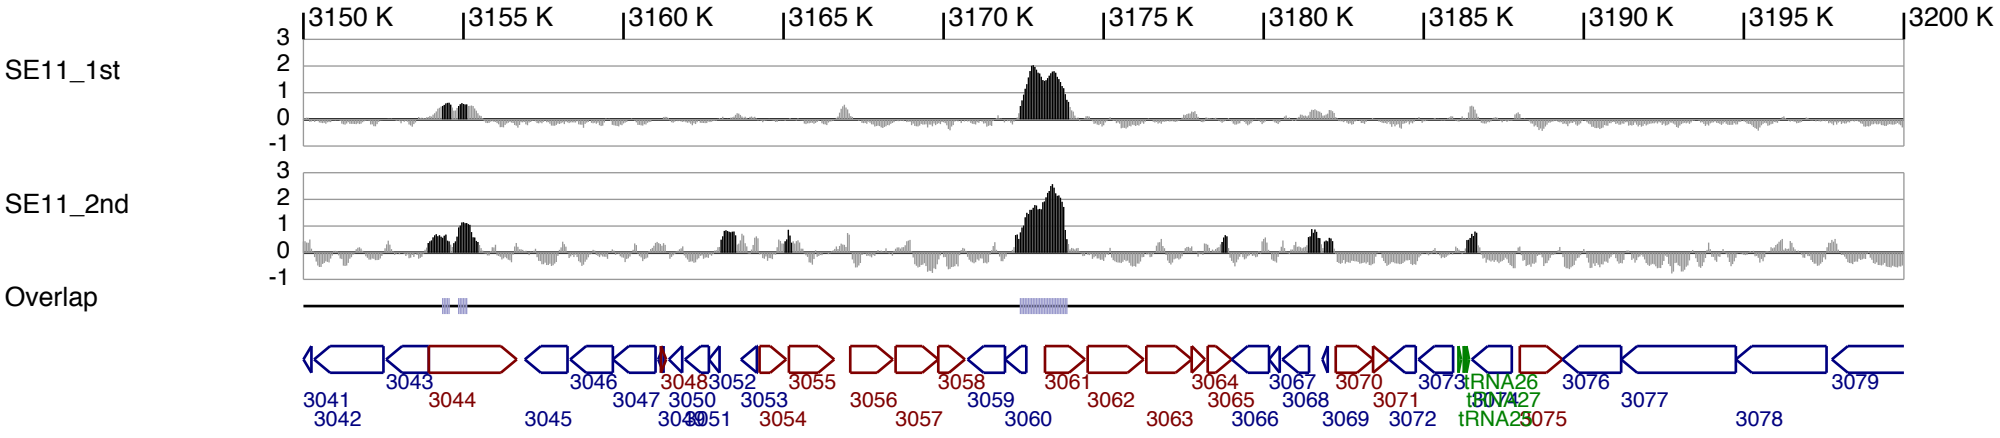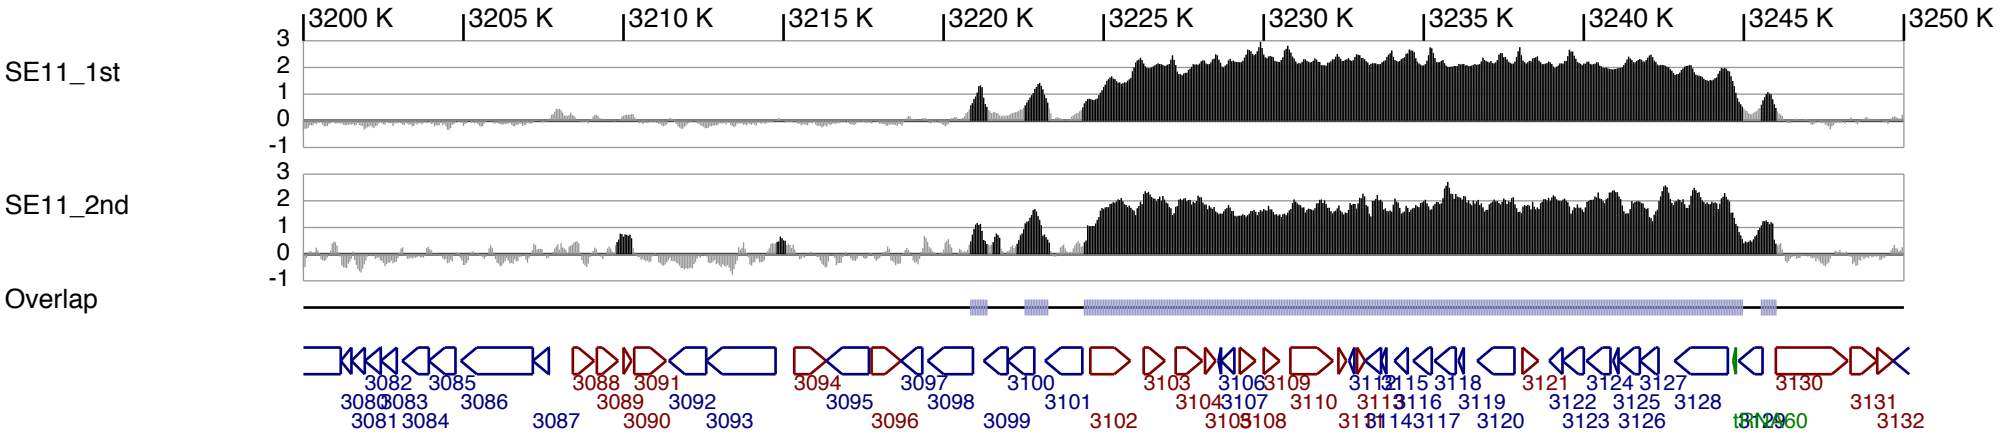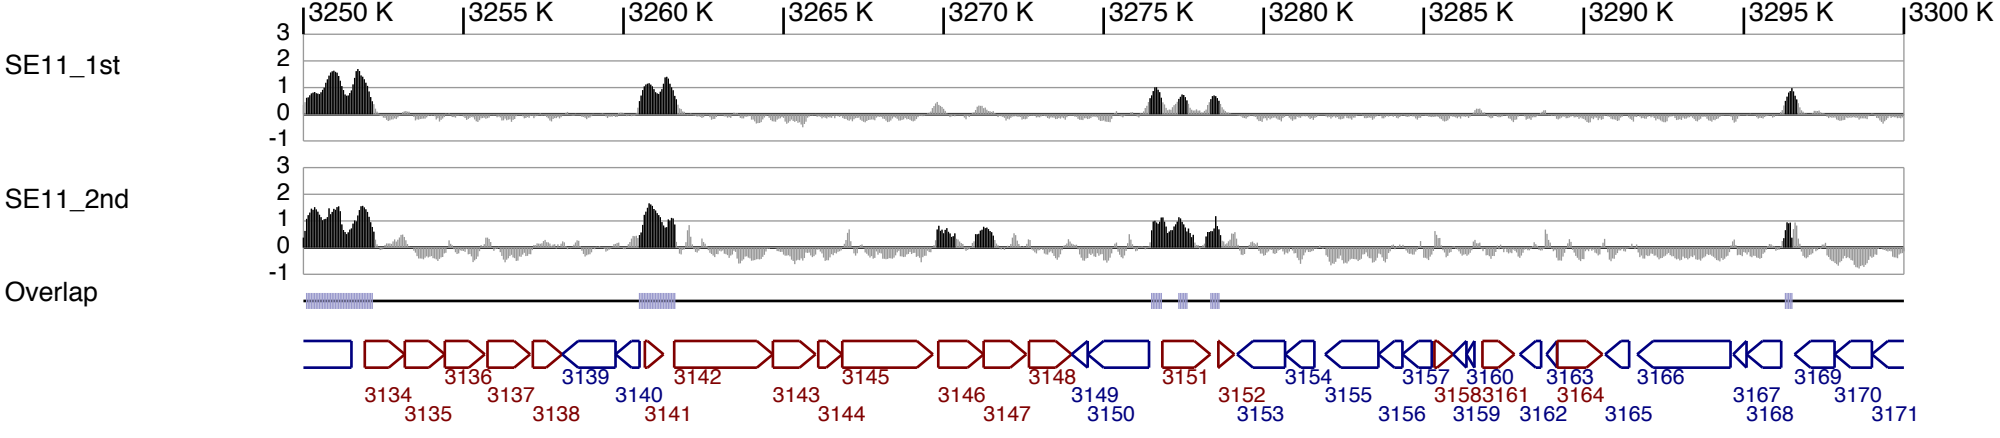

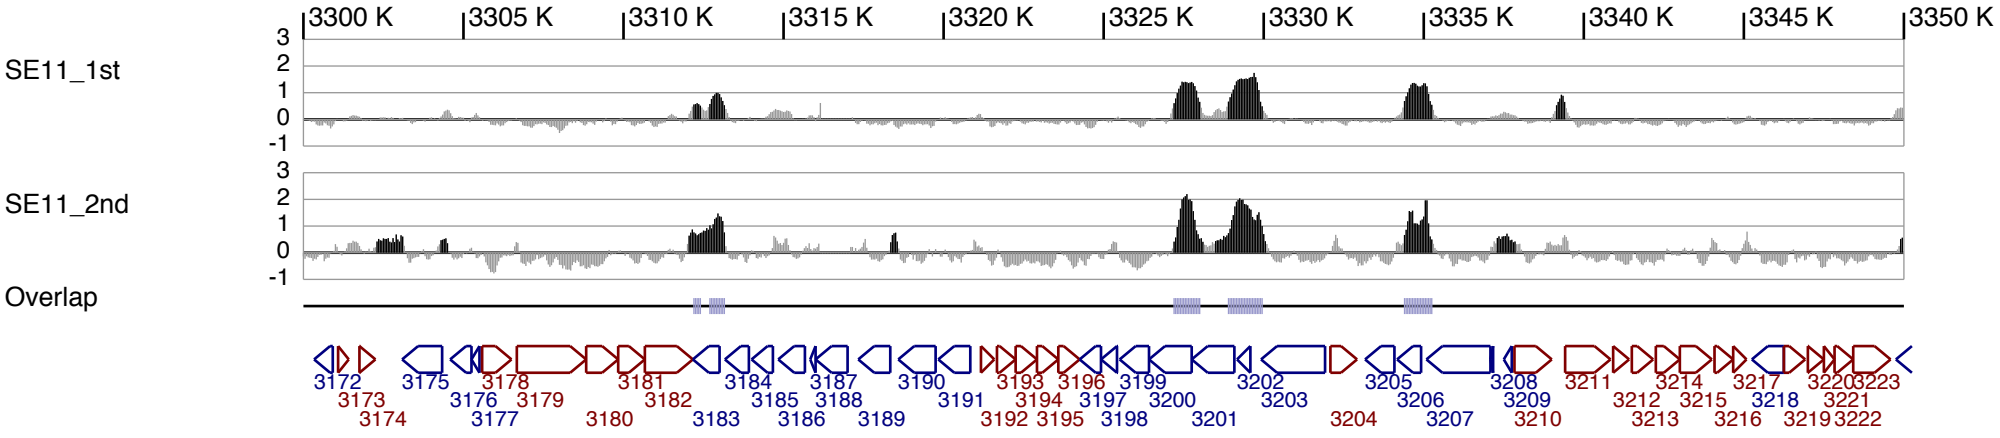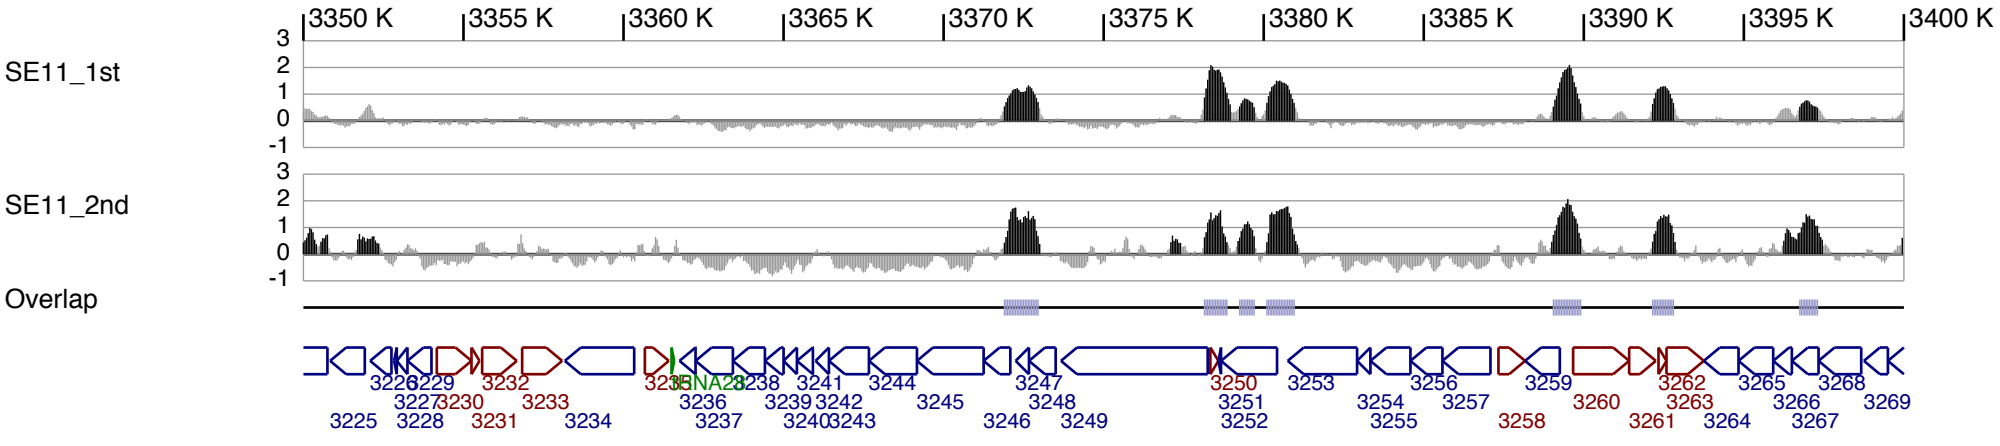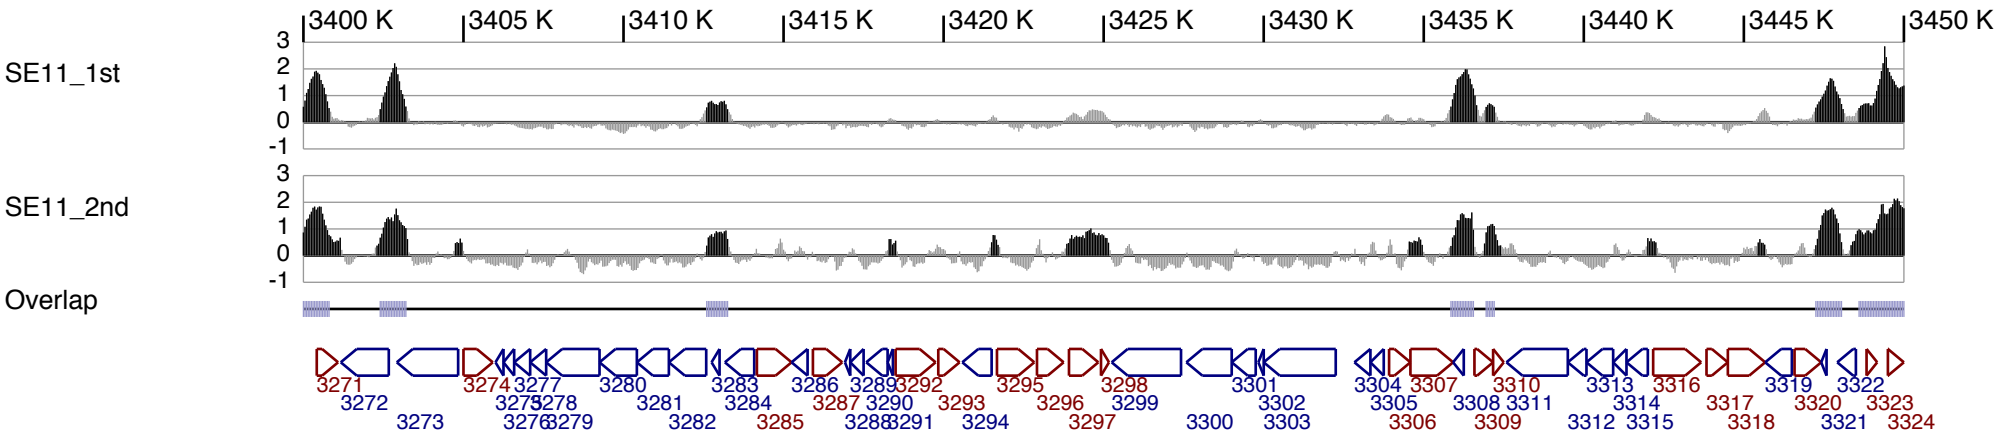



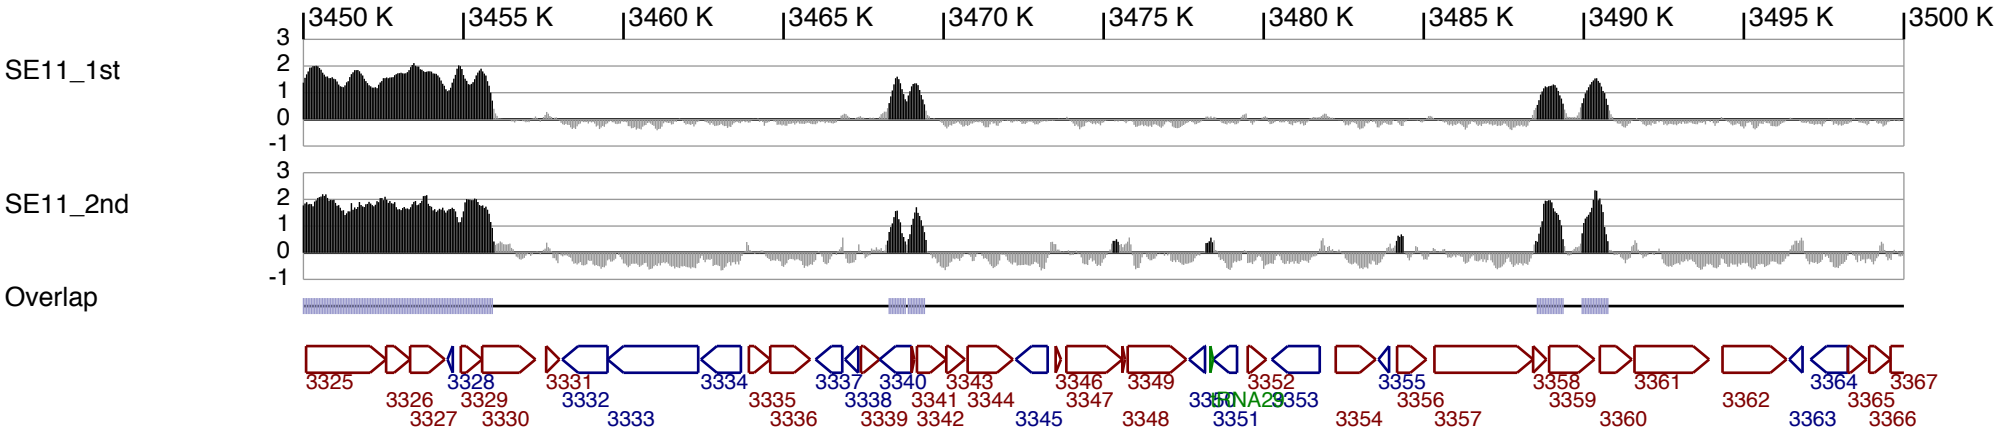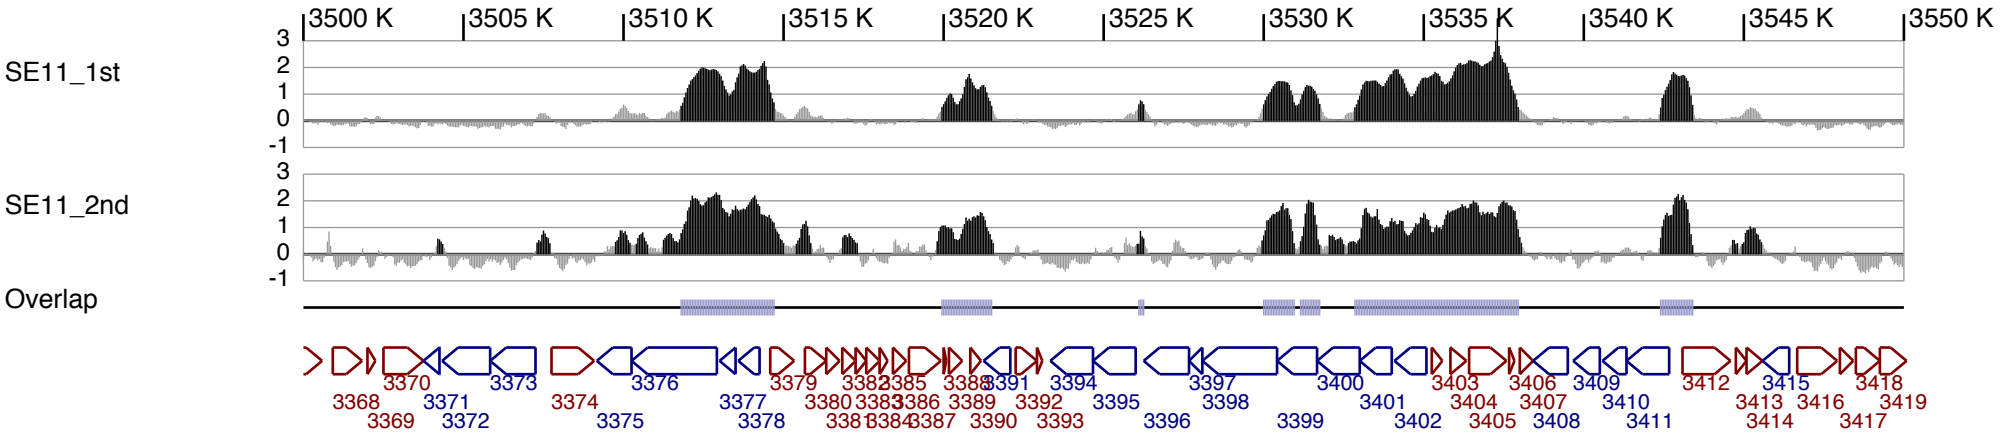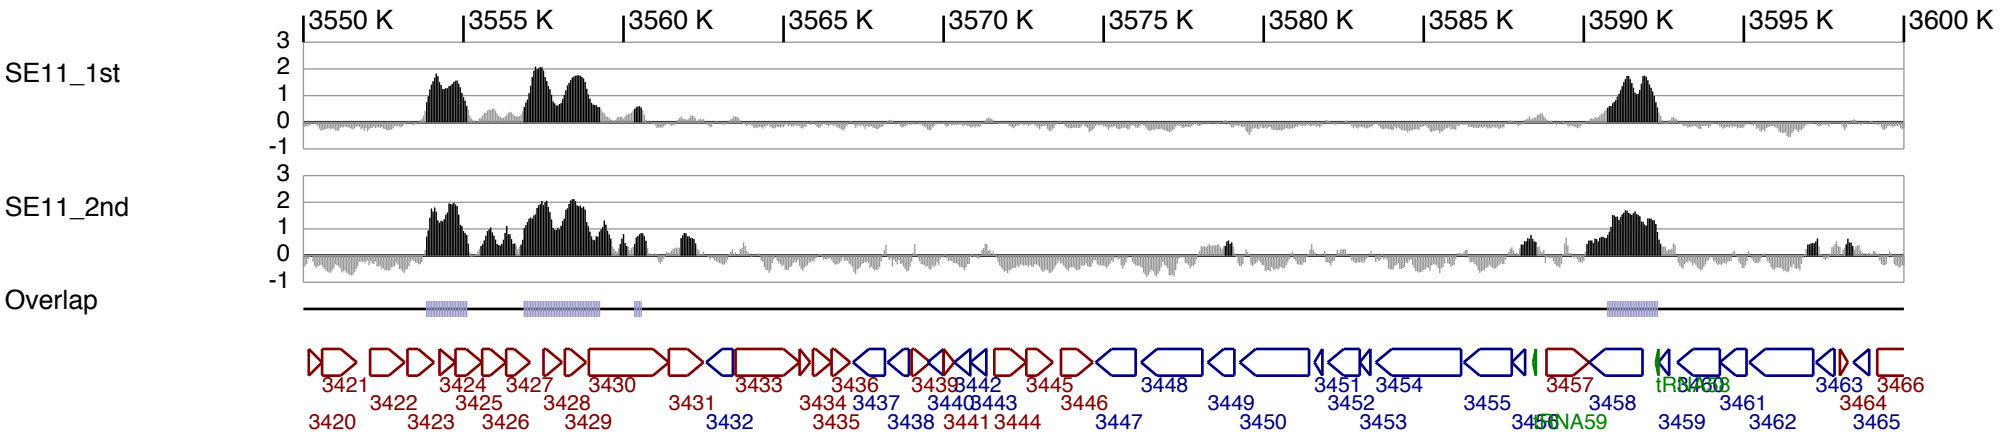

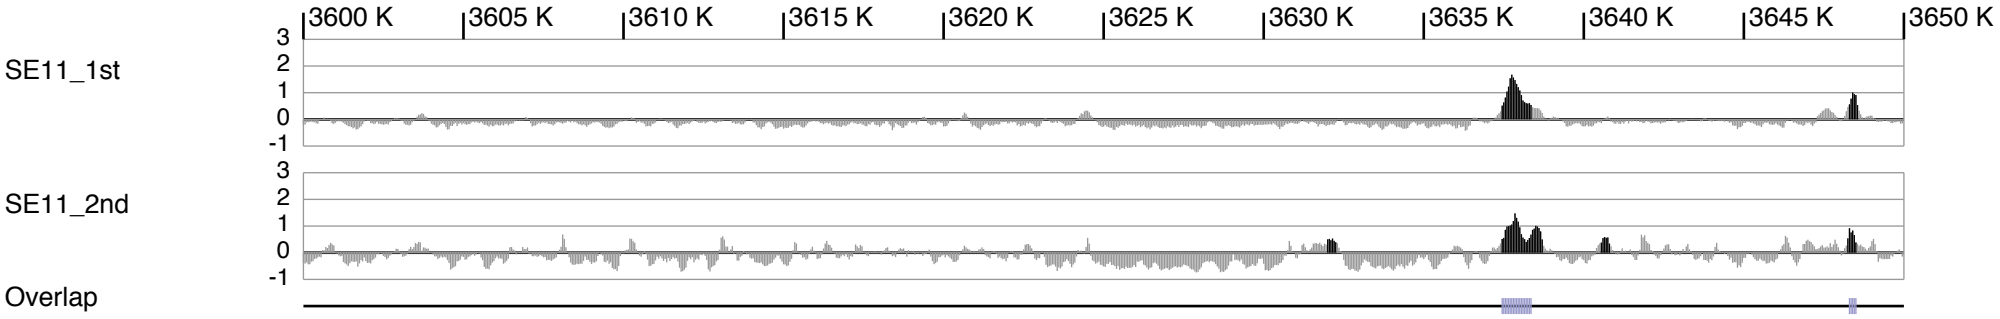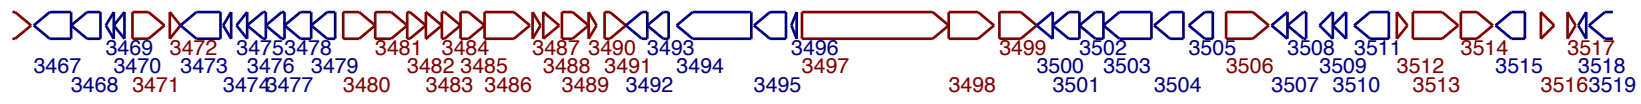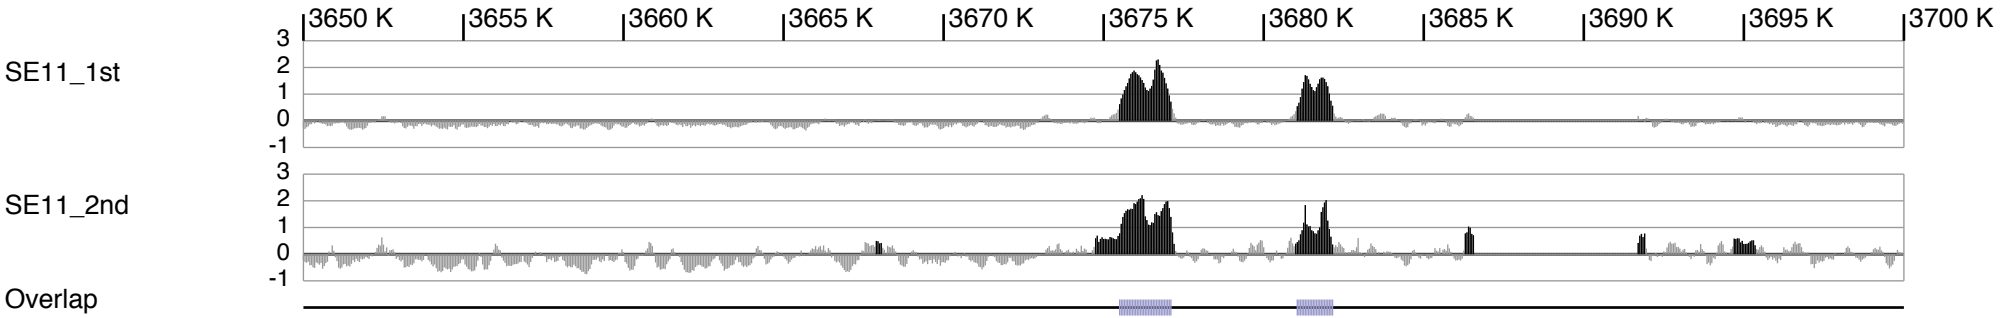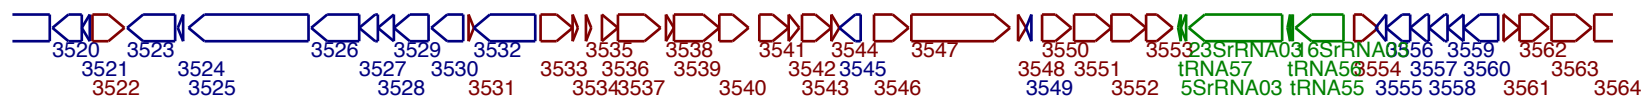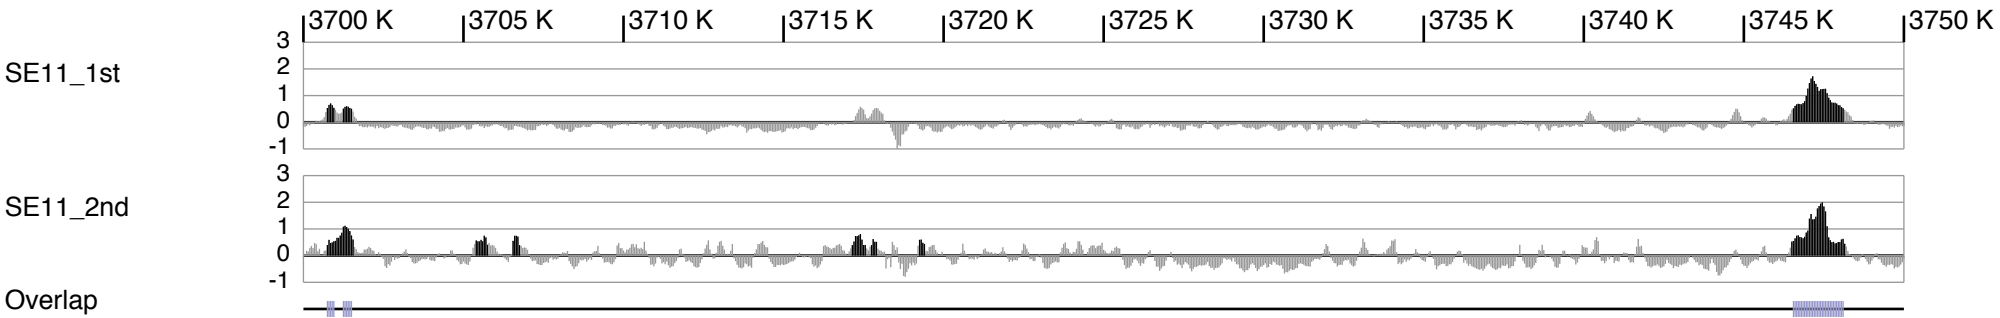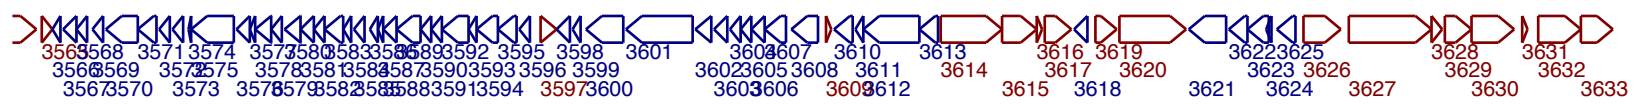

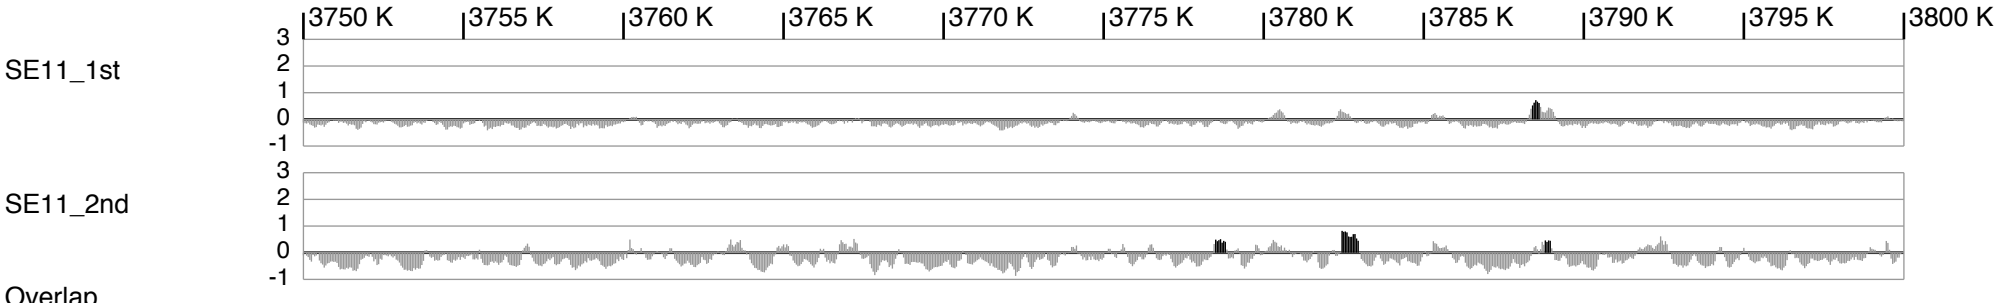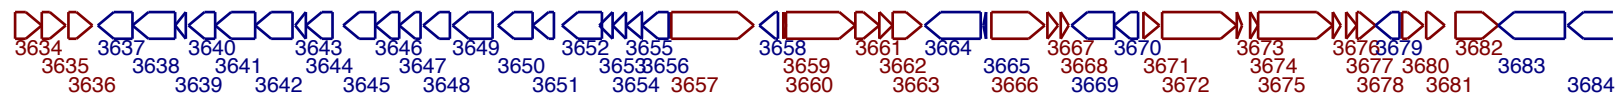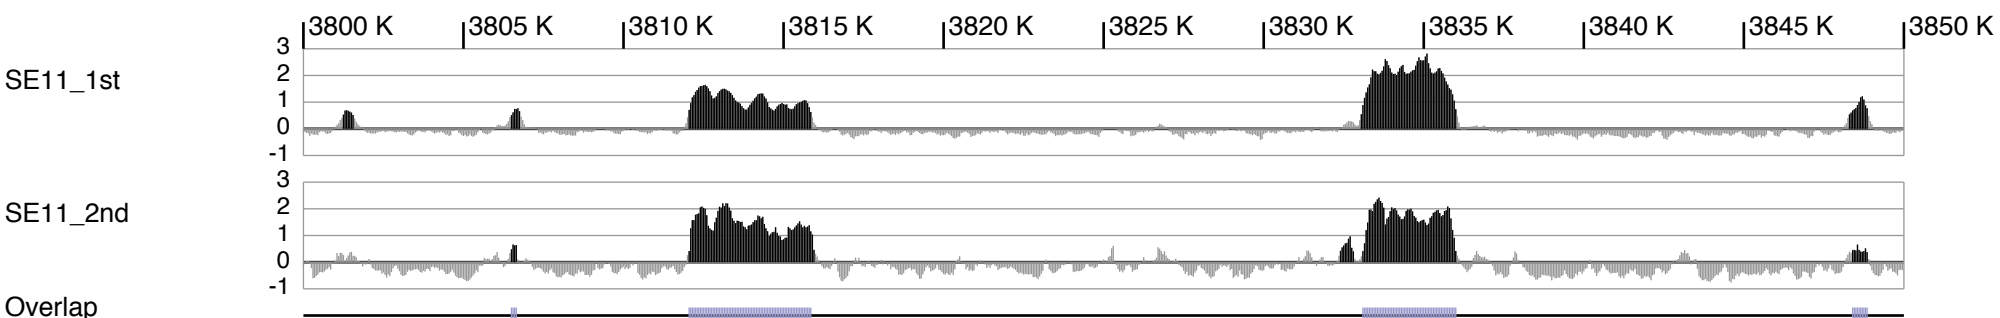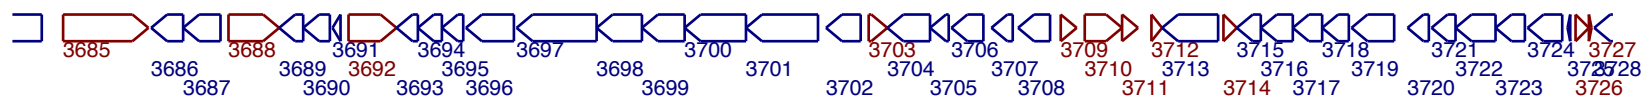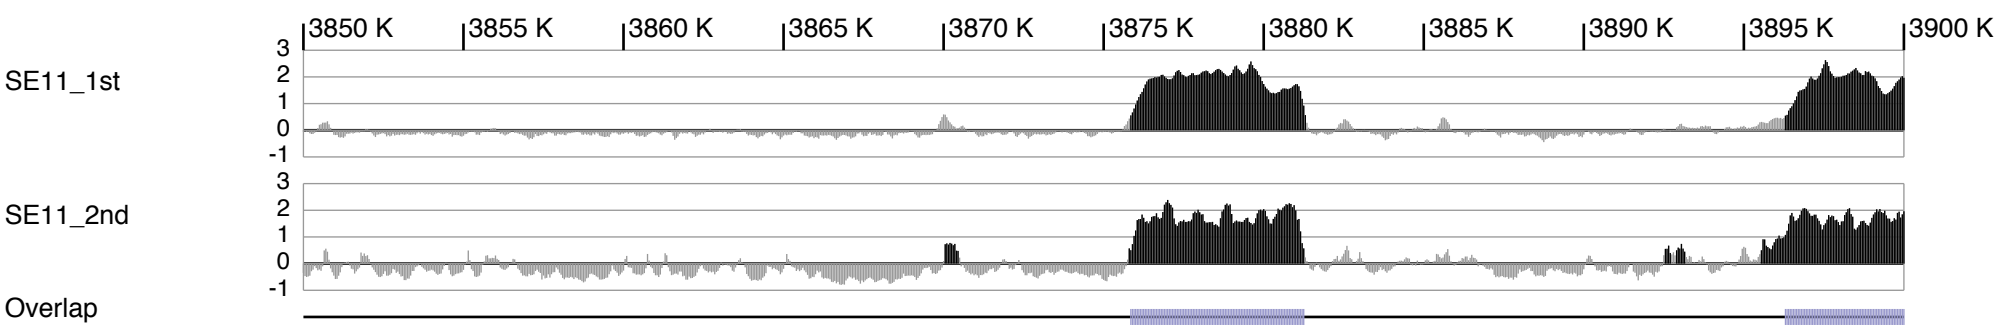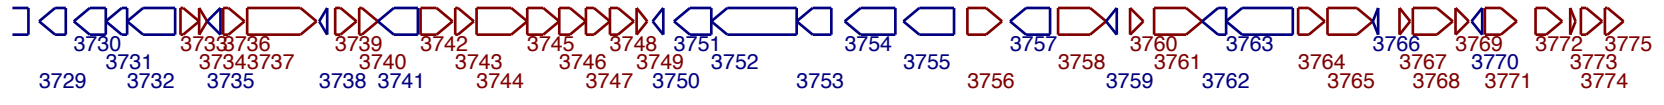

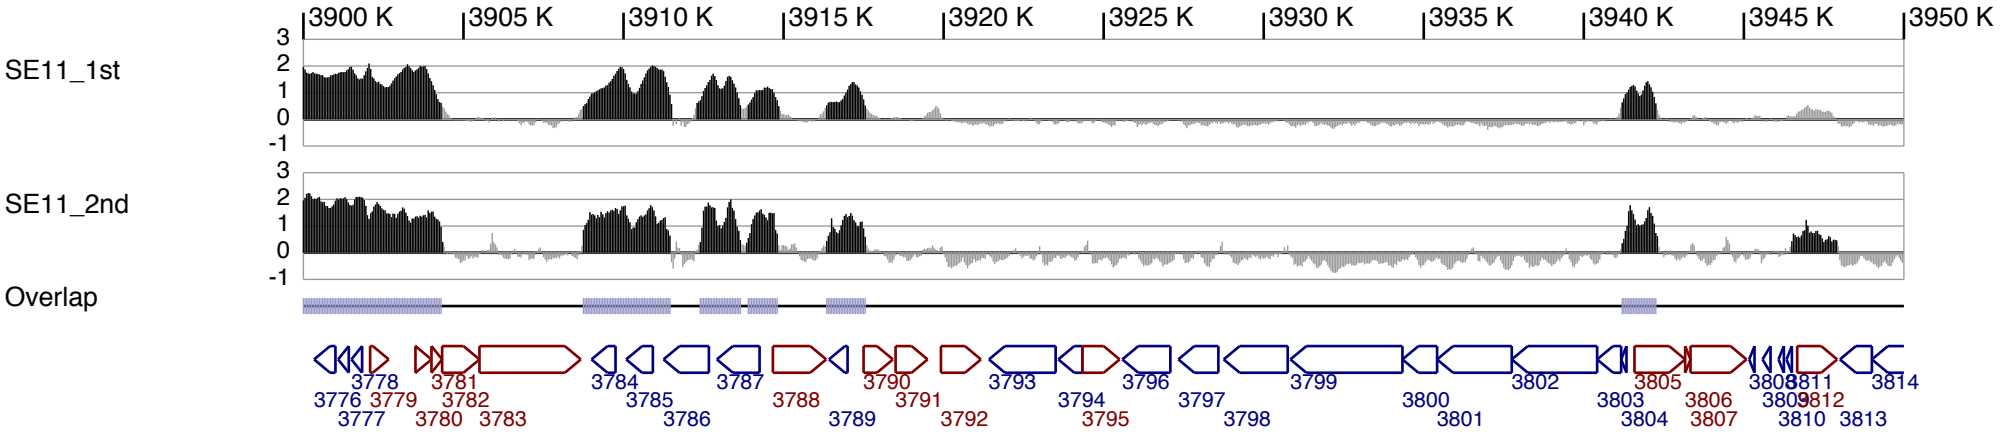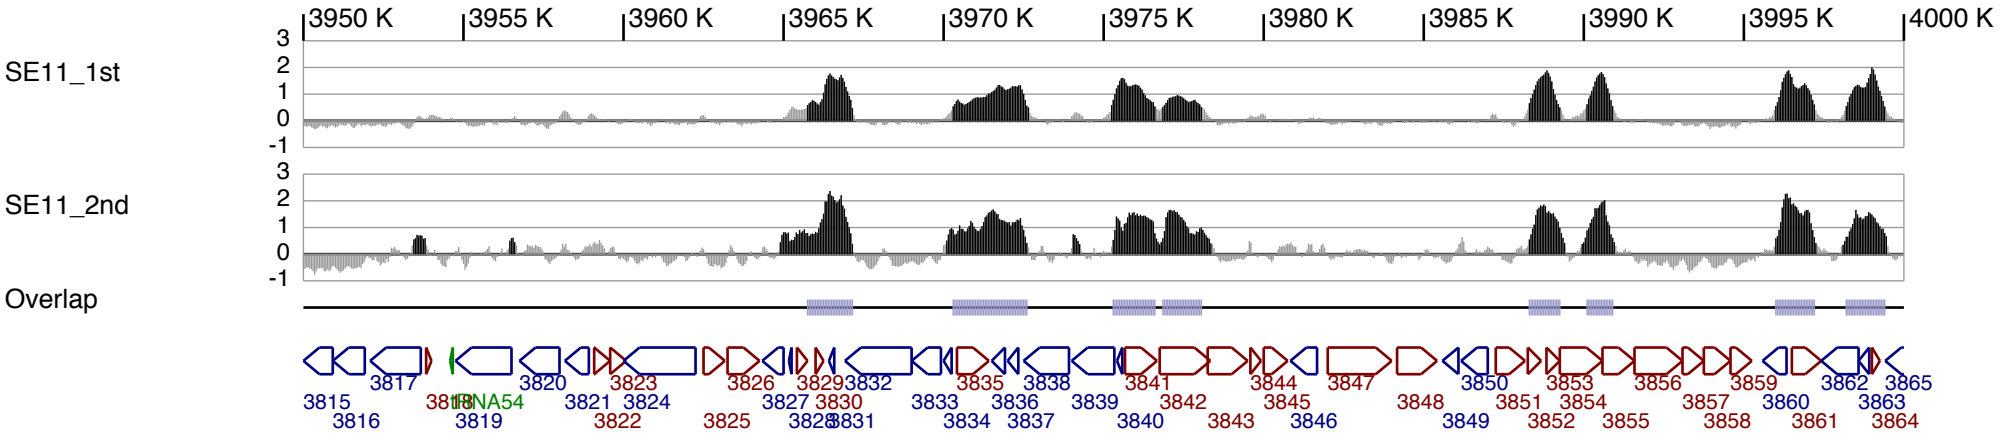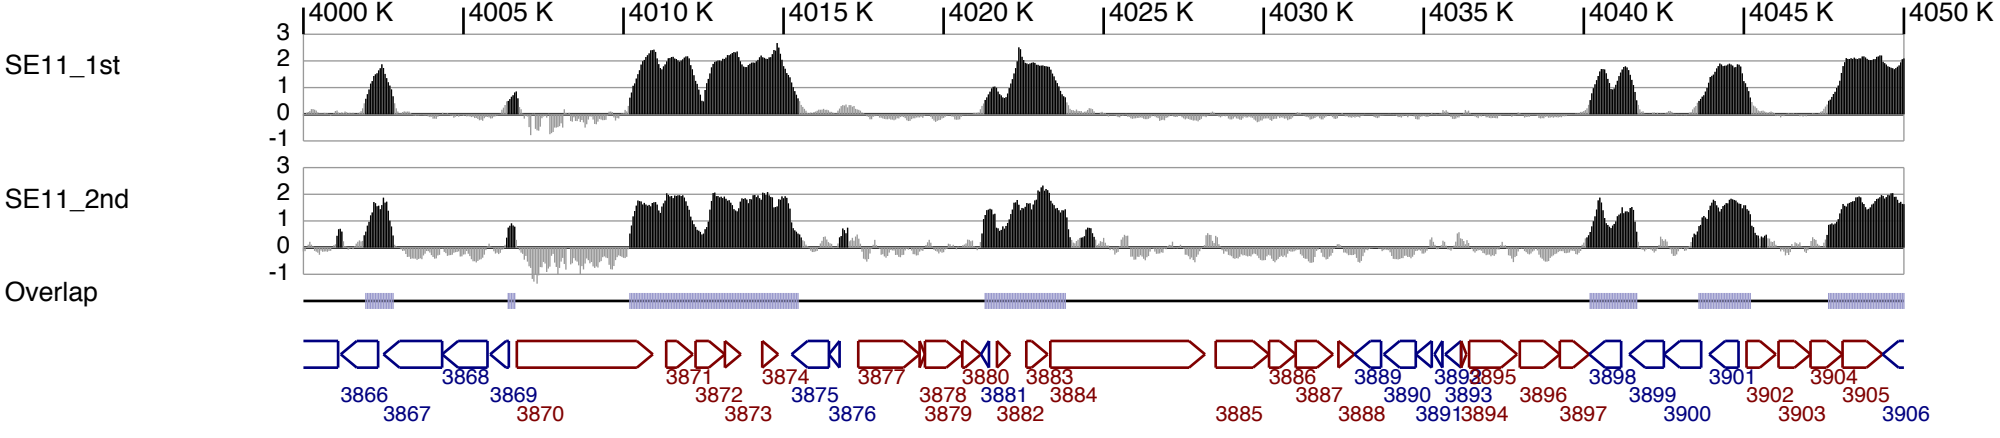

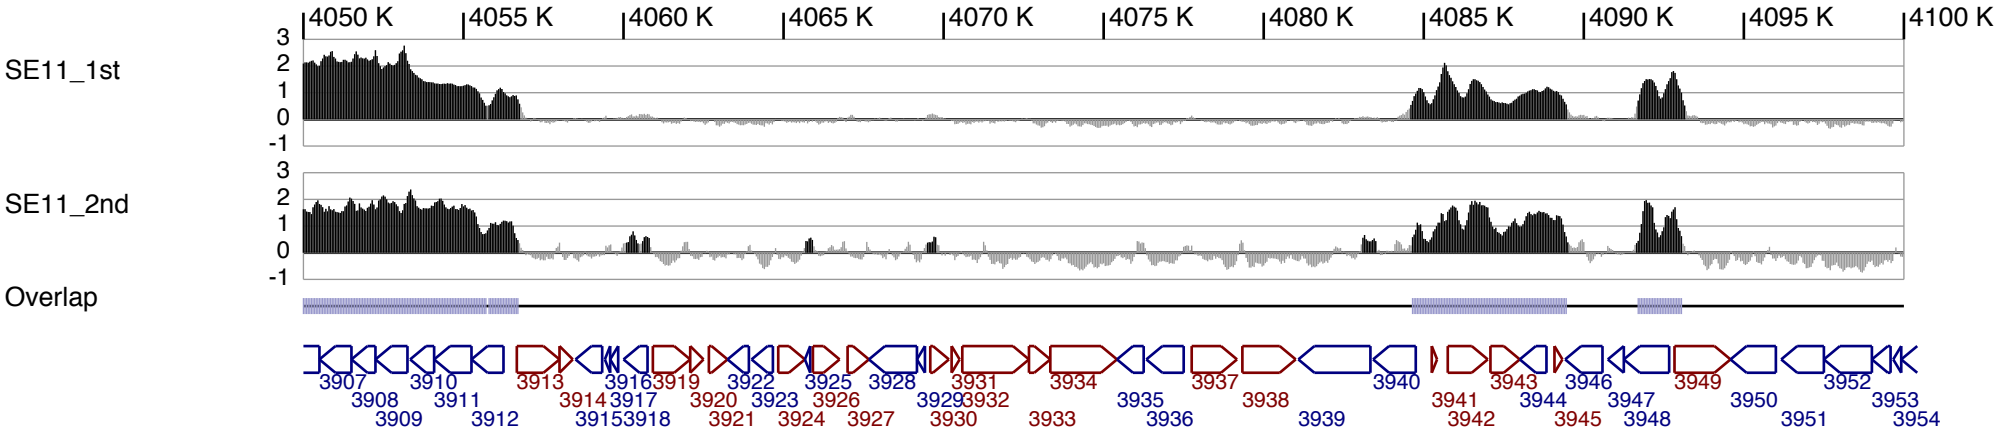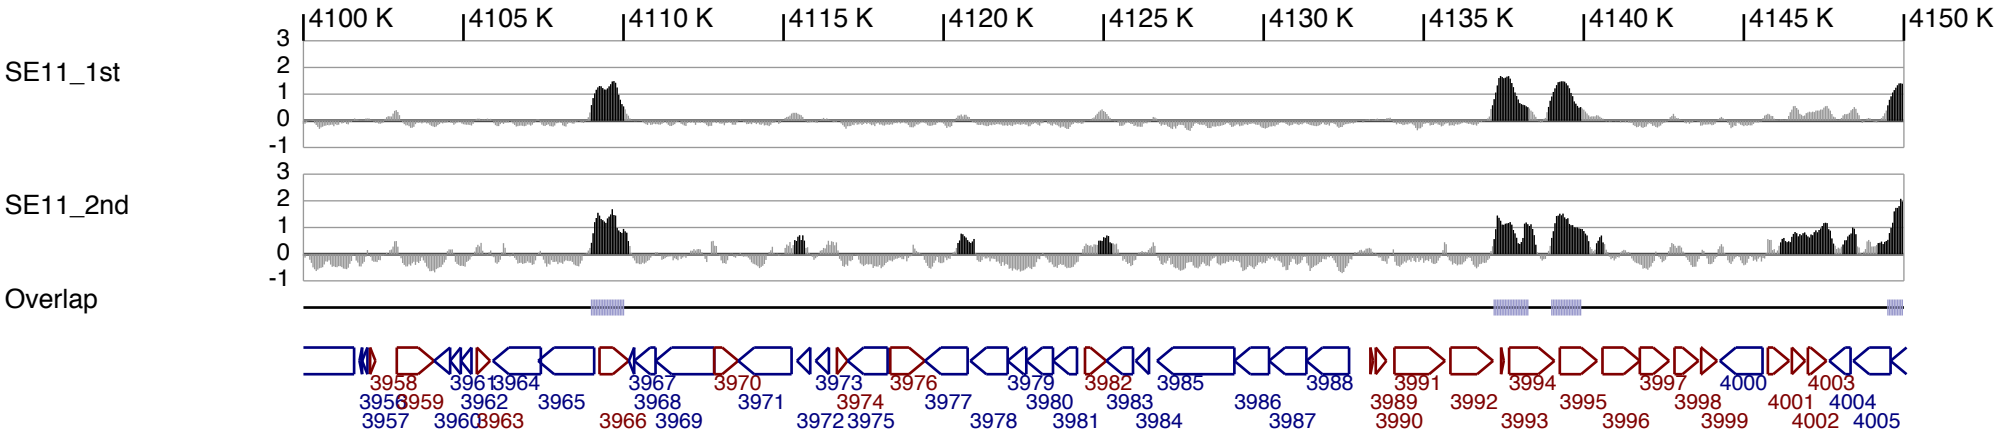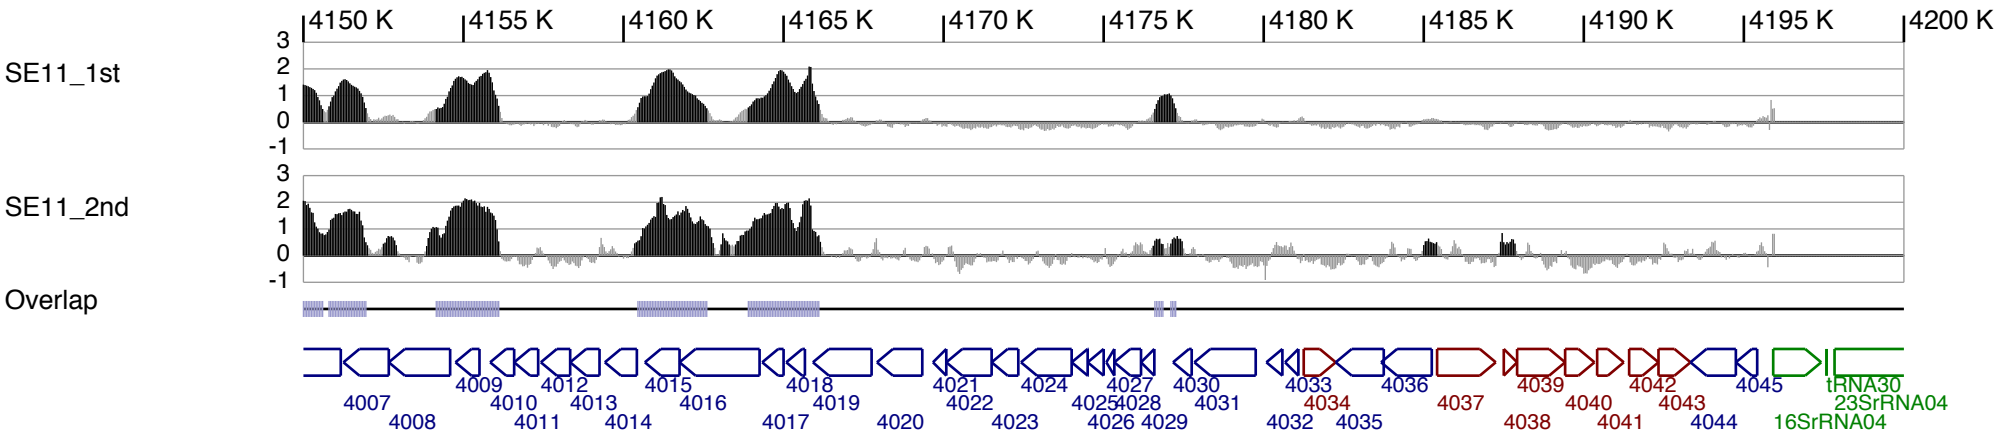

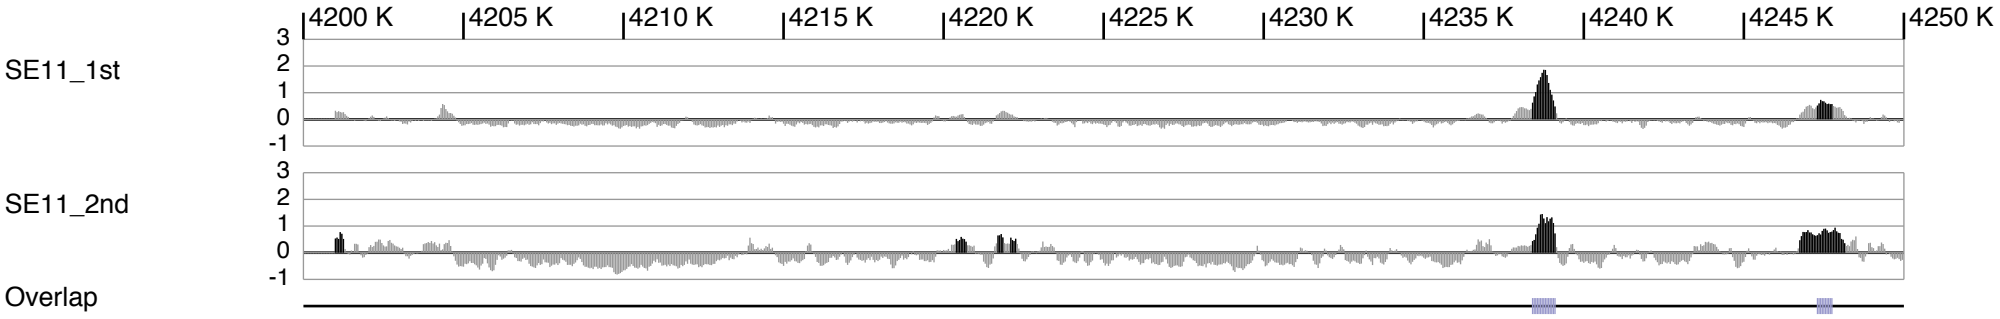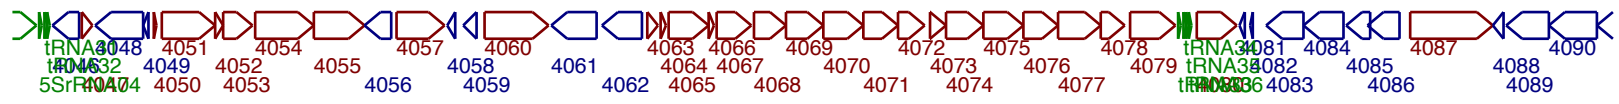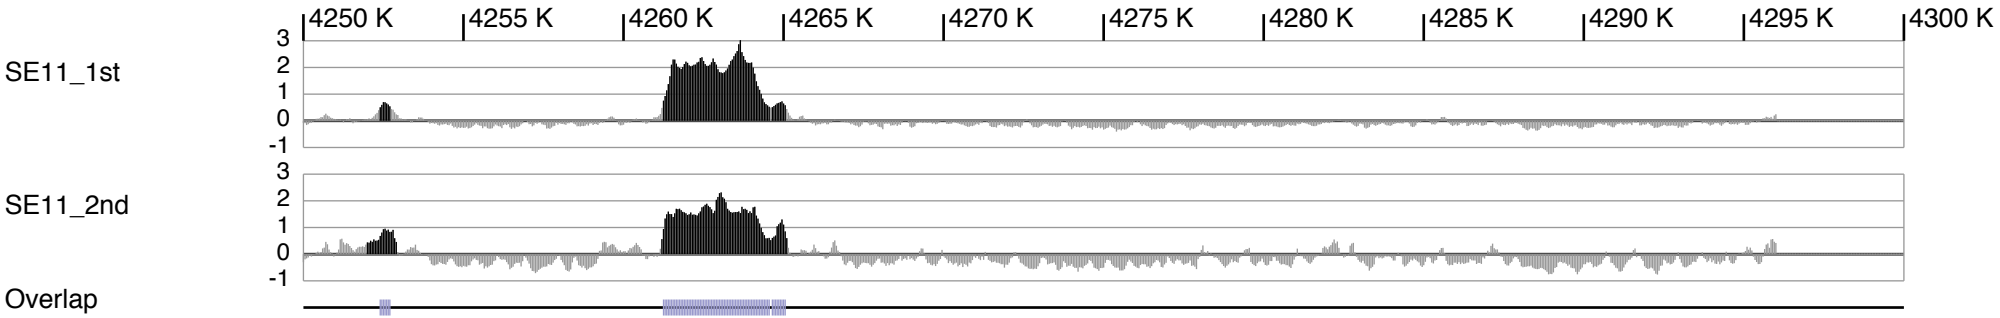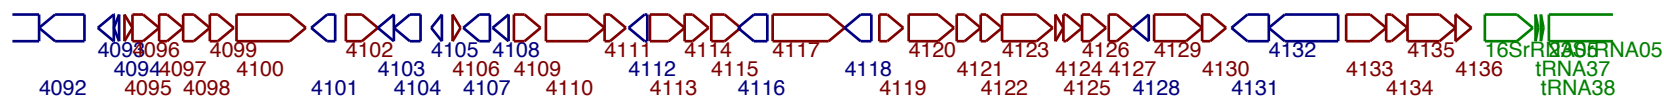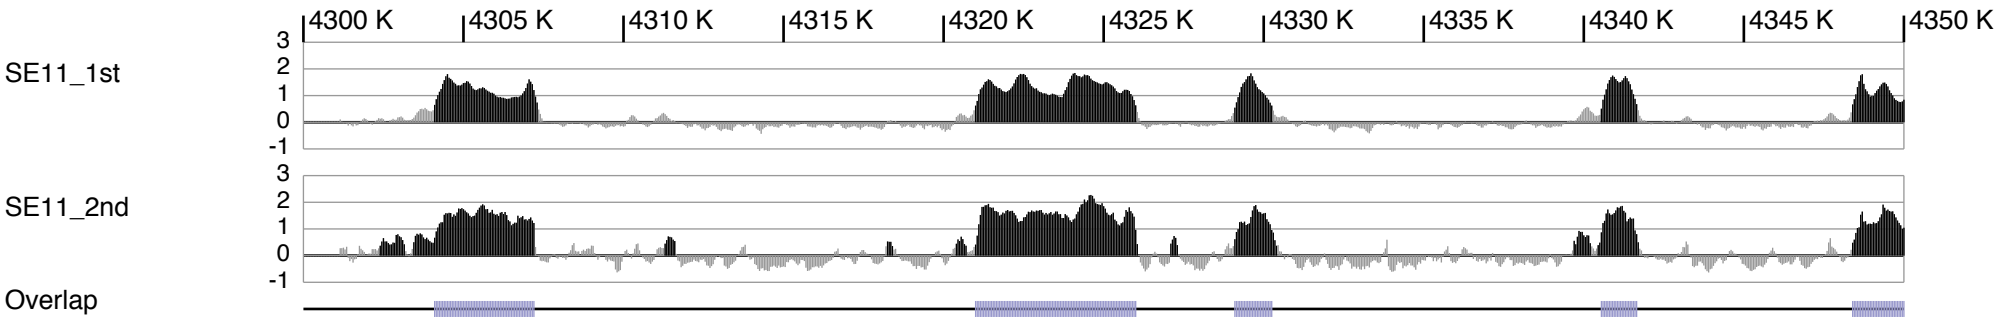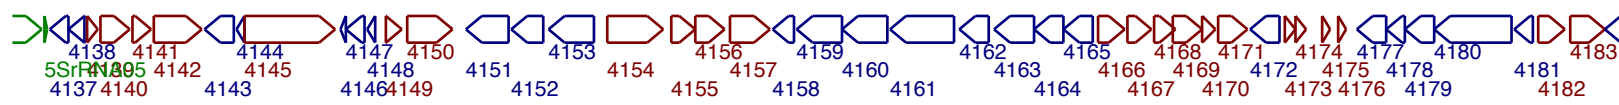

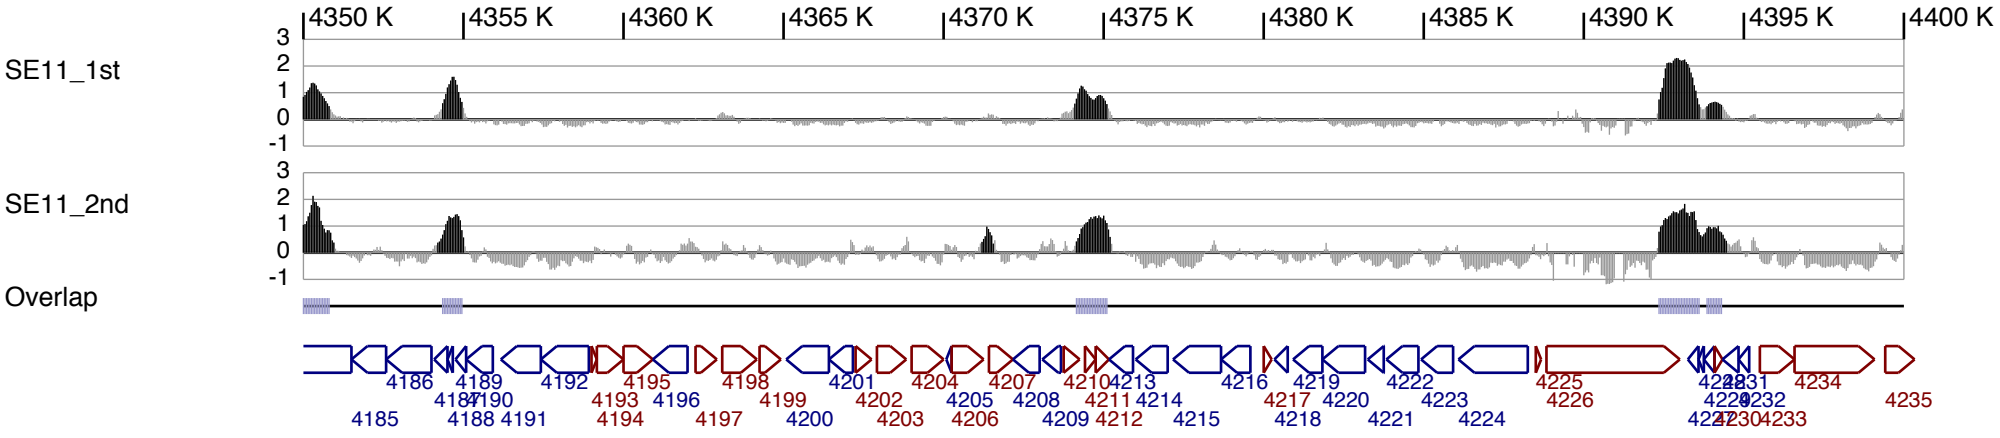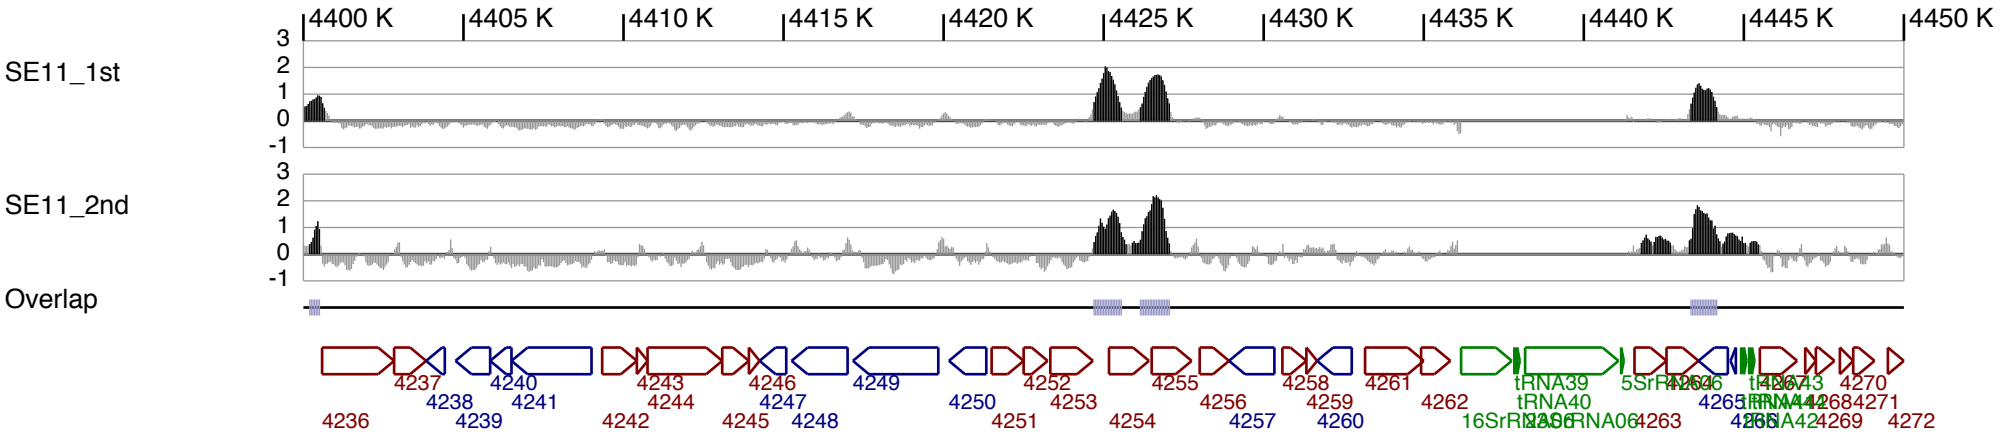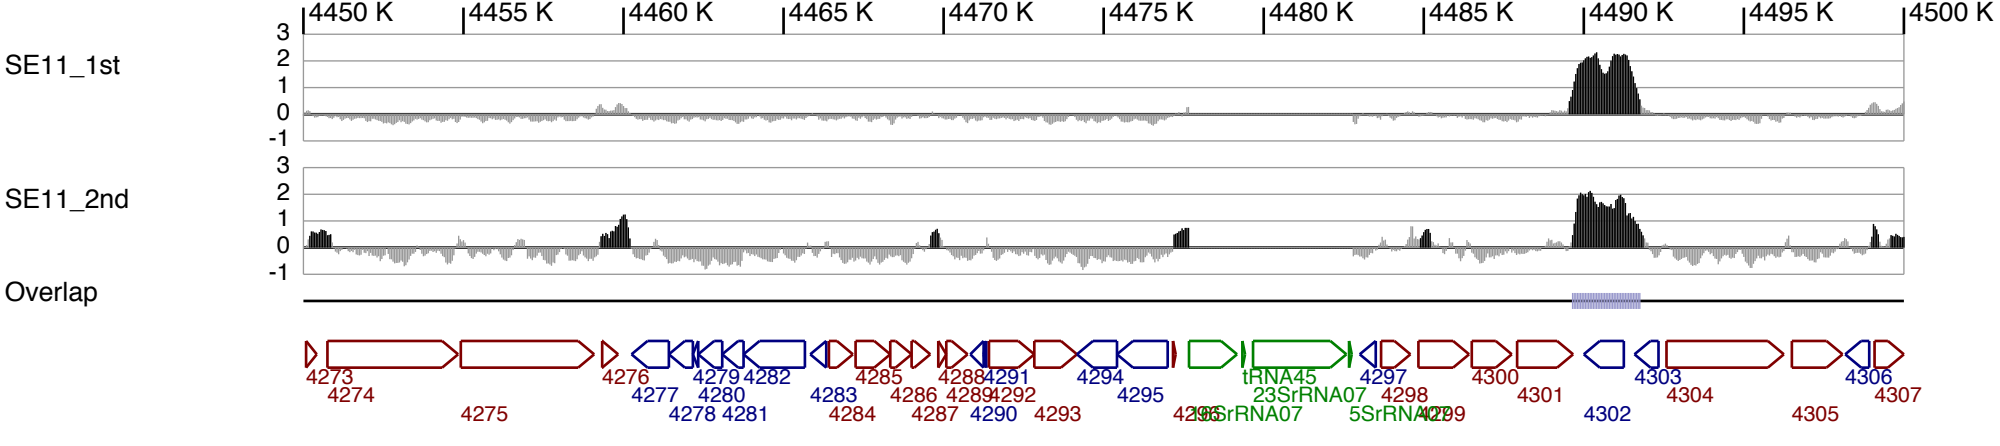

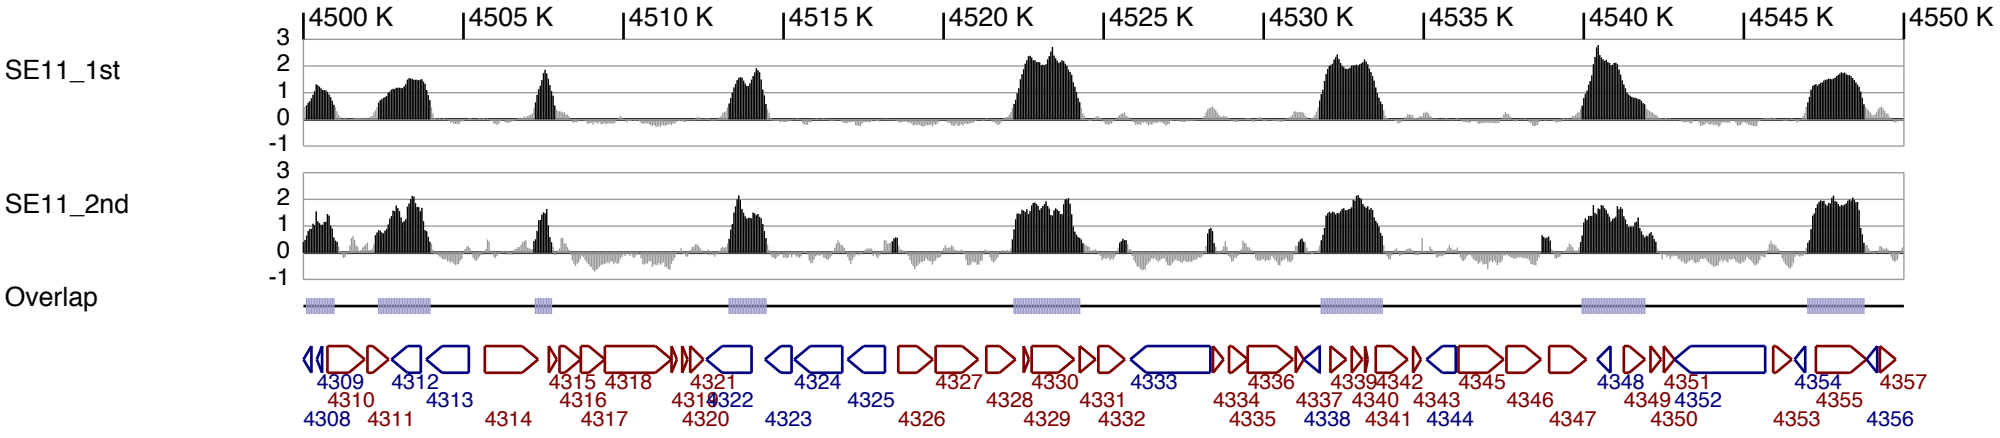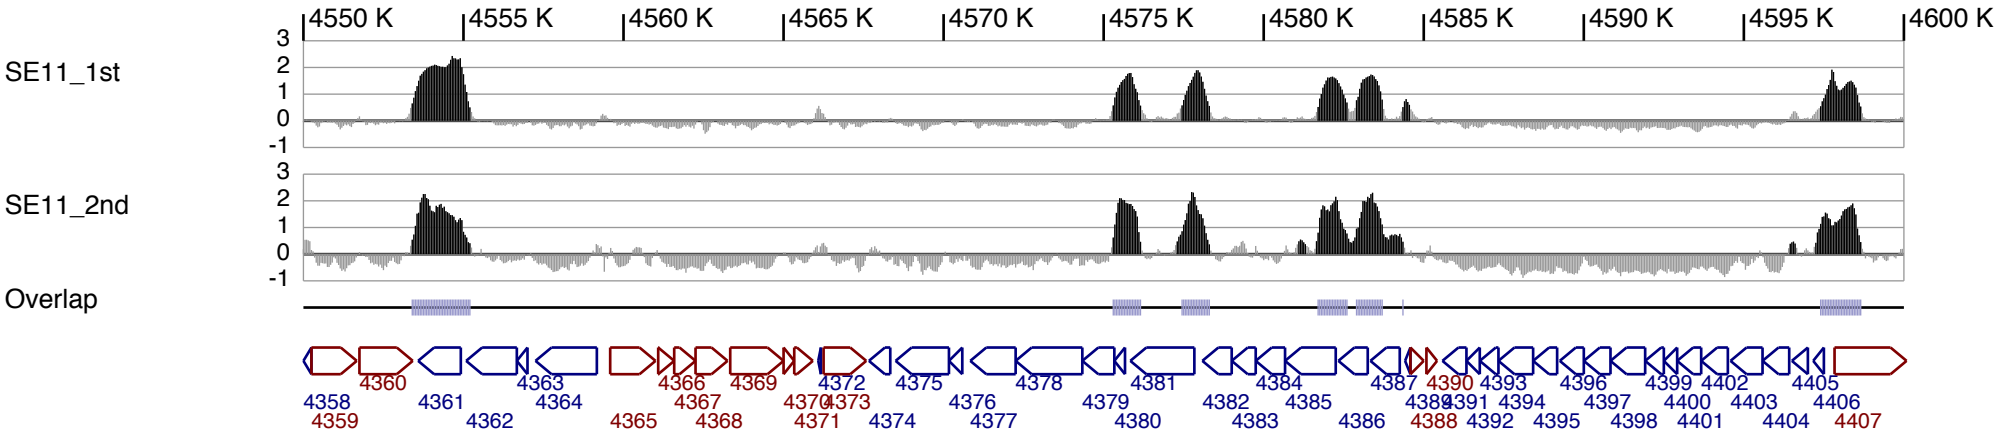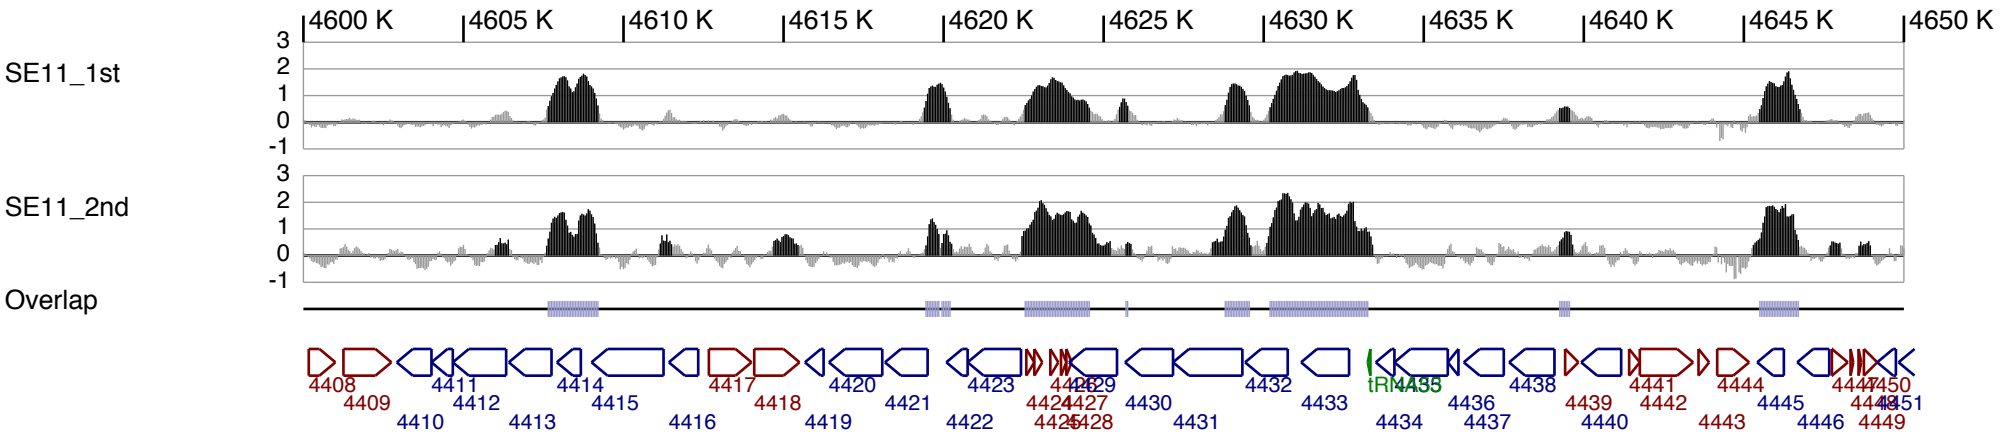



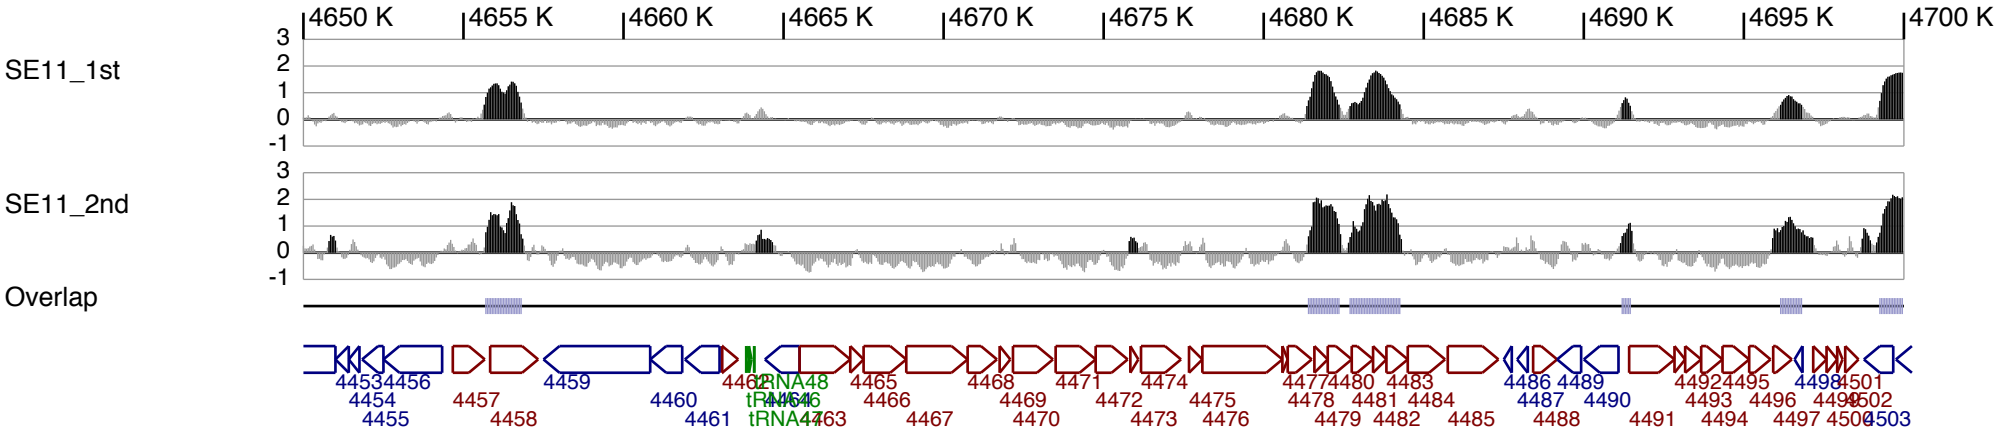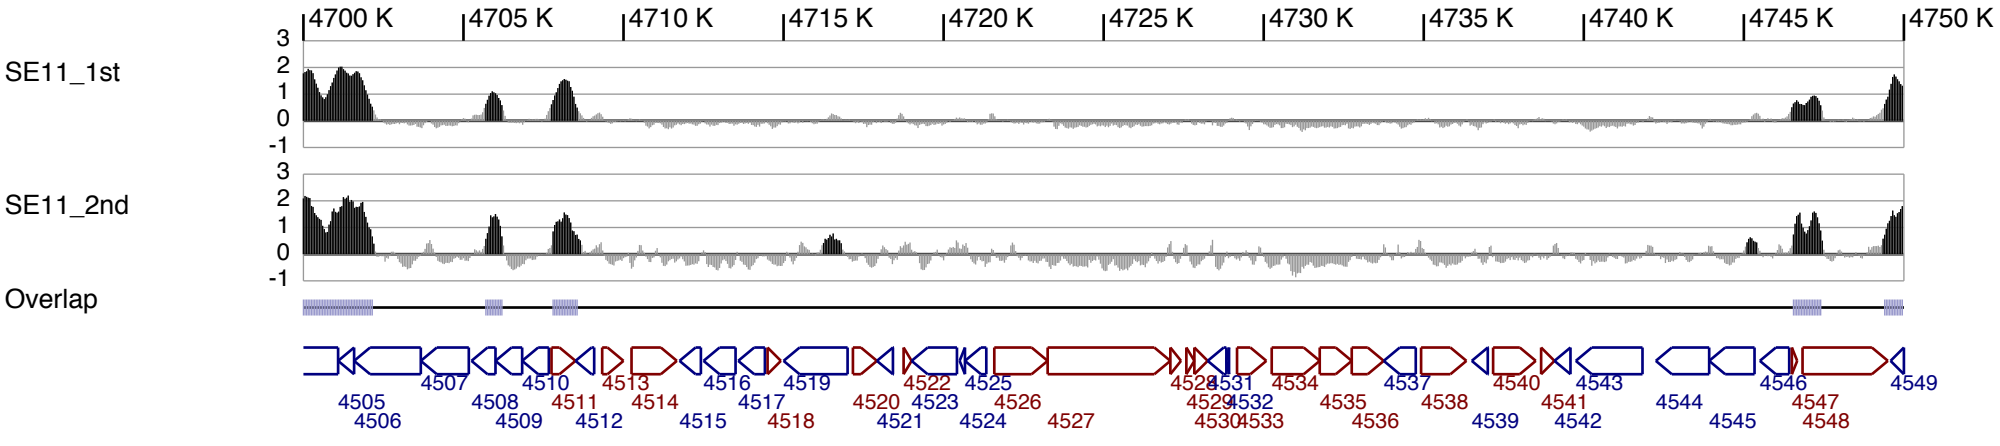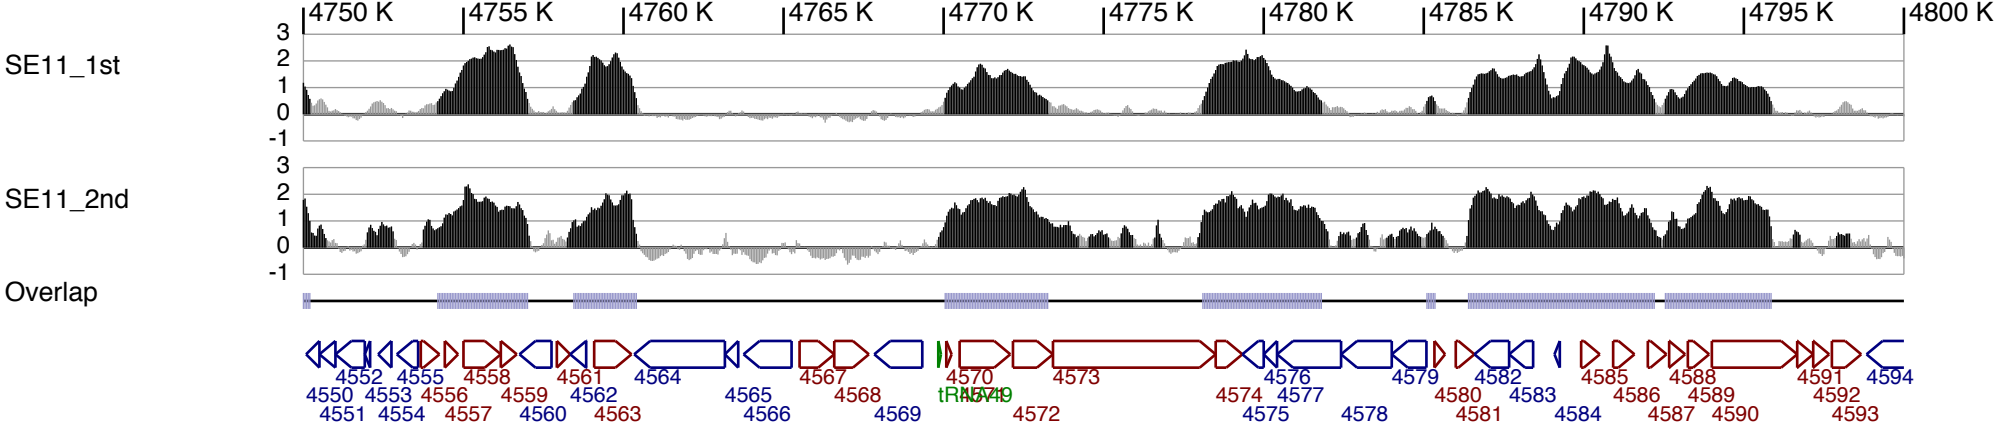

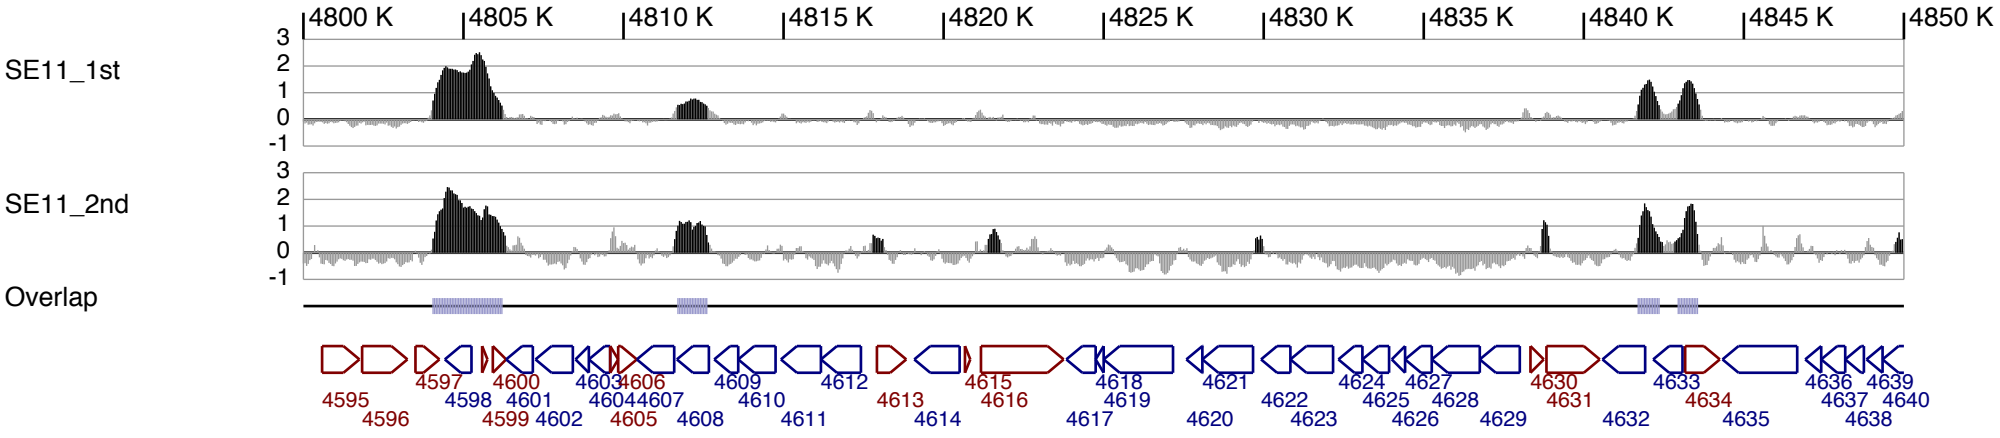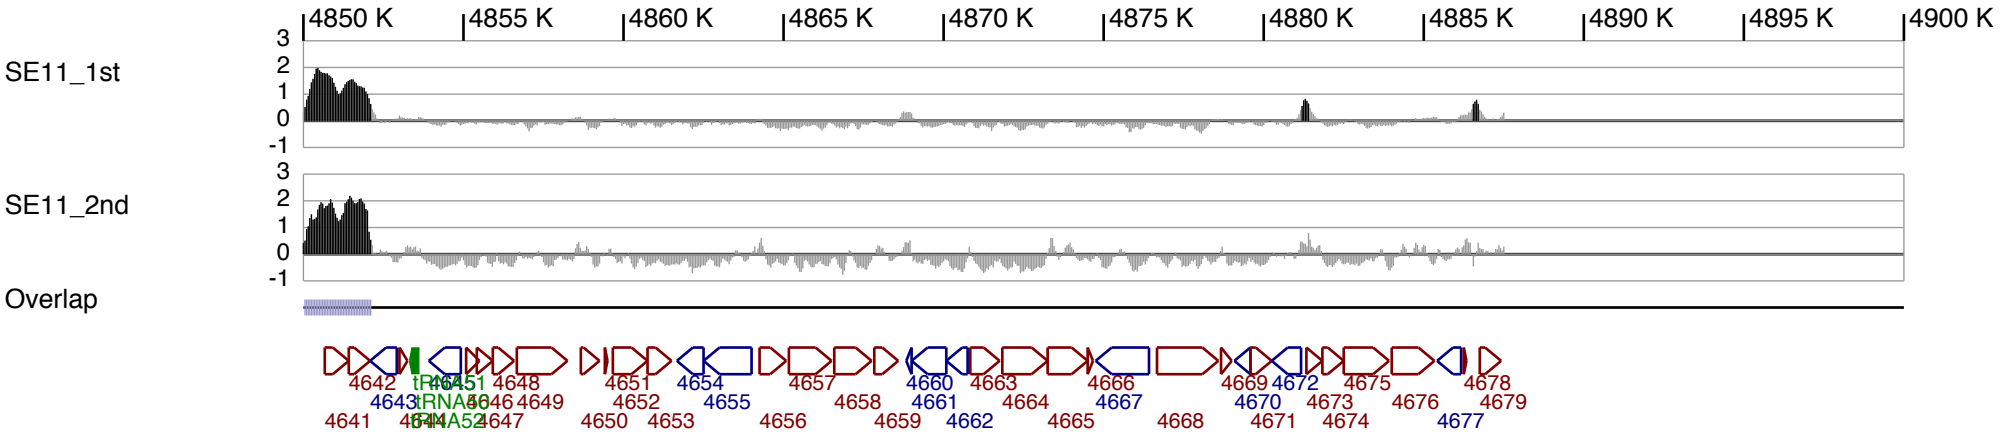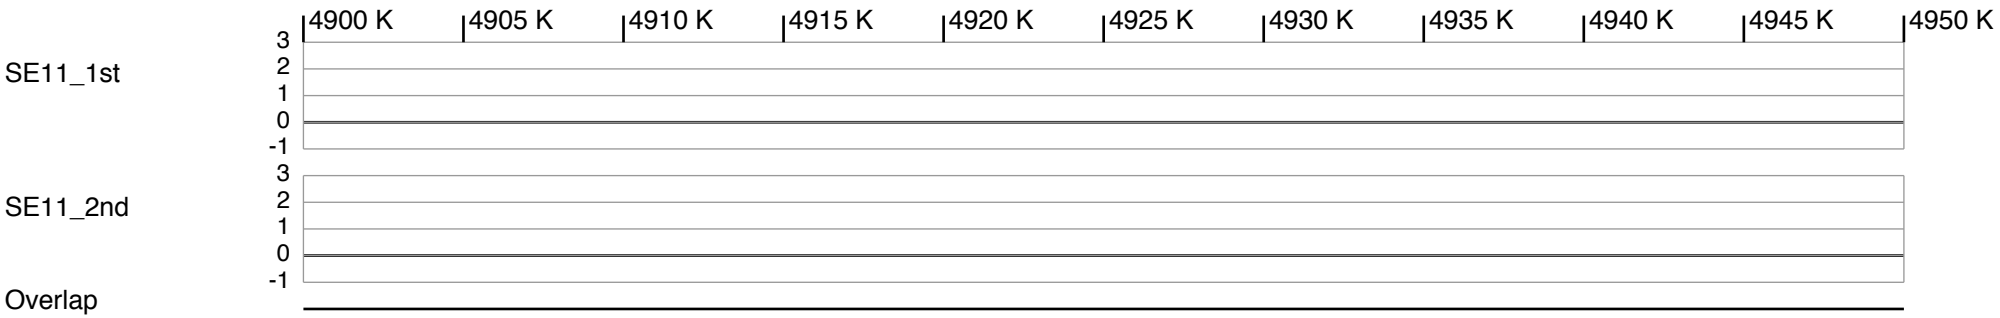

H-NS binding profiles in *Escherichia coli* SE15  
(1st experiment and 2nd experiment)

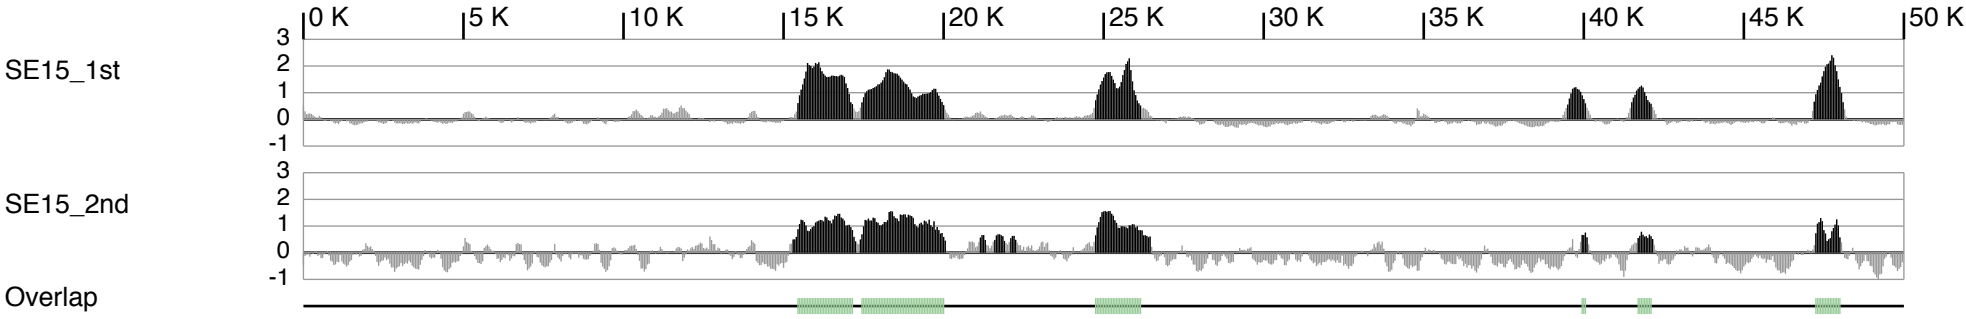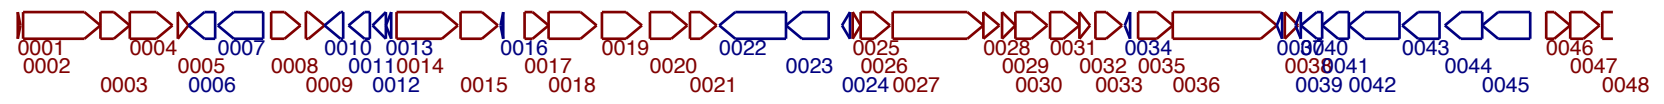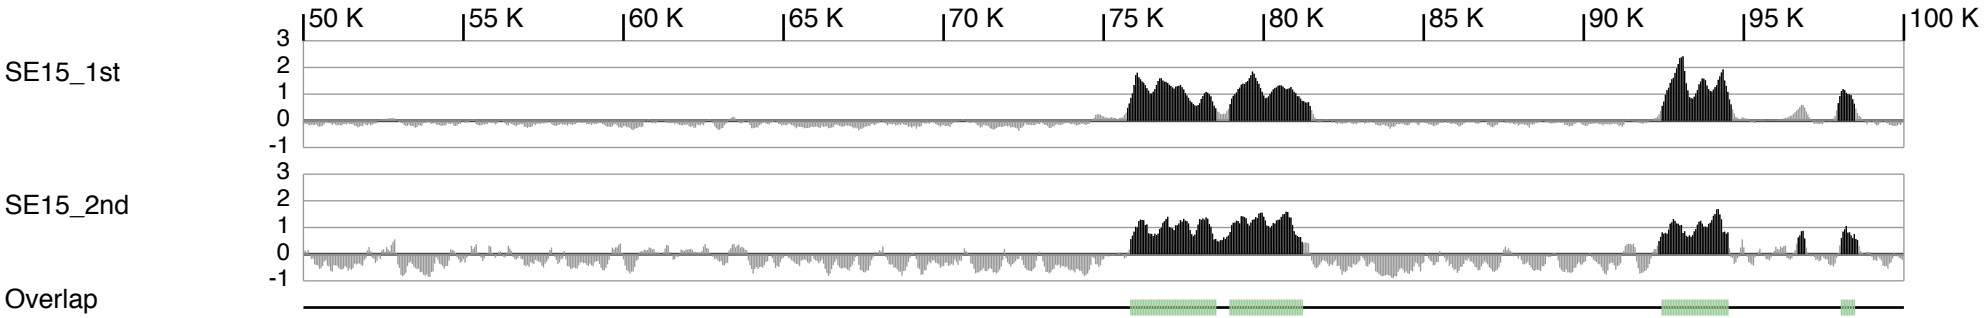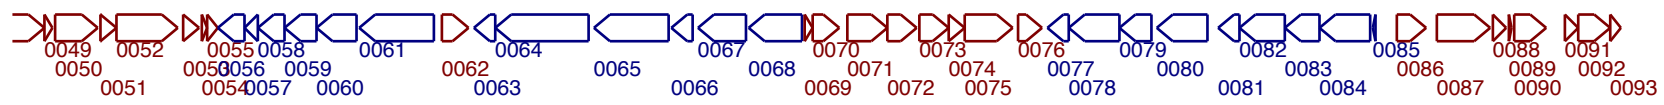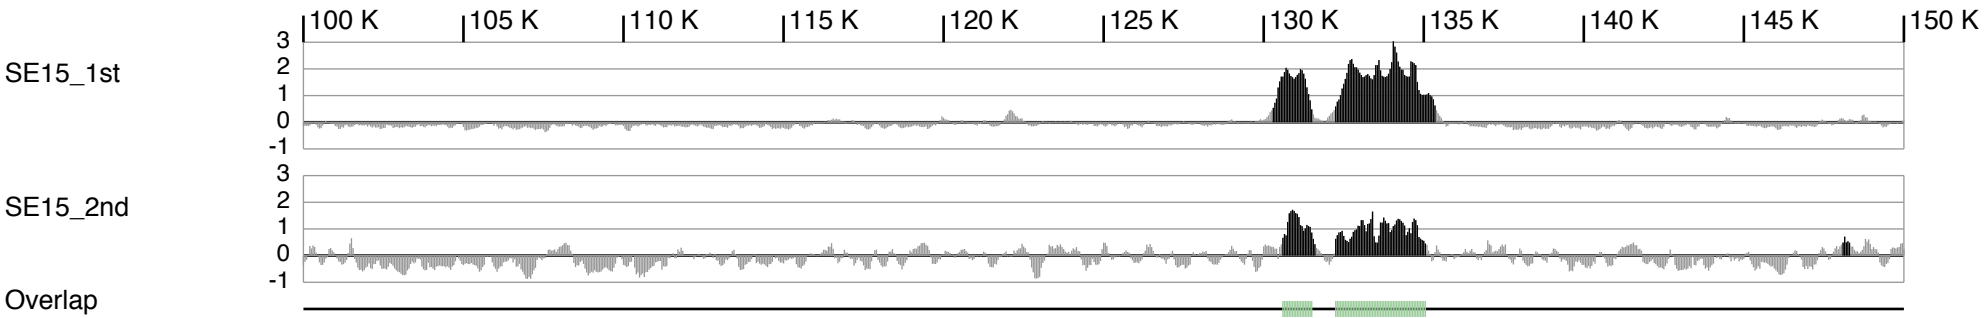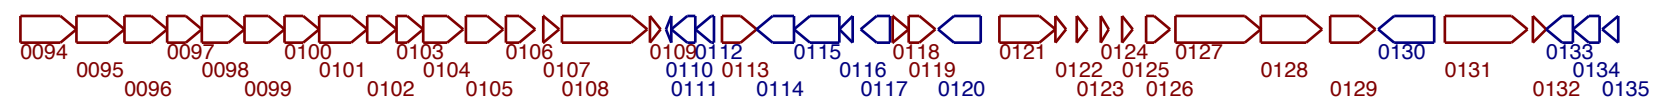

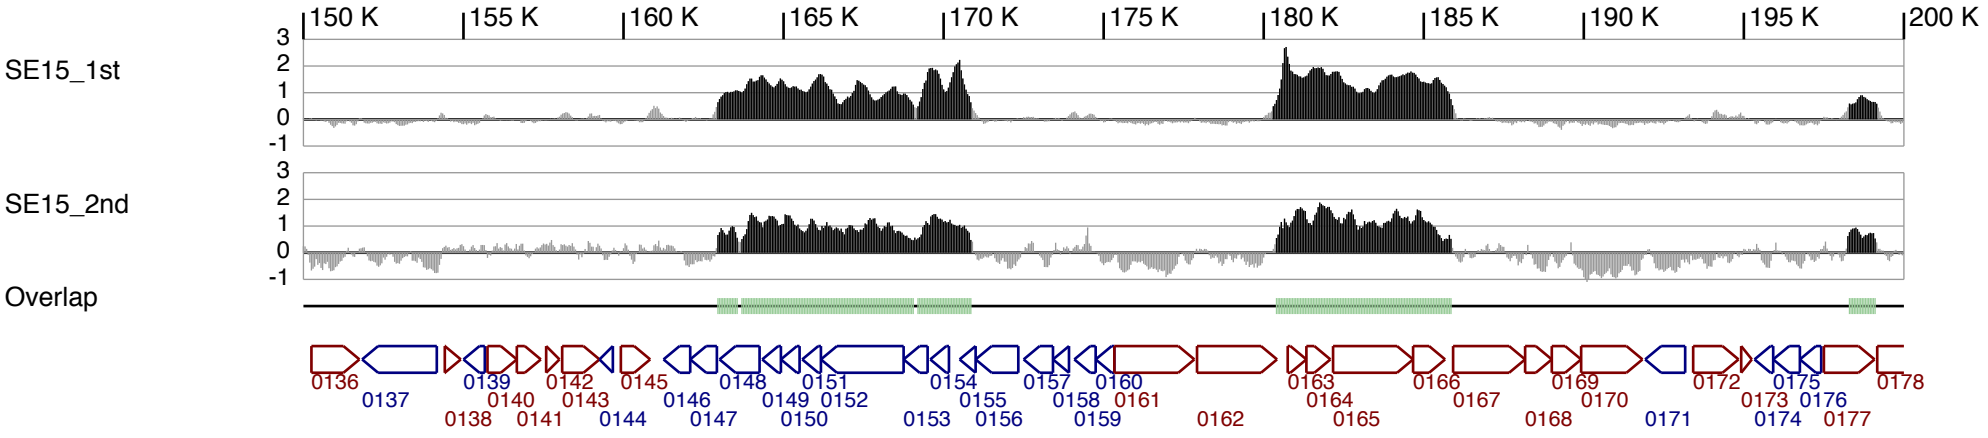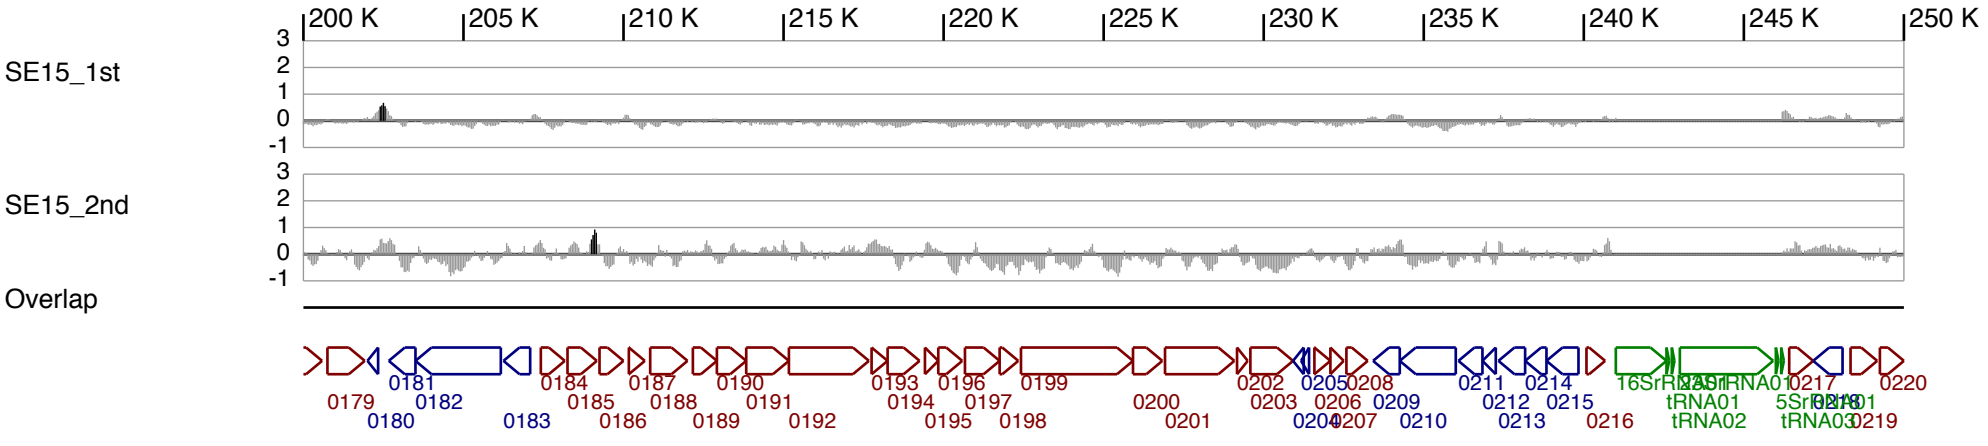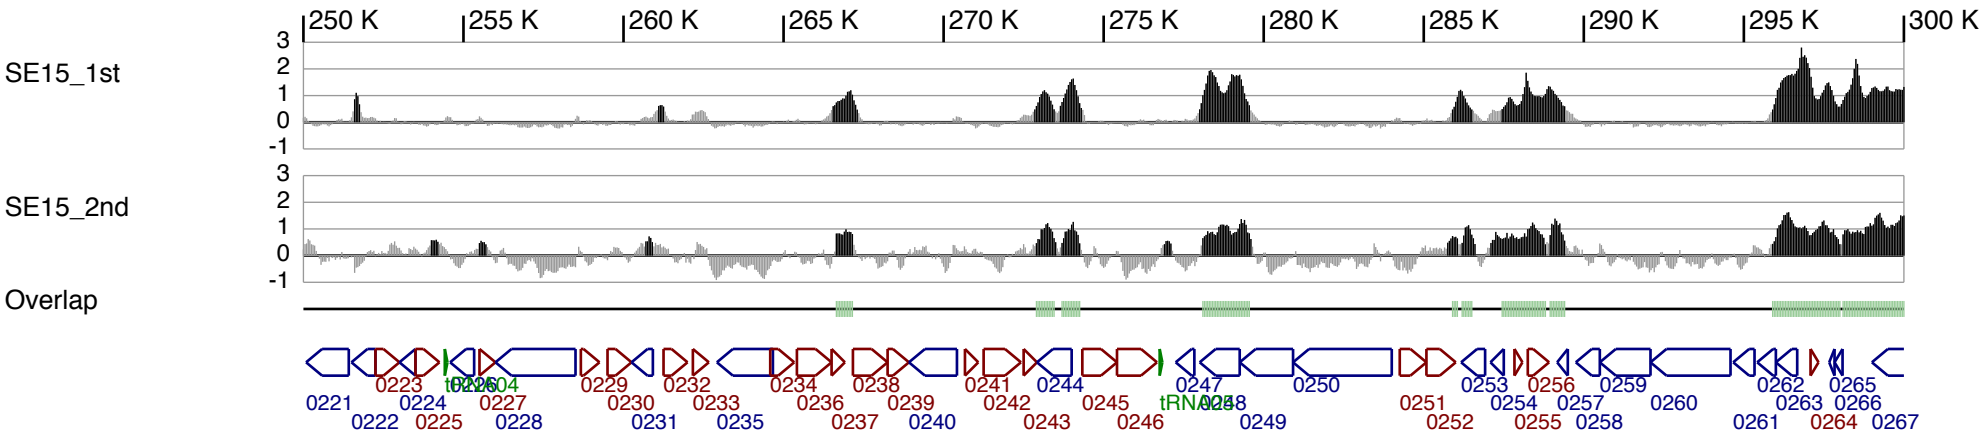

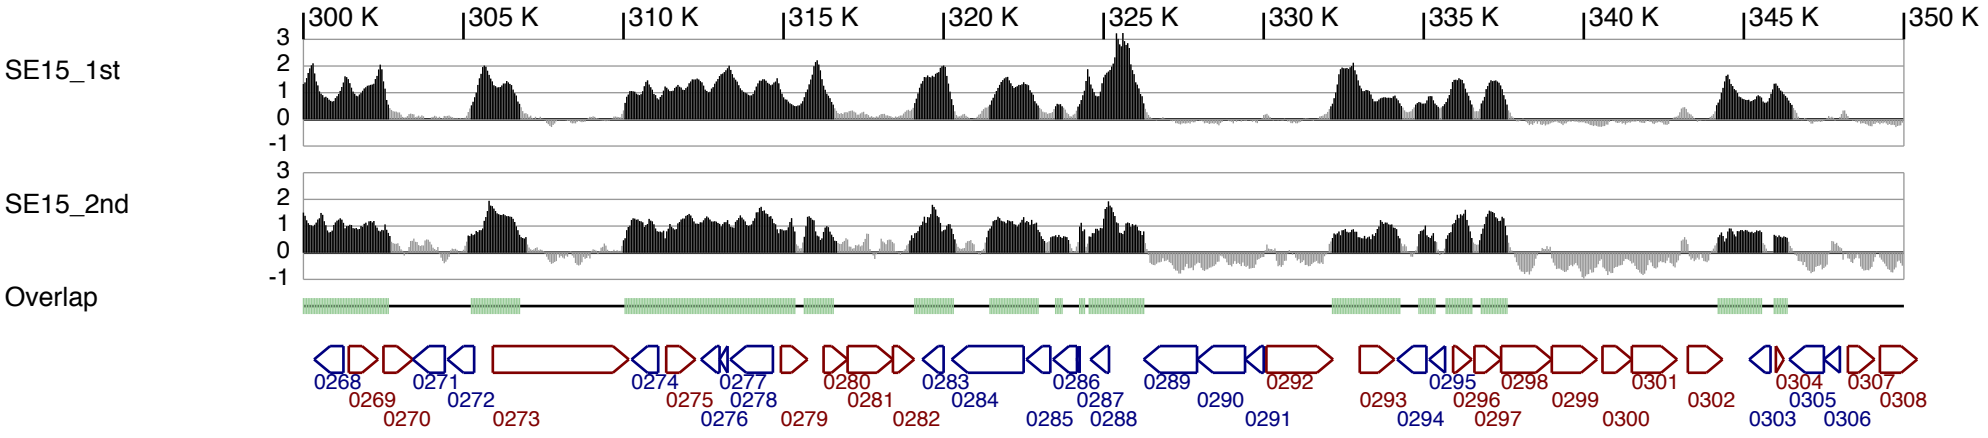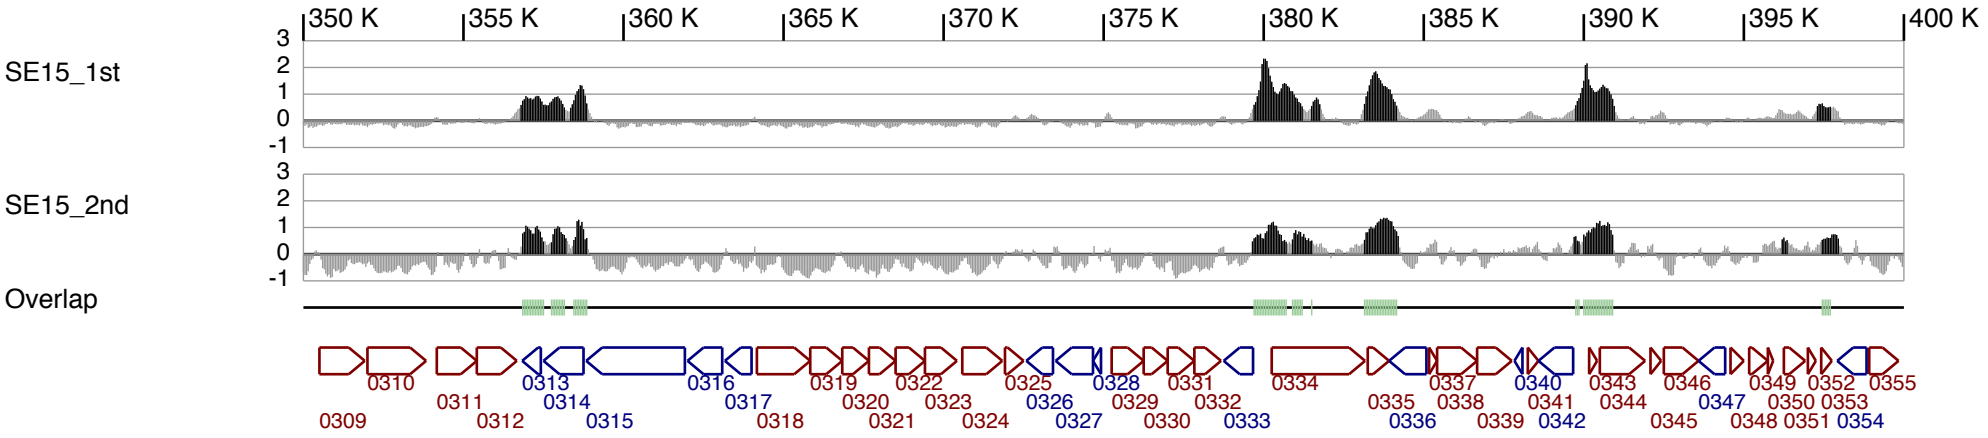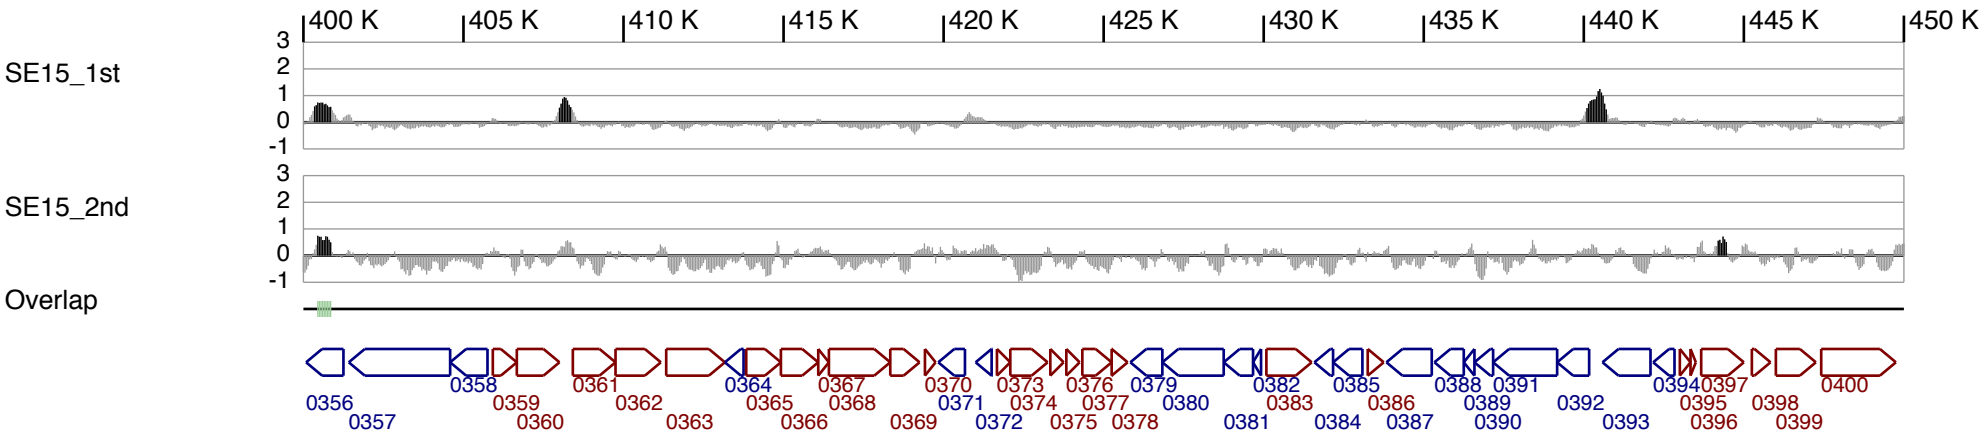

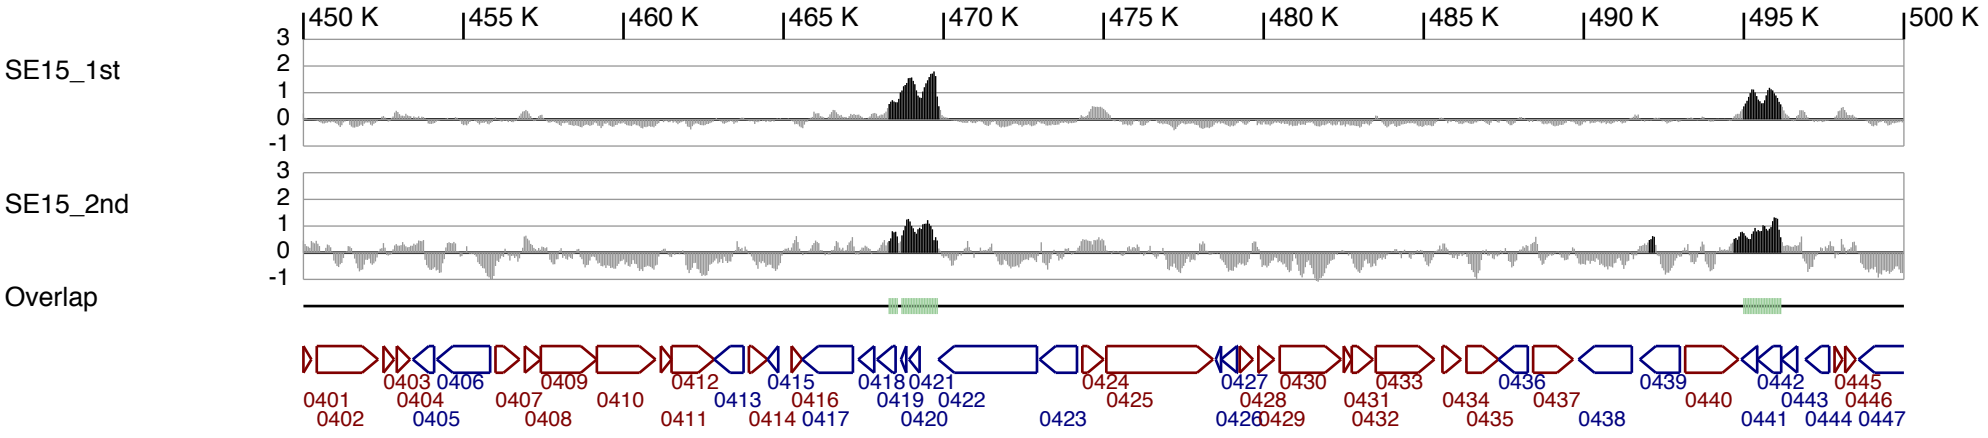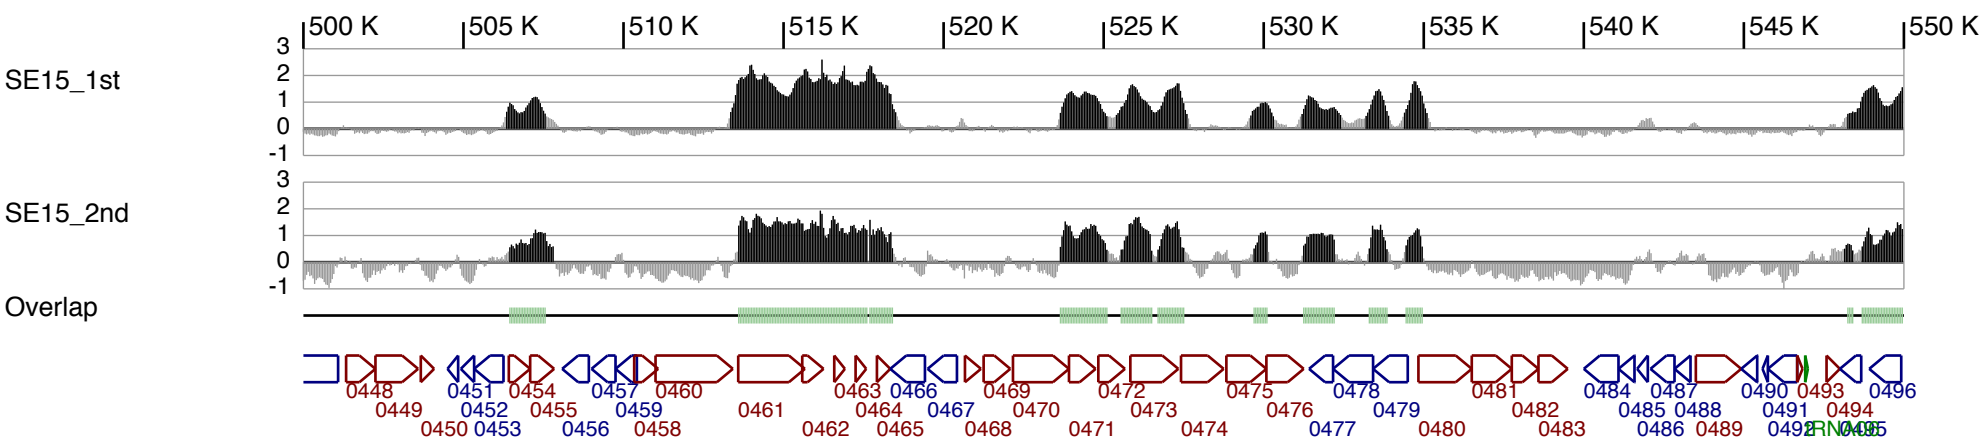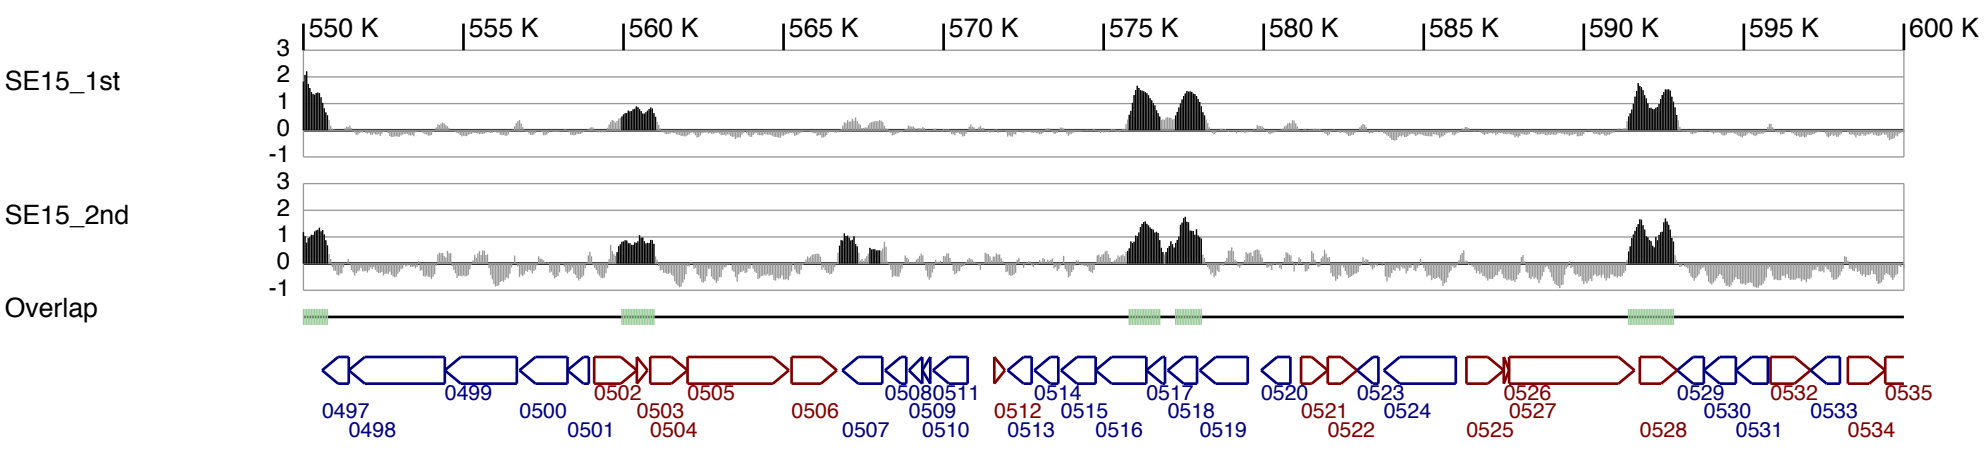

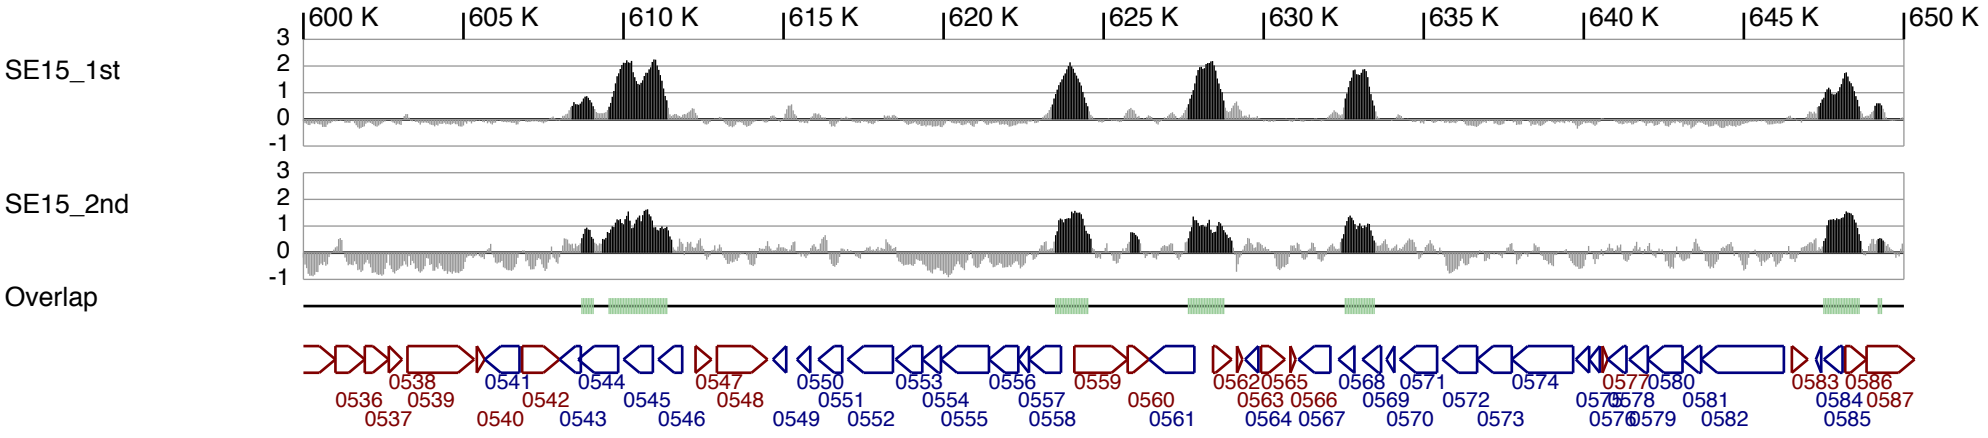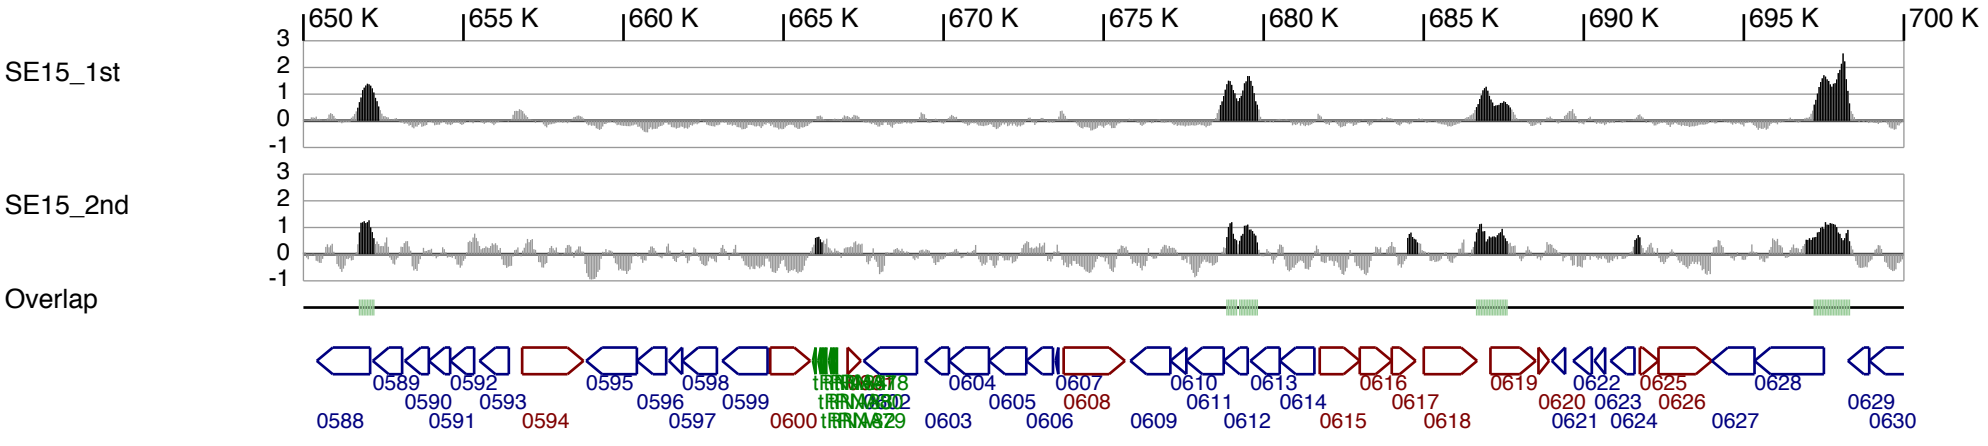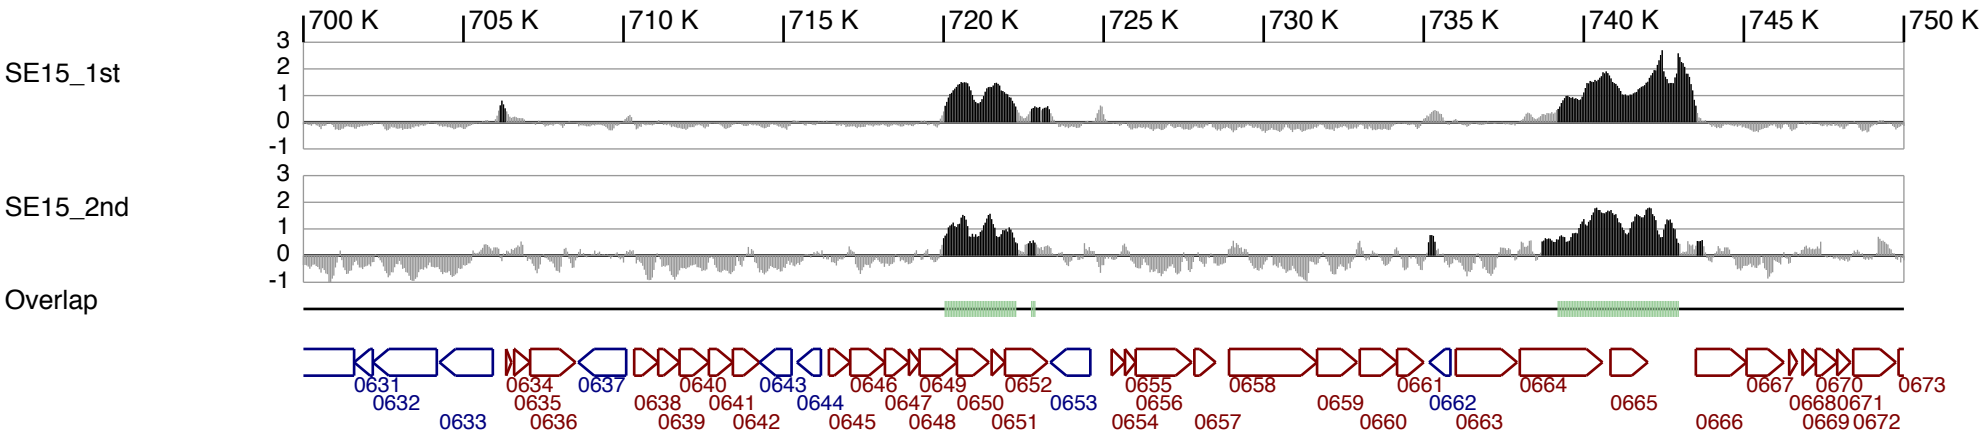



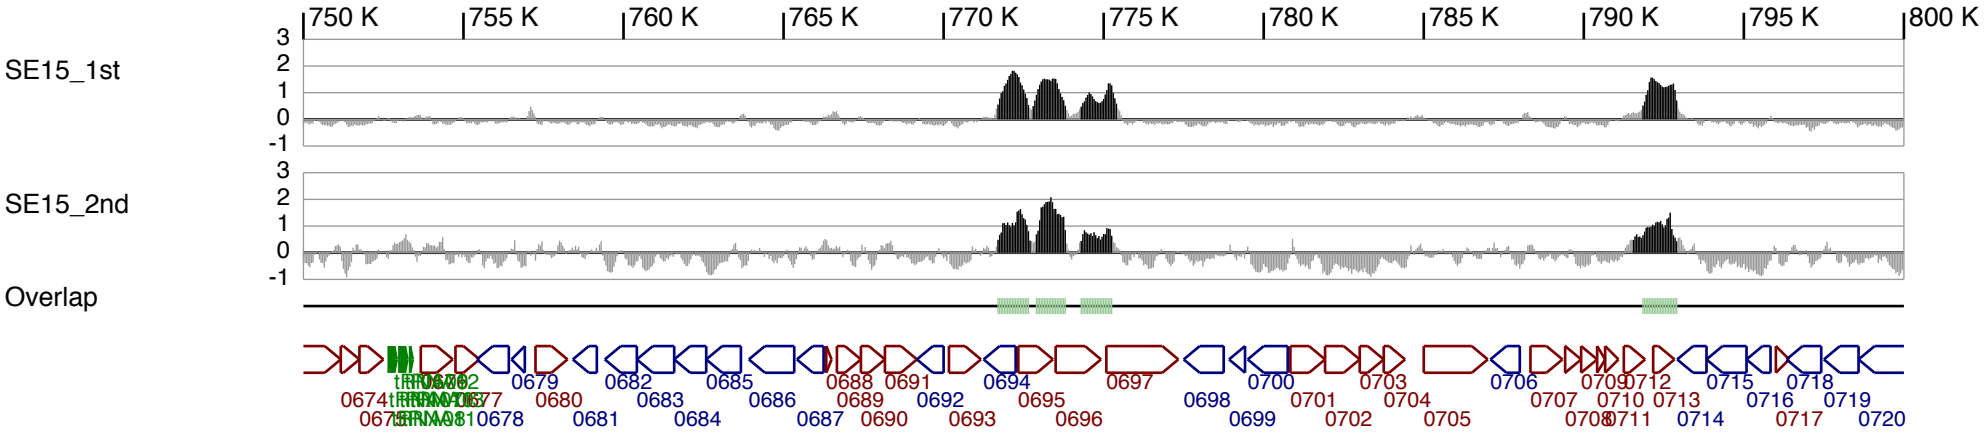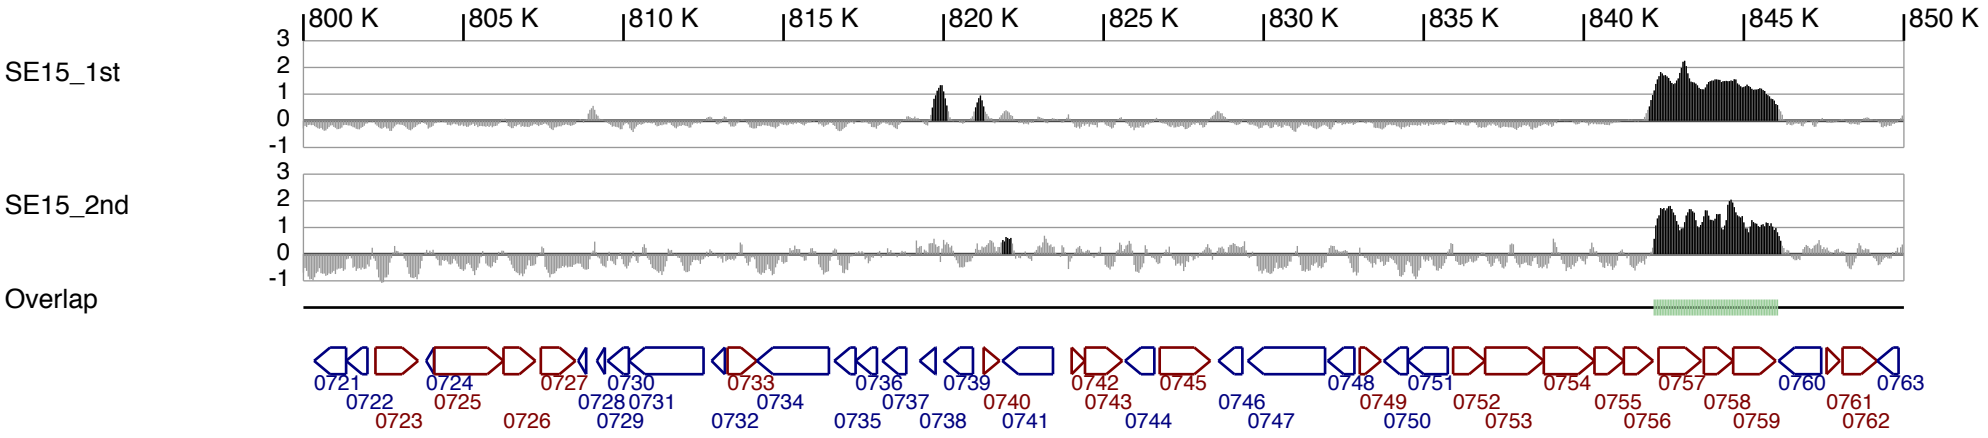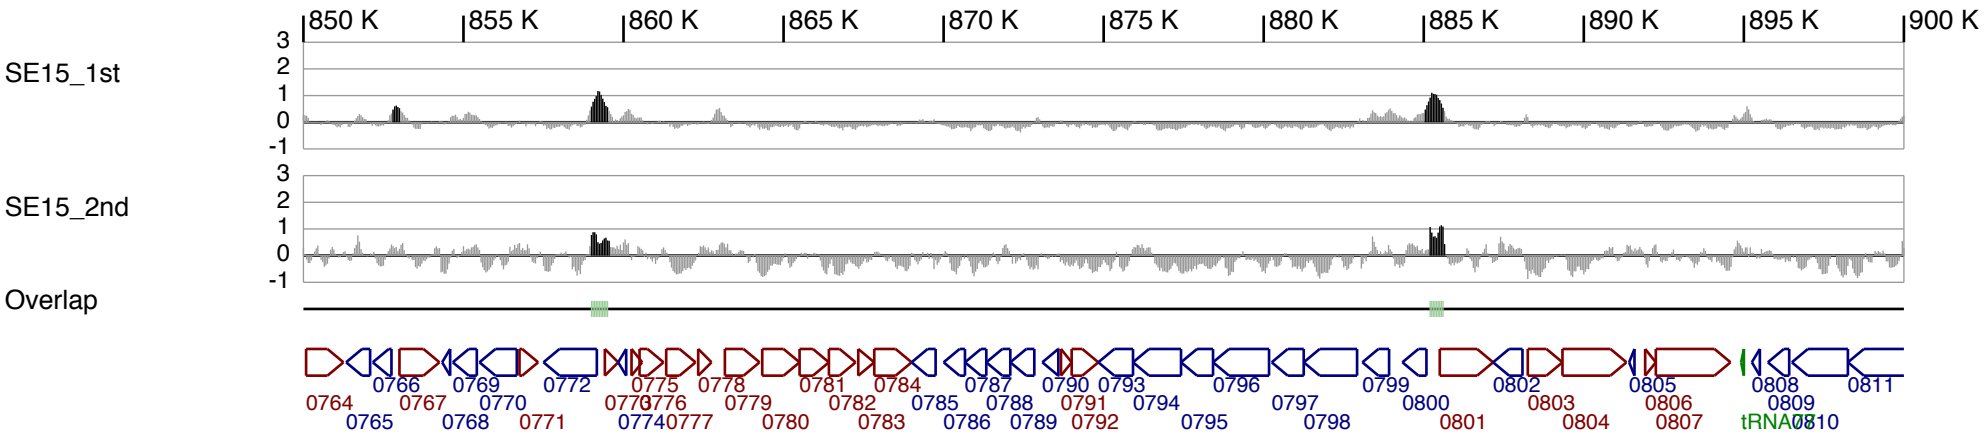

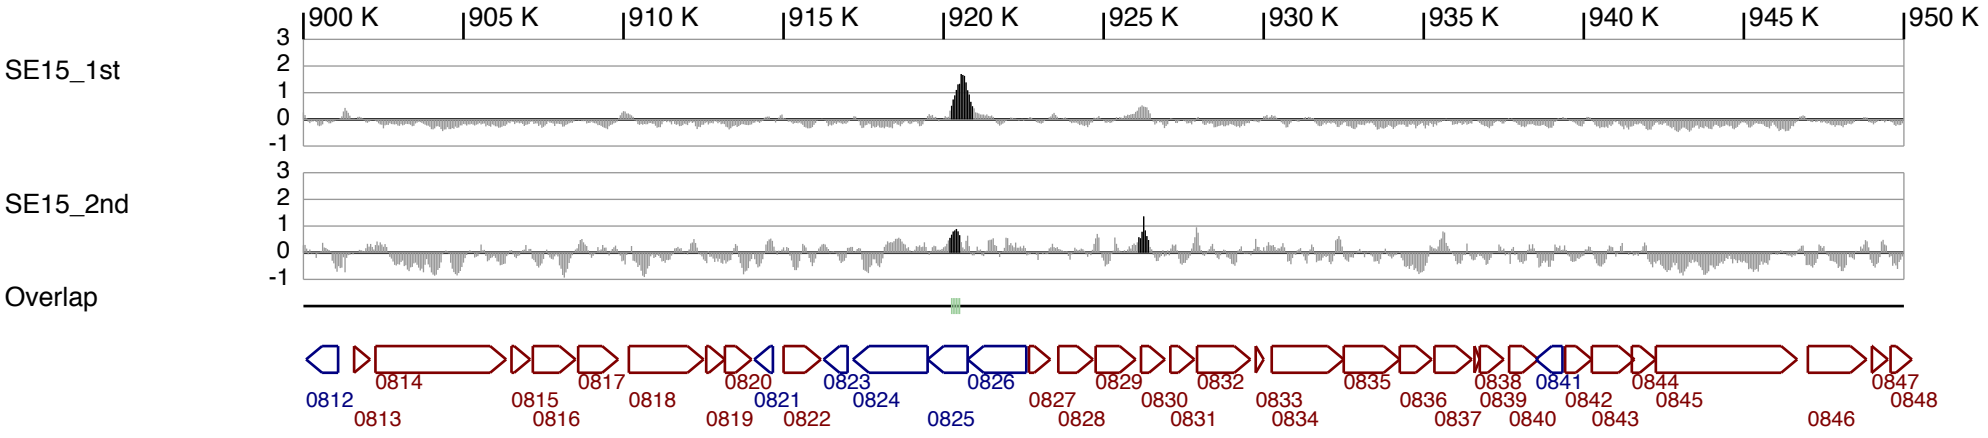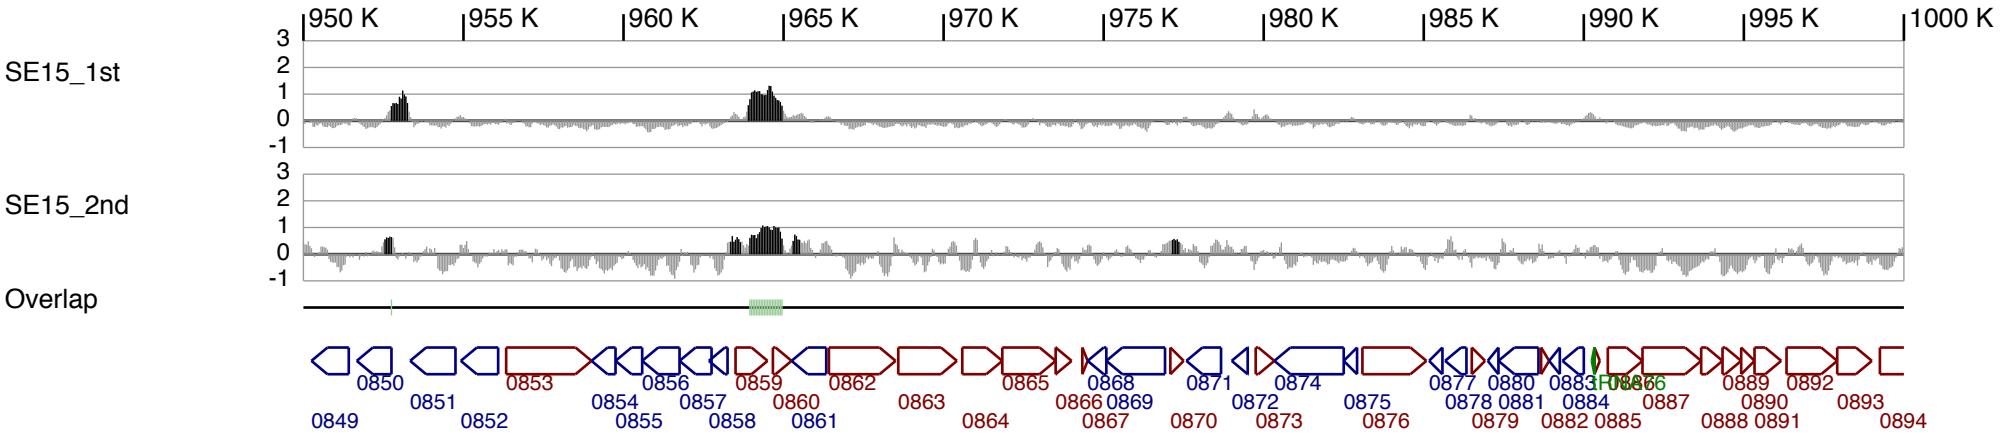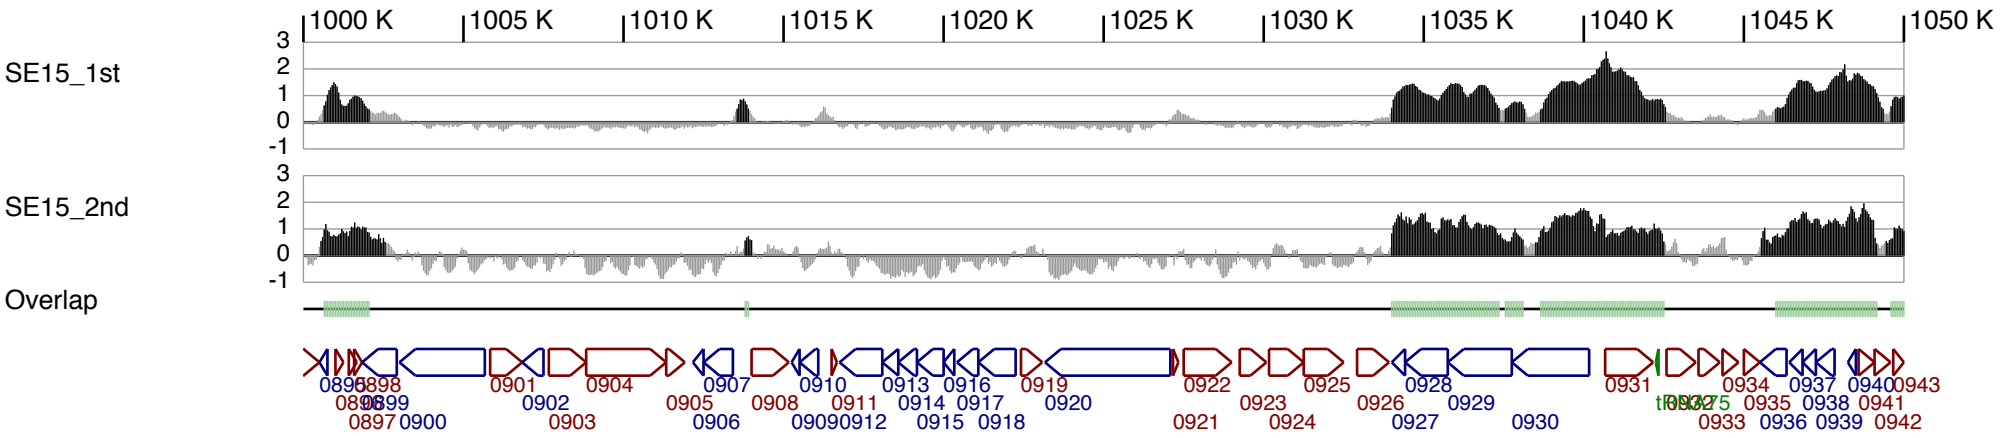

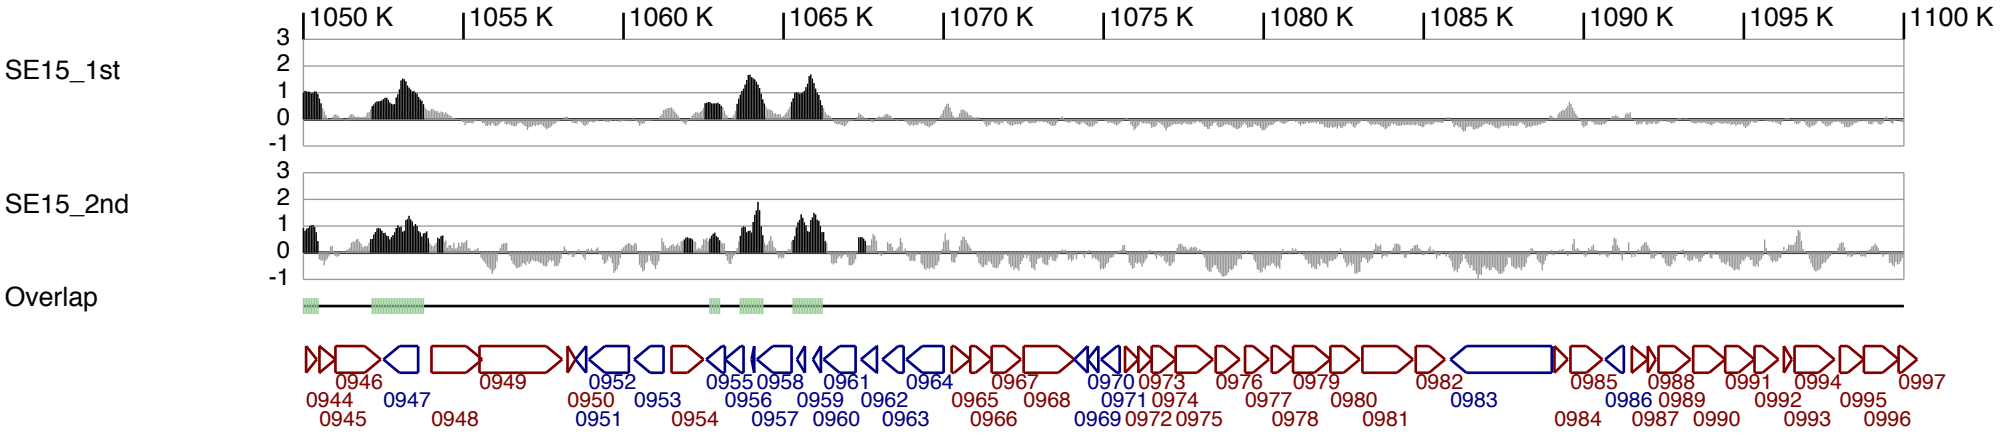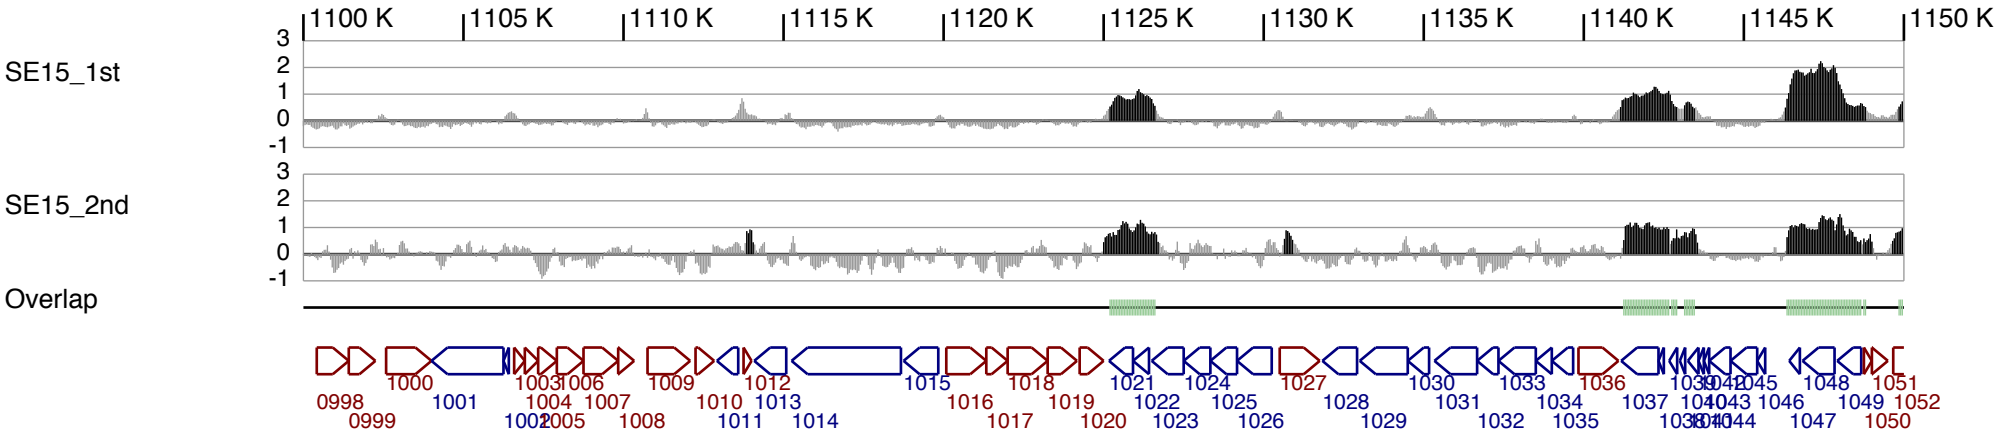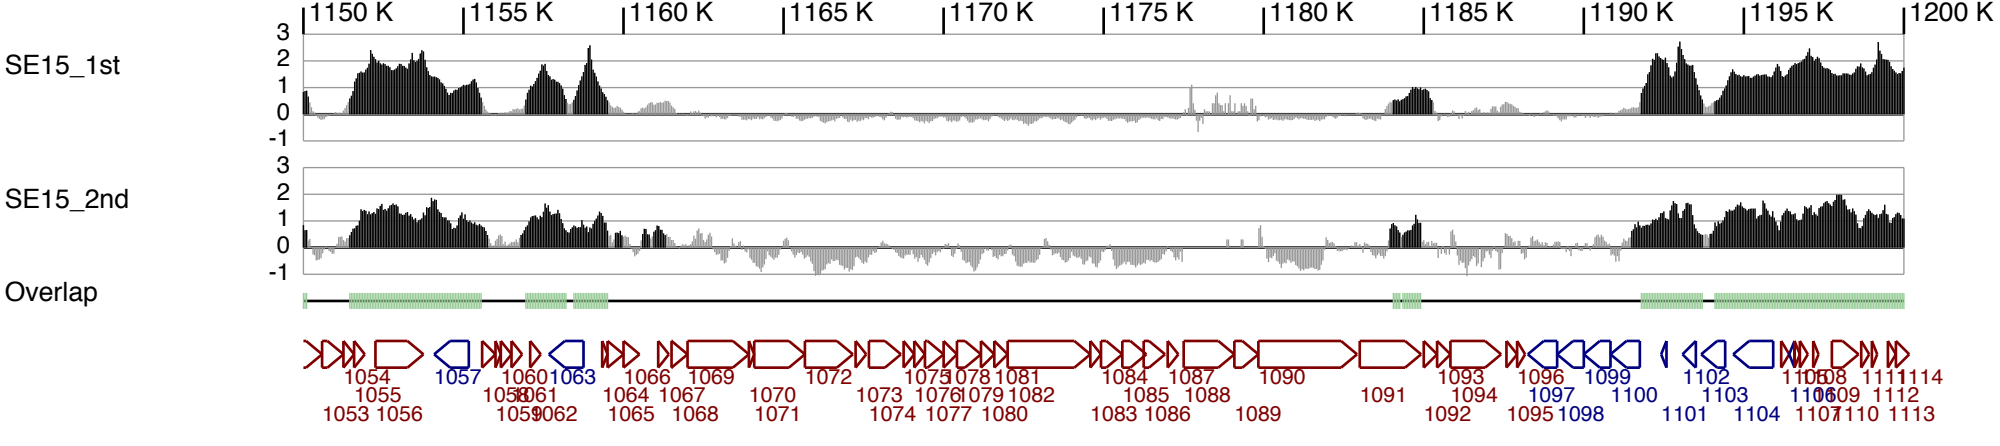

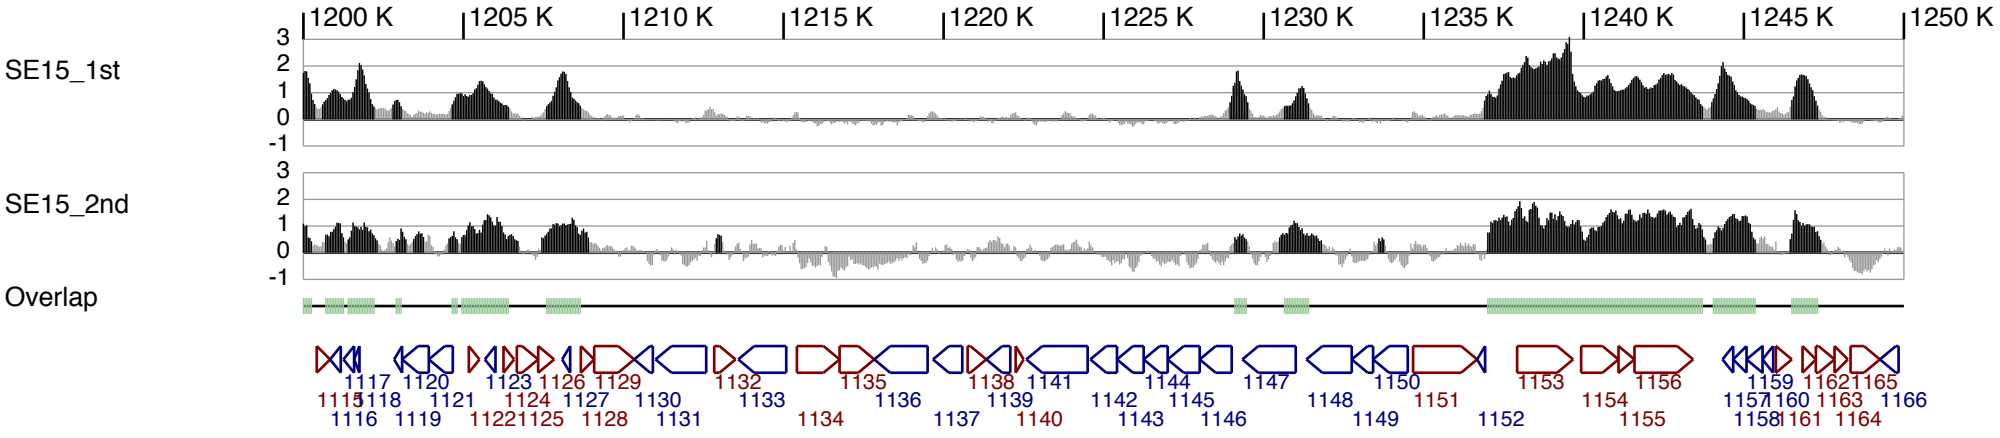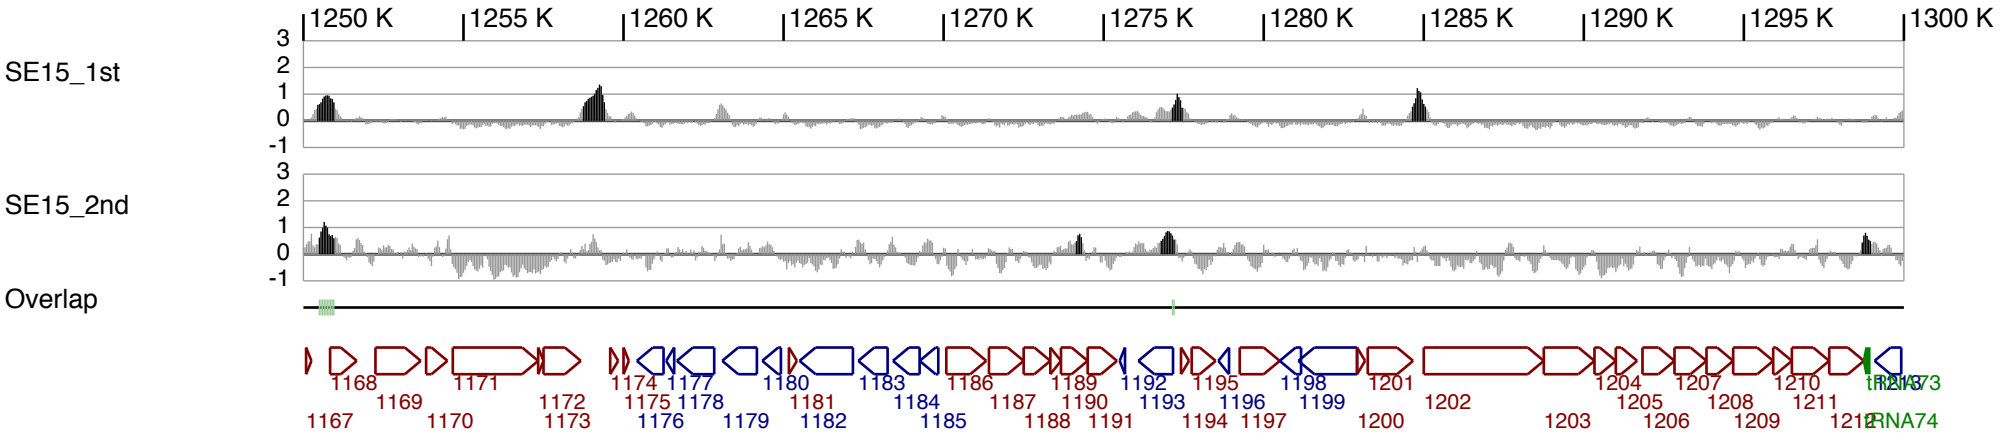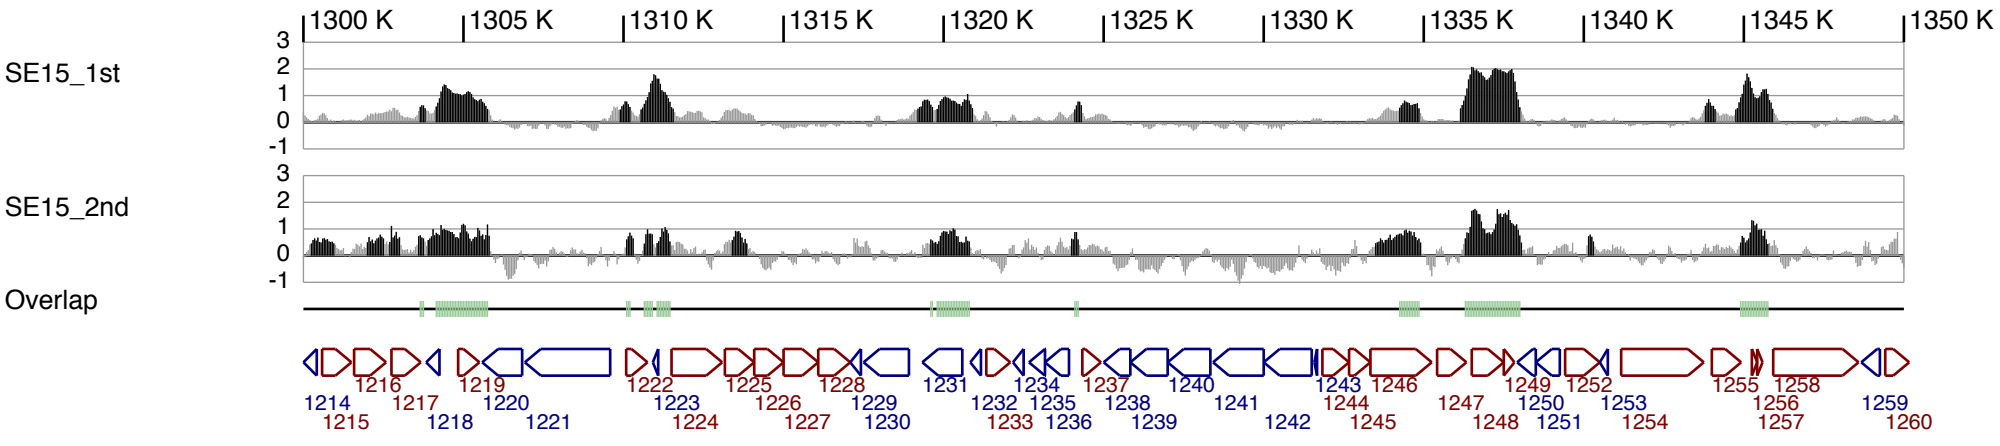

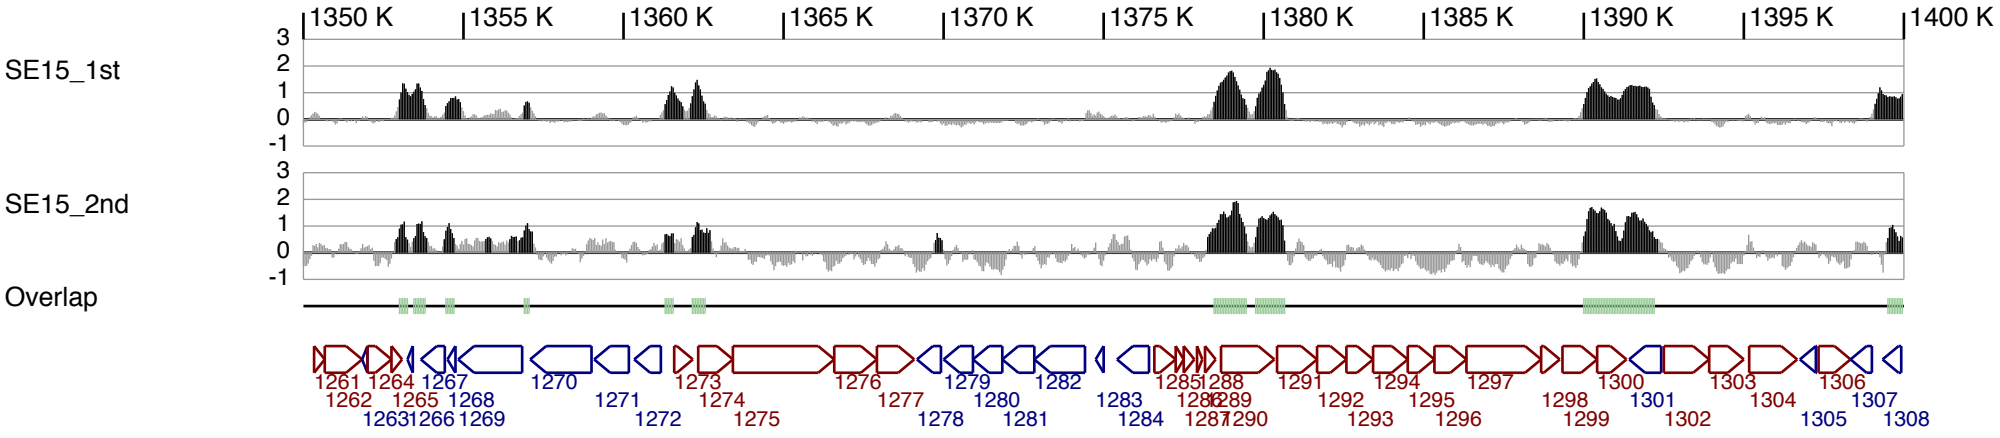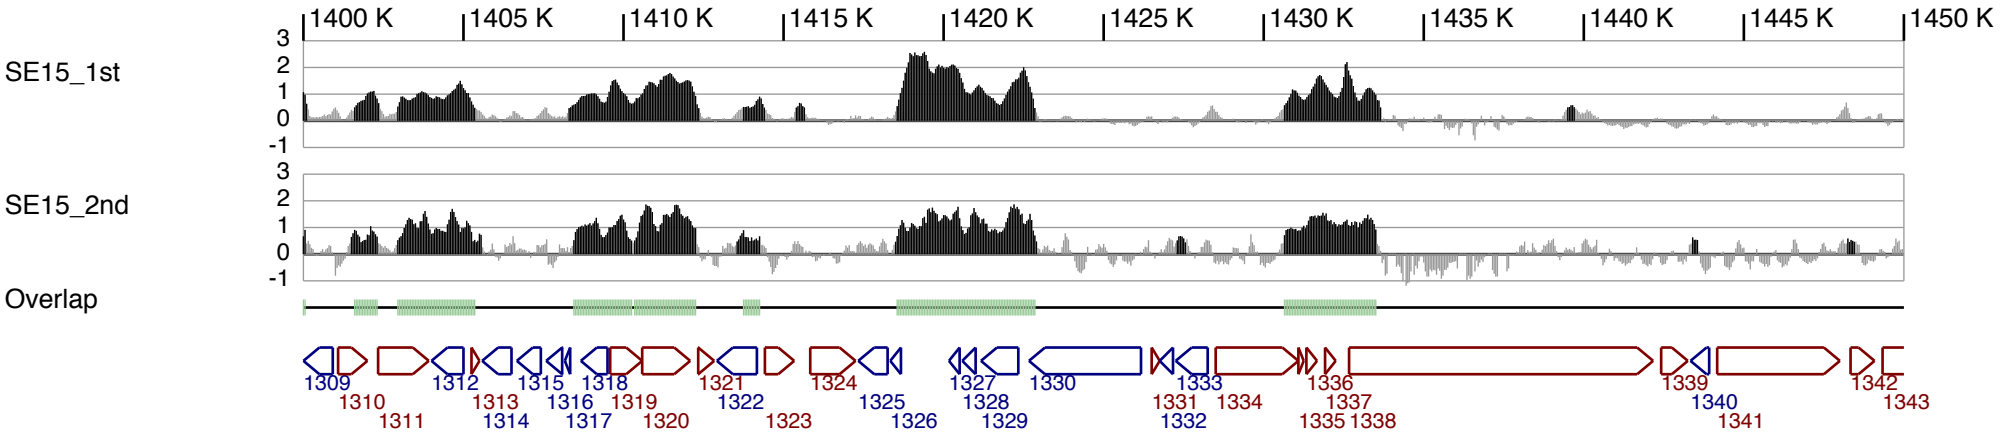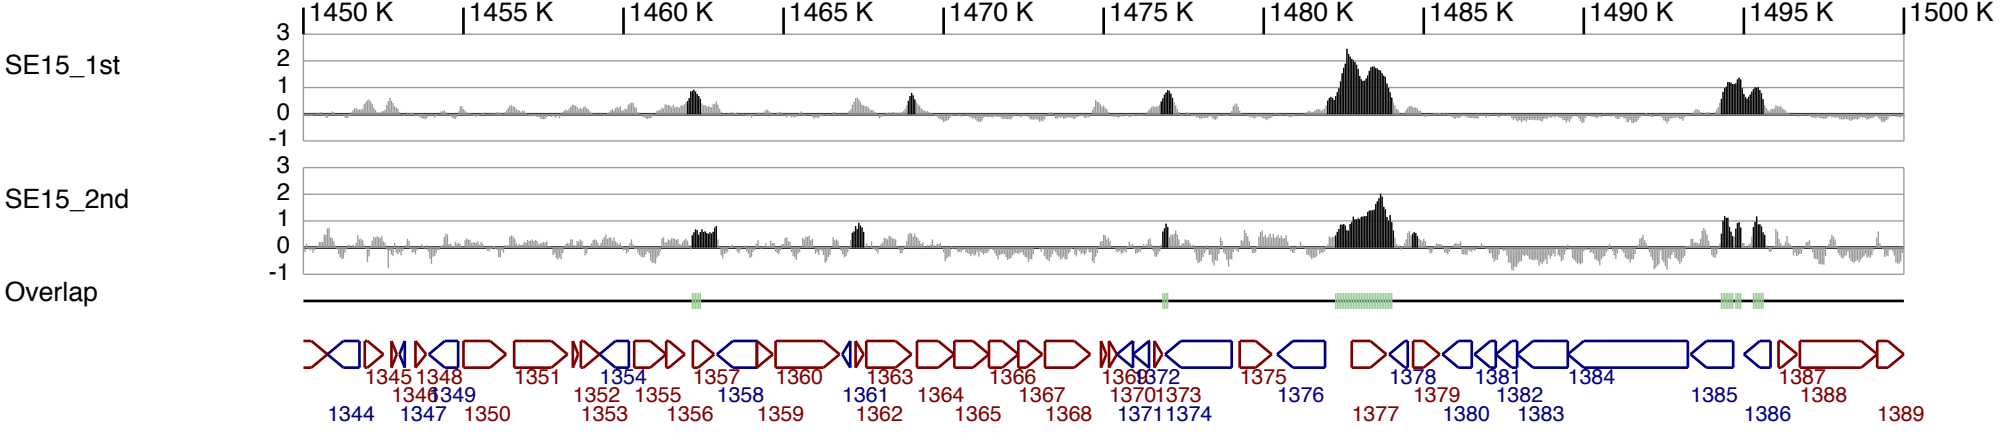

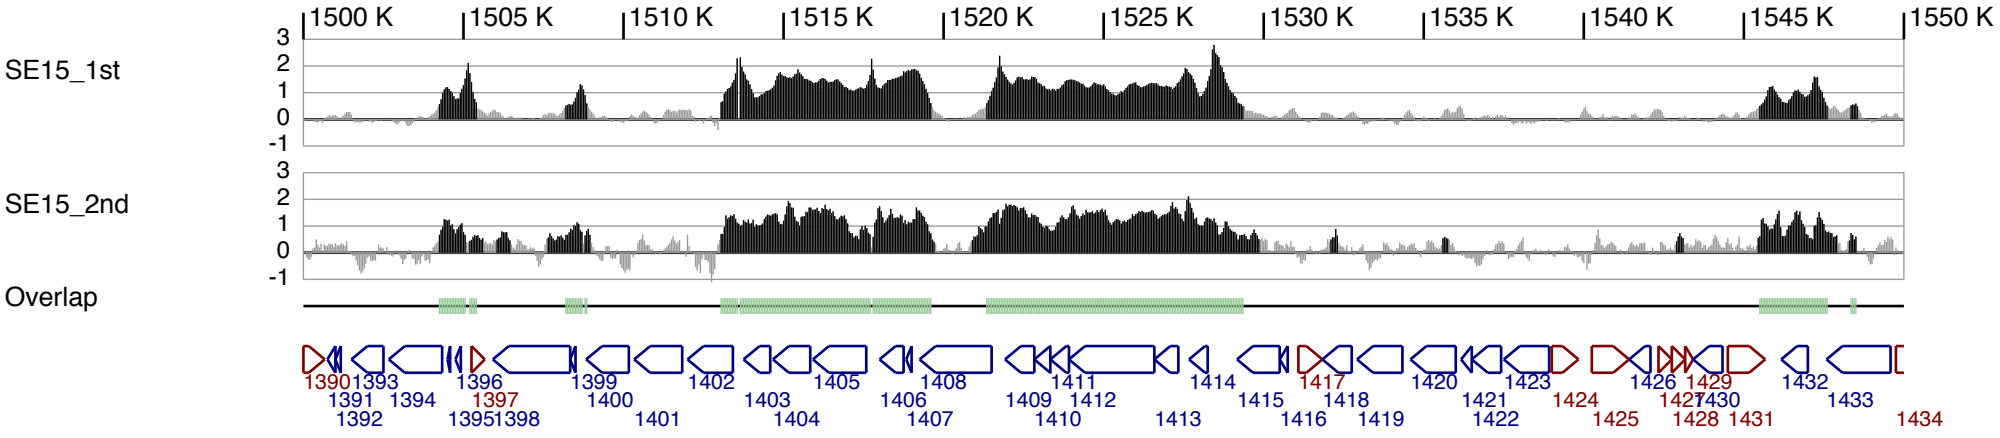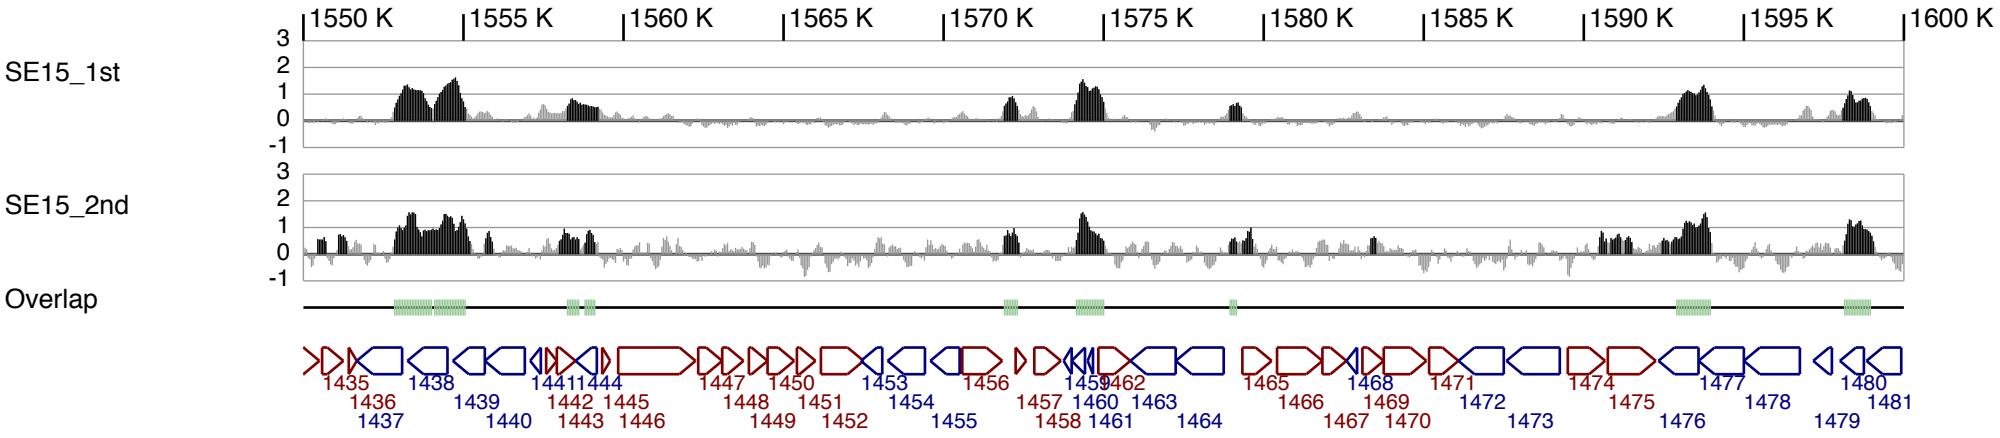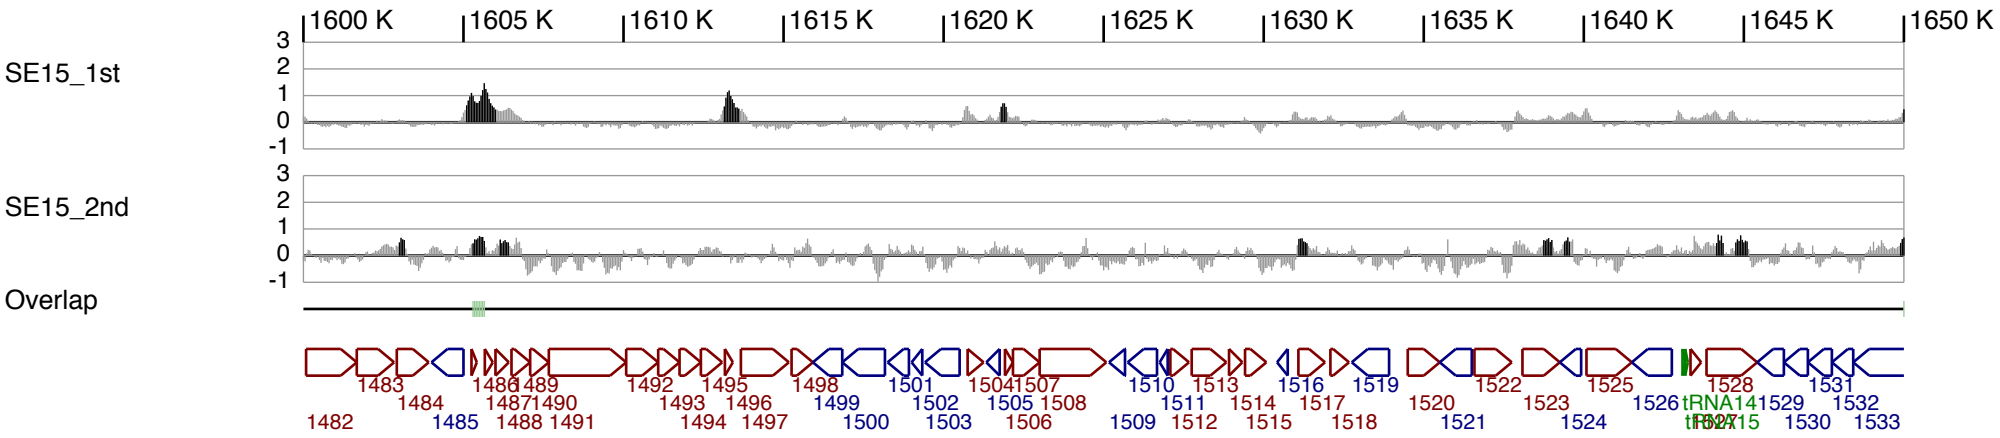

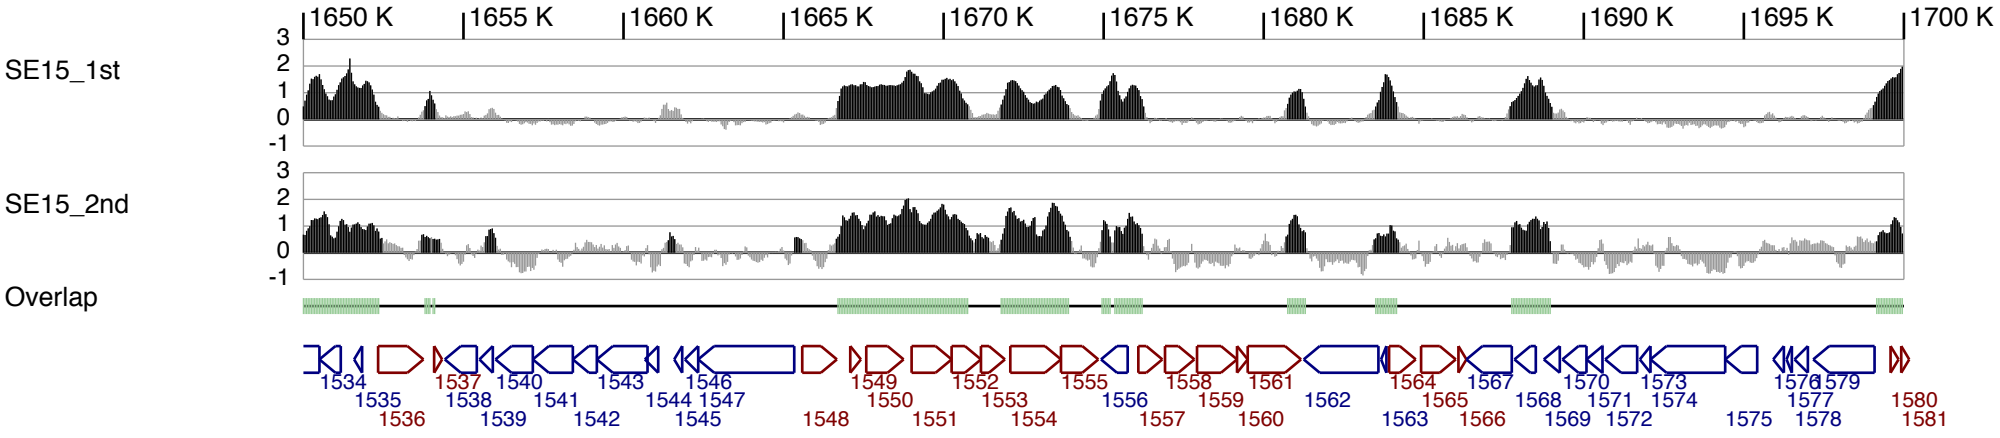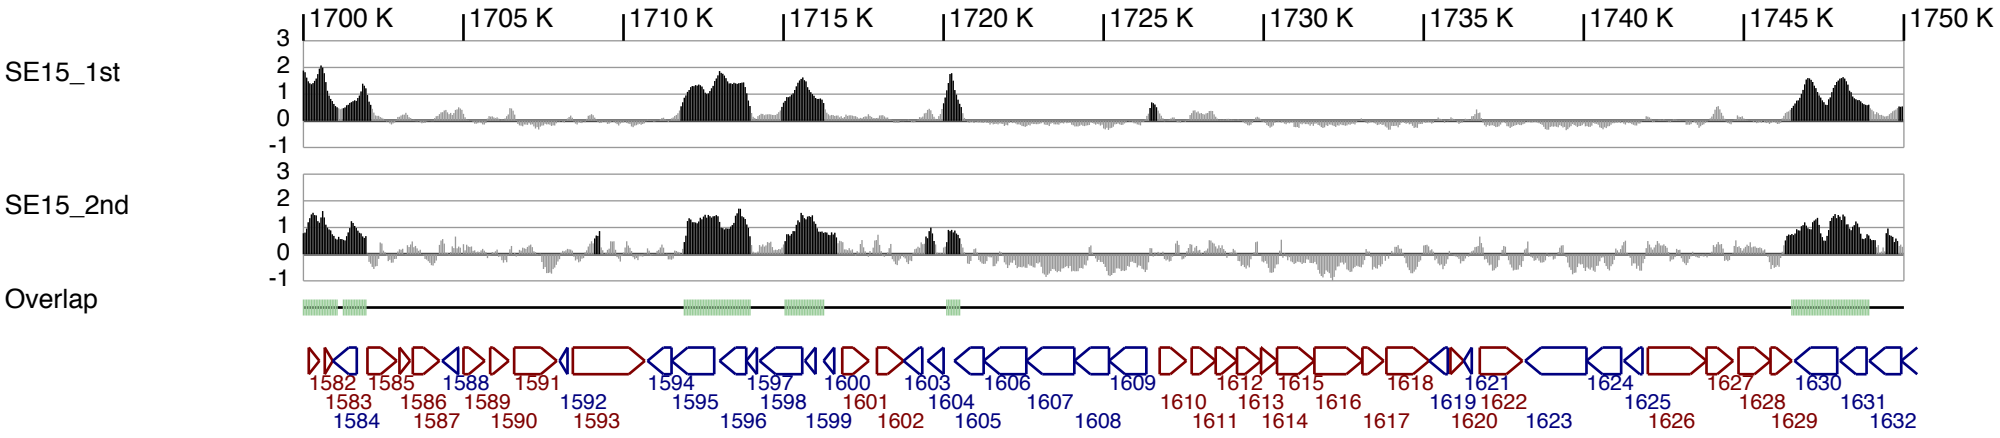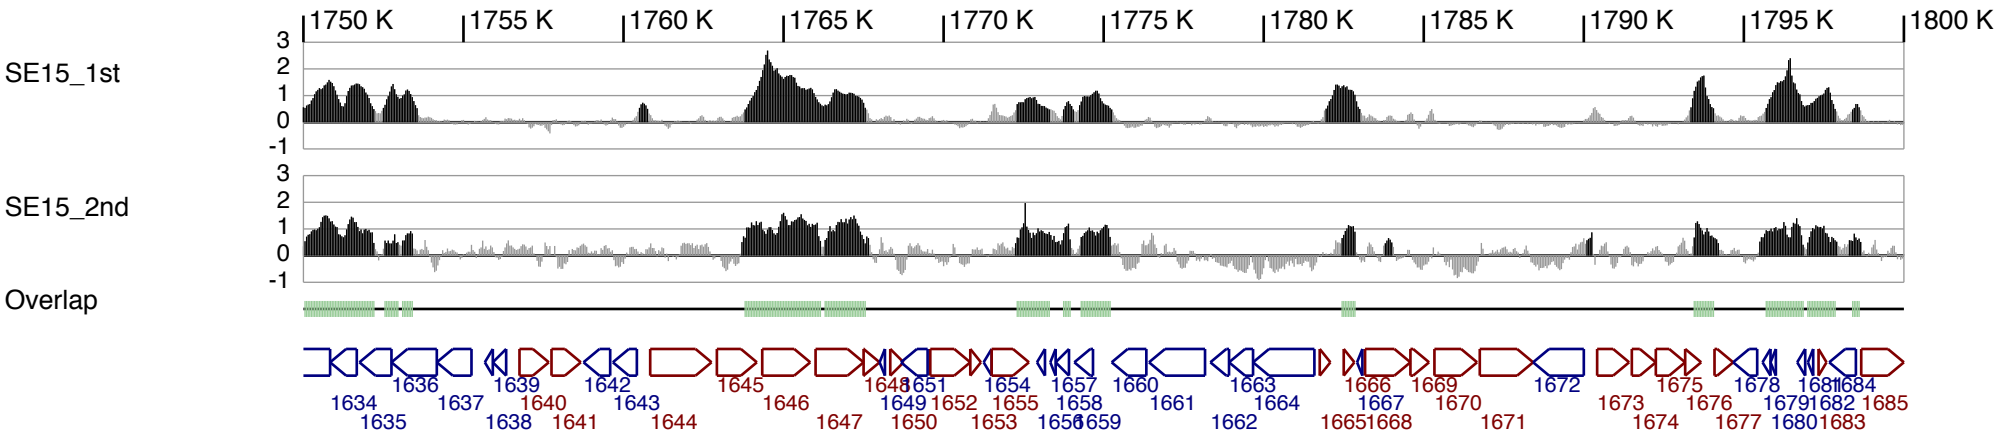

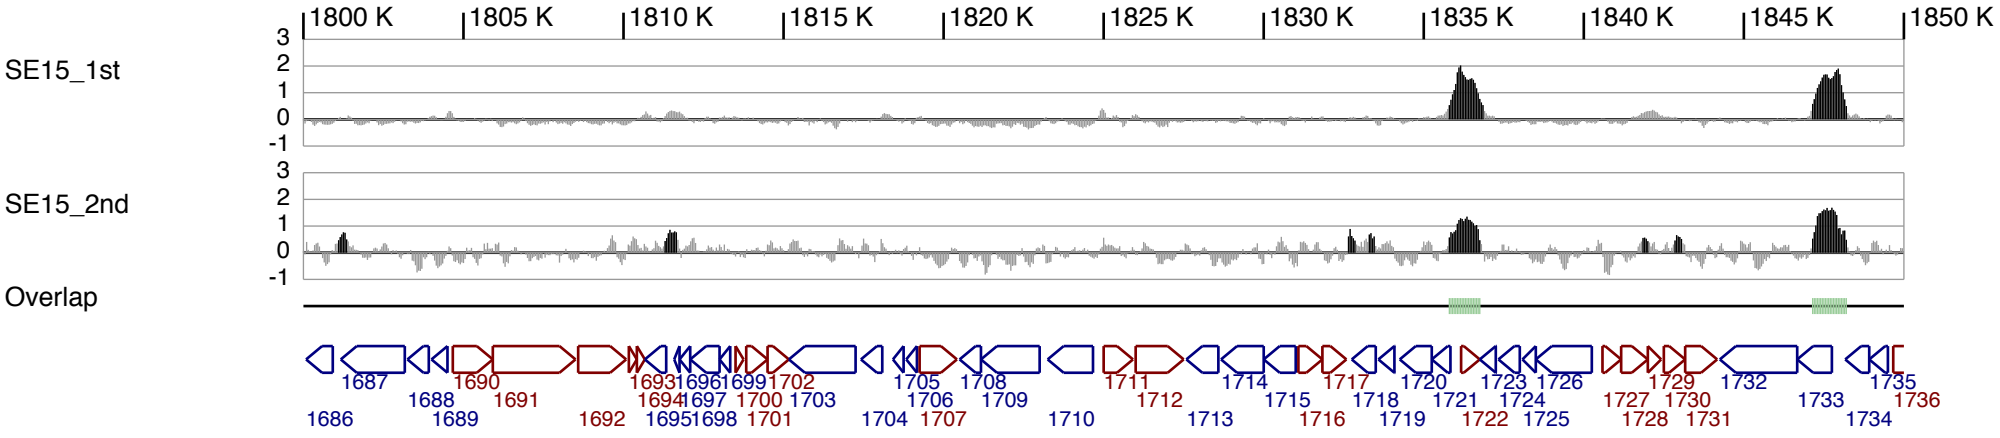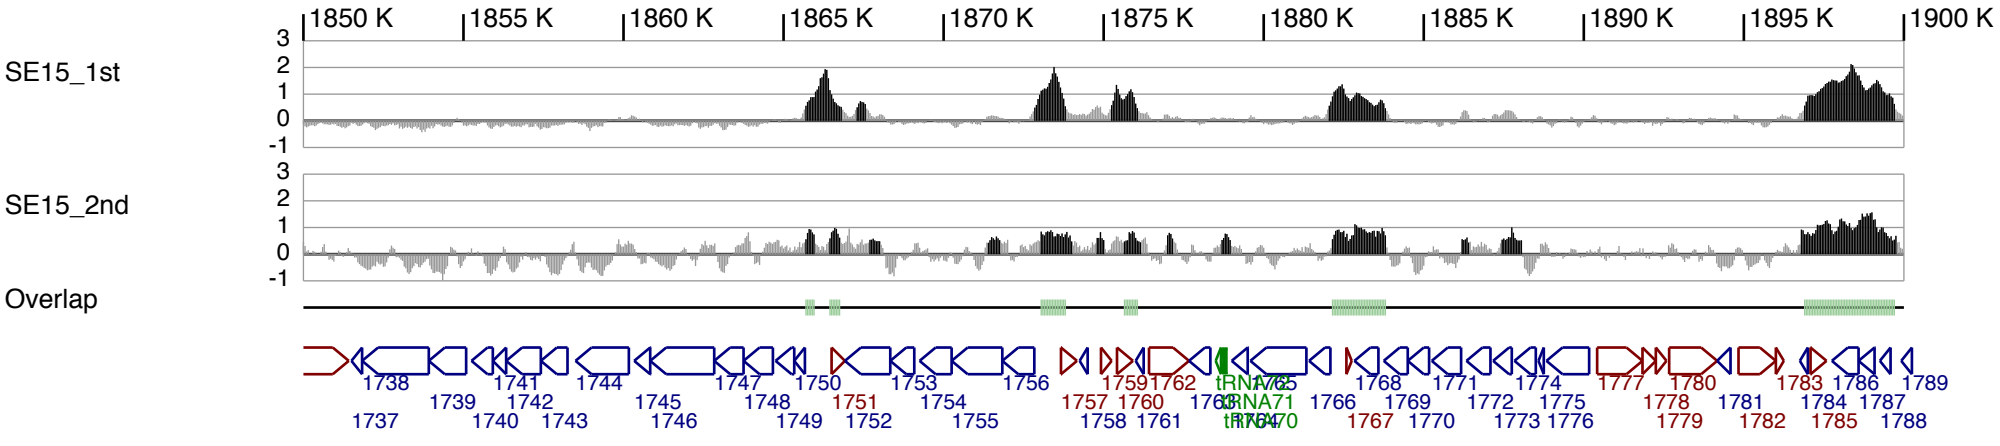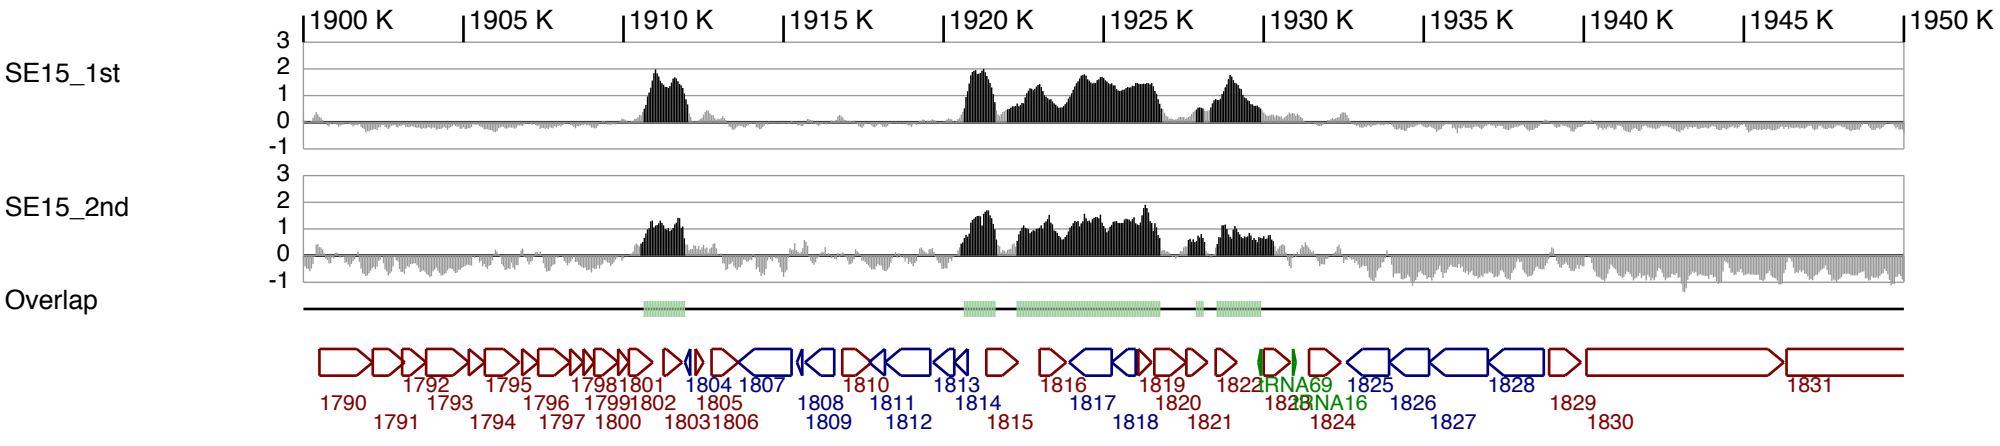



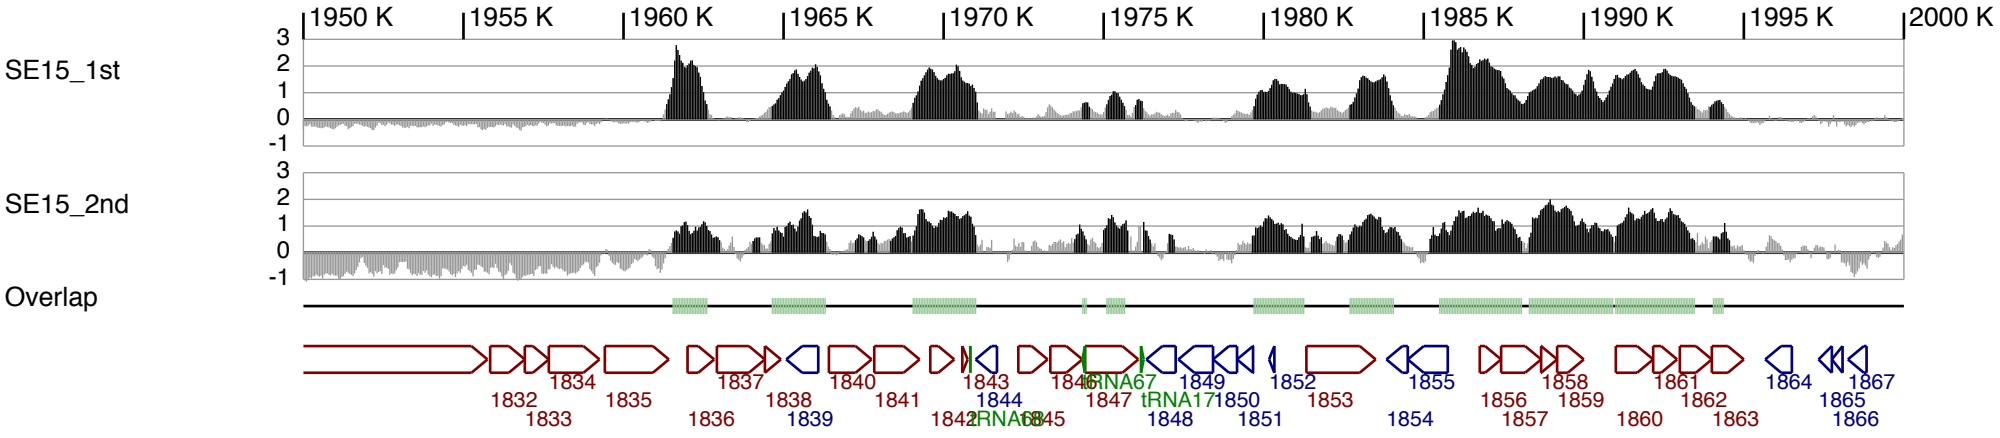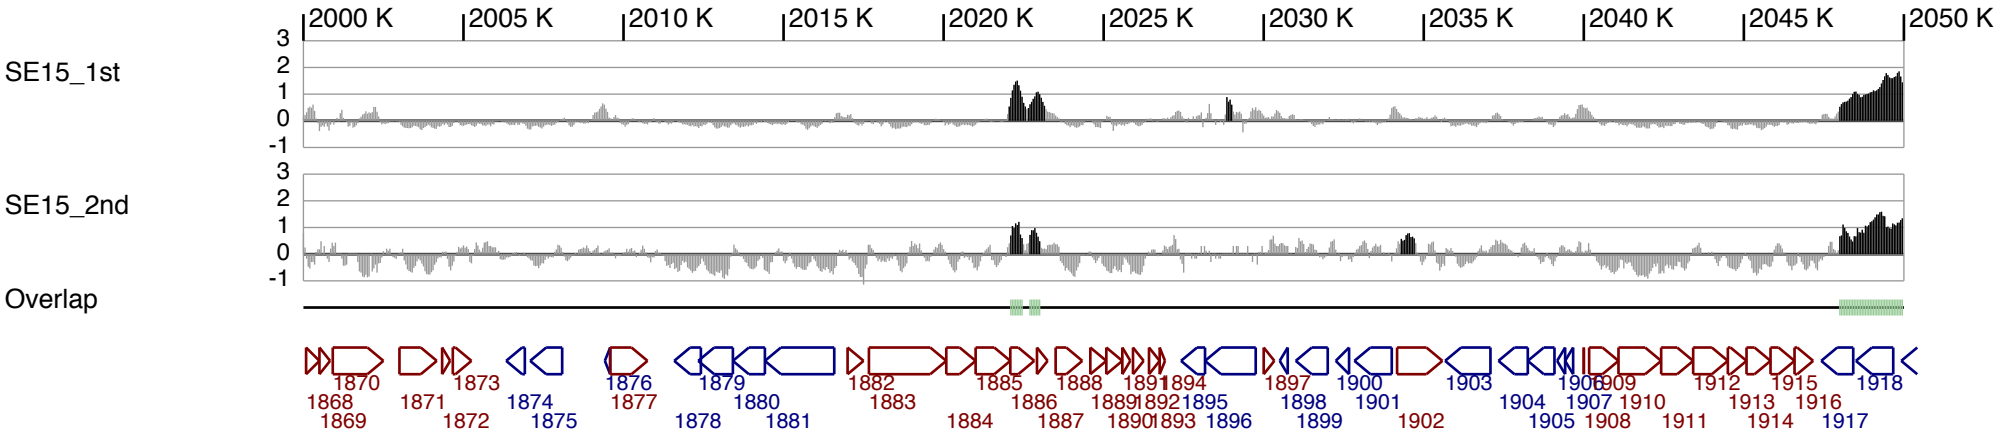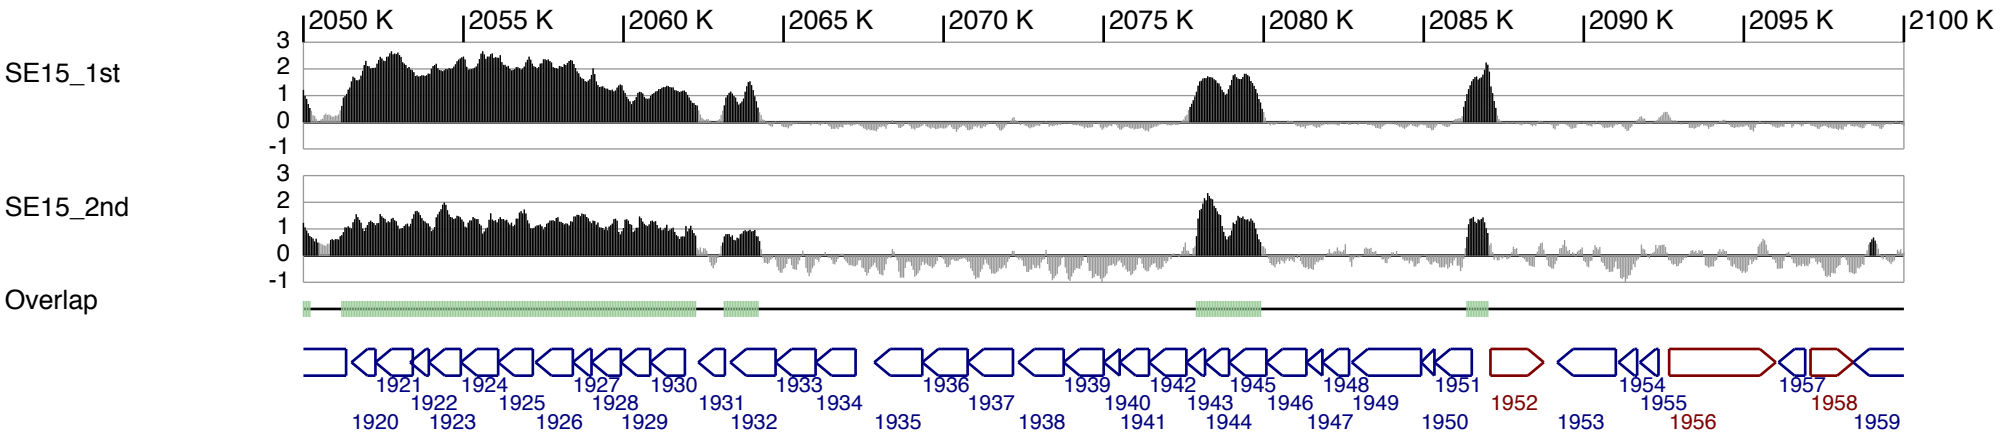

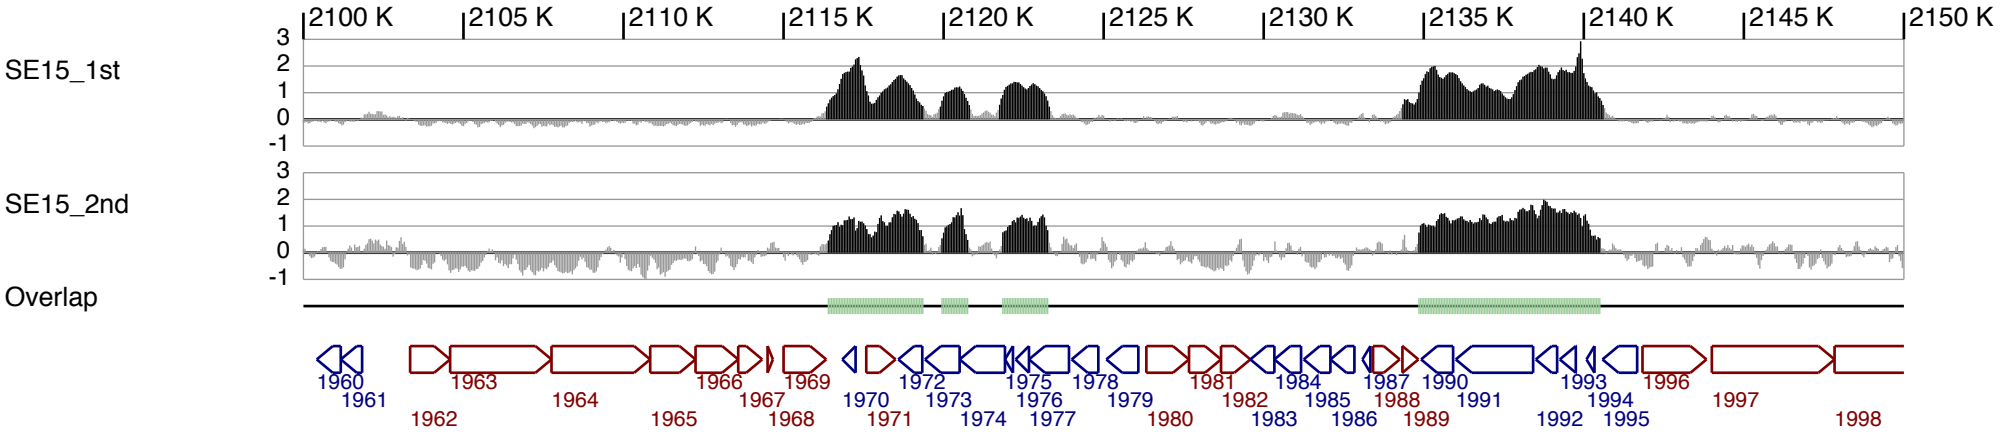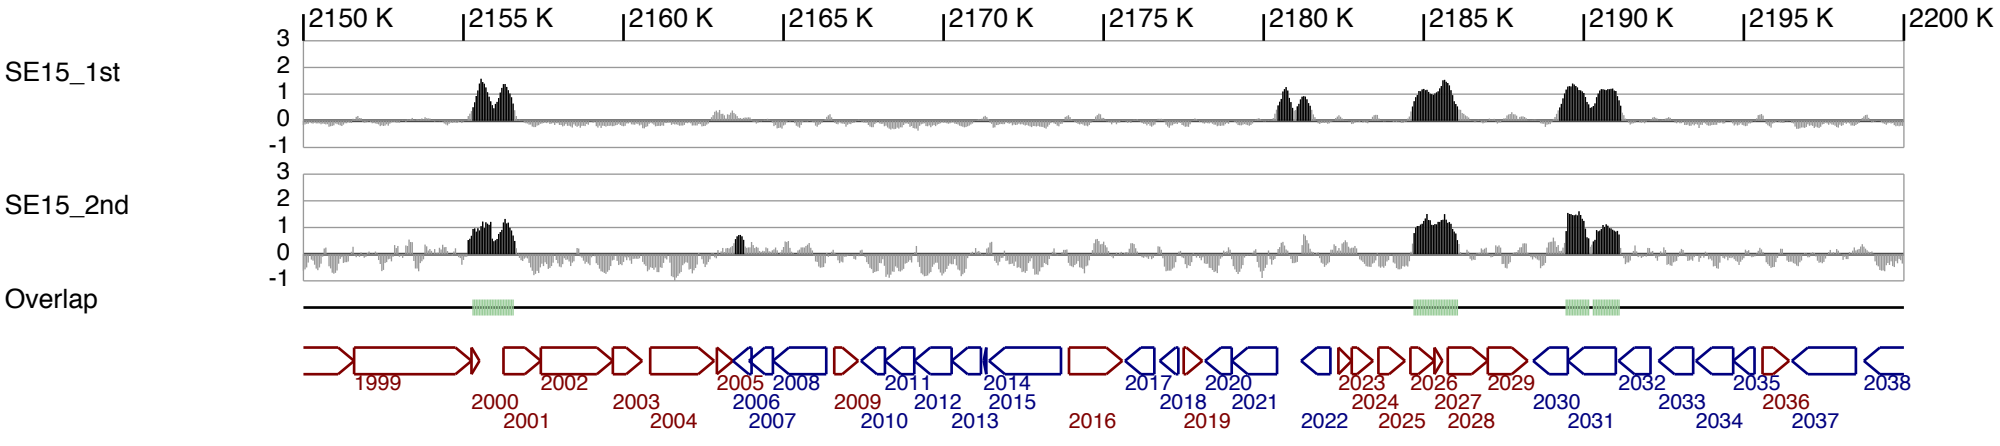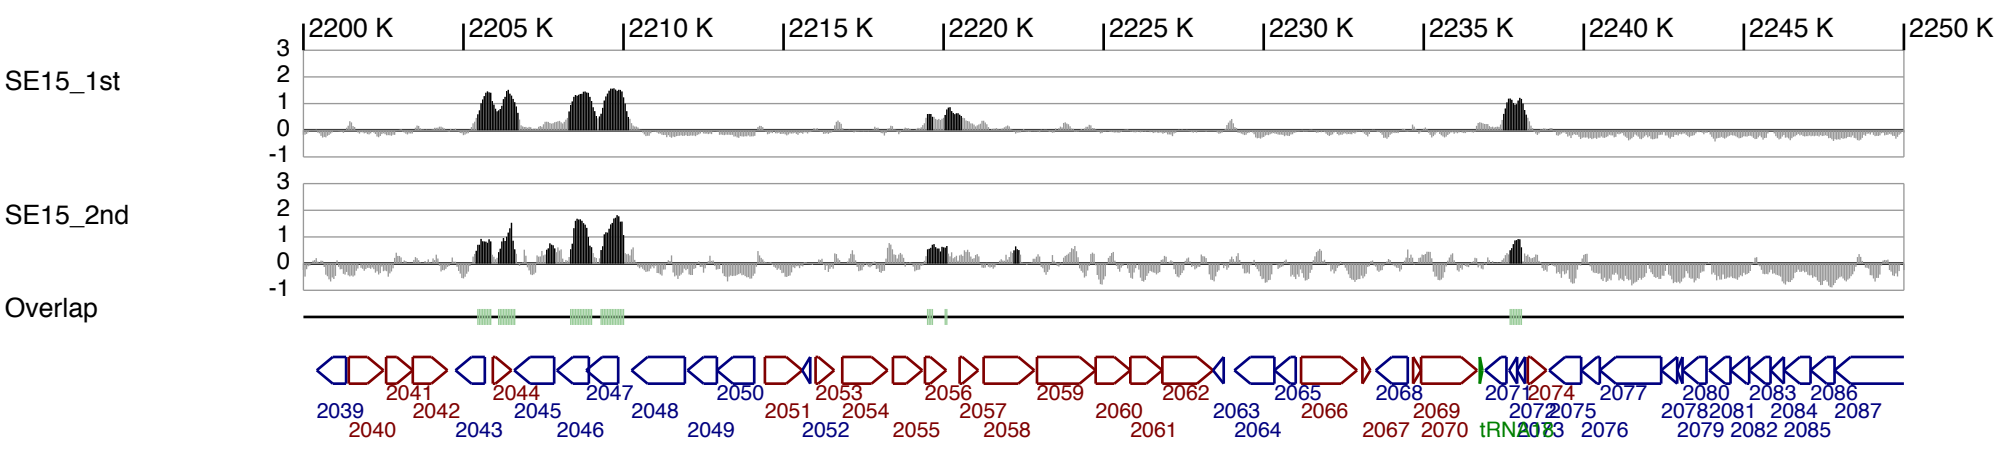

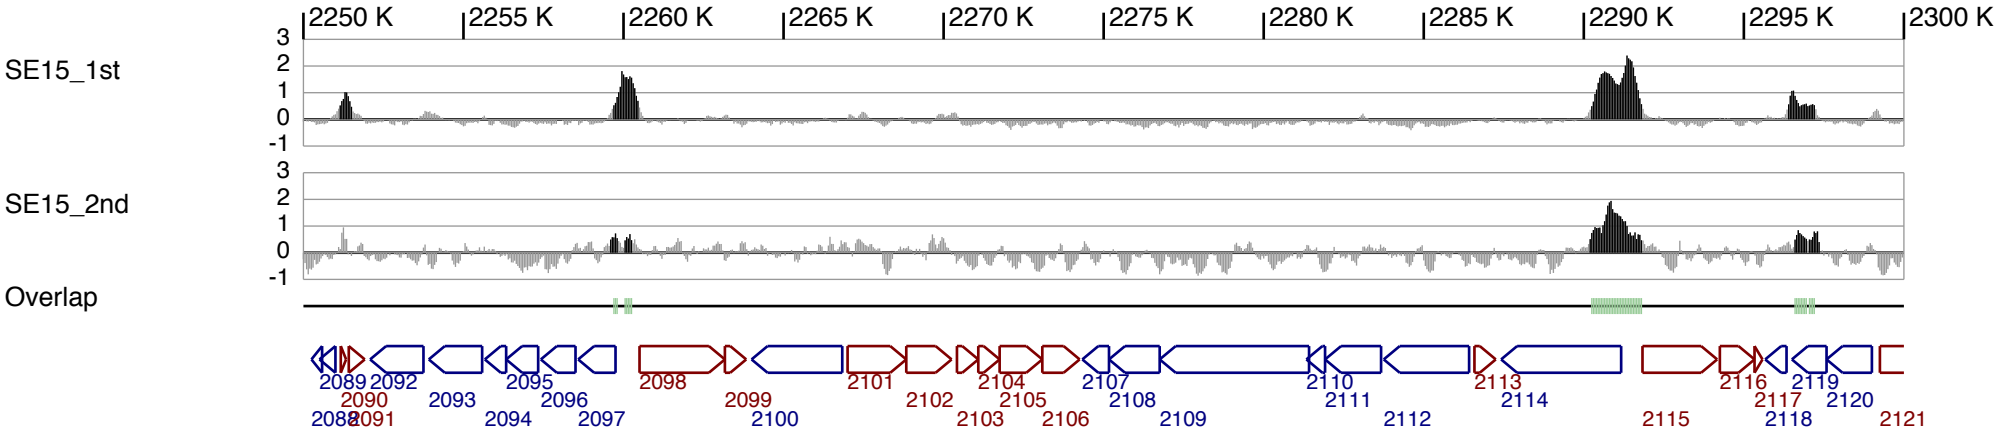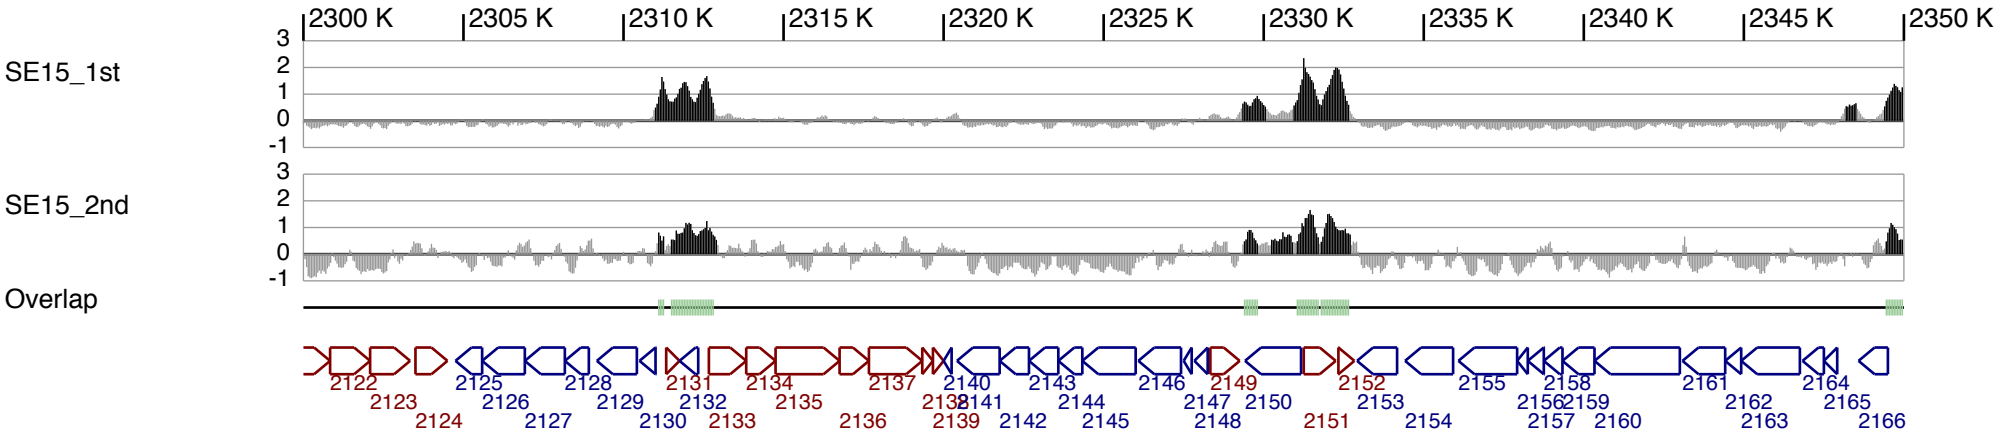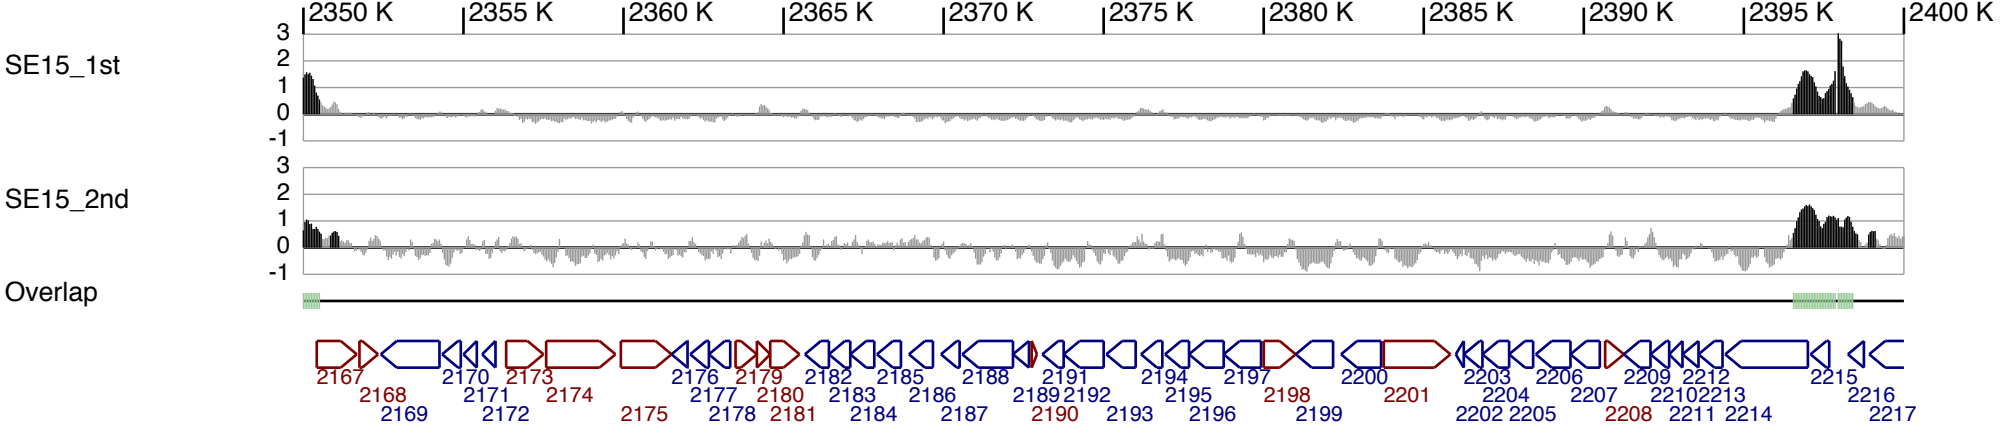

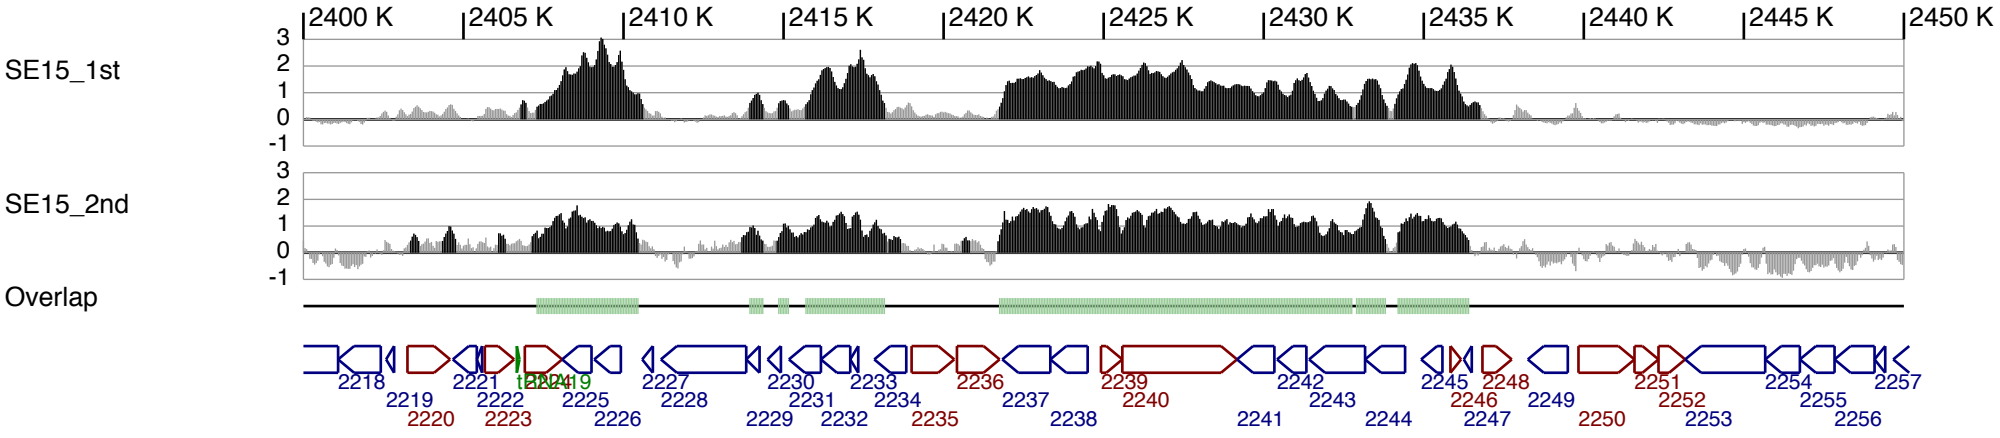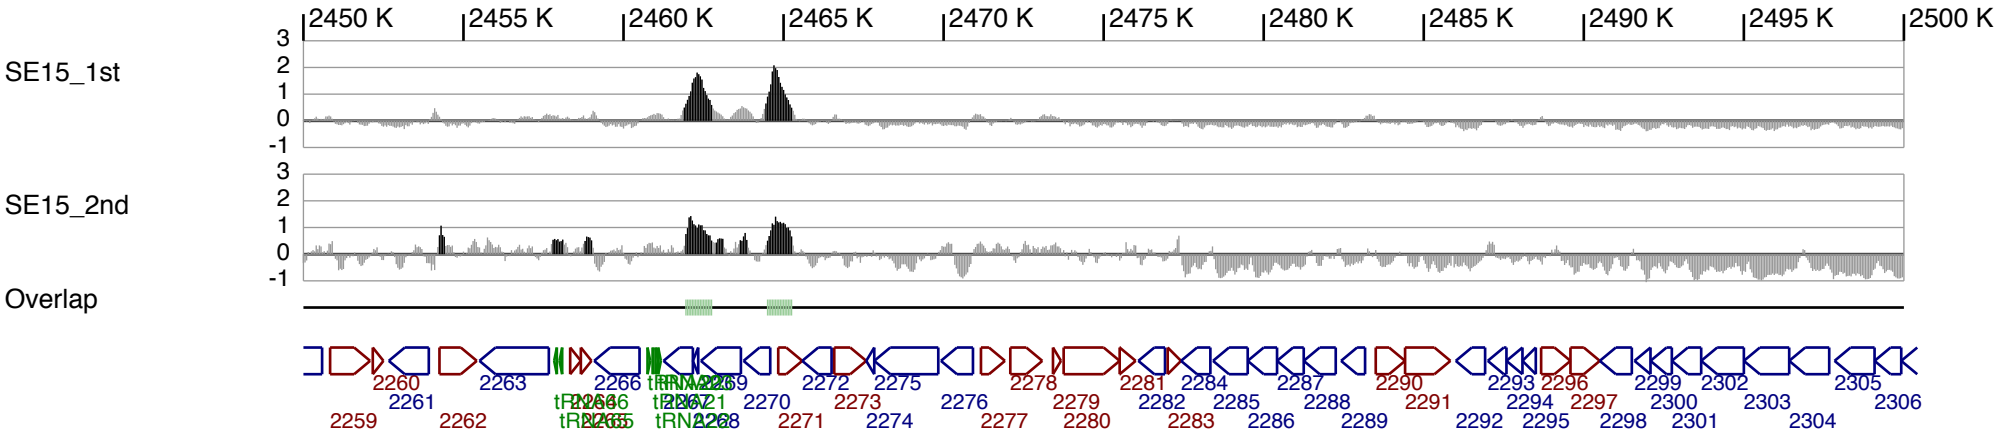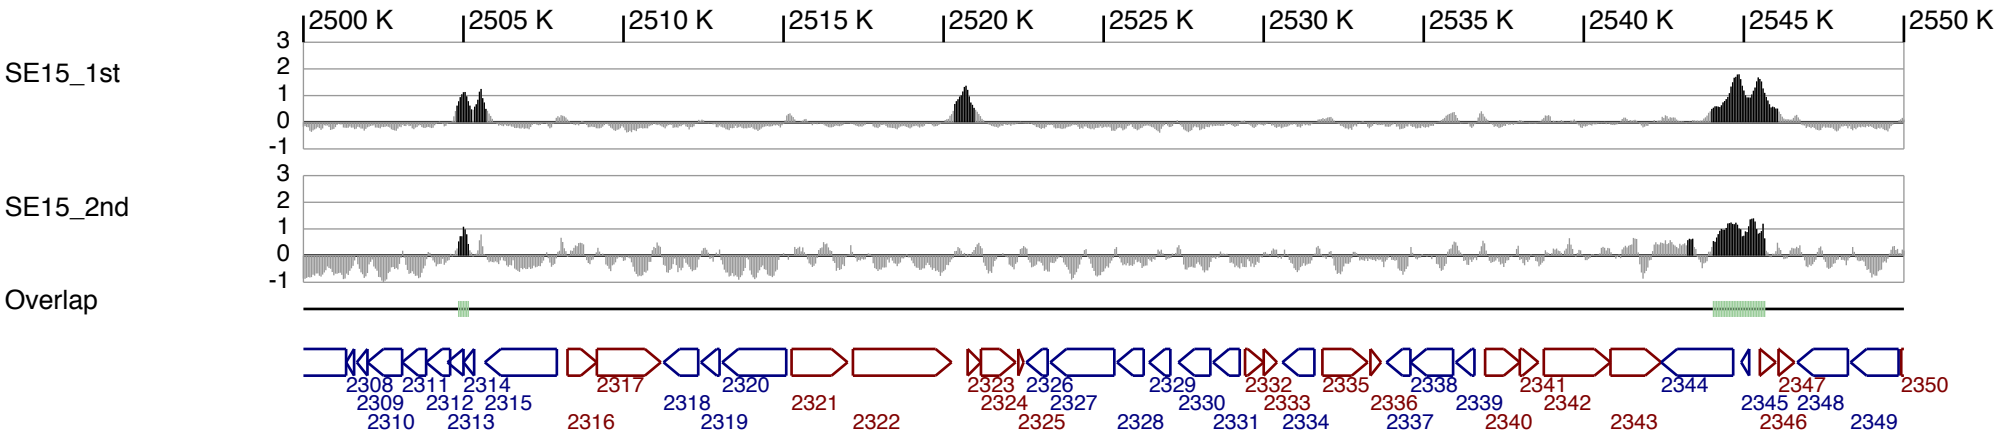

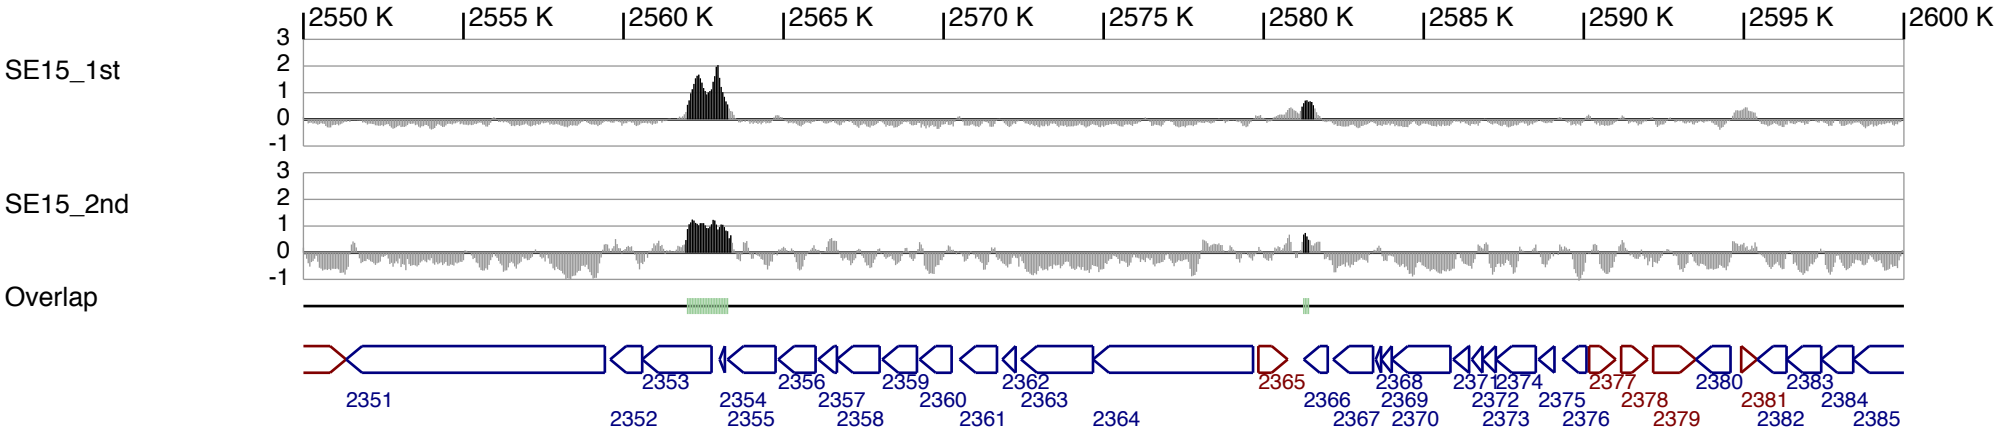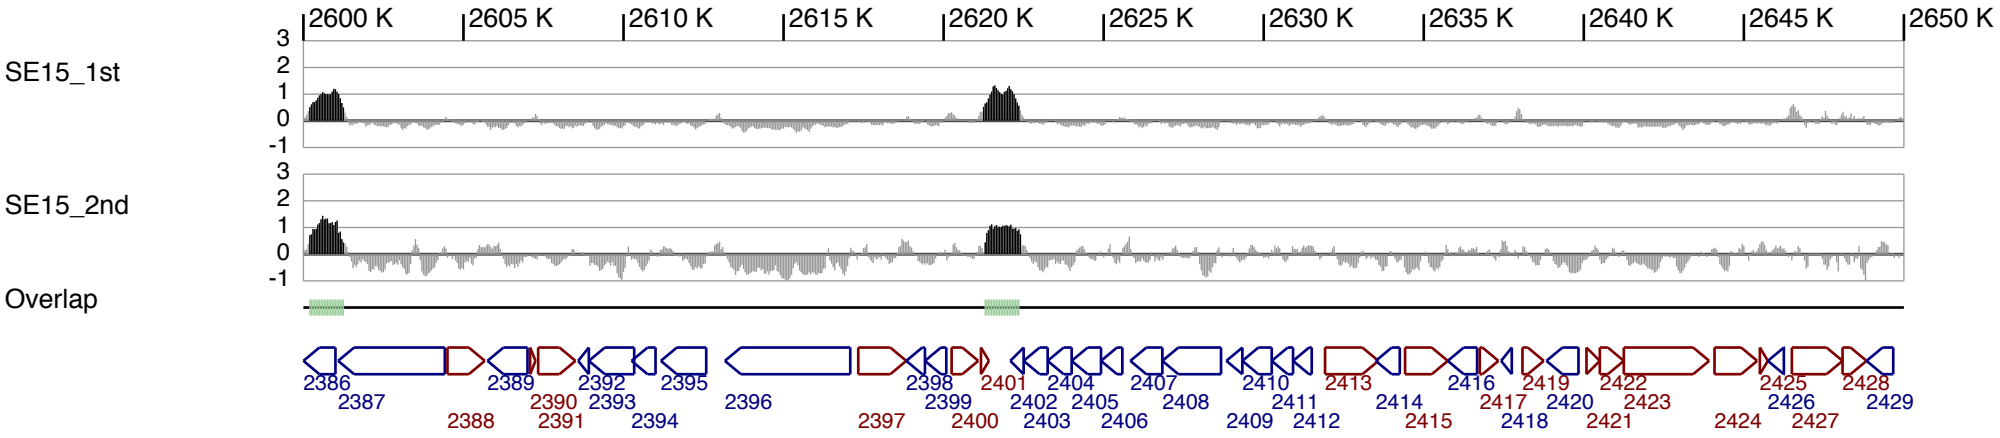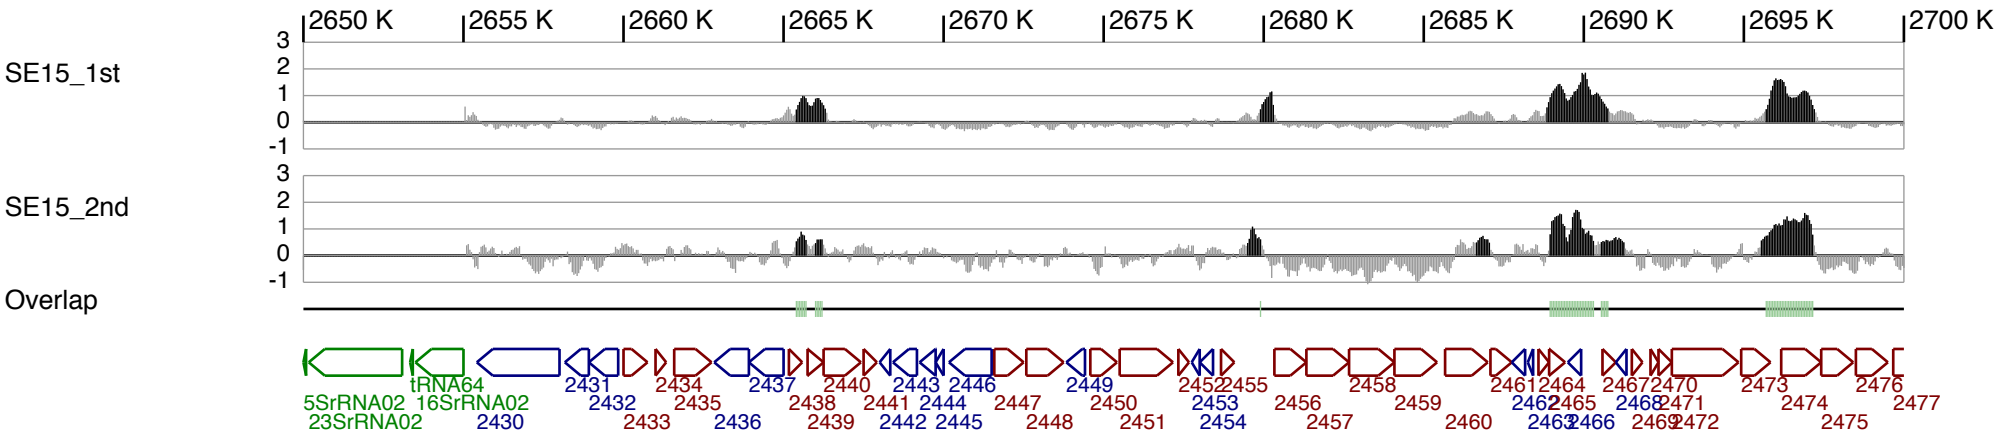

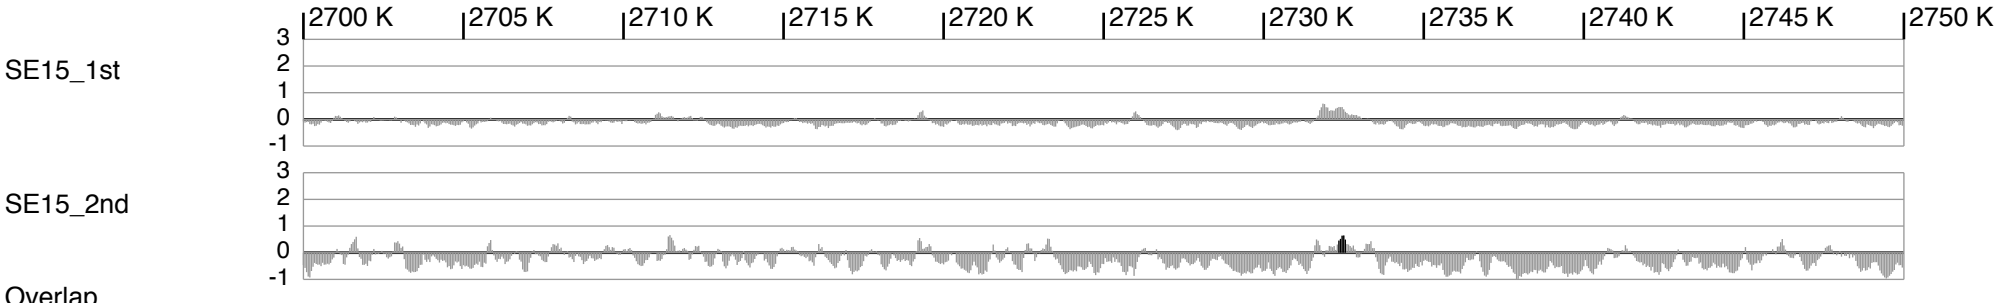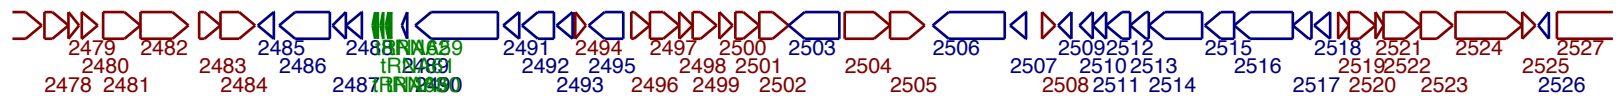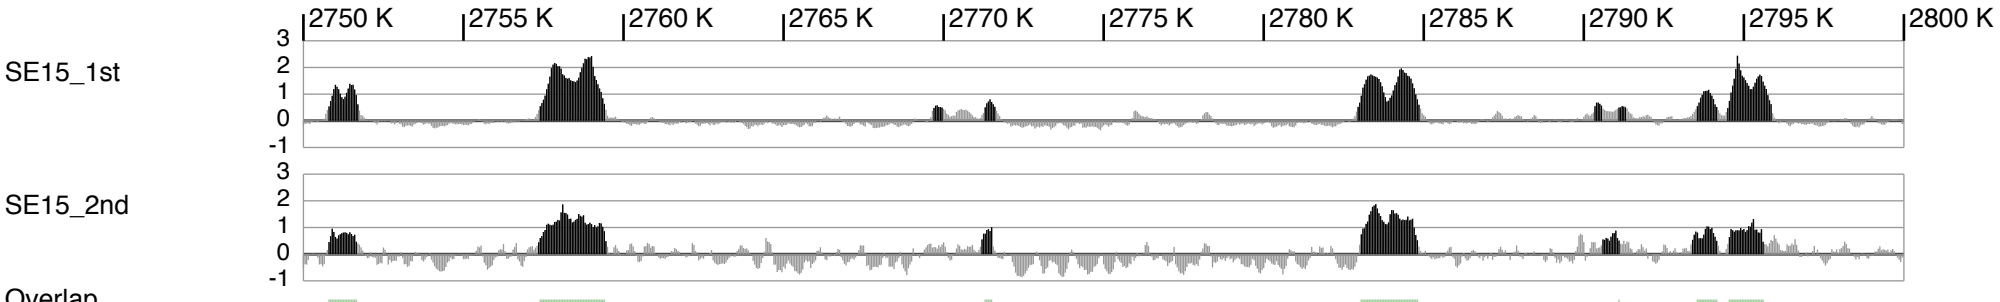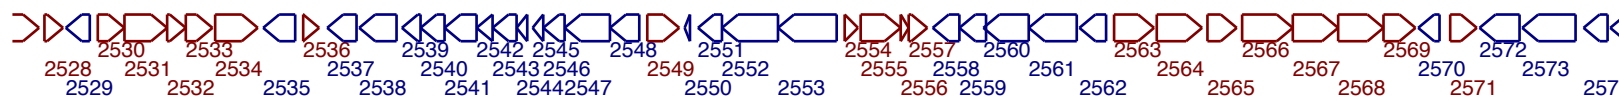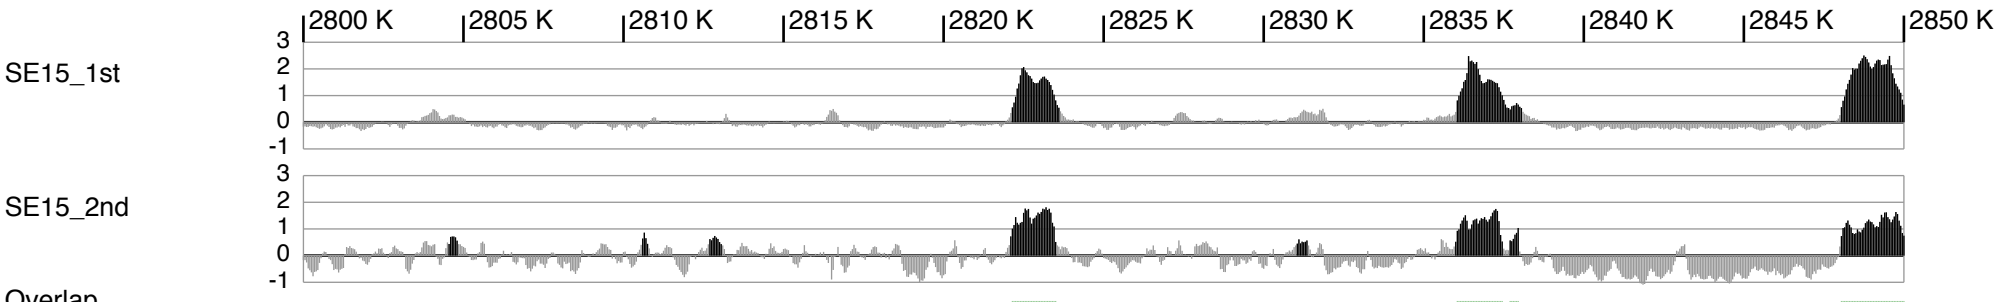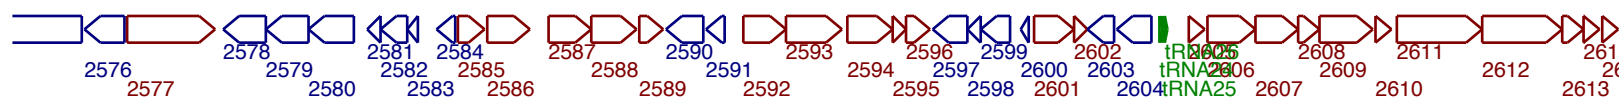

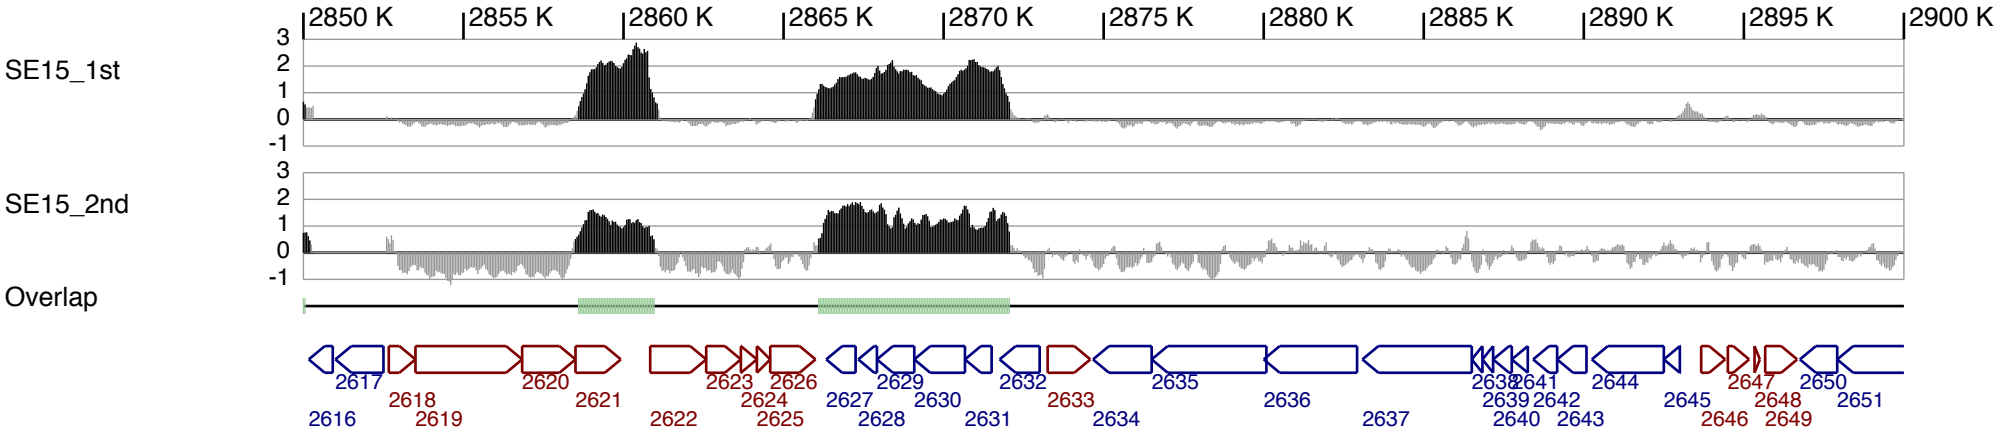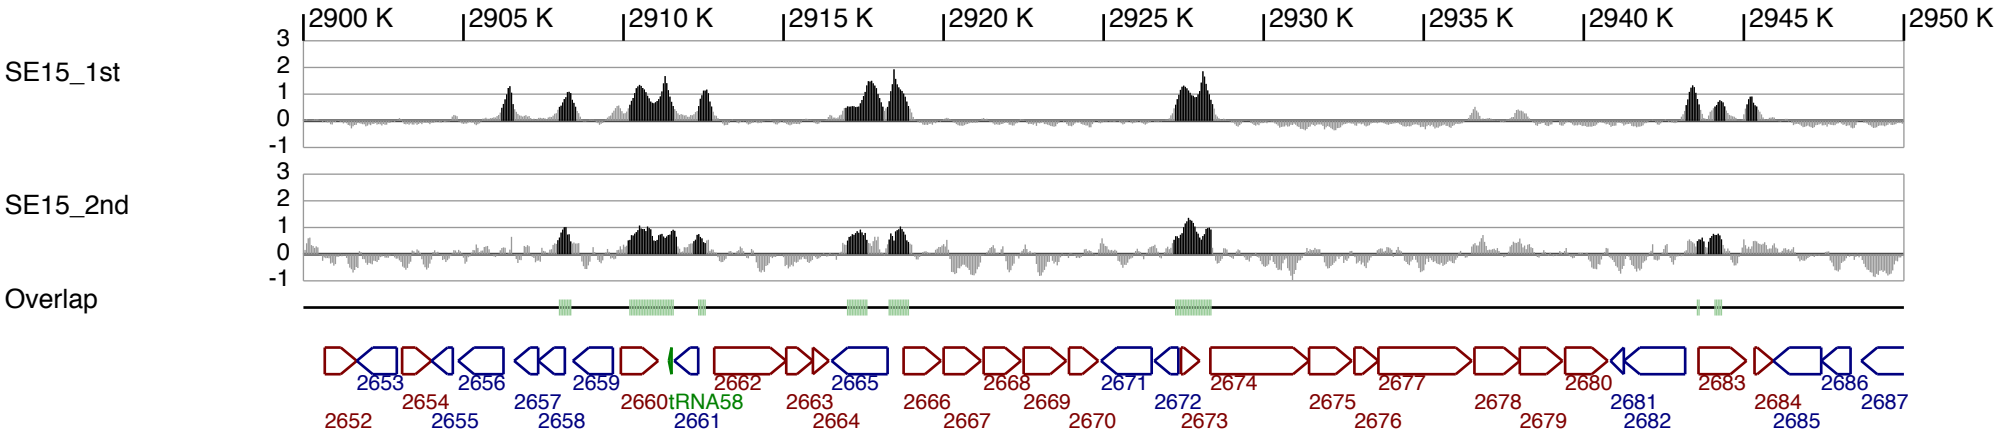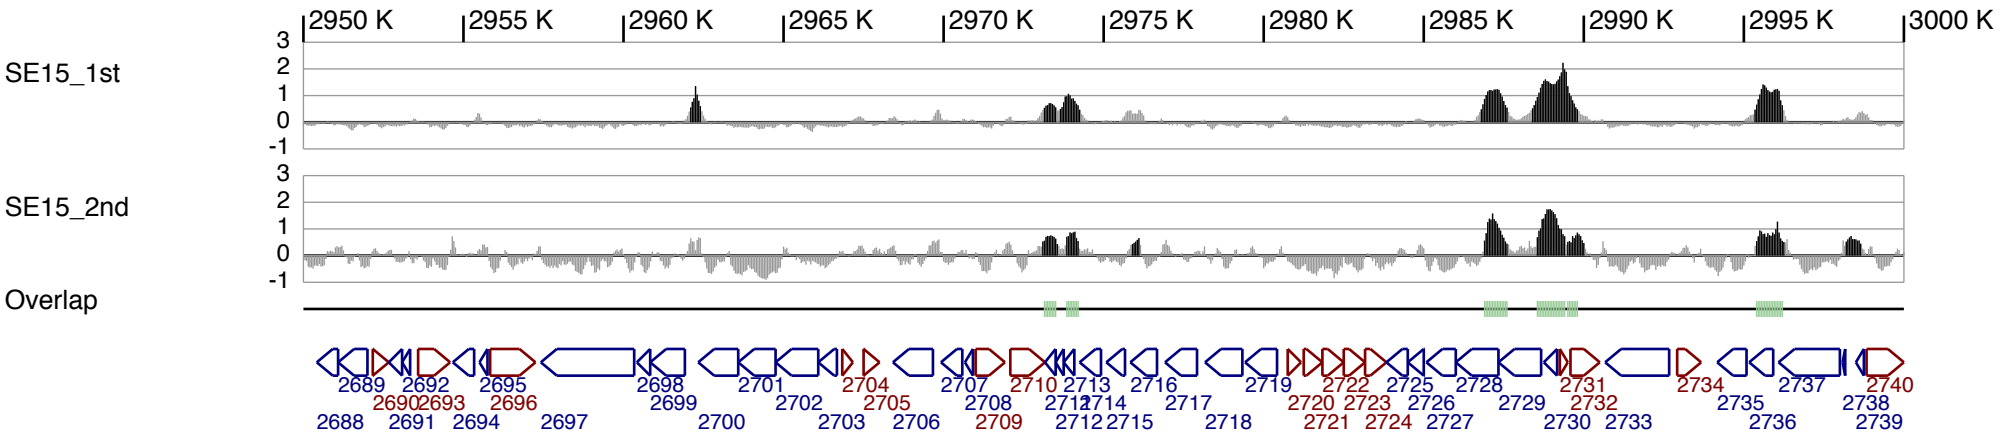

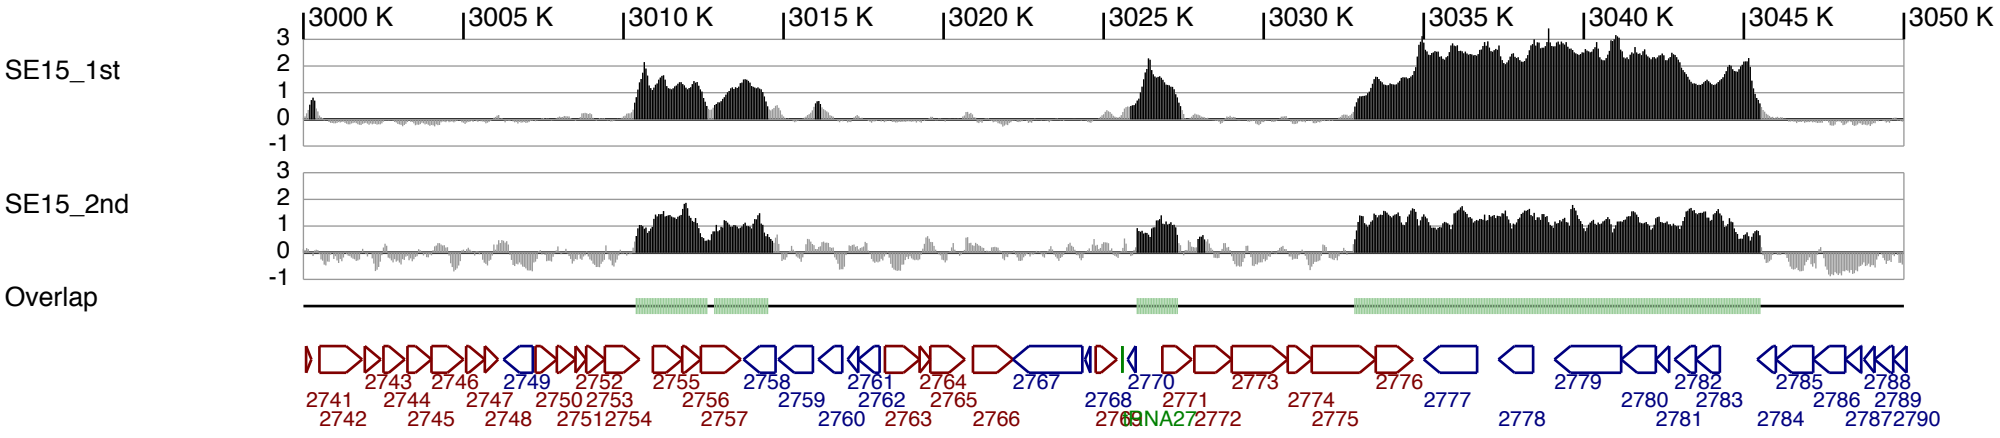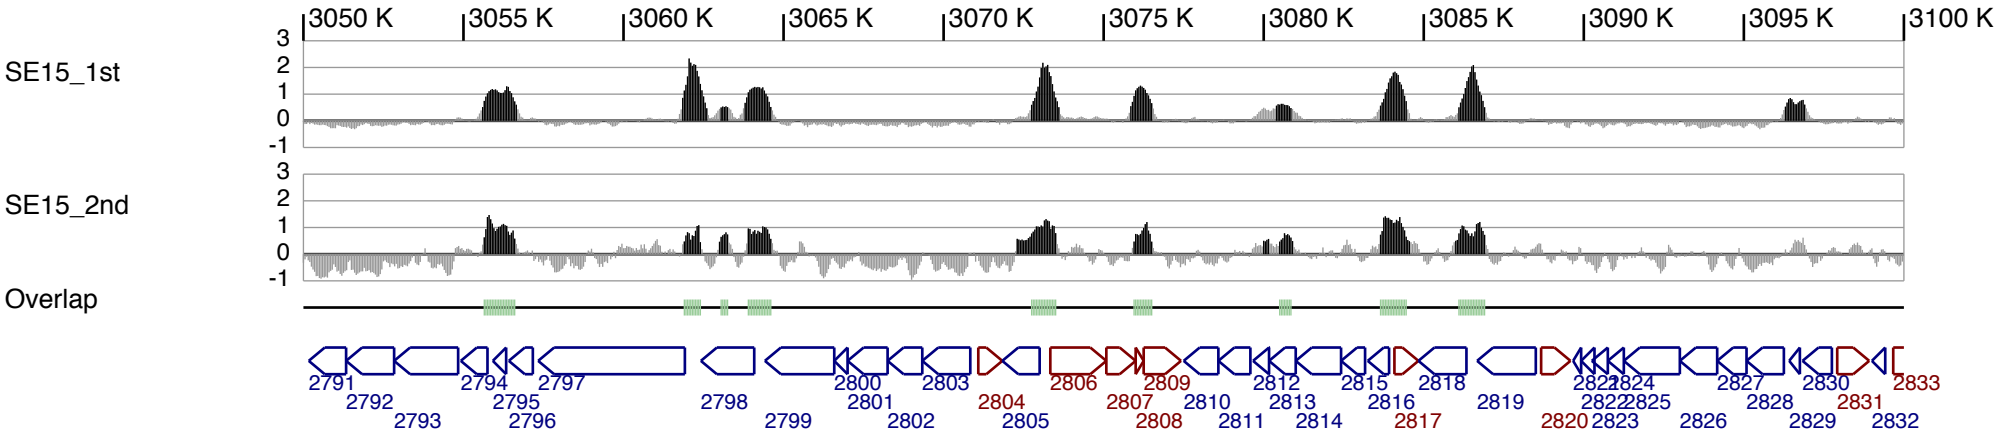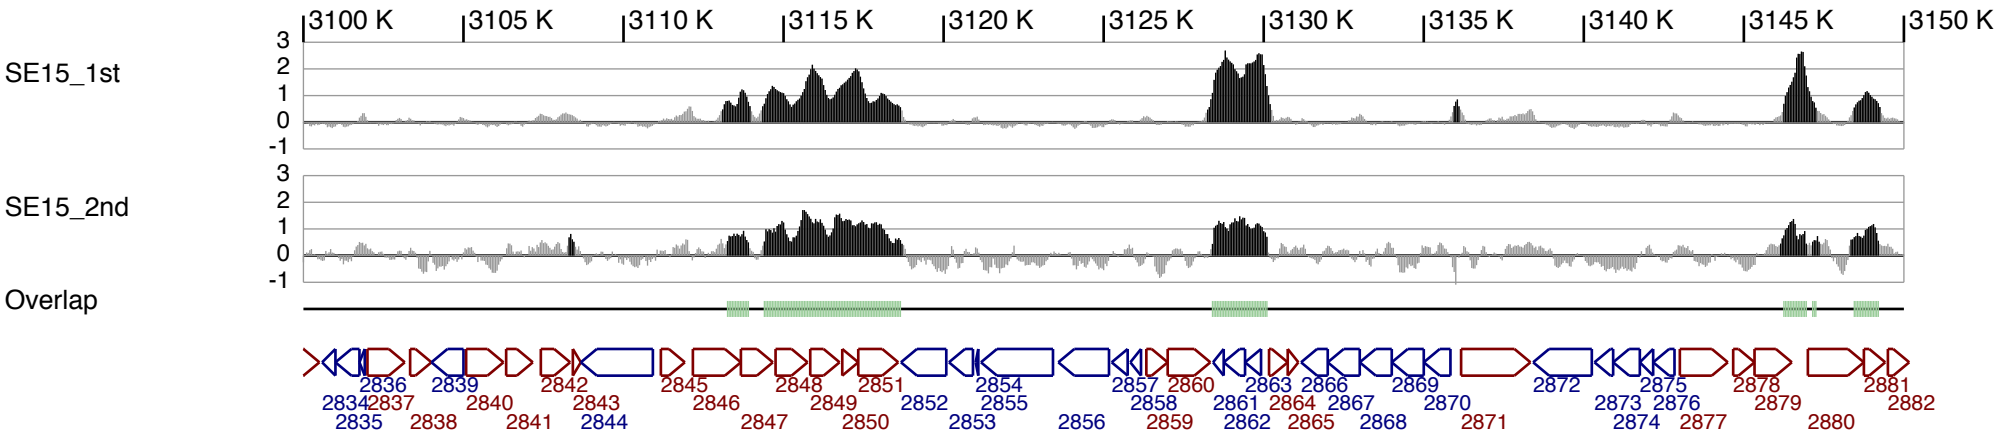



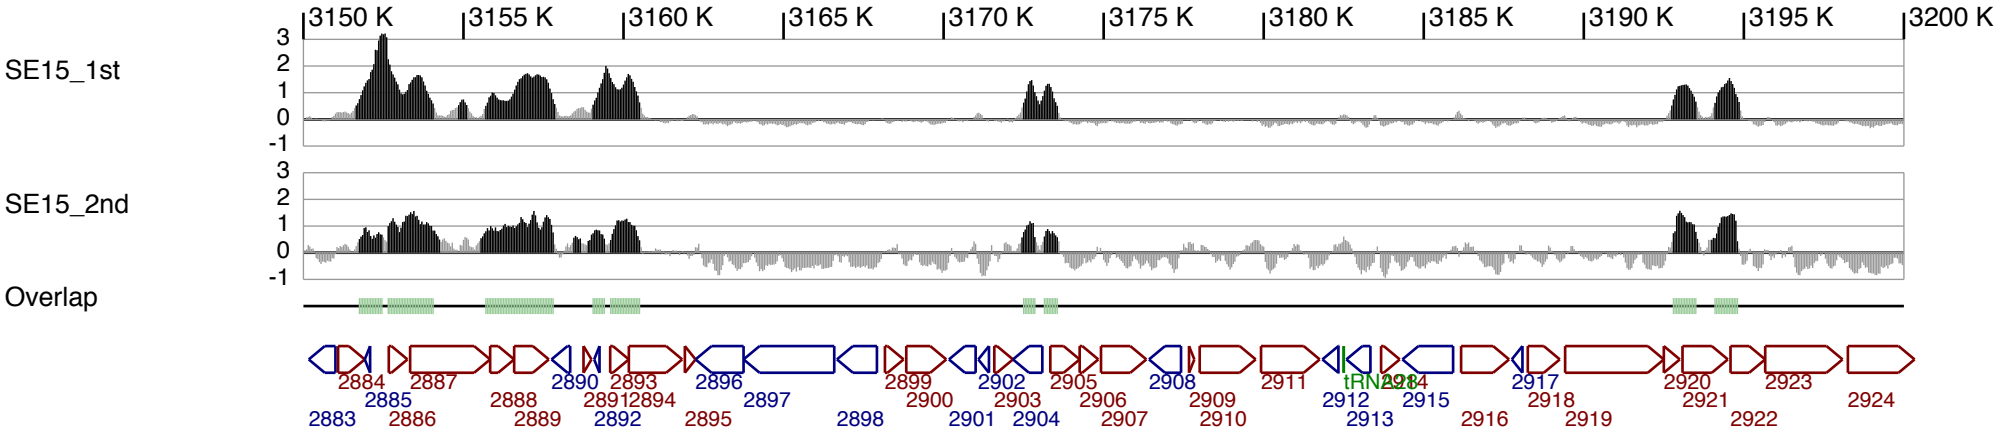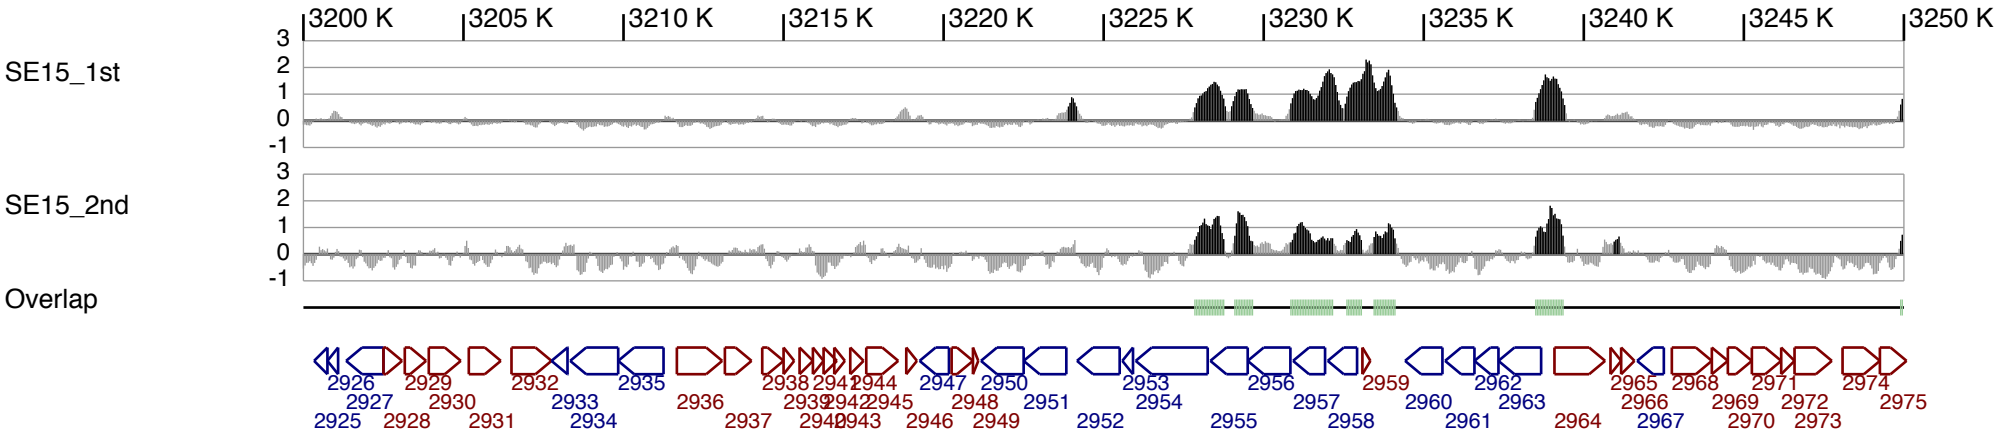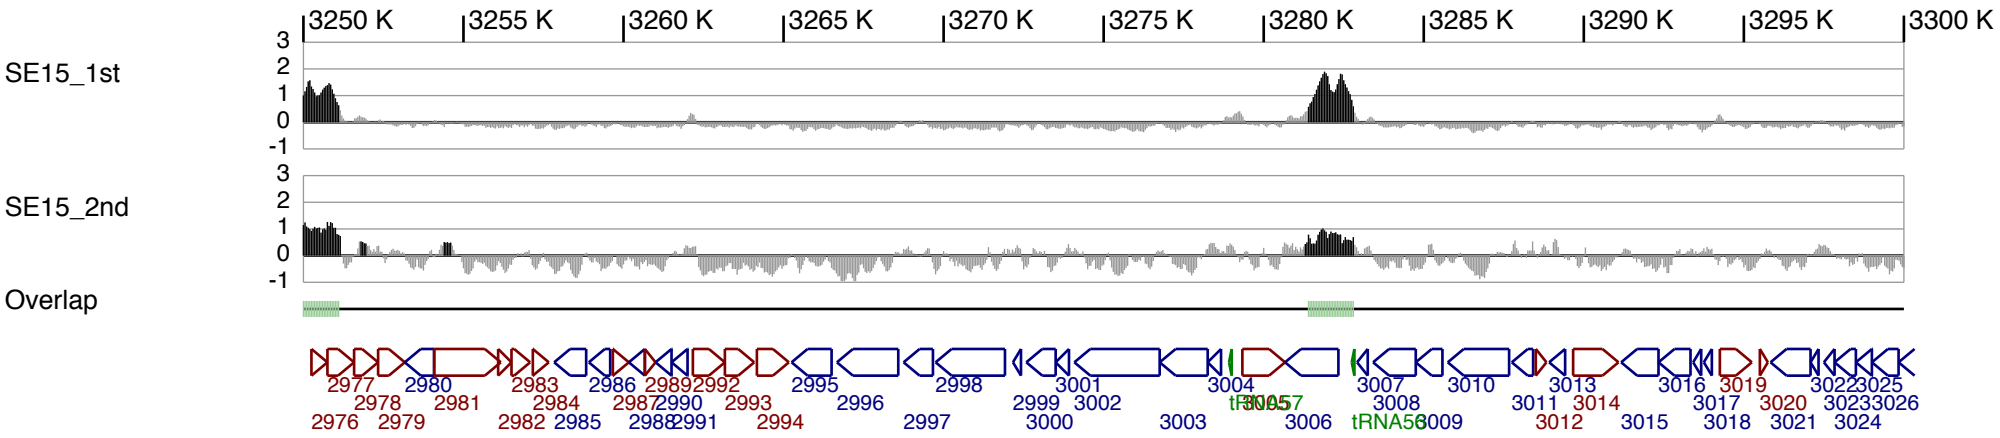

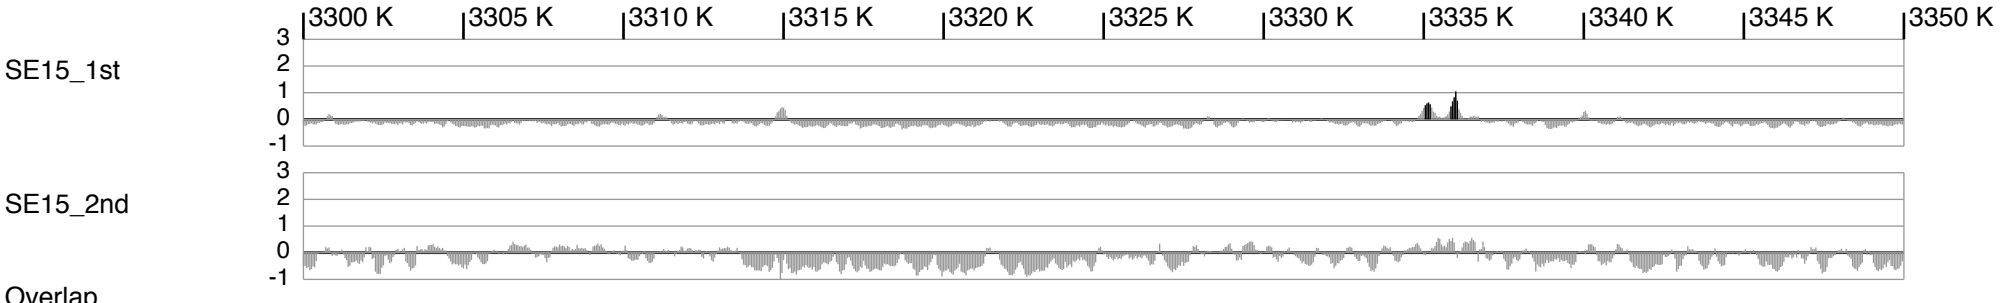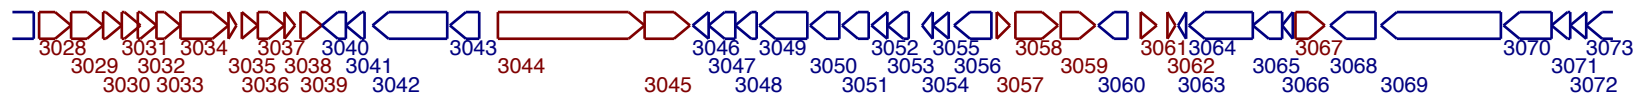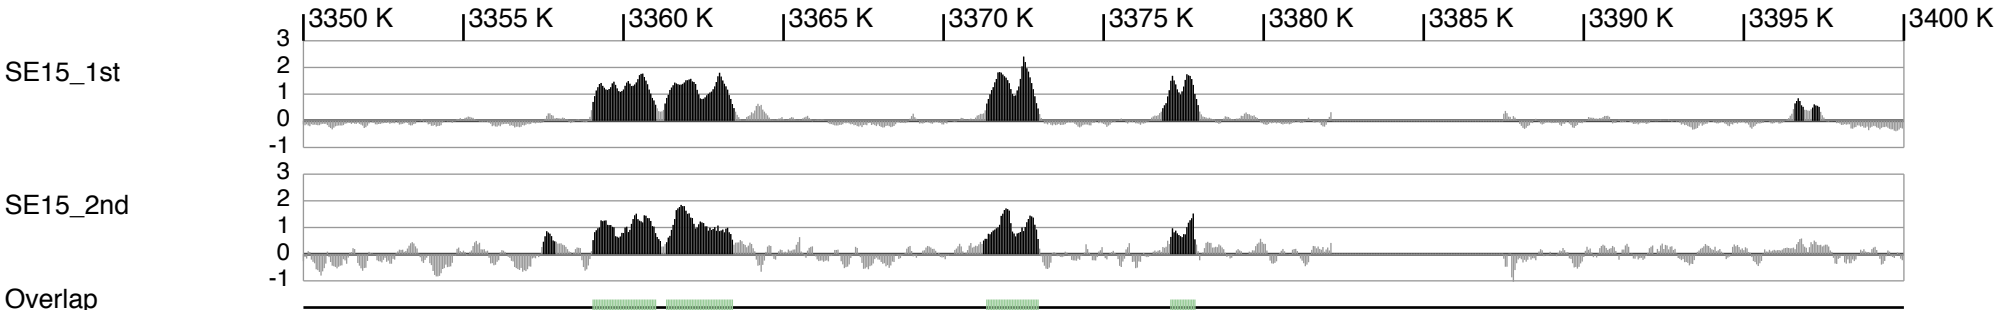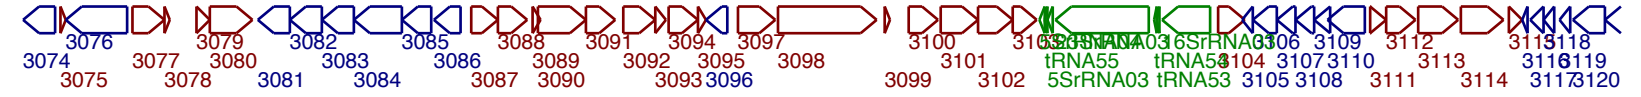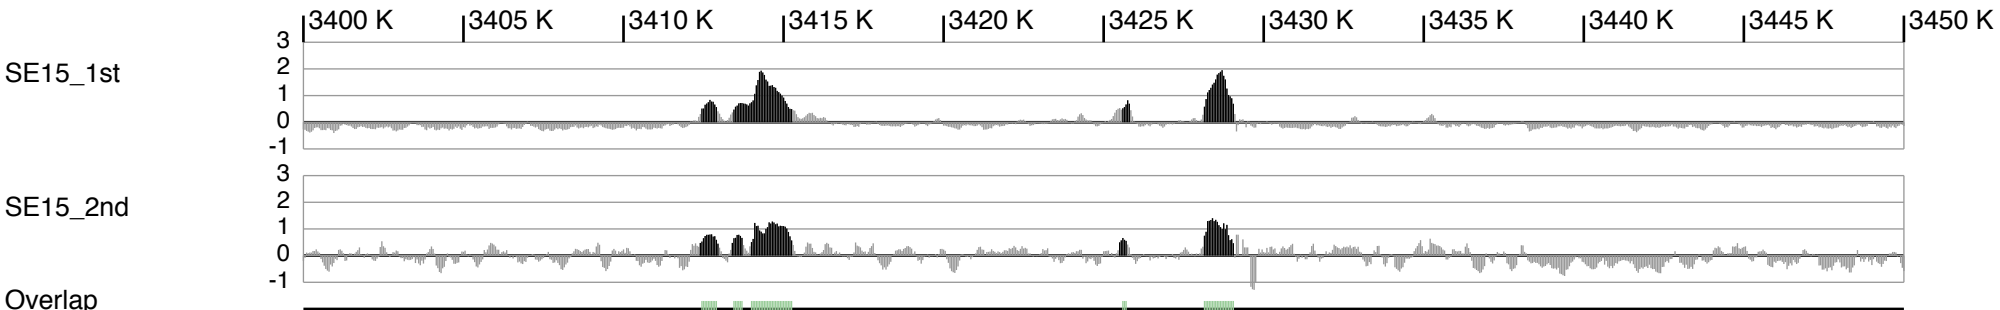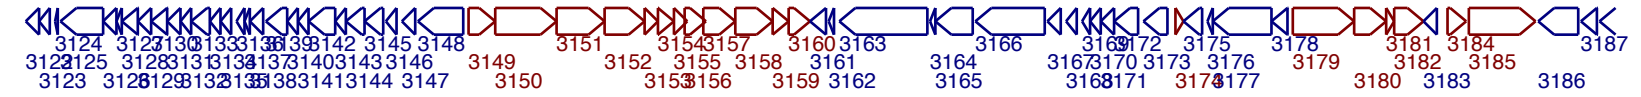

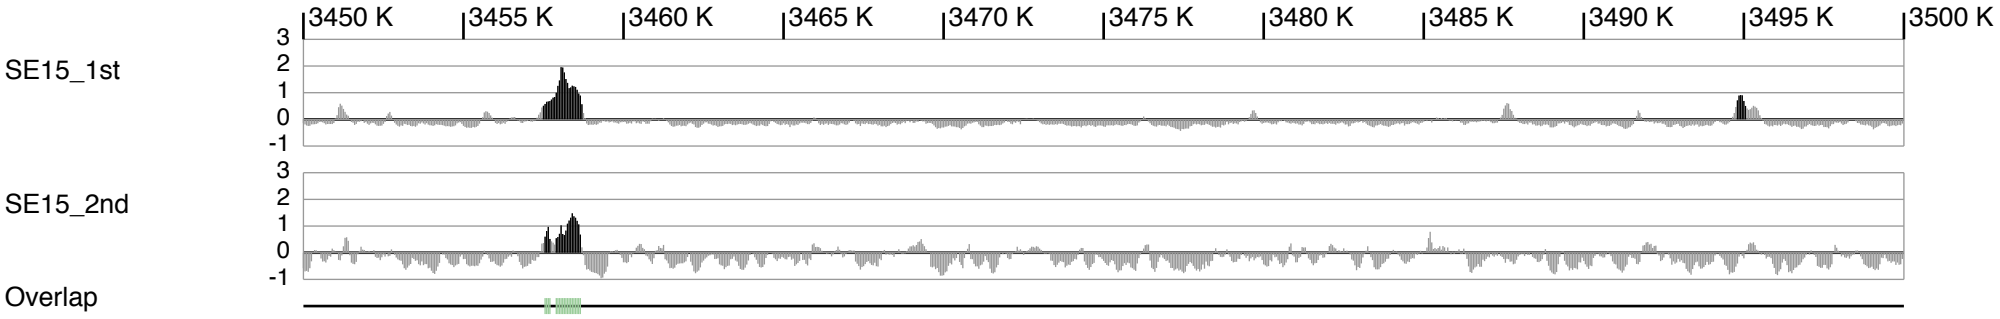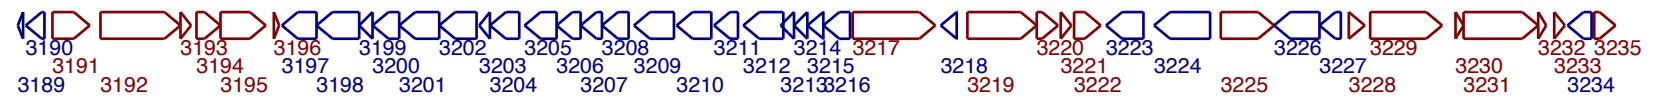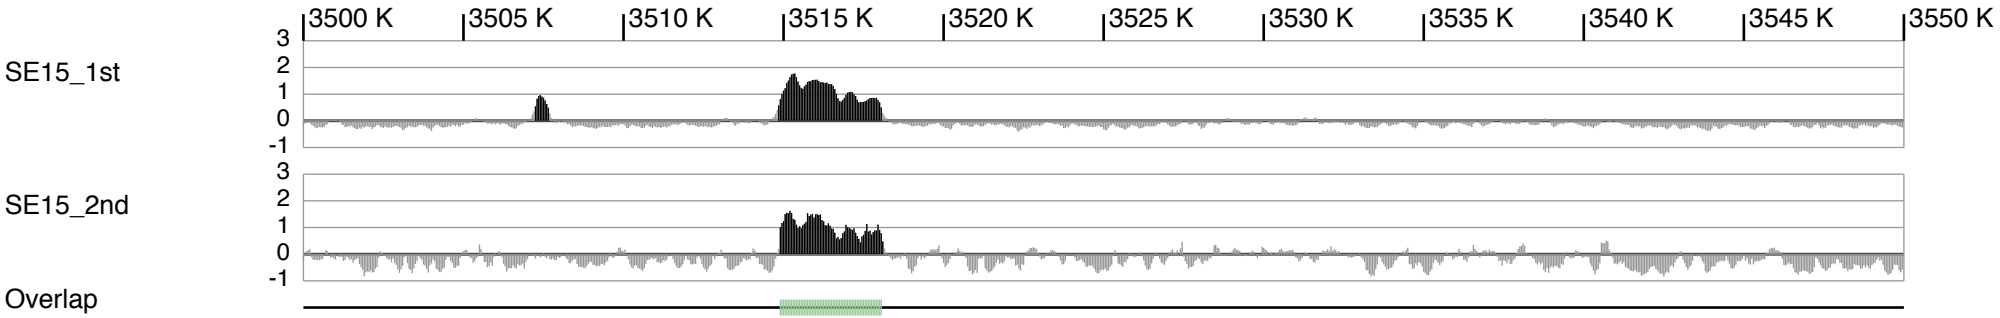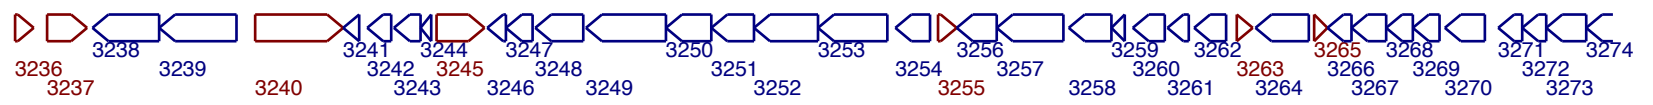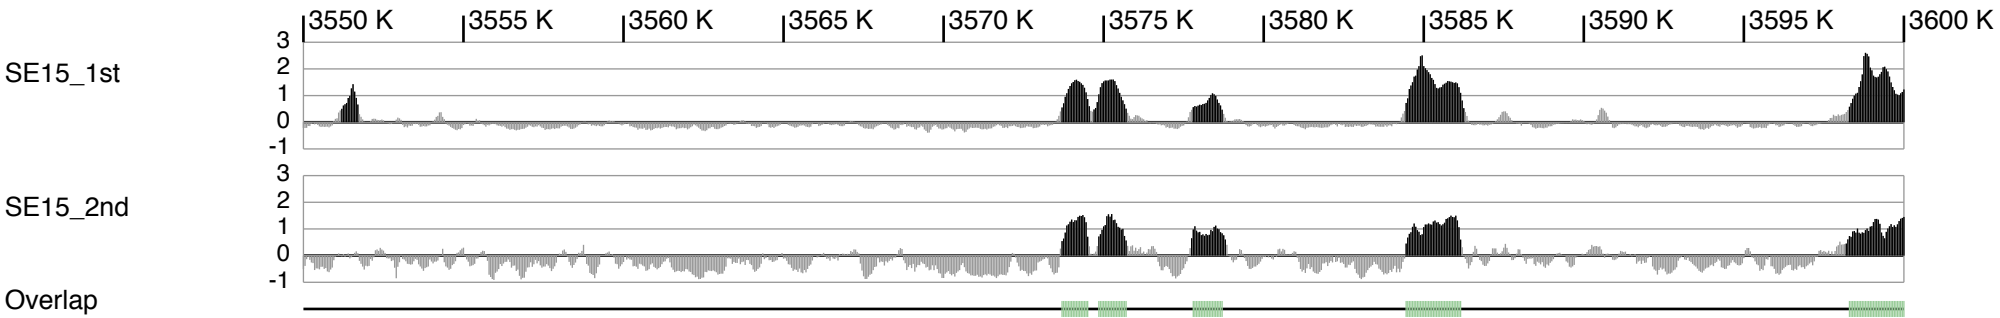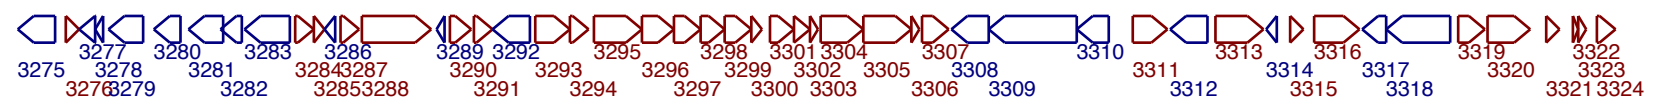

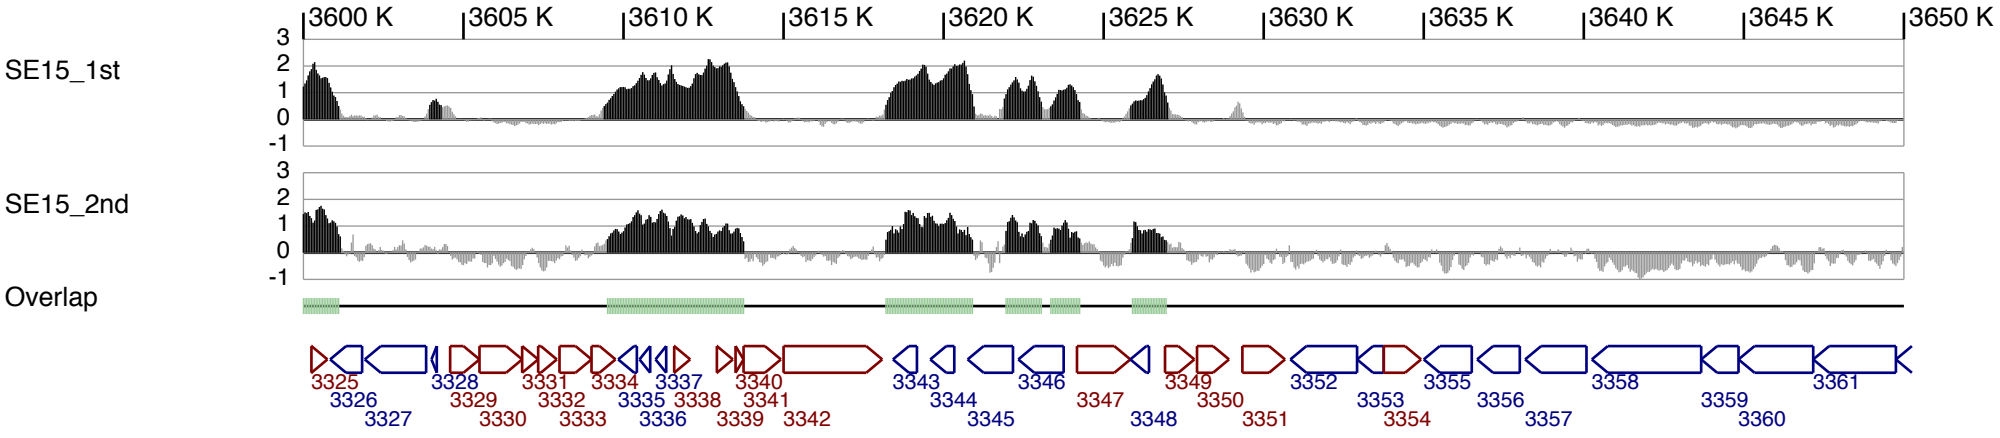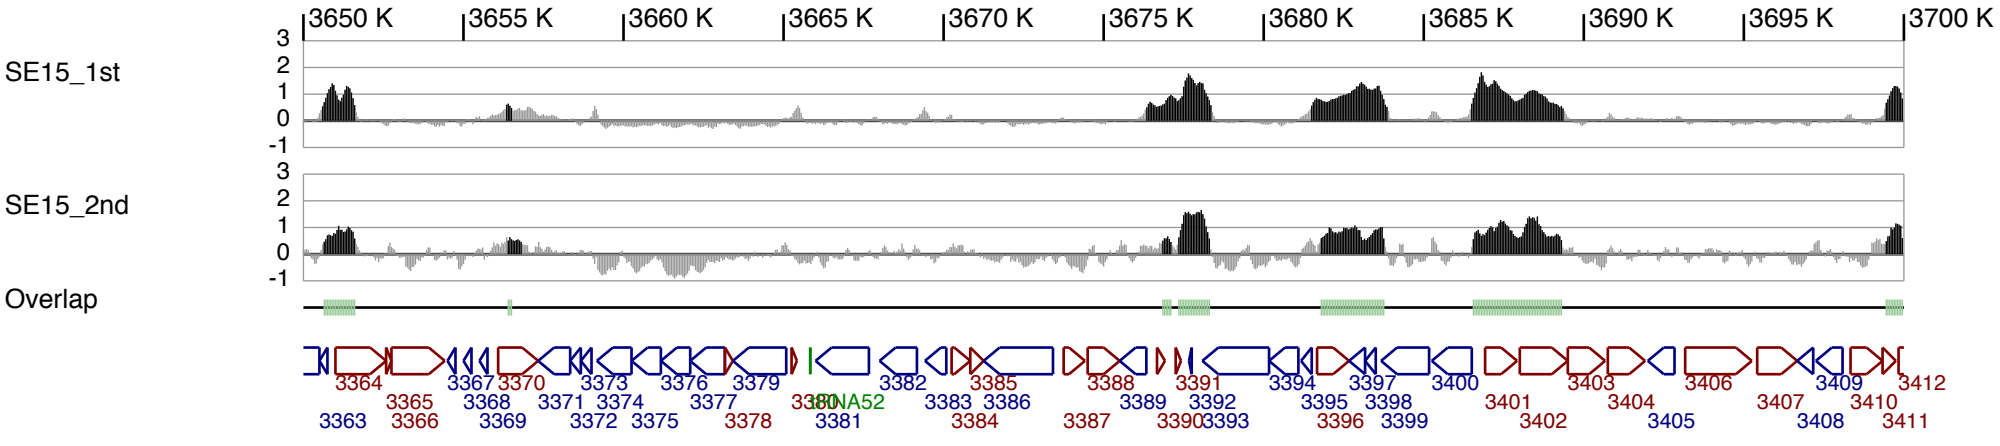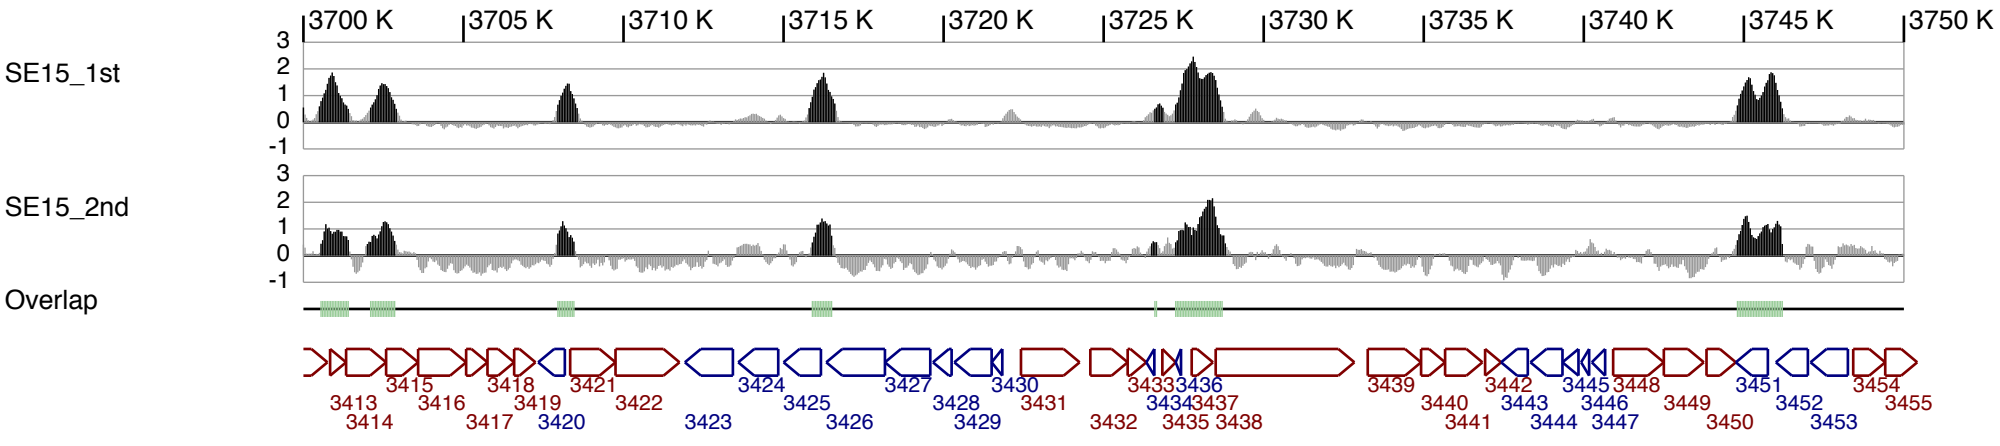

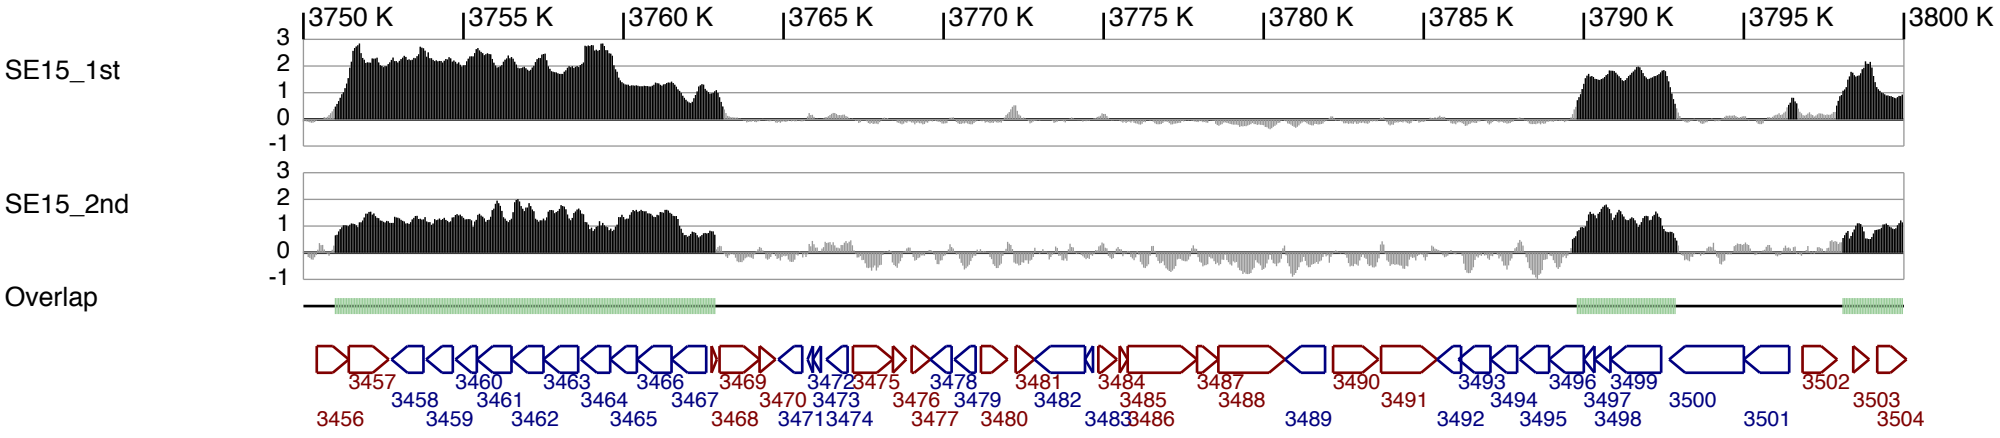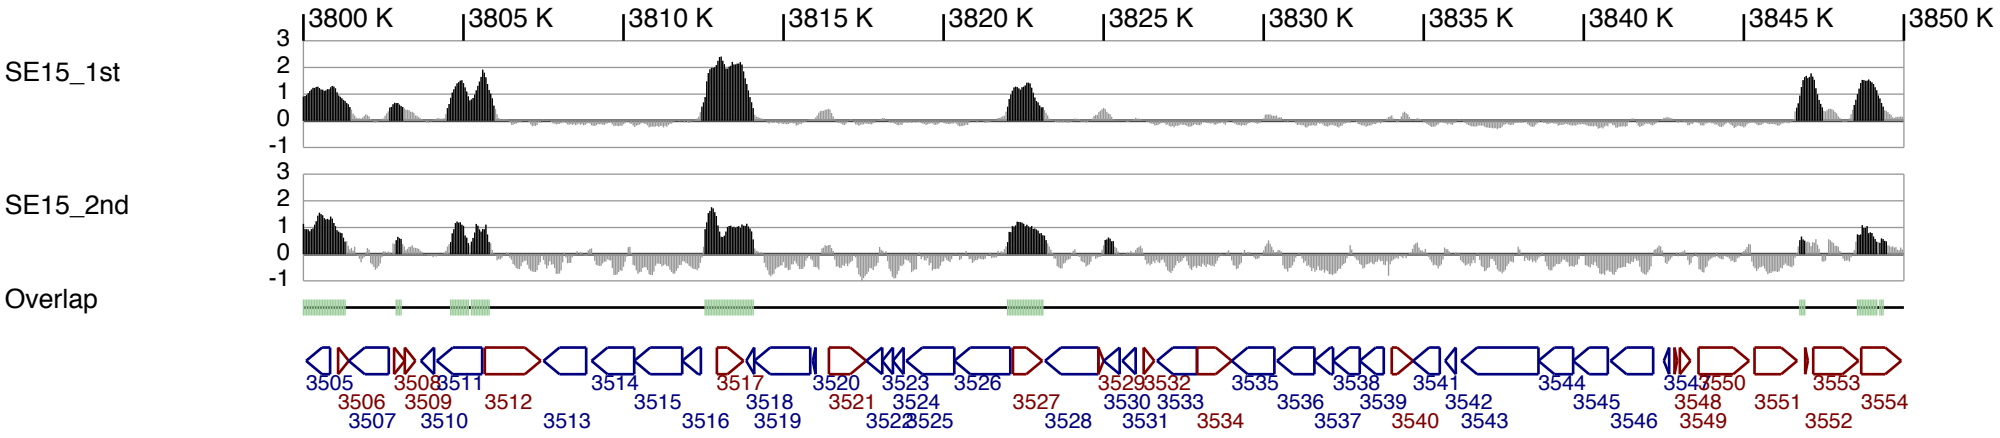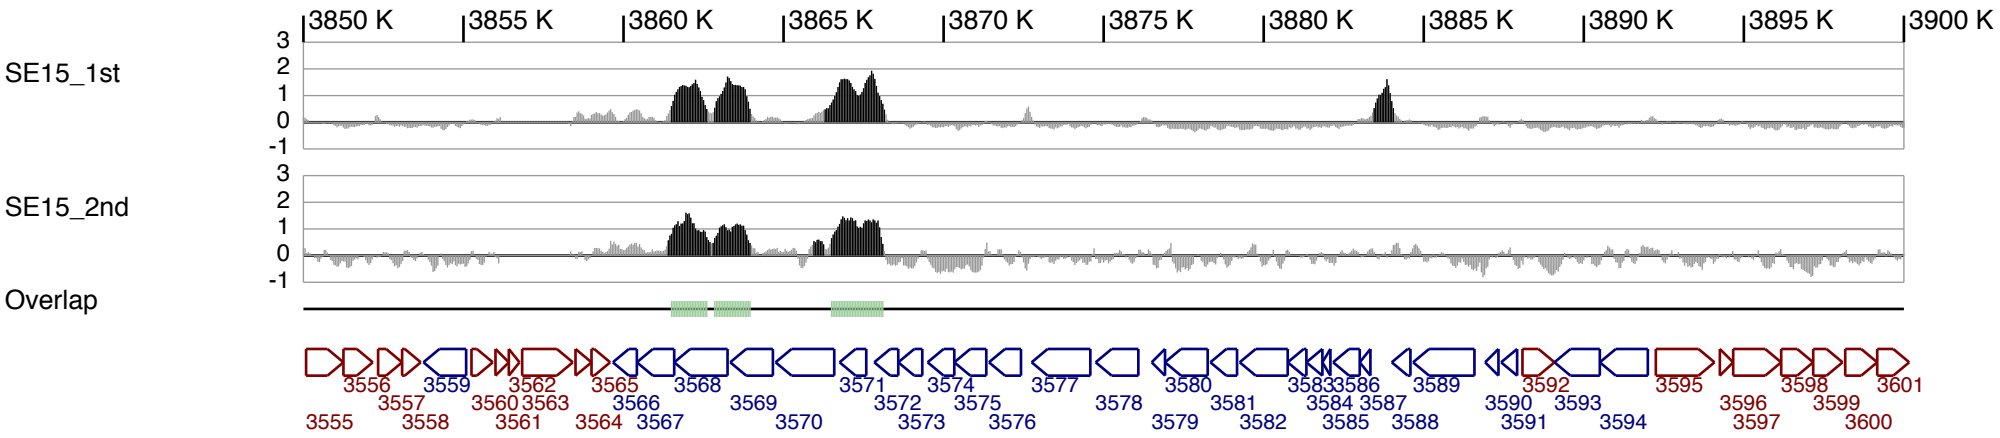

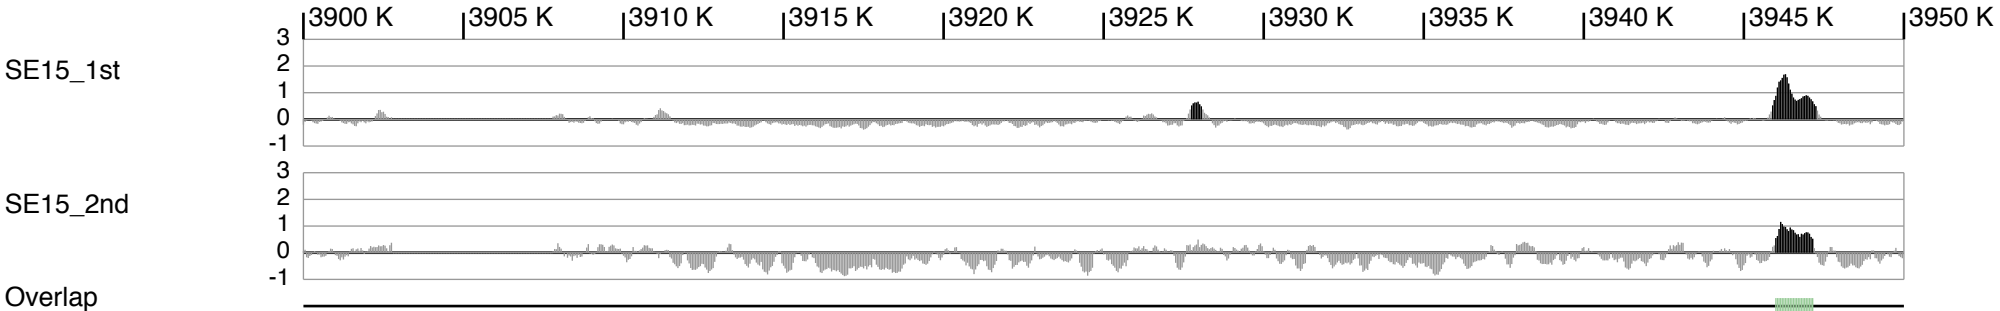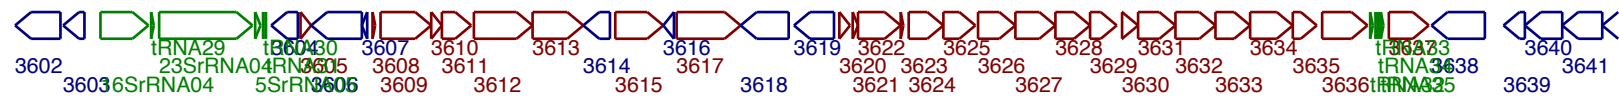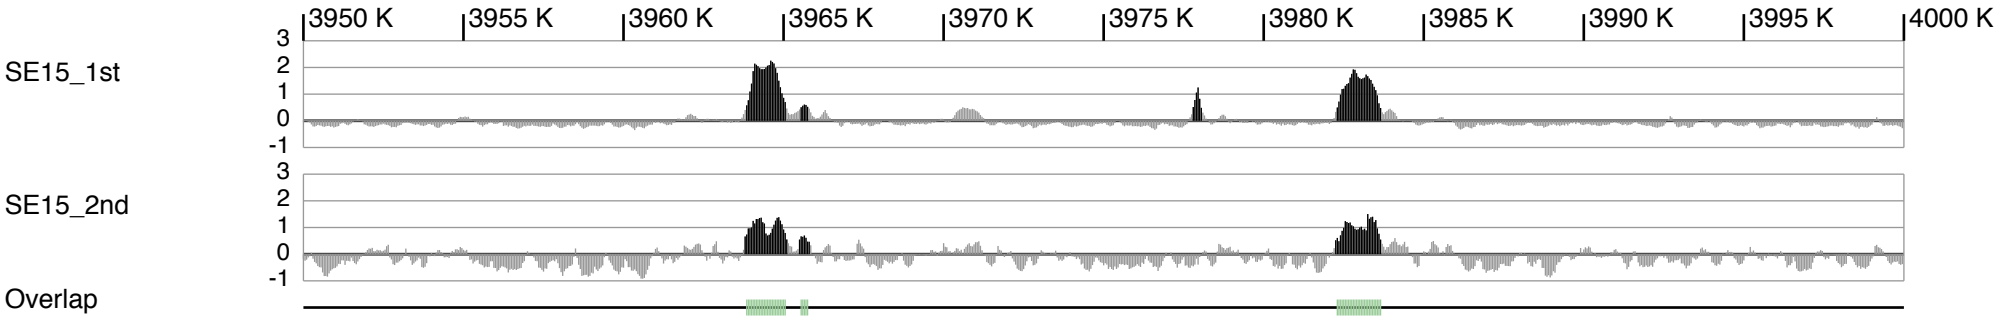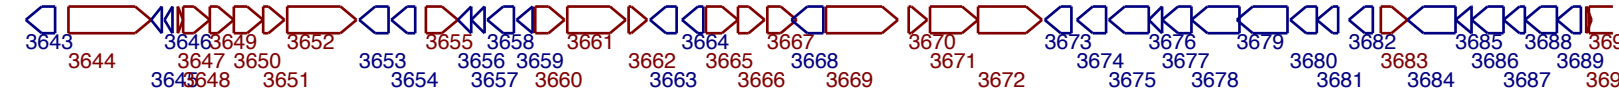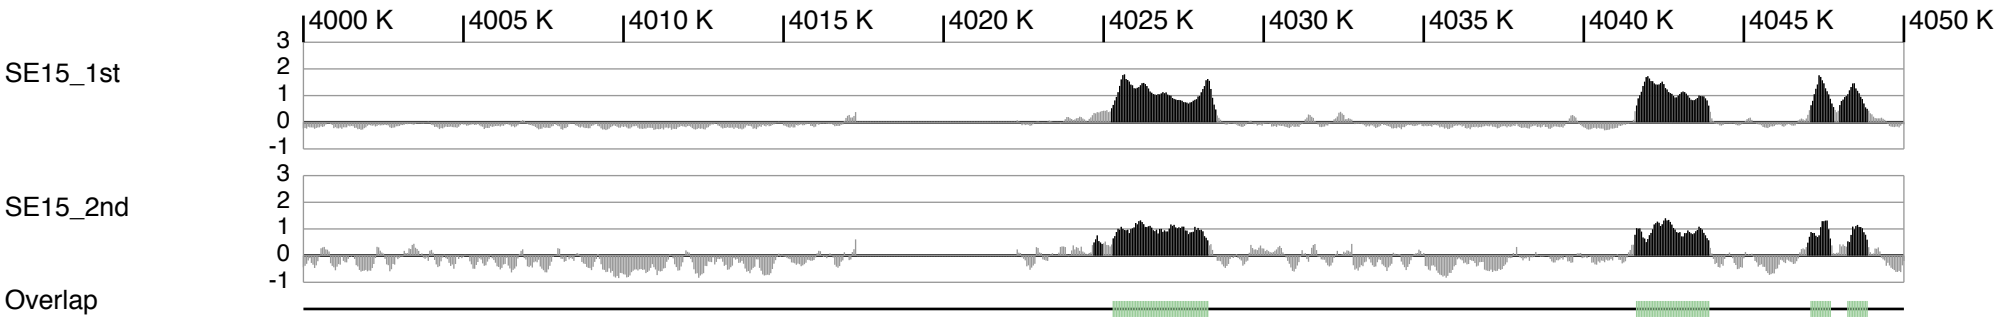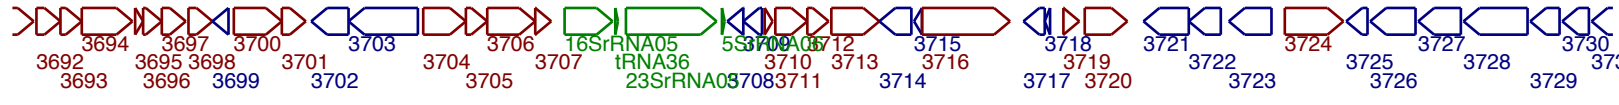



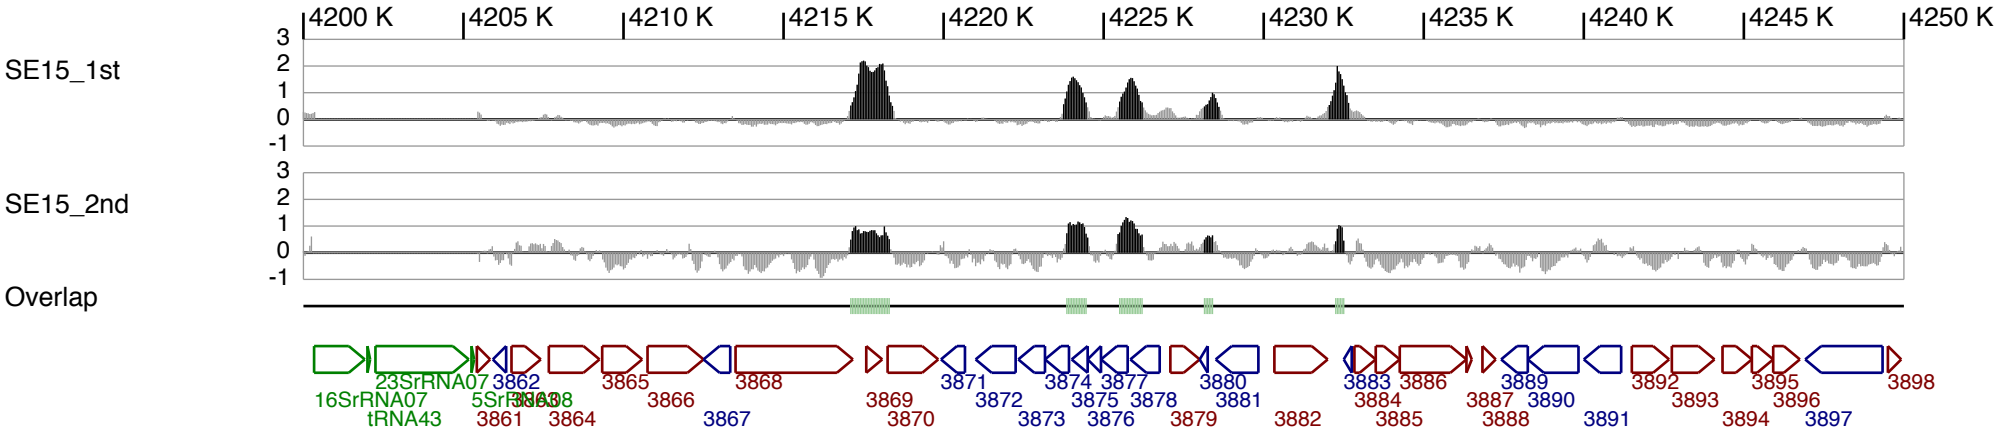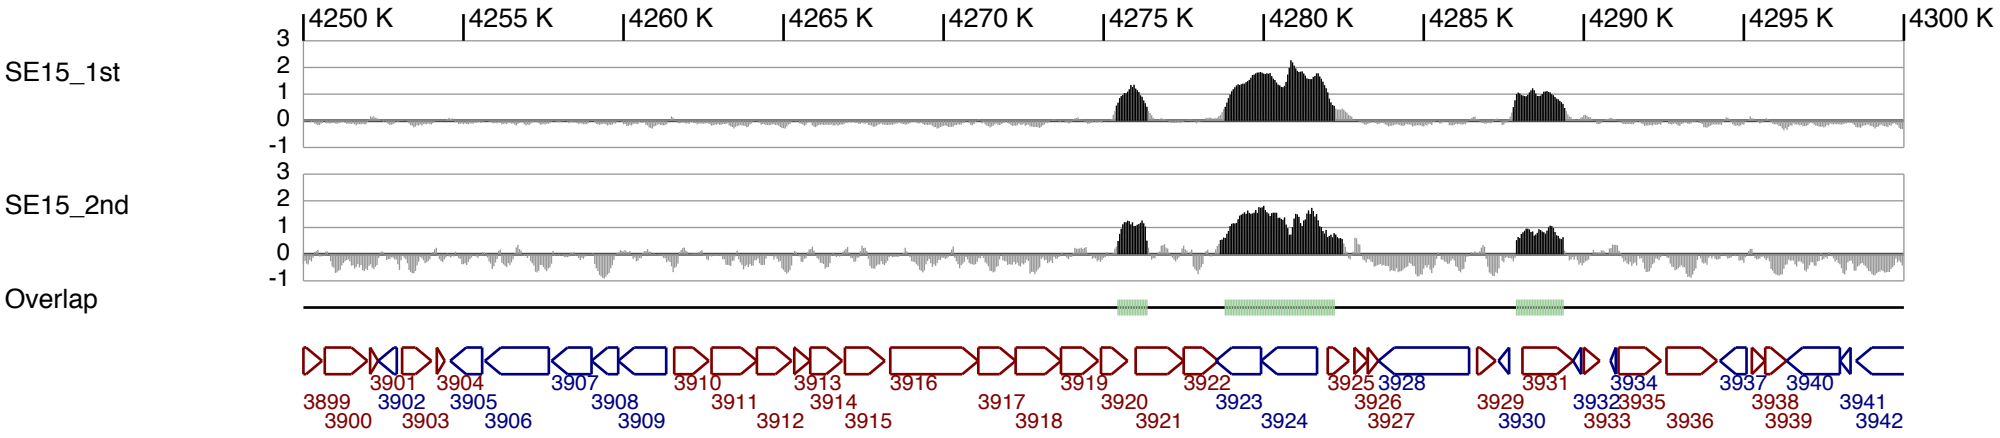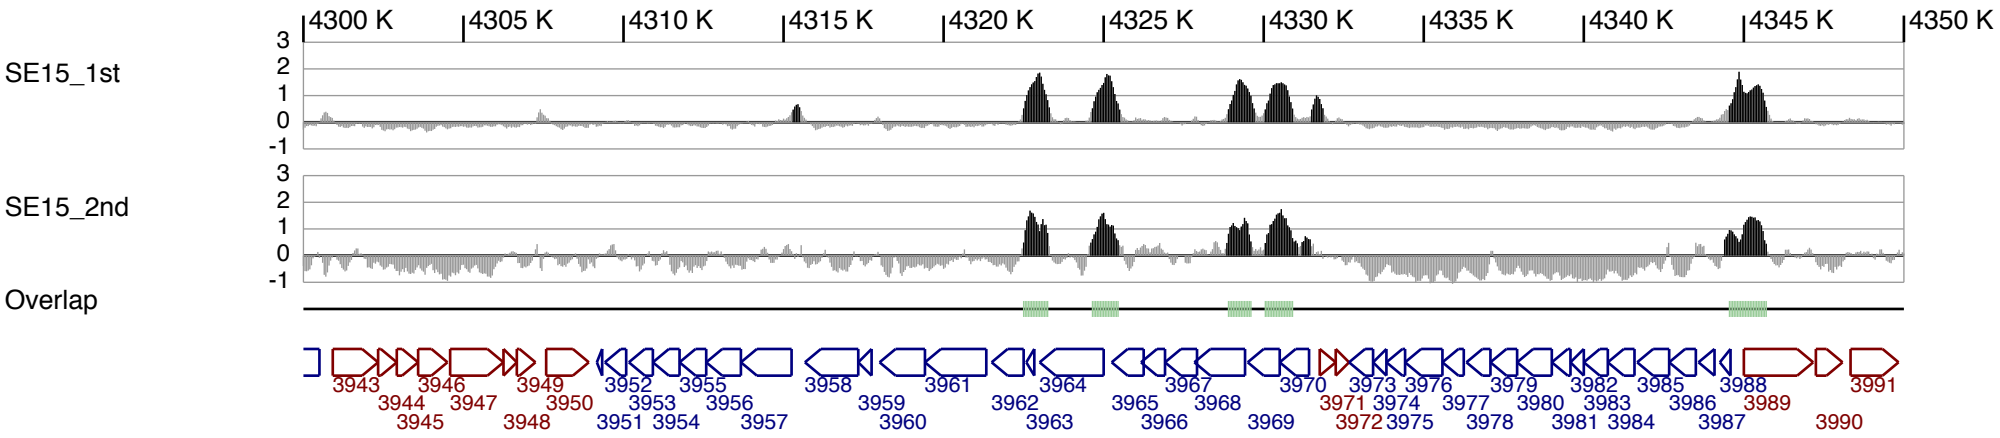



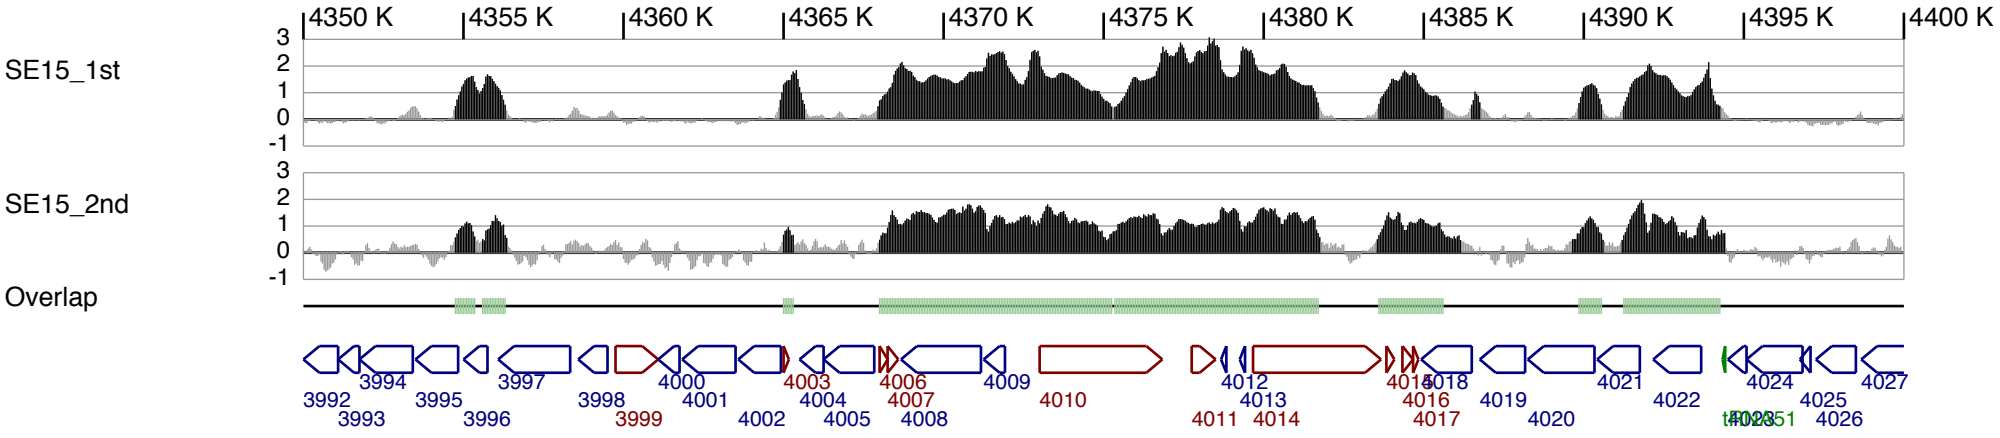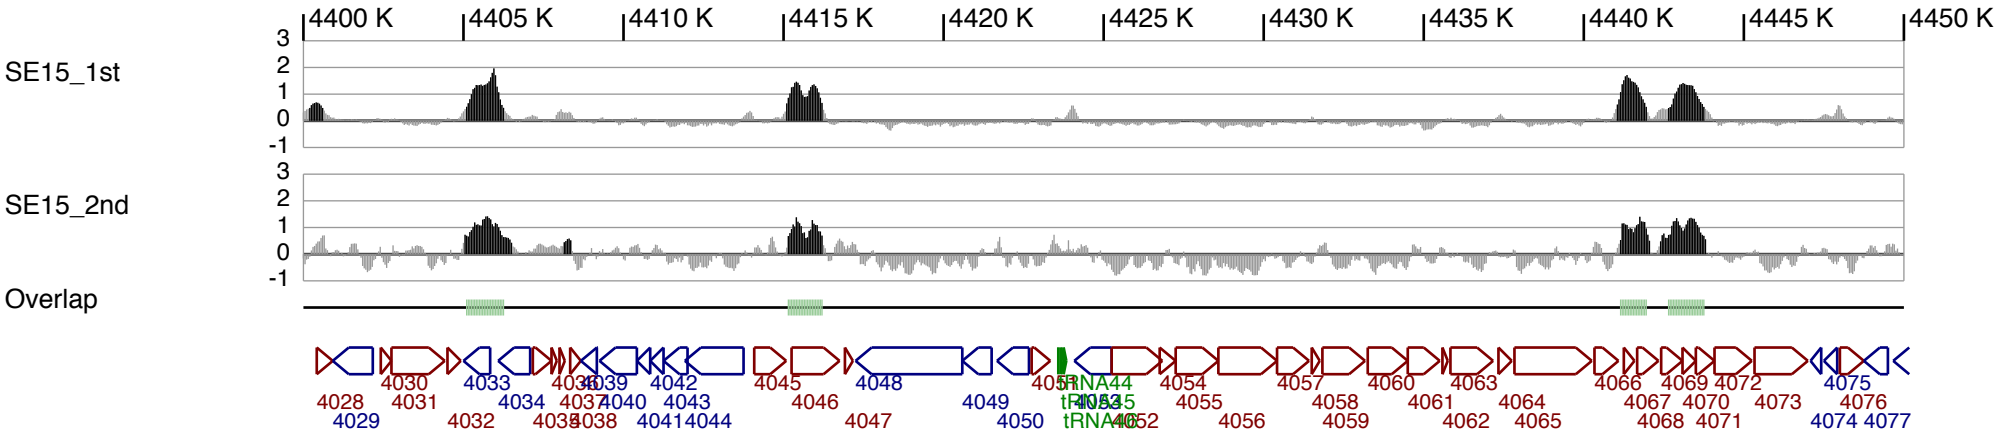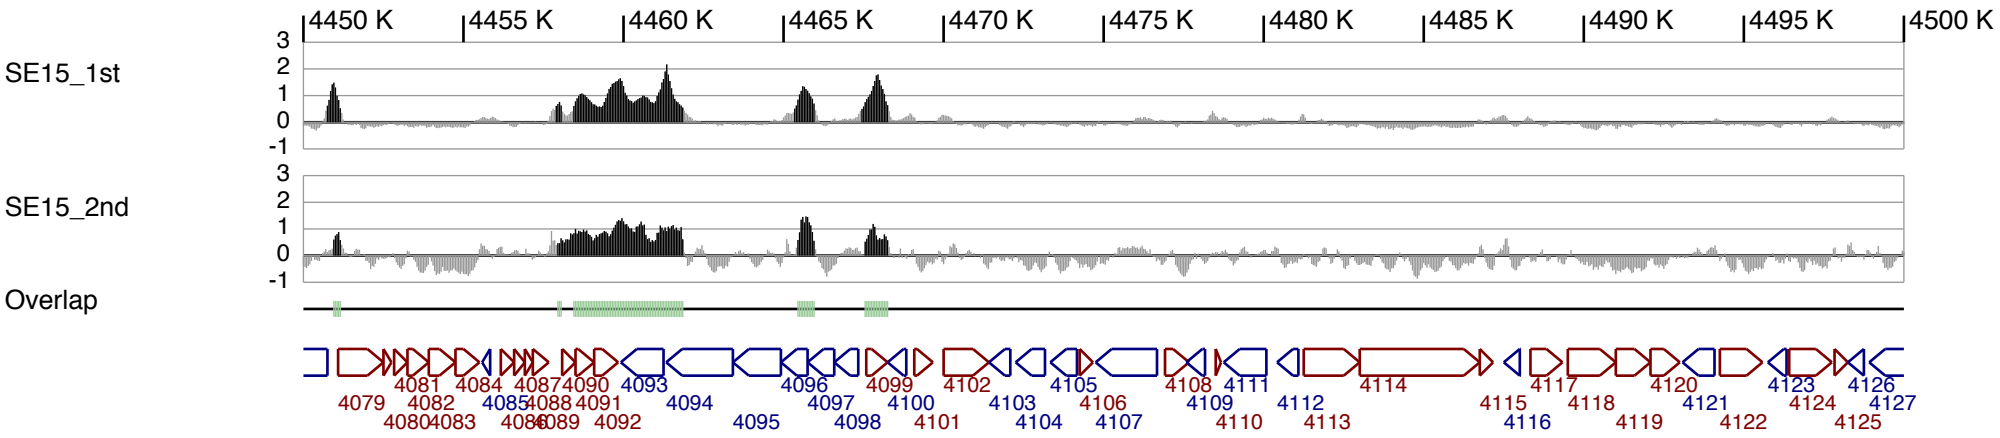

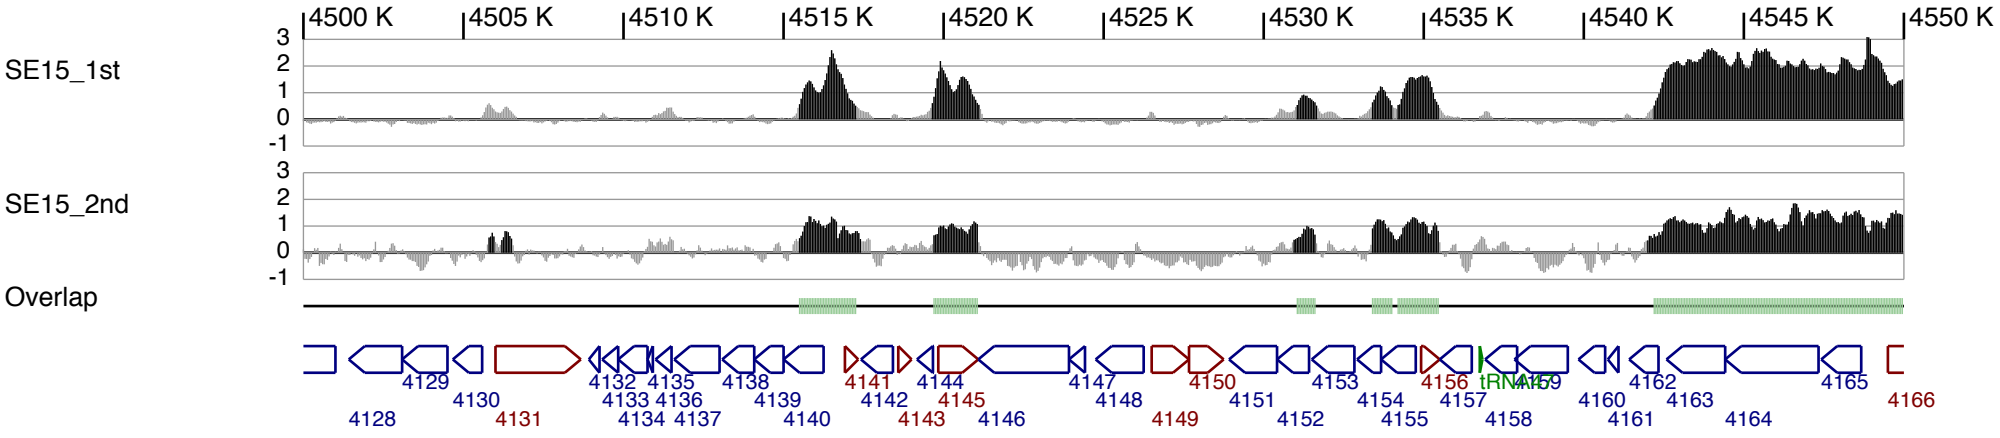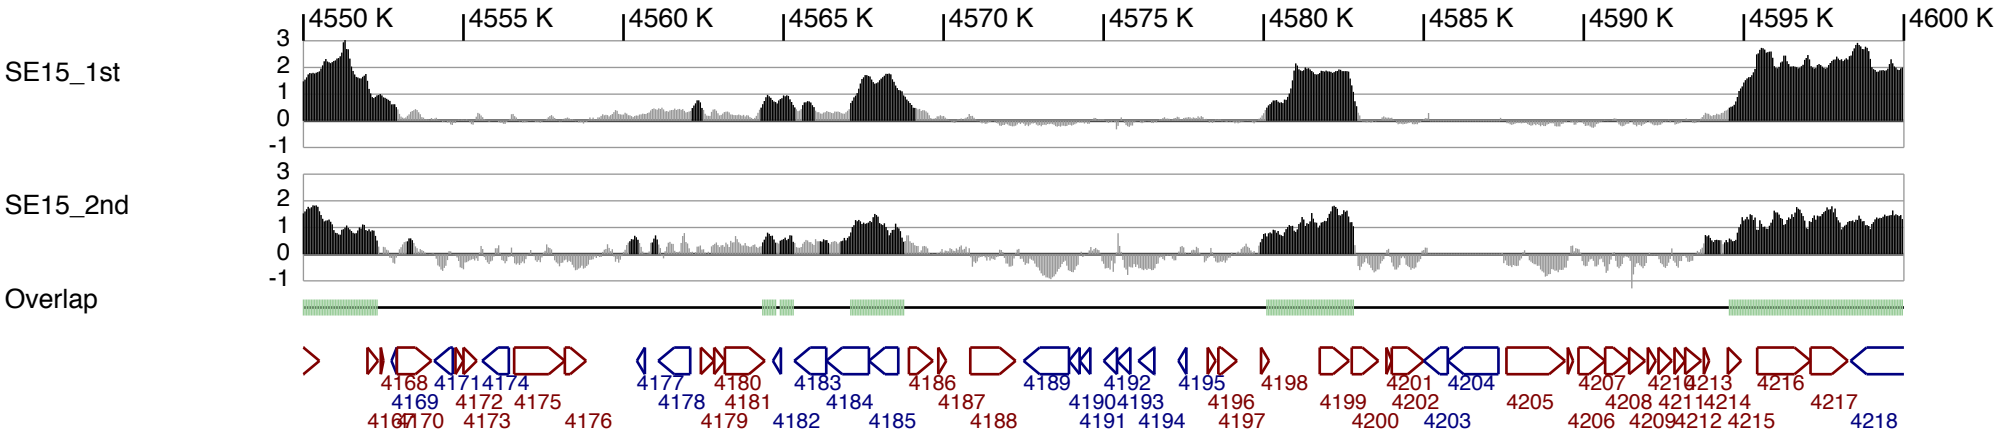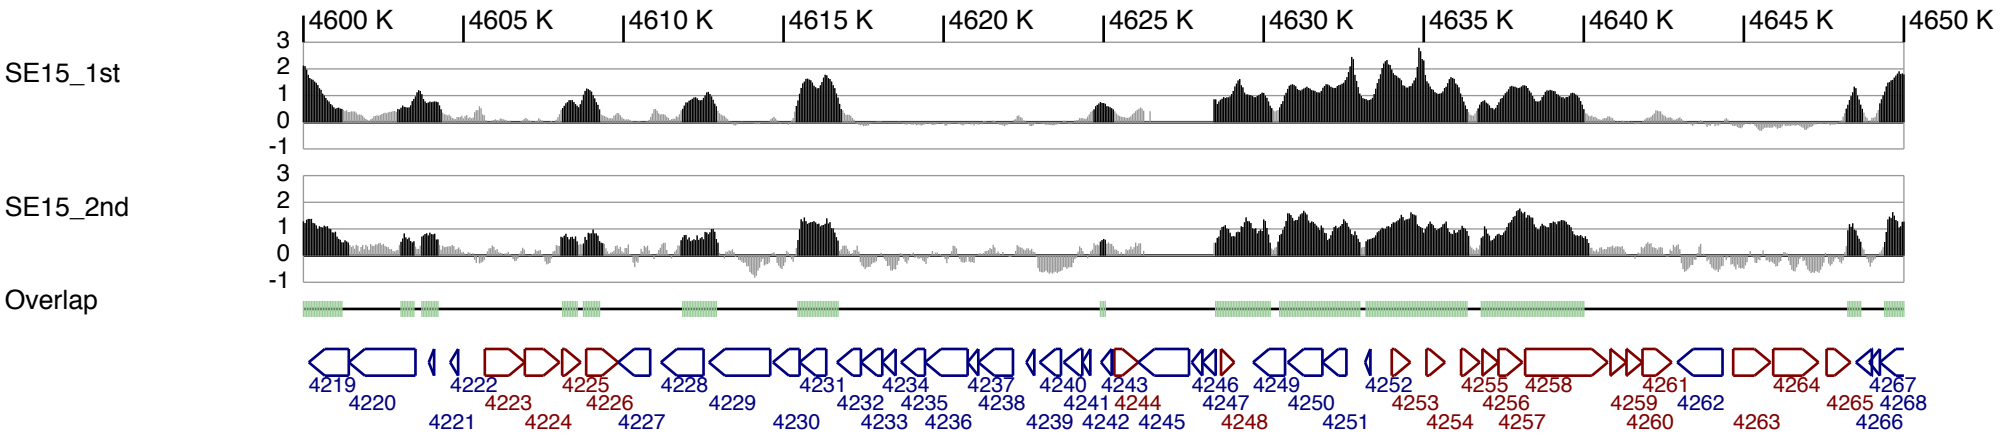

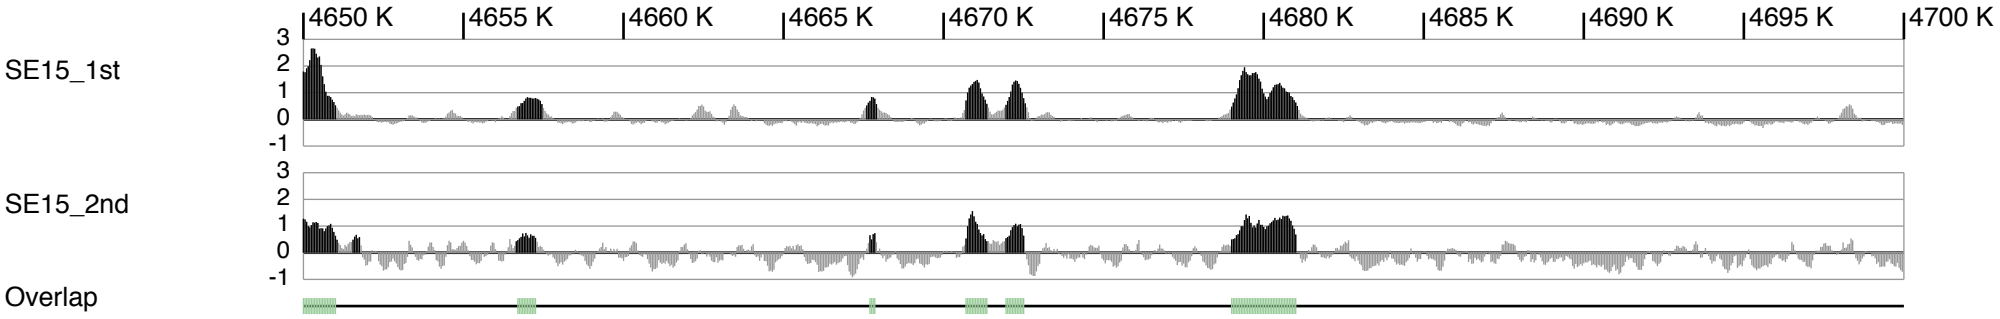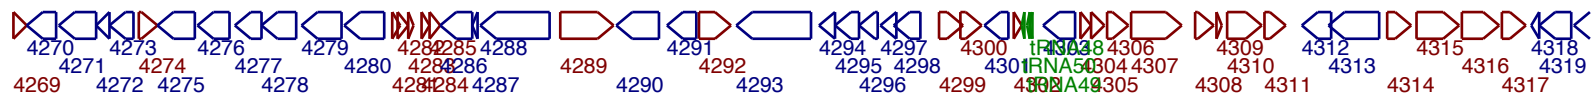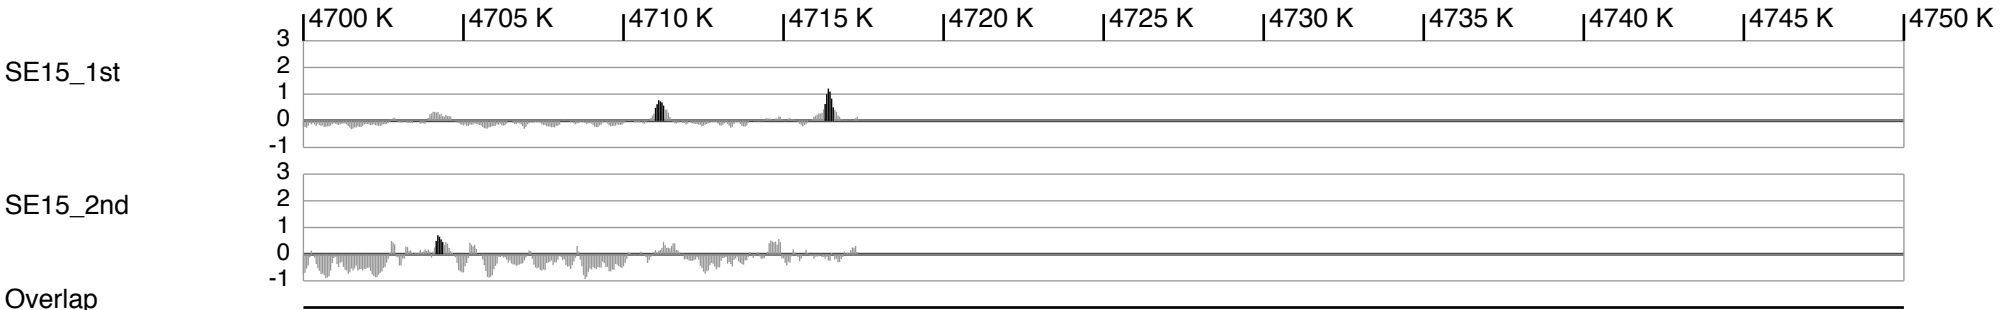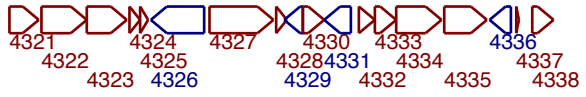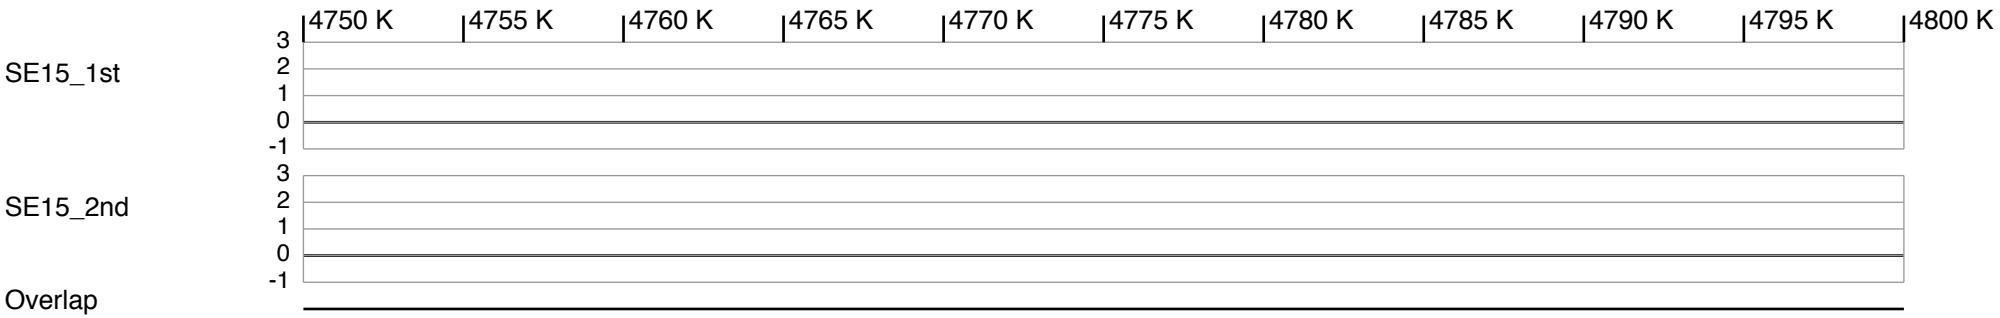

H-NS binding profiles in *Escherichia coli* K-12 (W3110)  
(1st experiment and 2nd experiment)

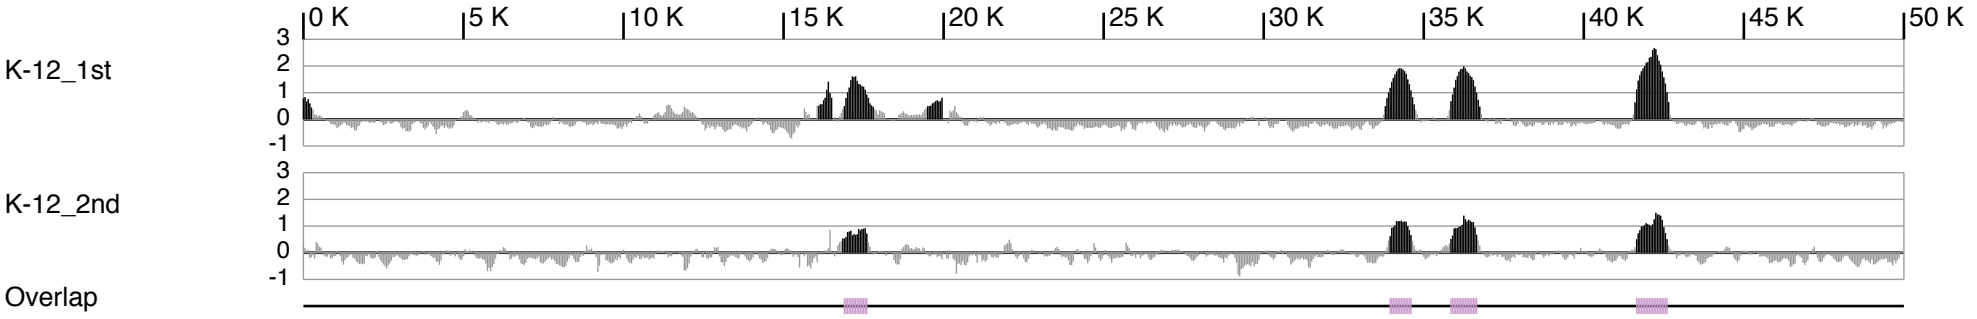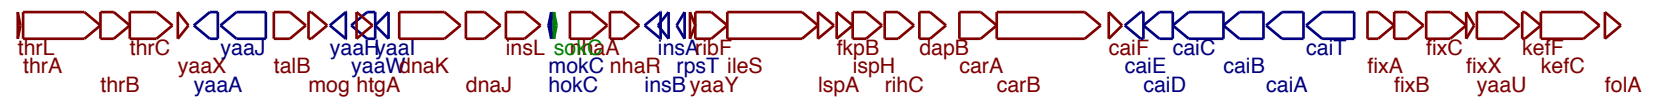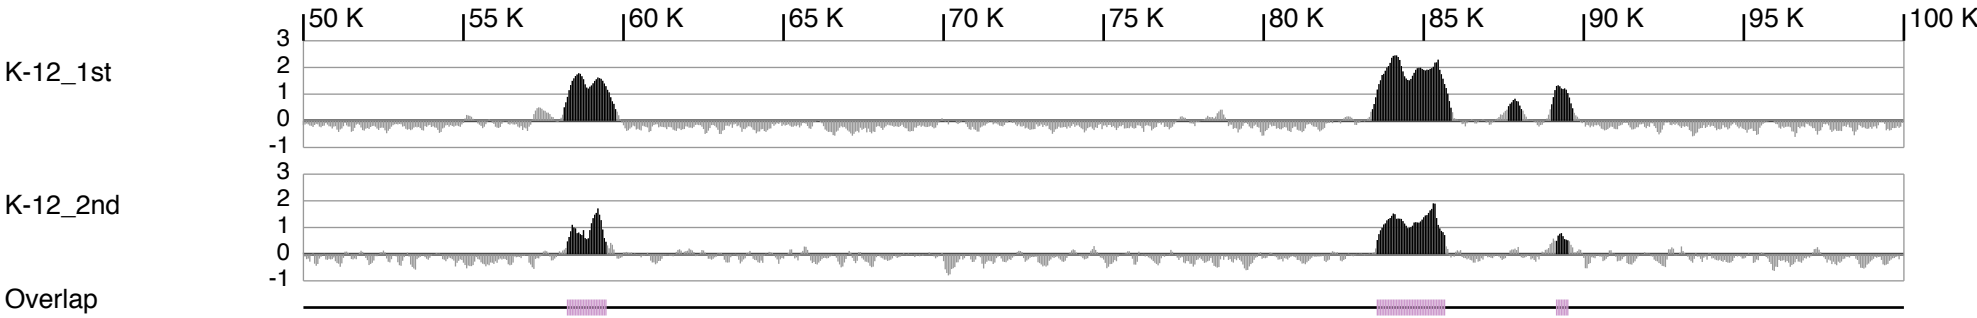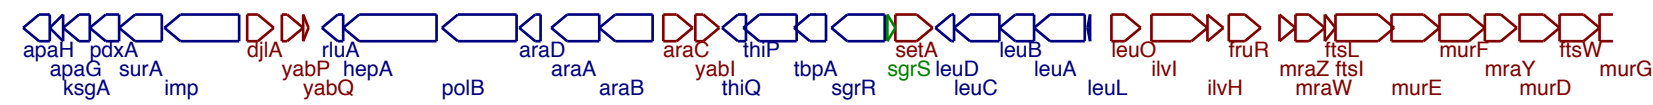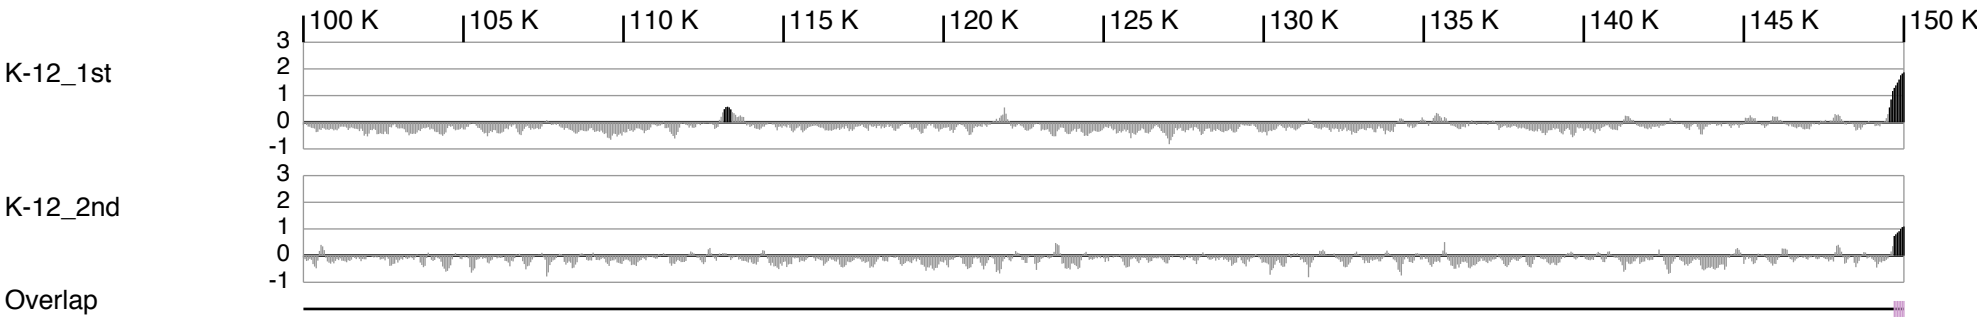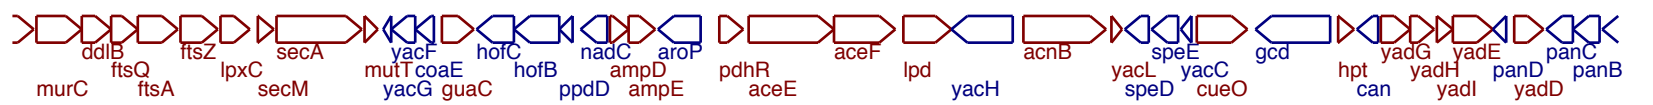

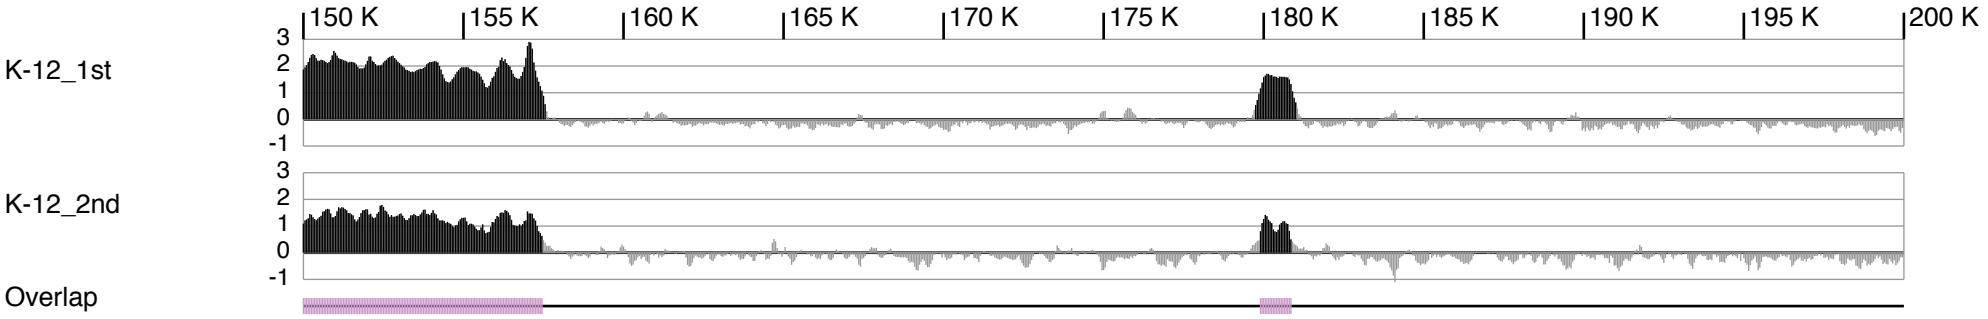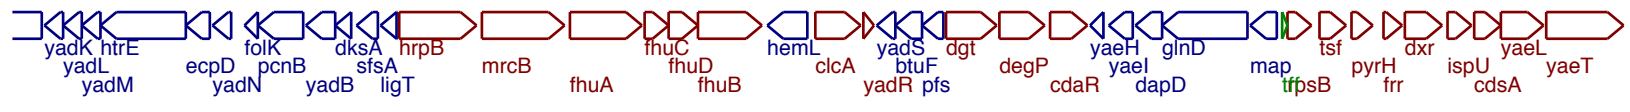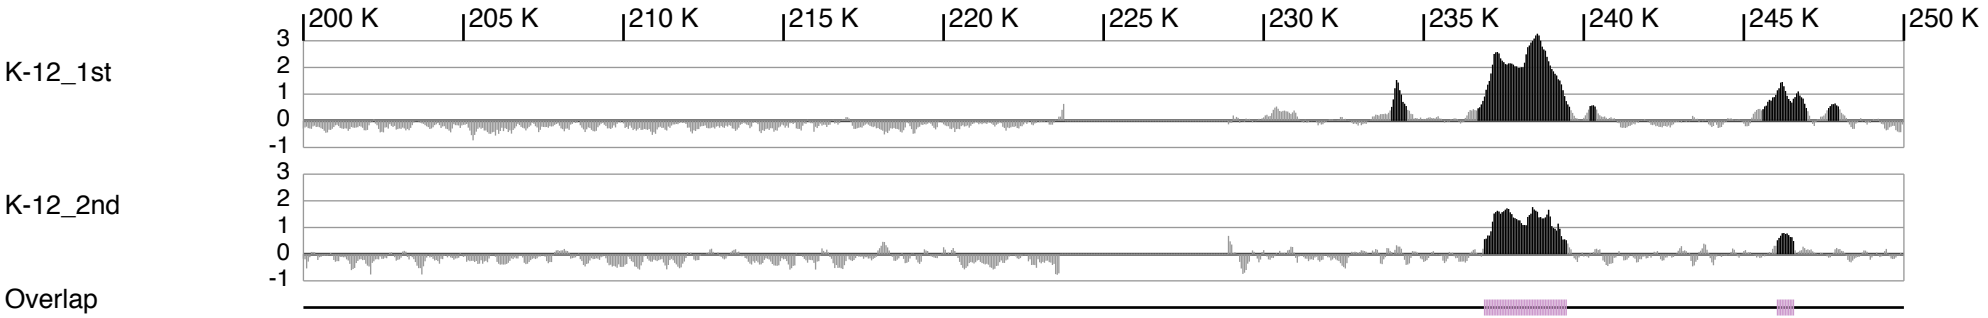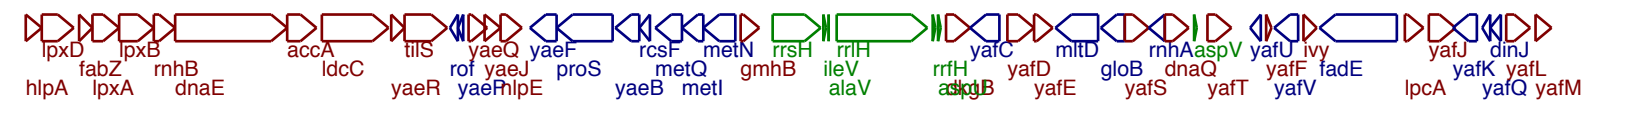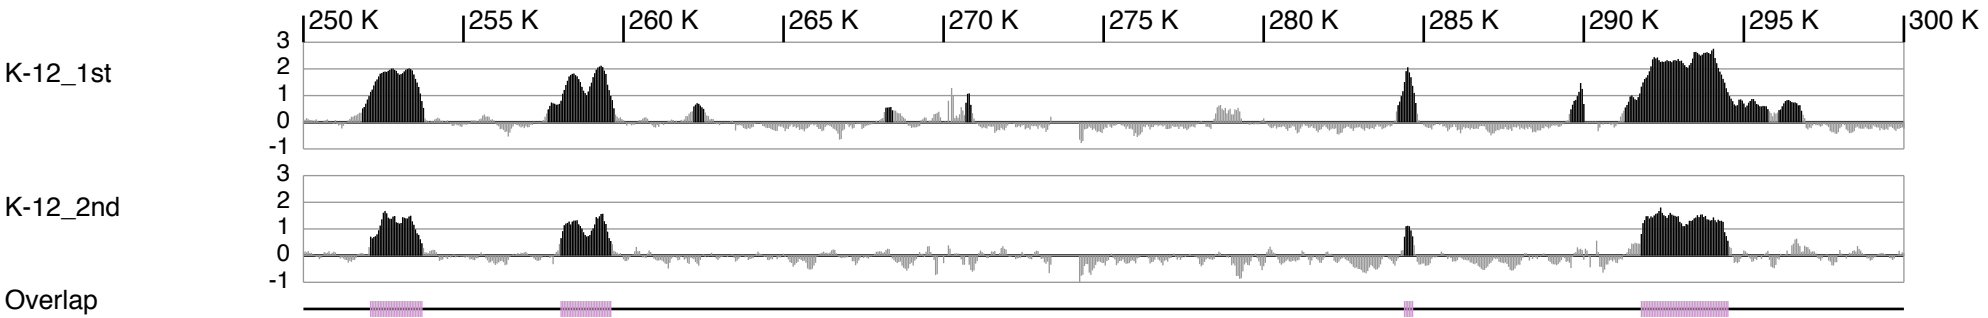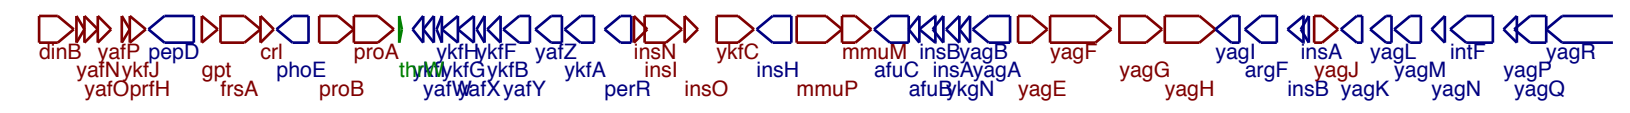







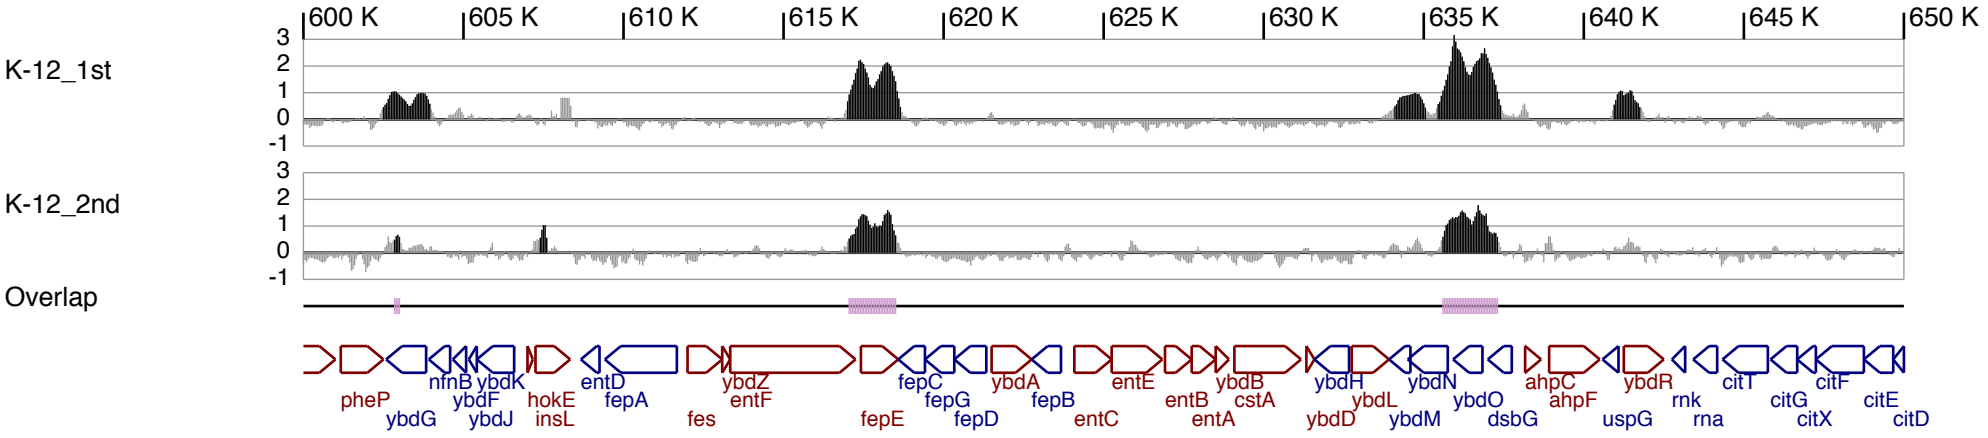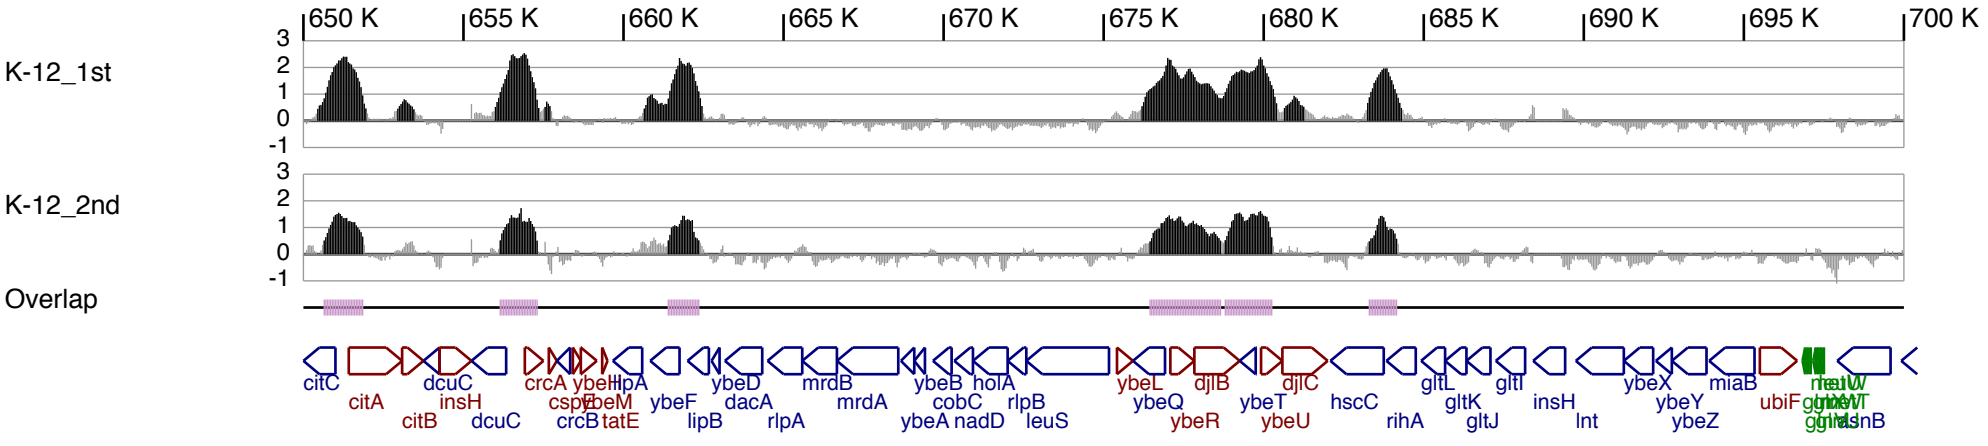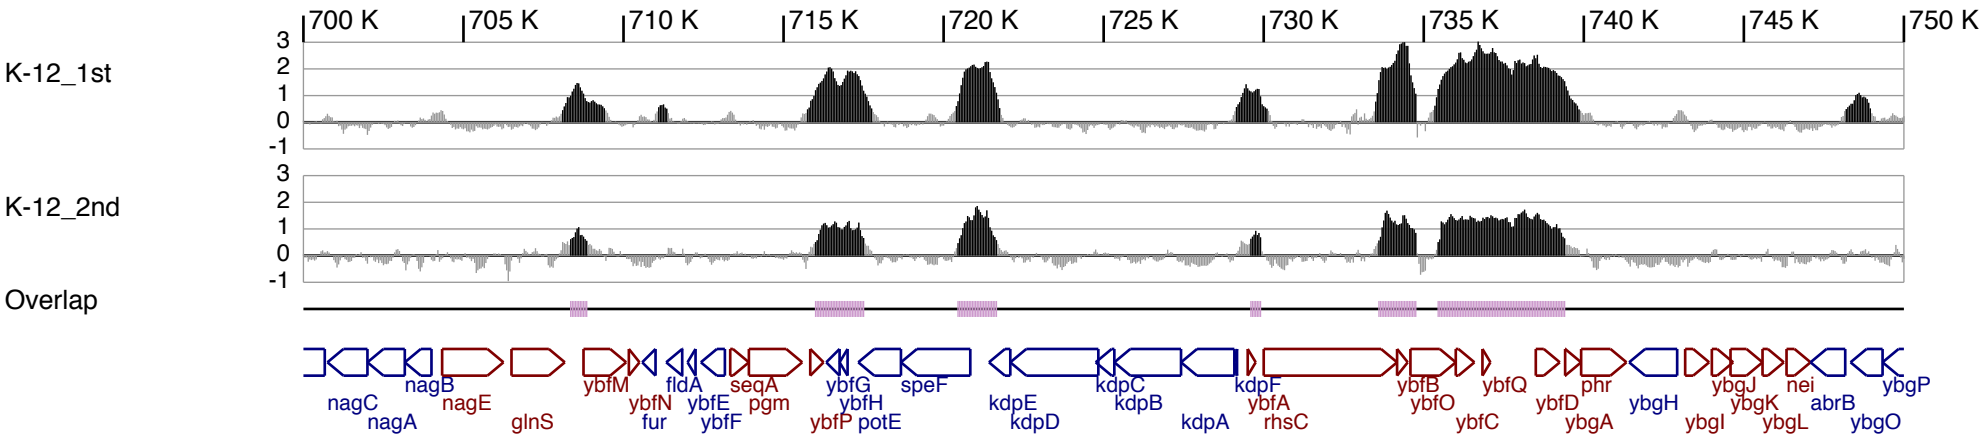







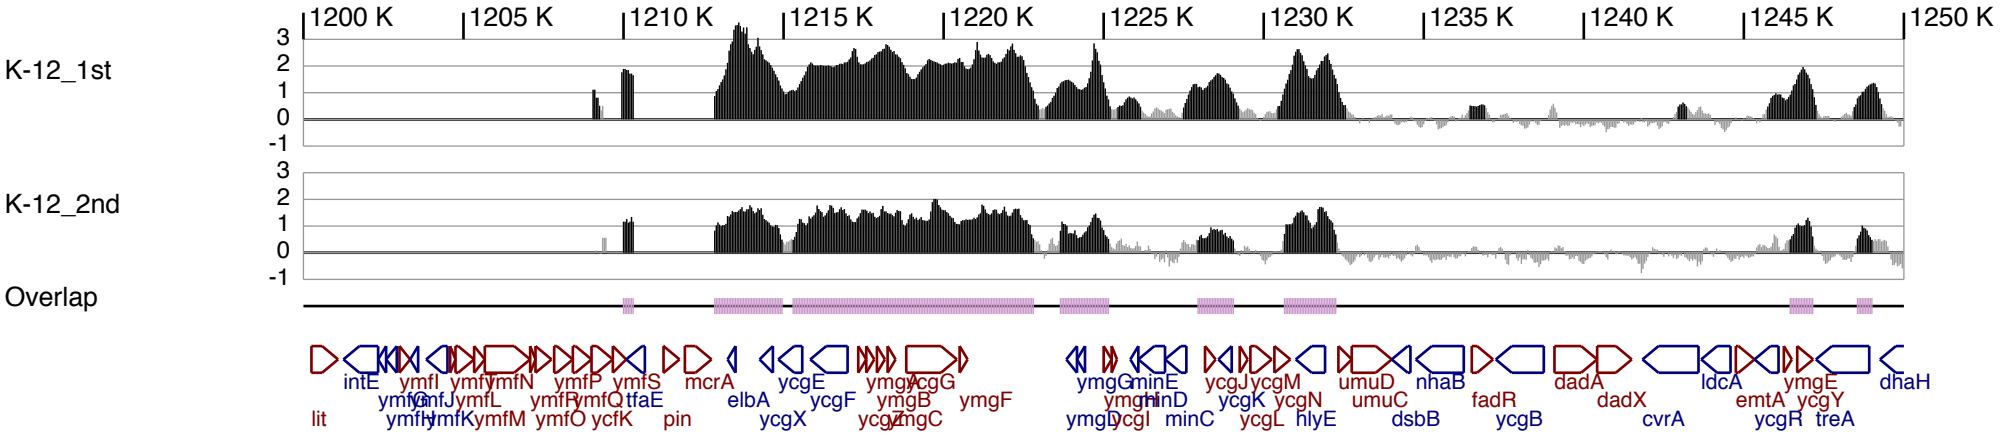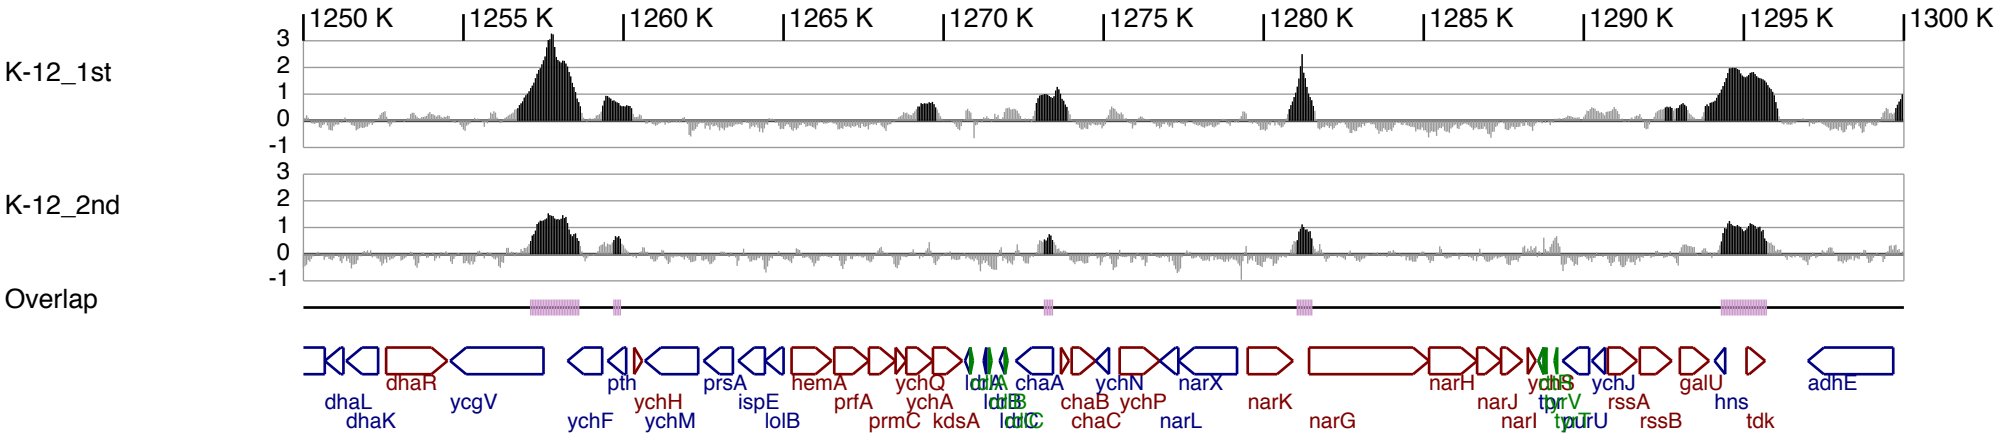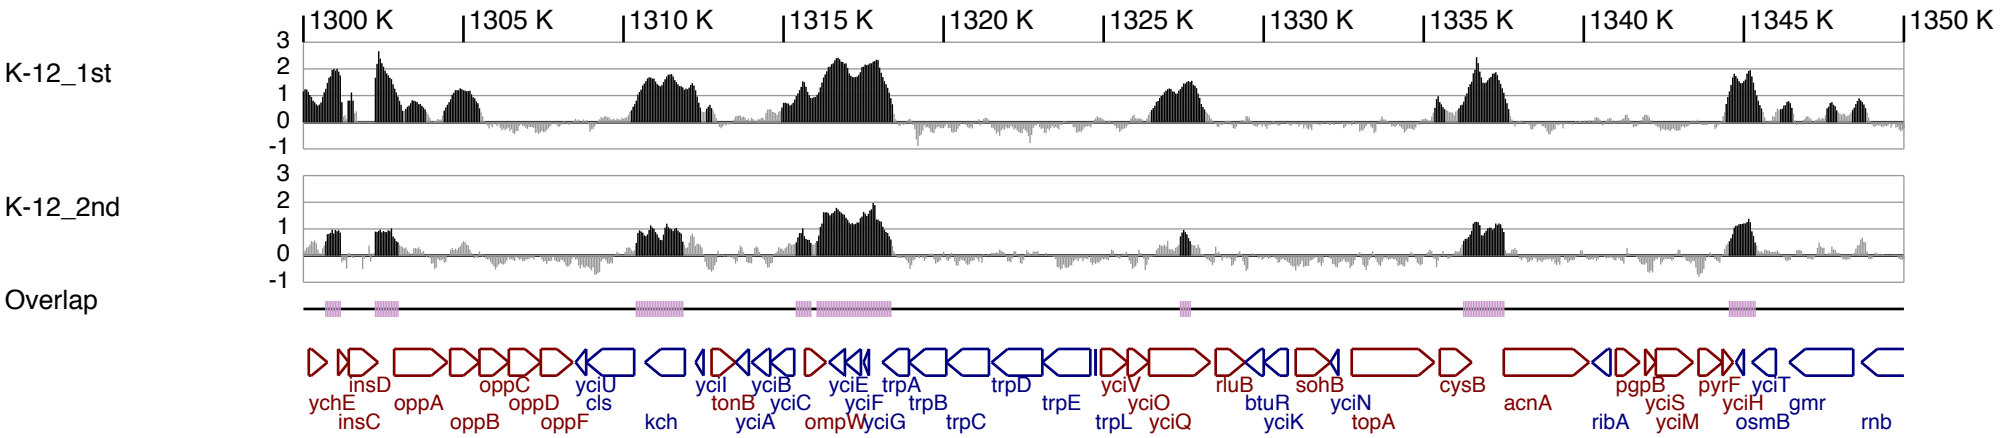

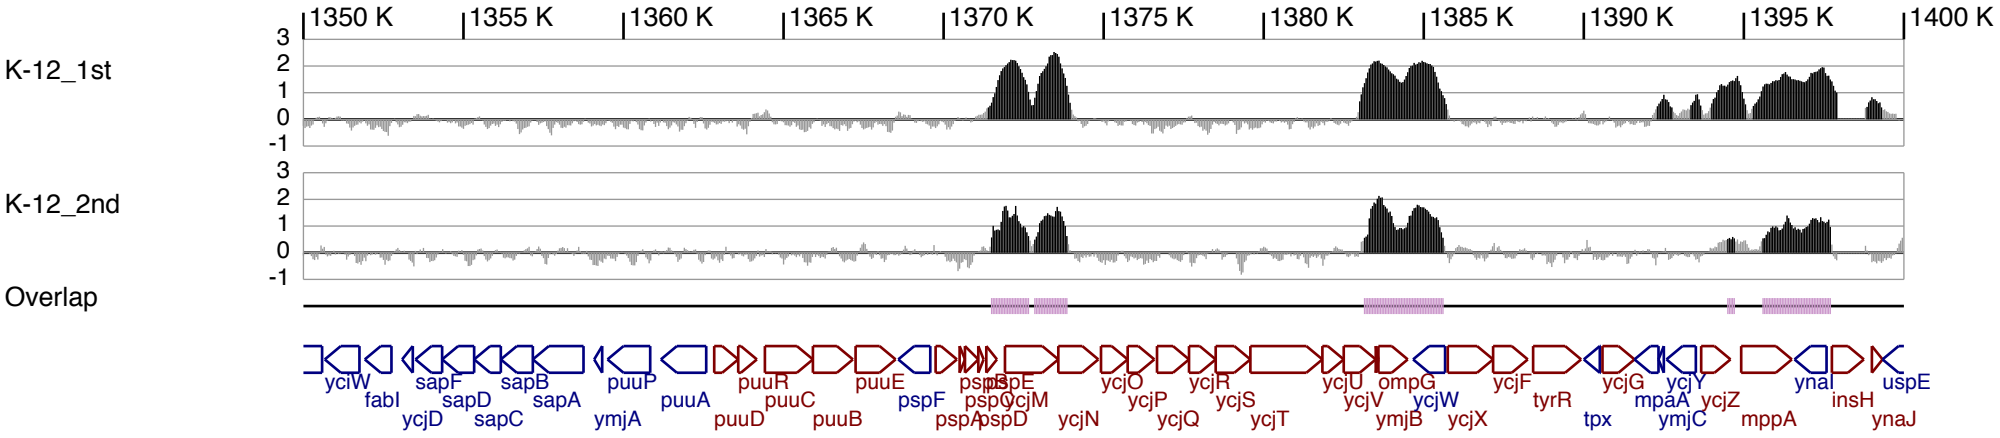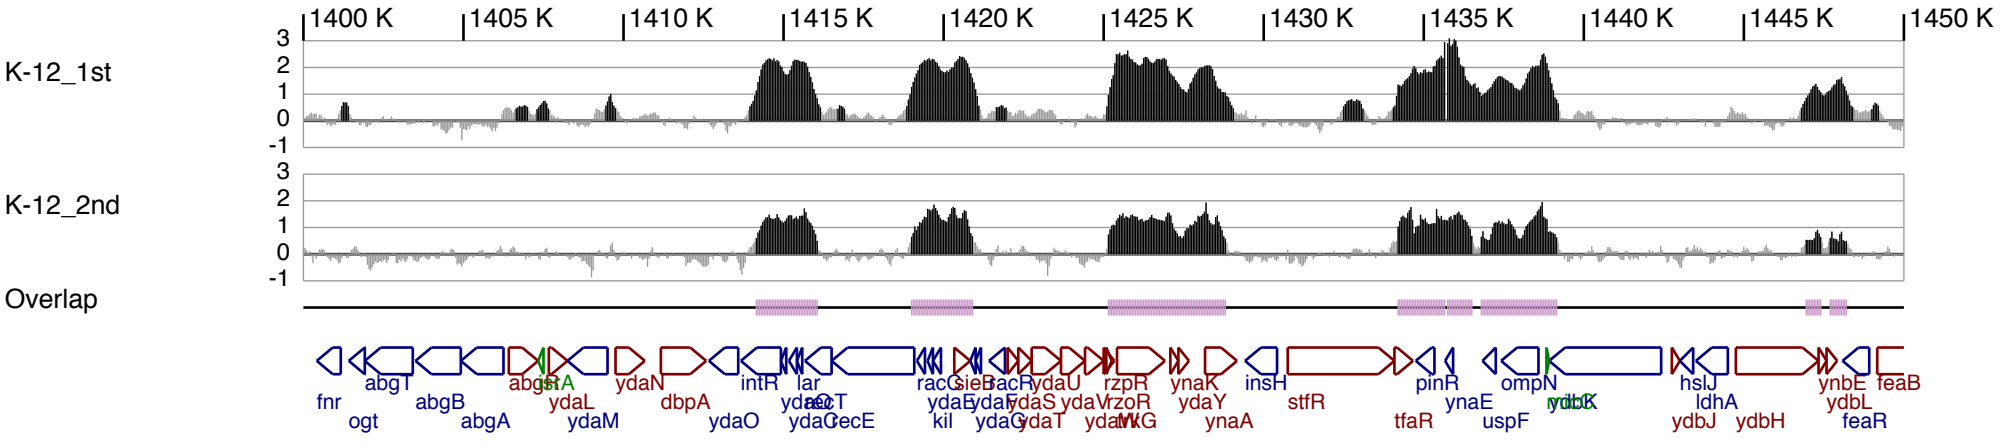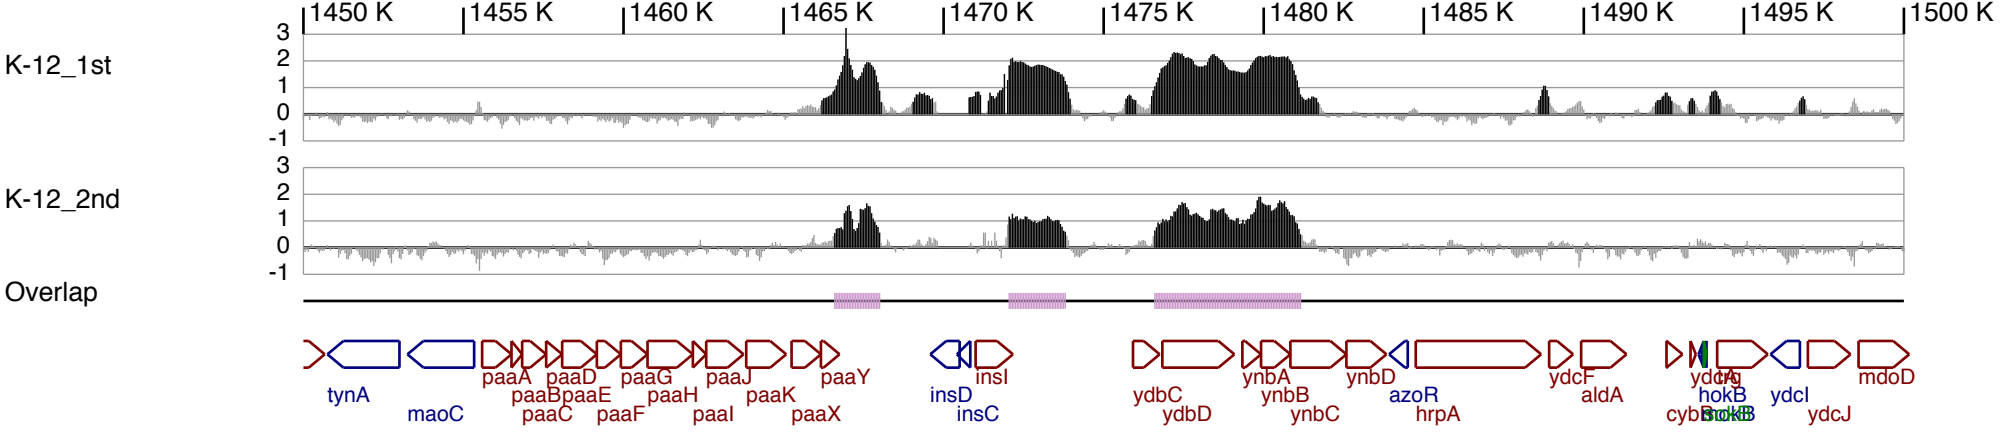

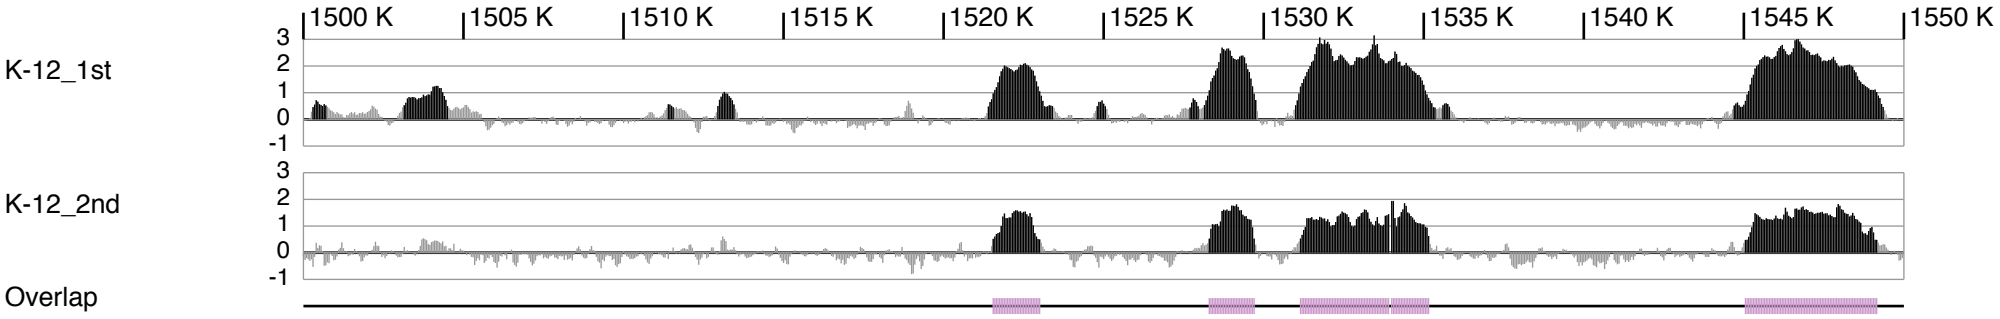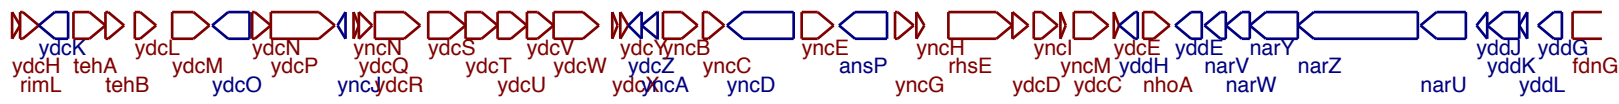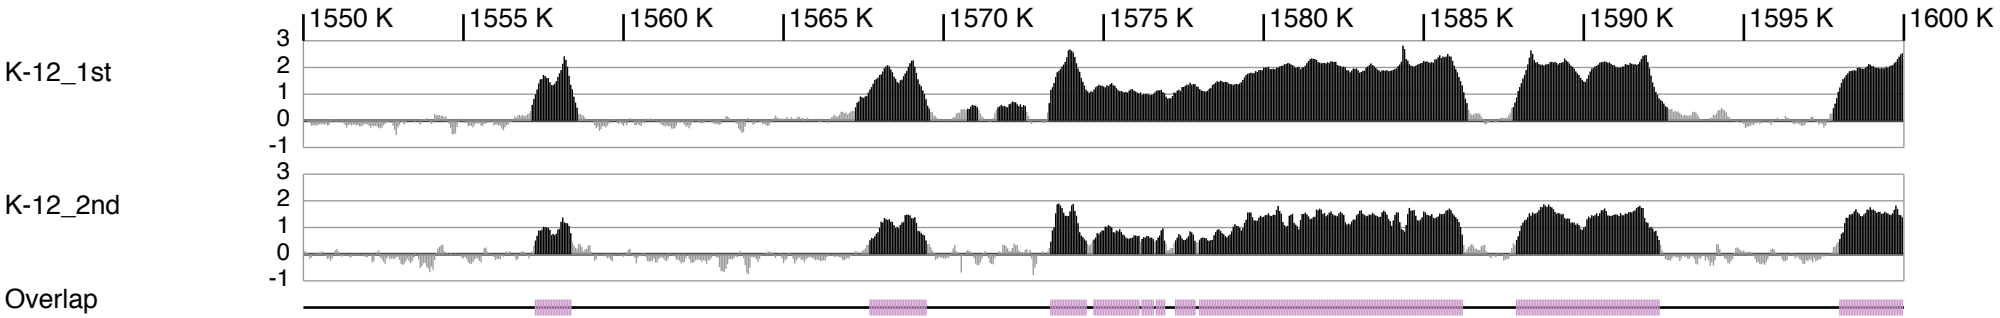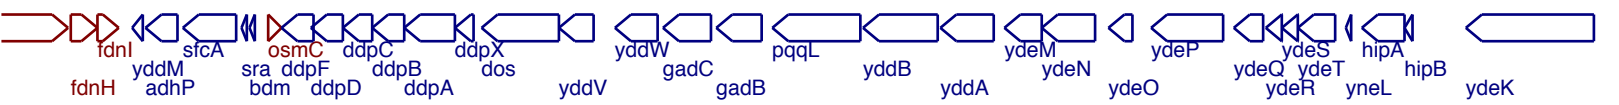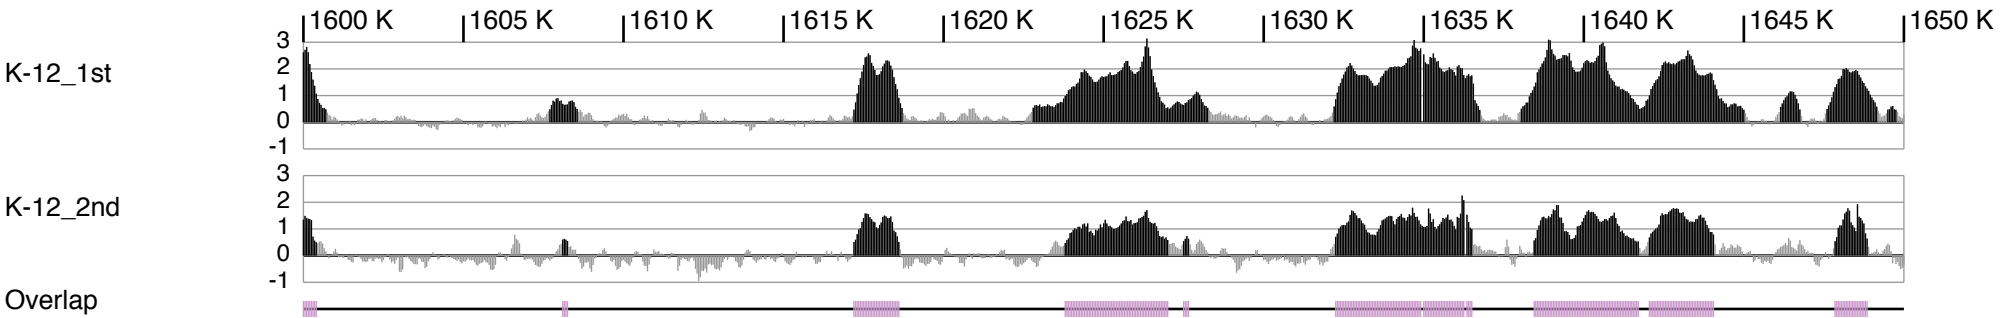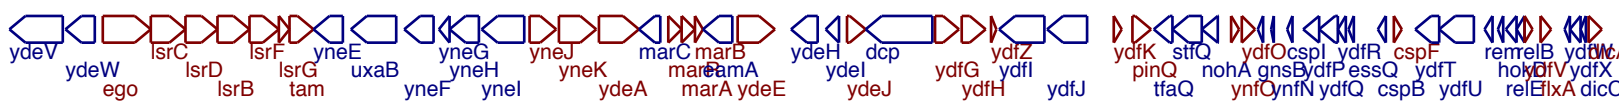

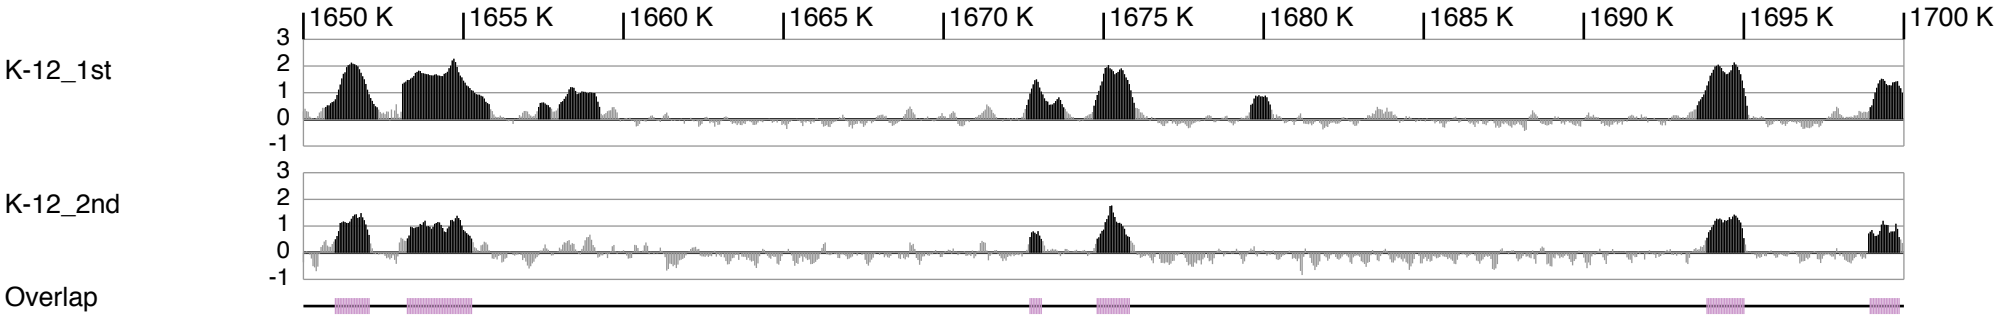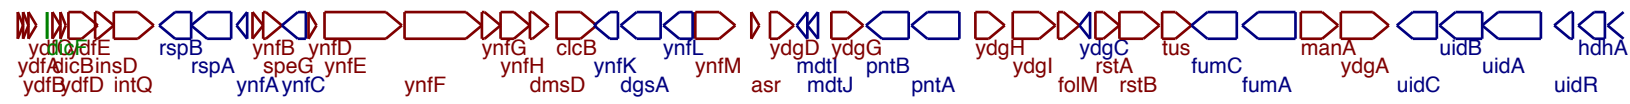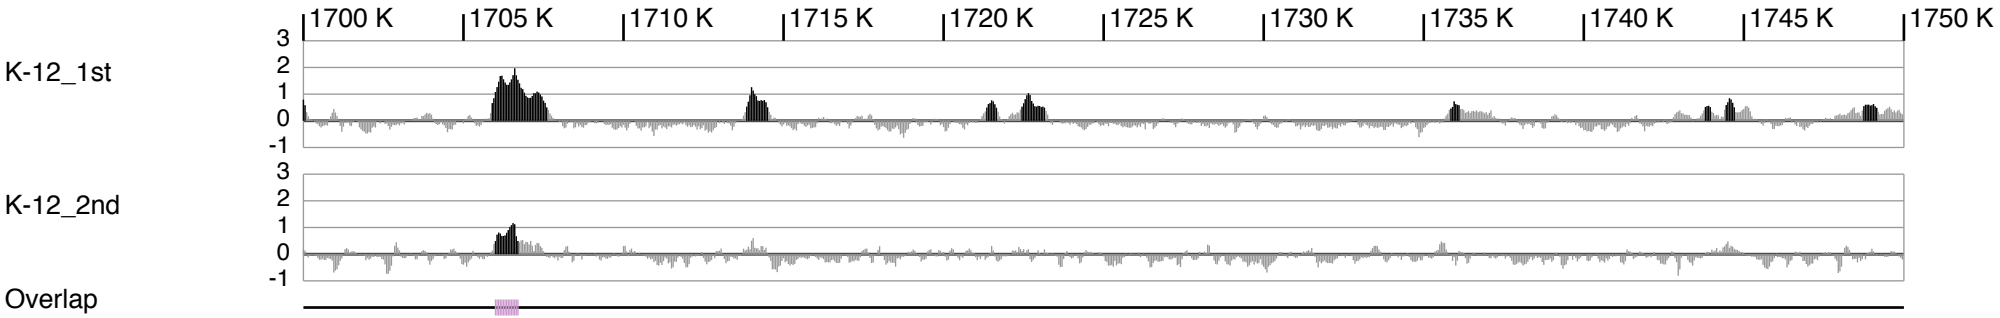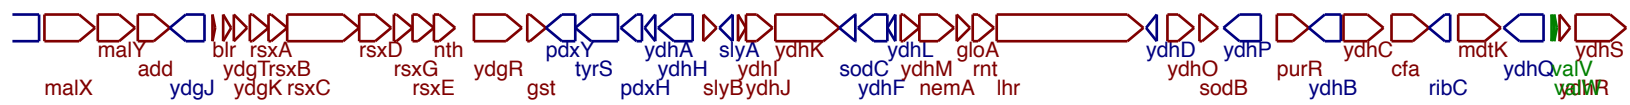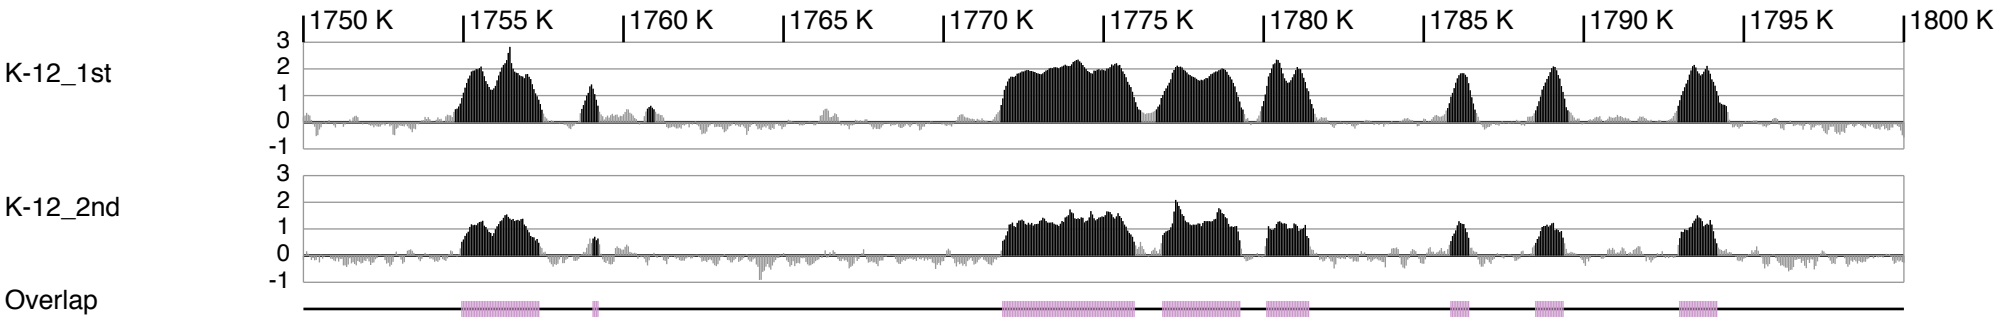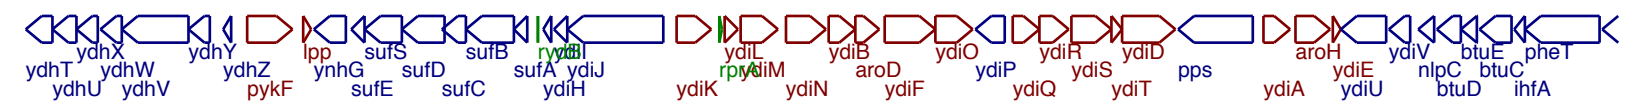









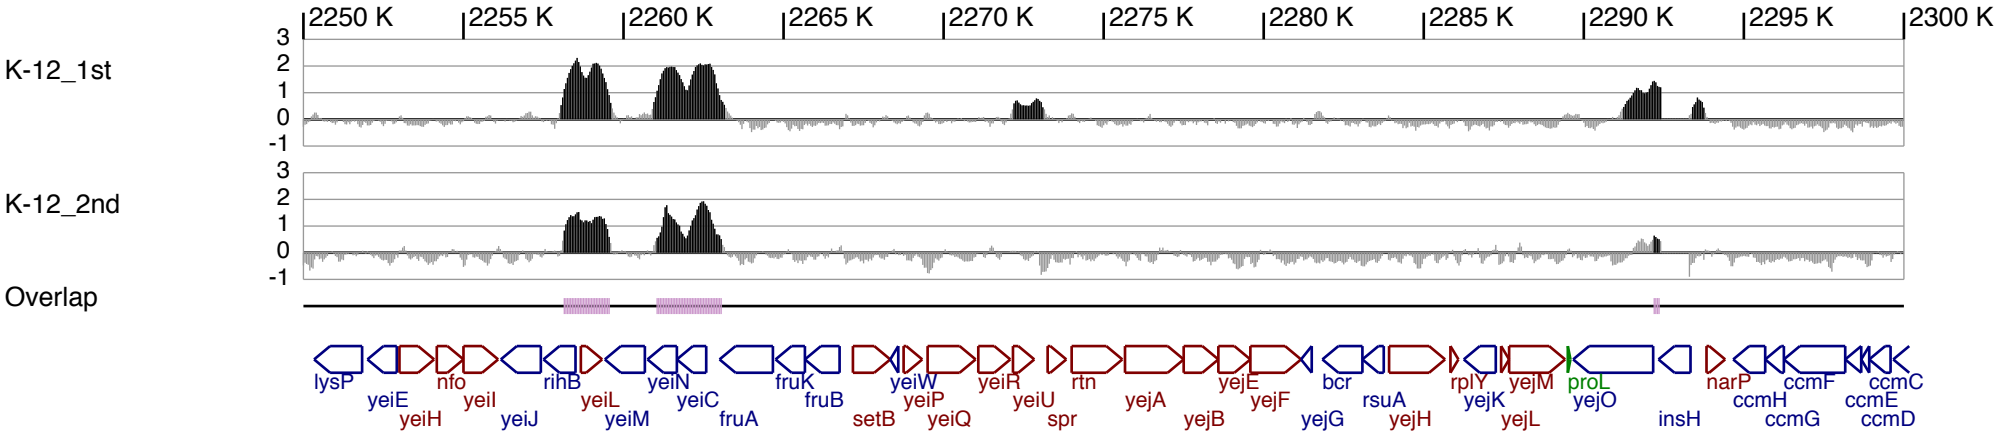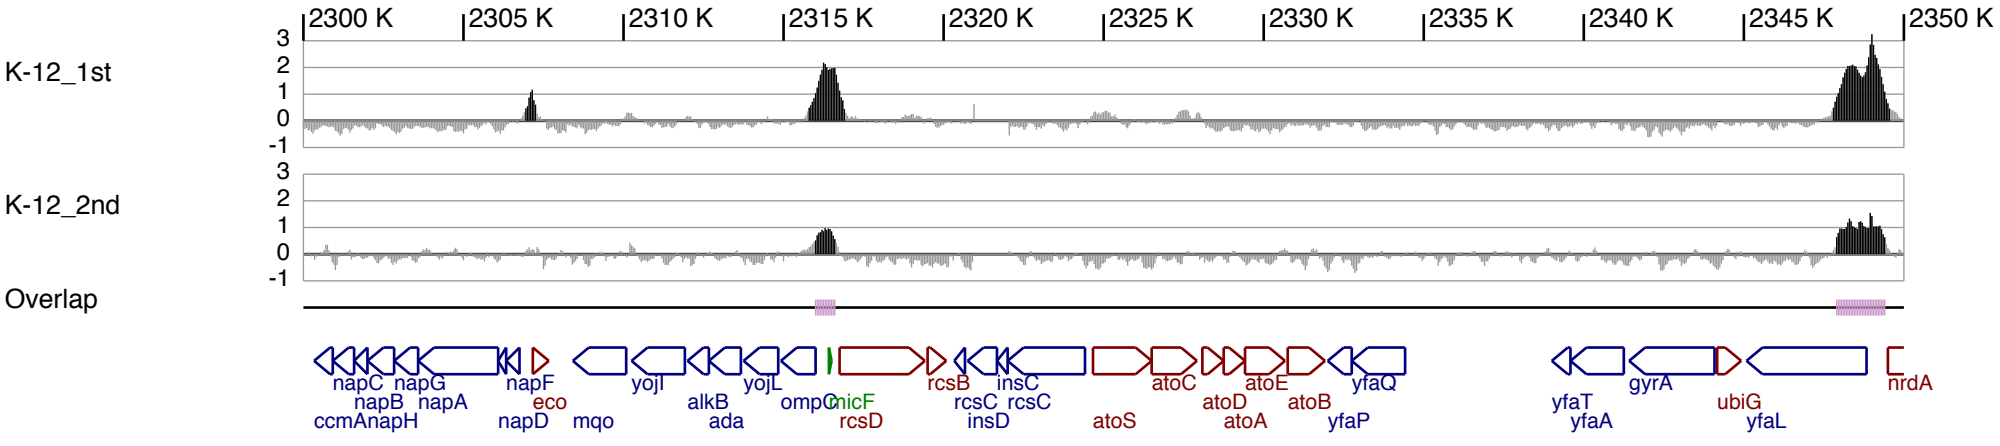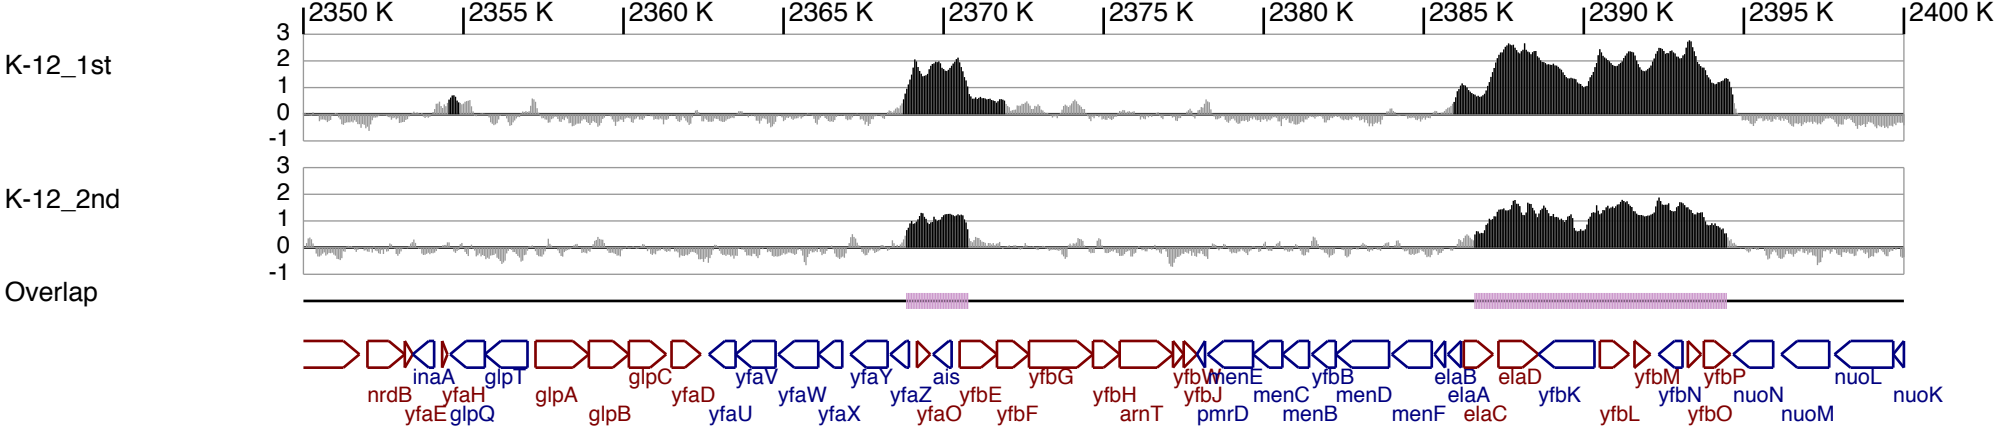

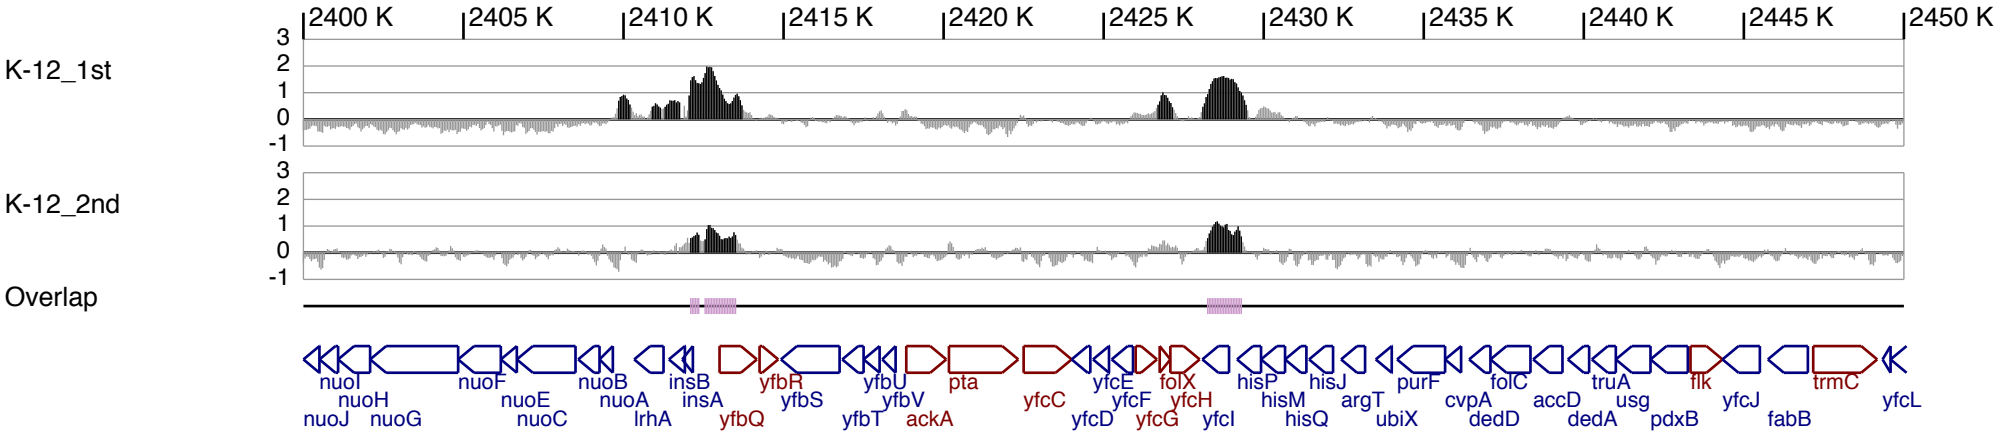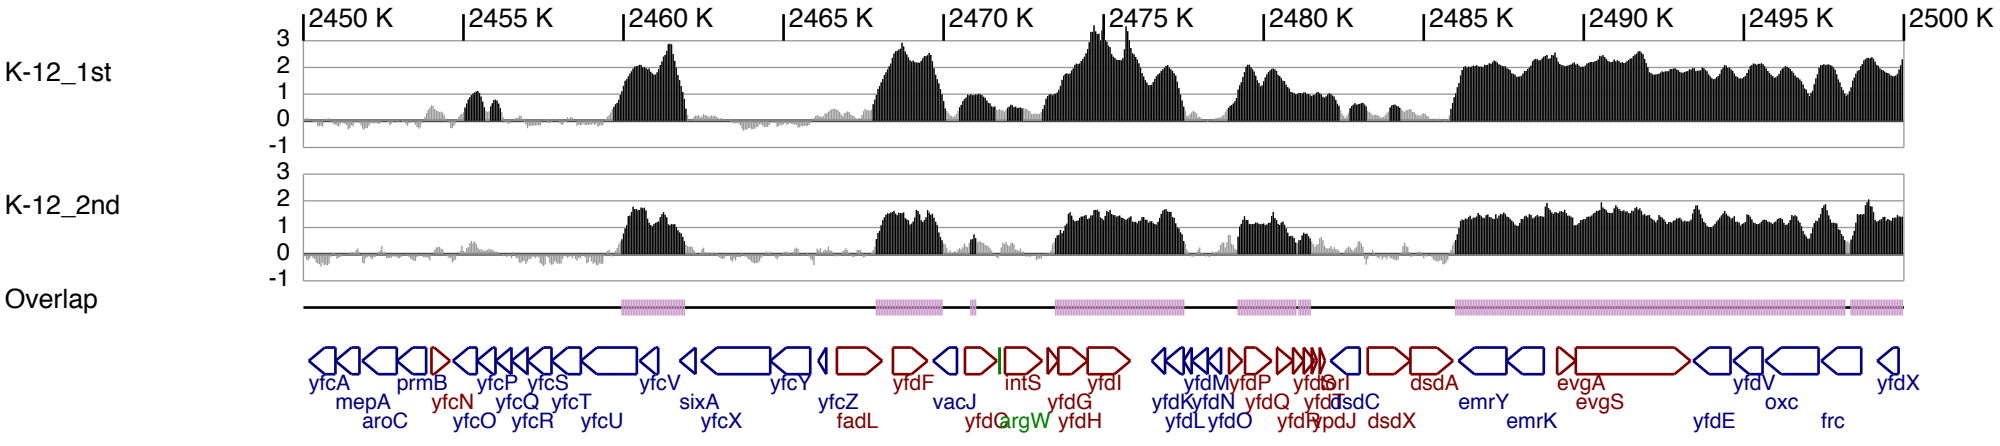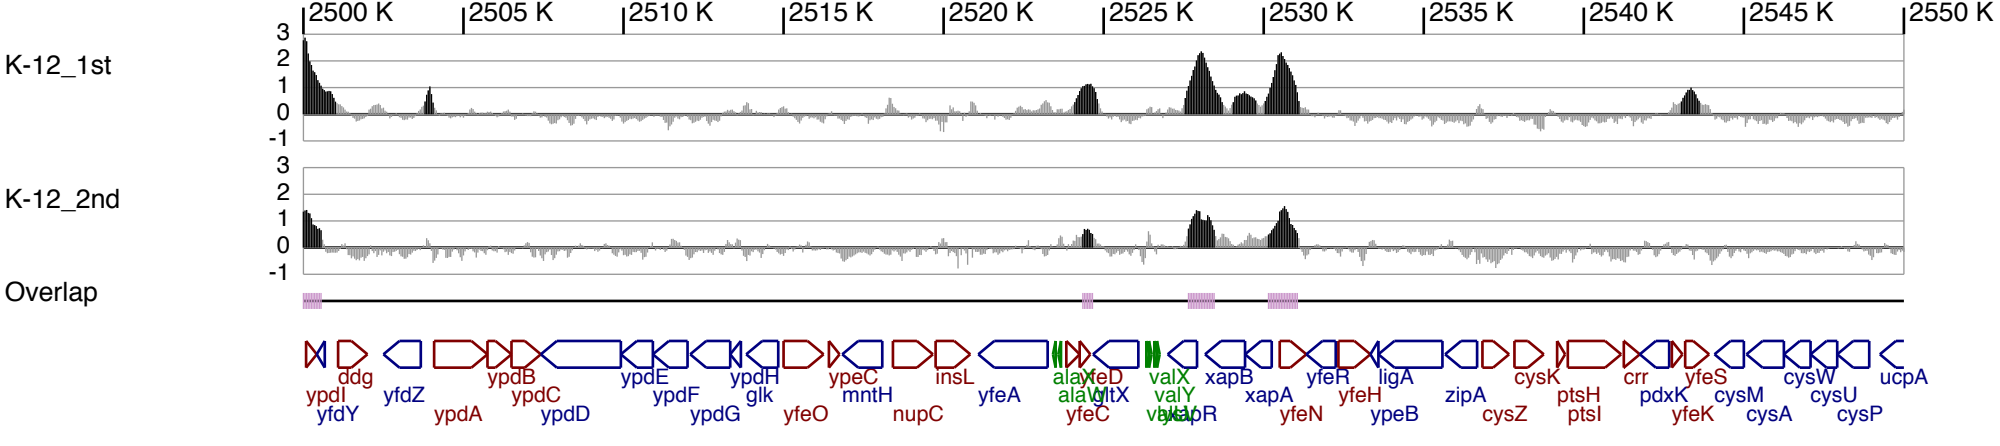

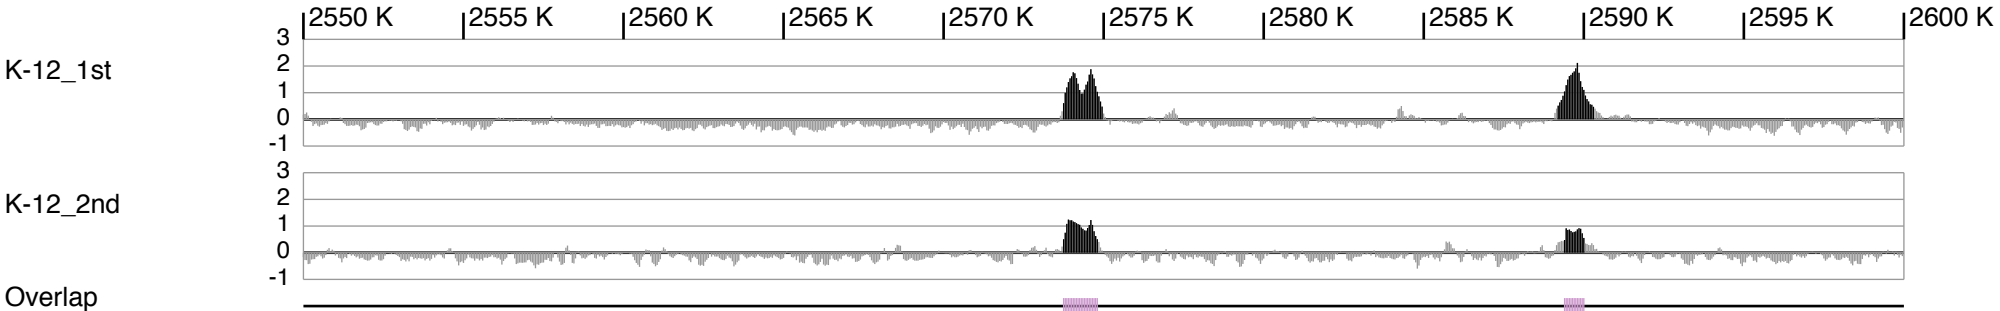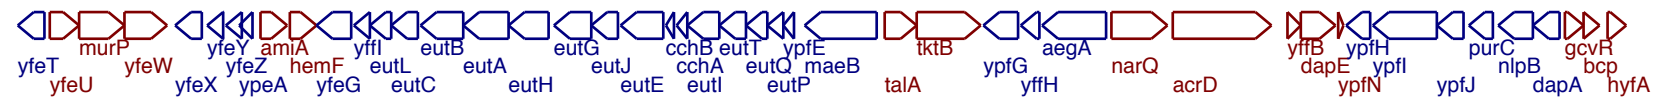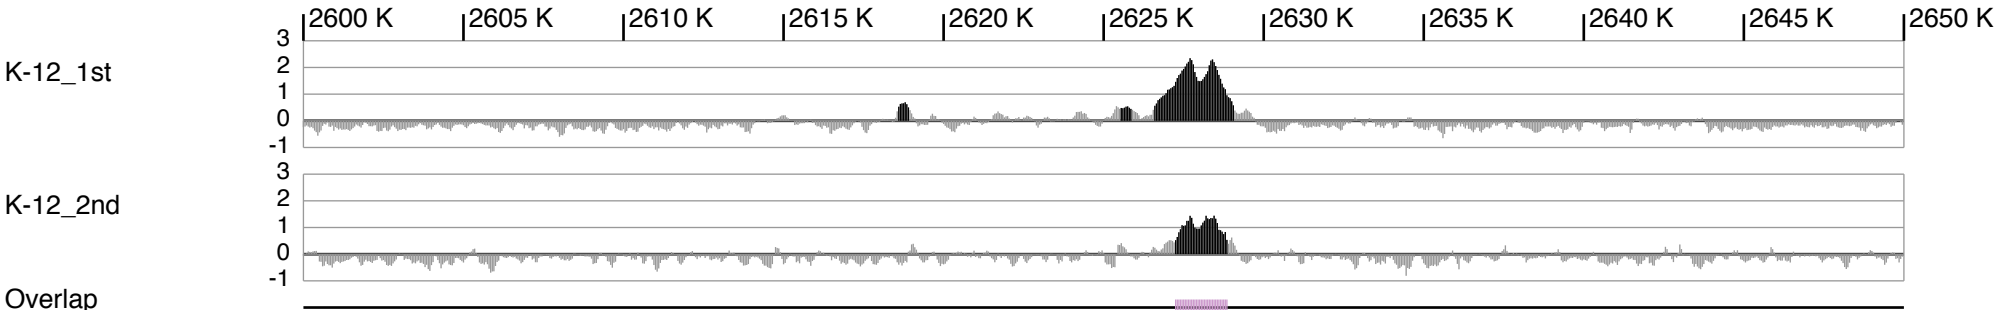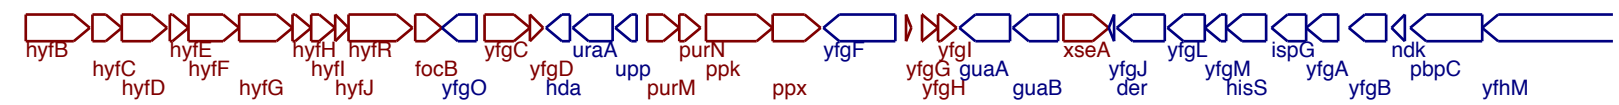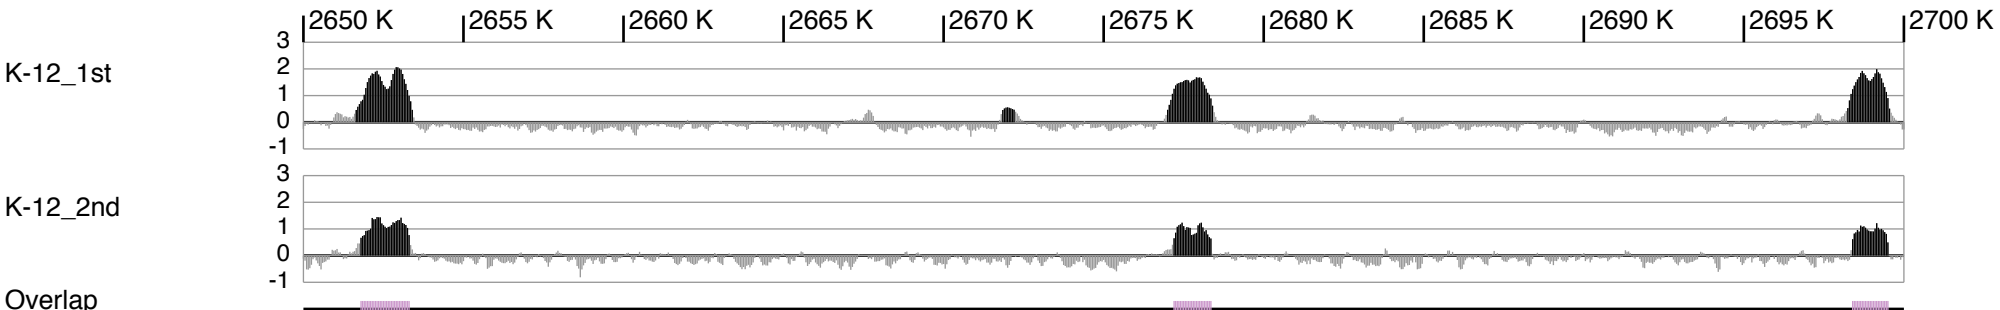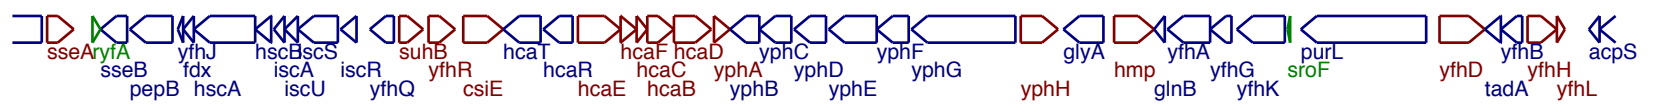



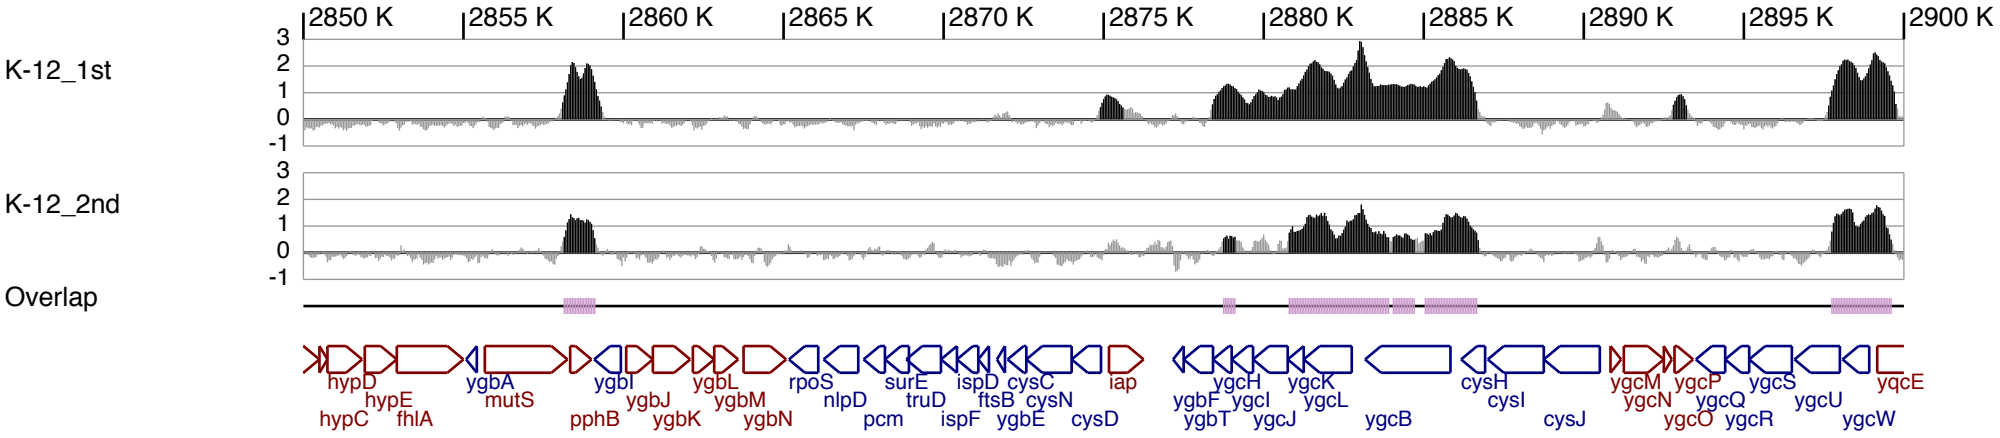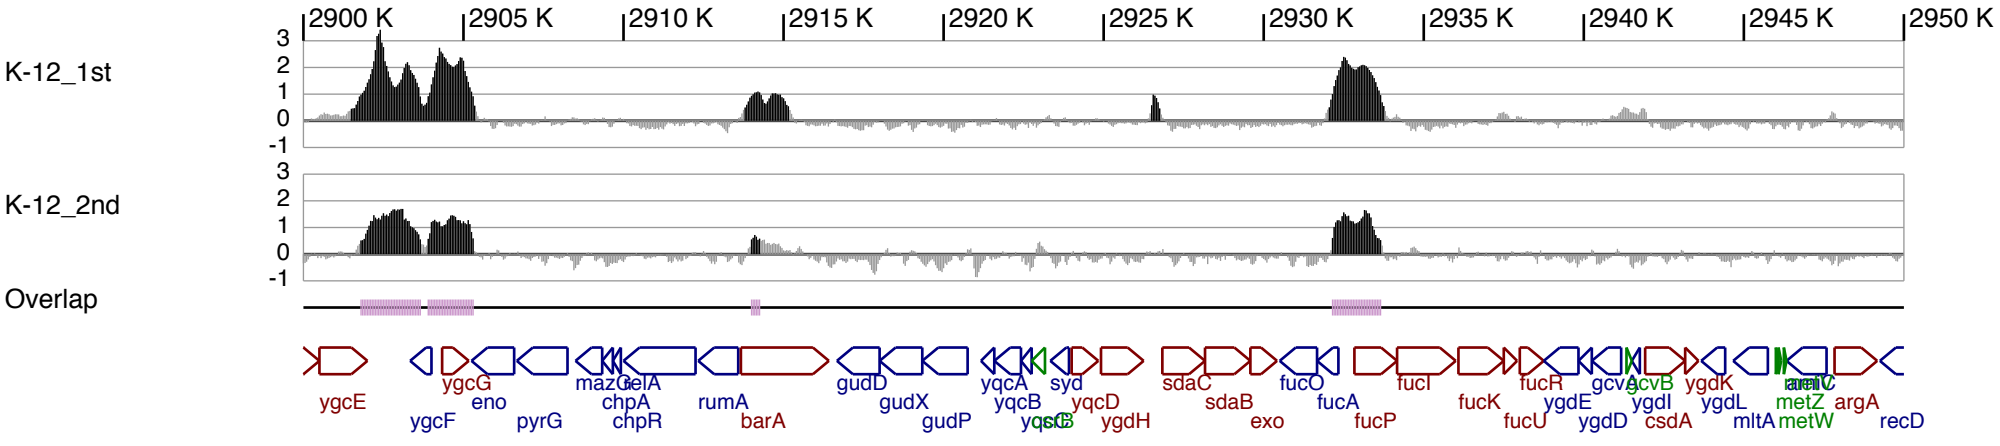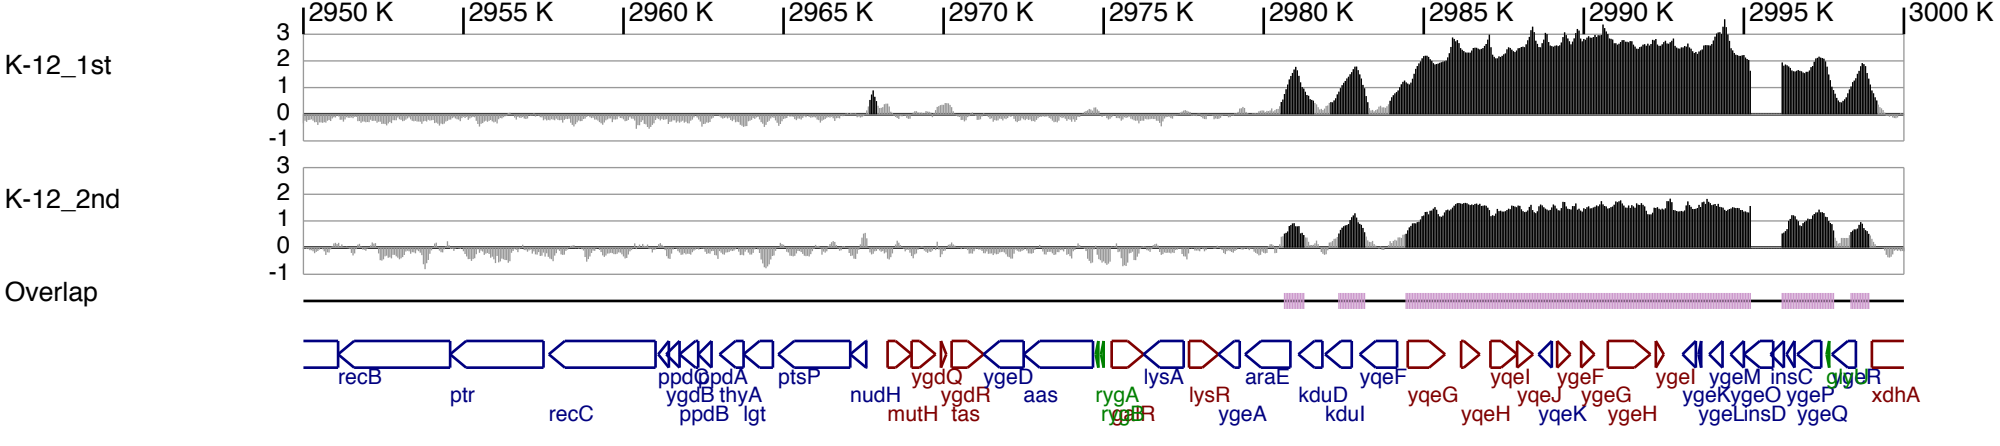



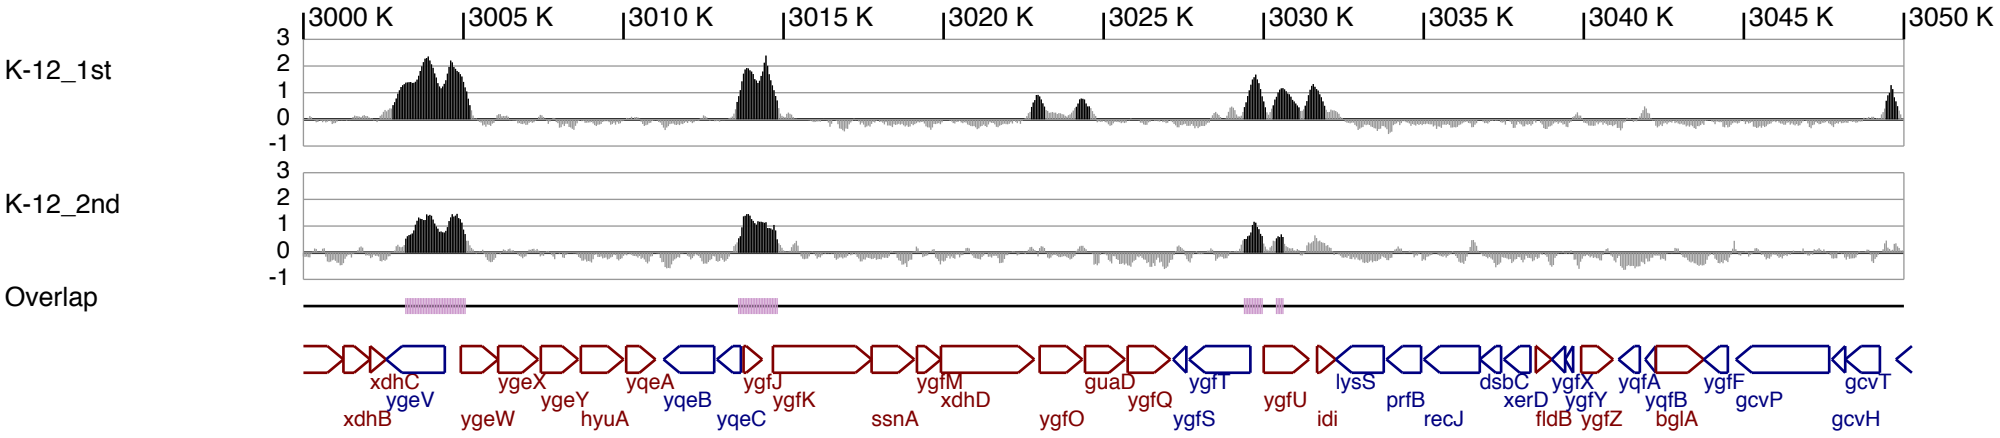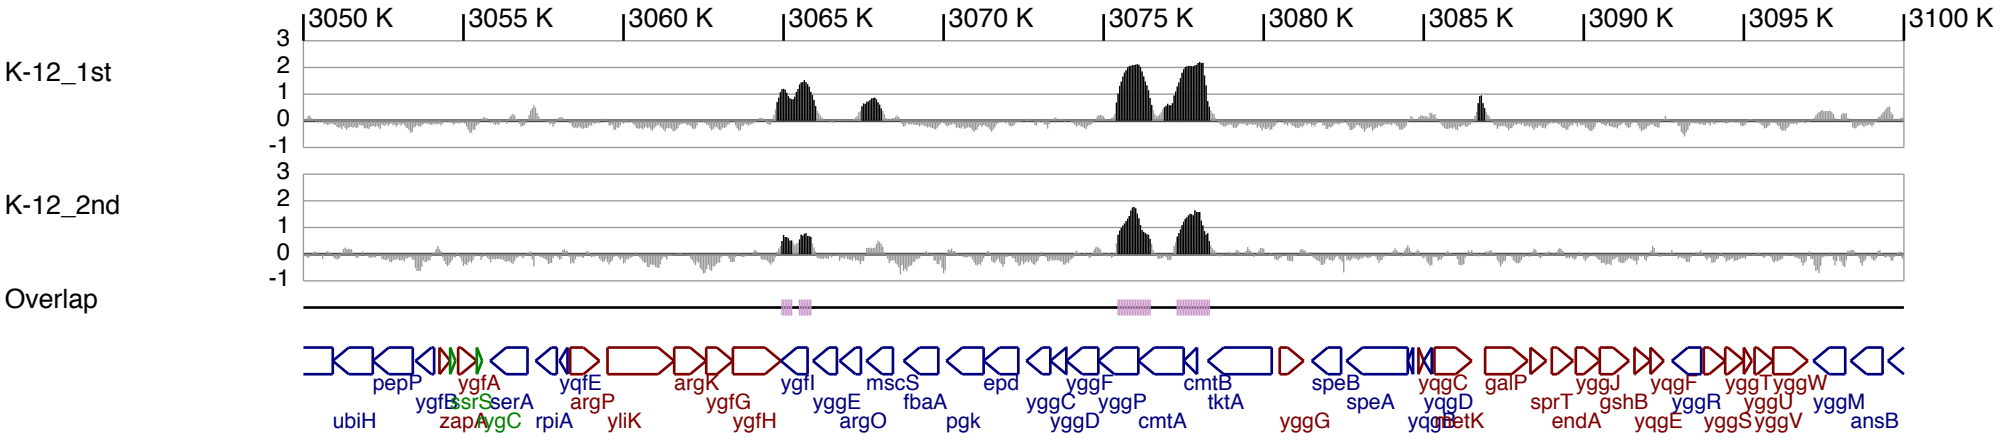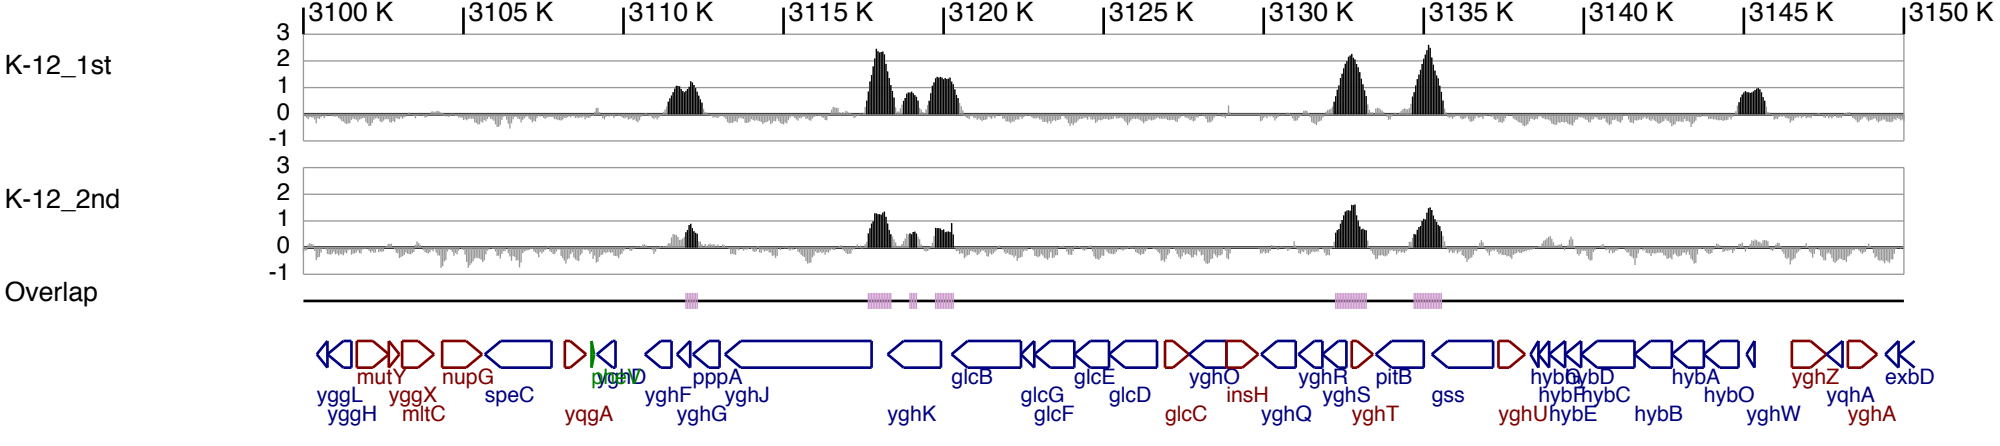

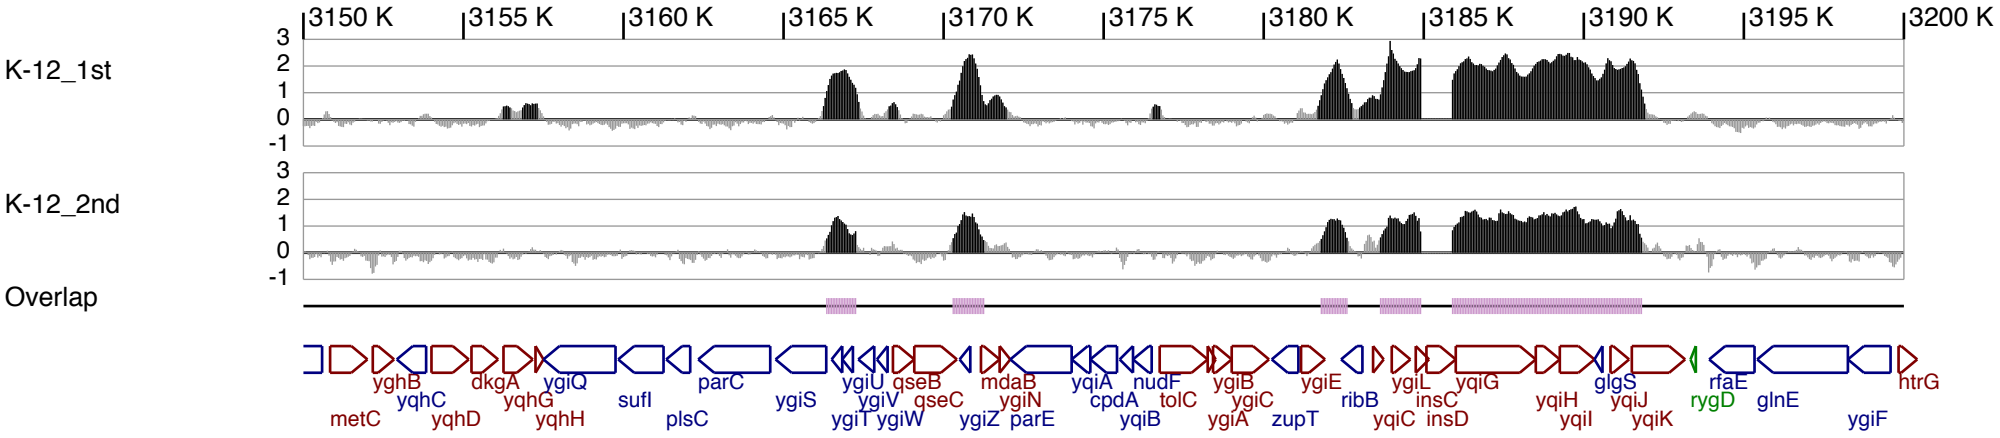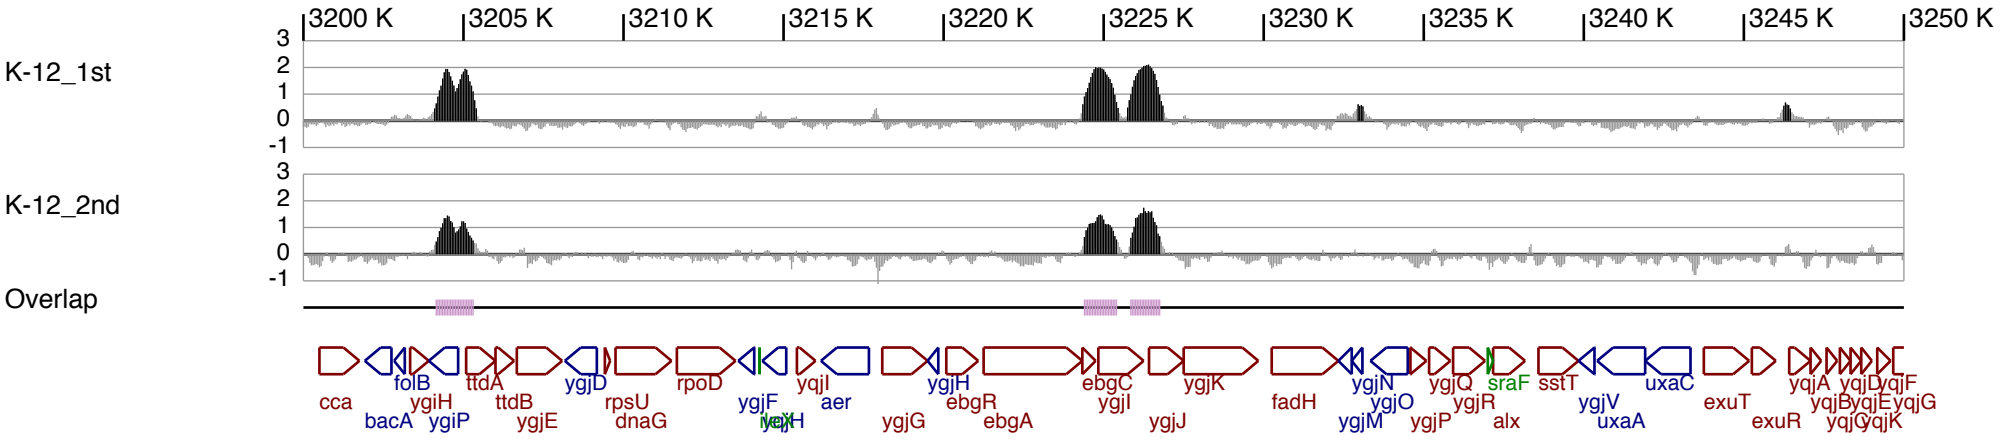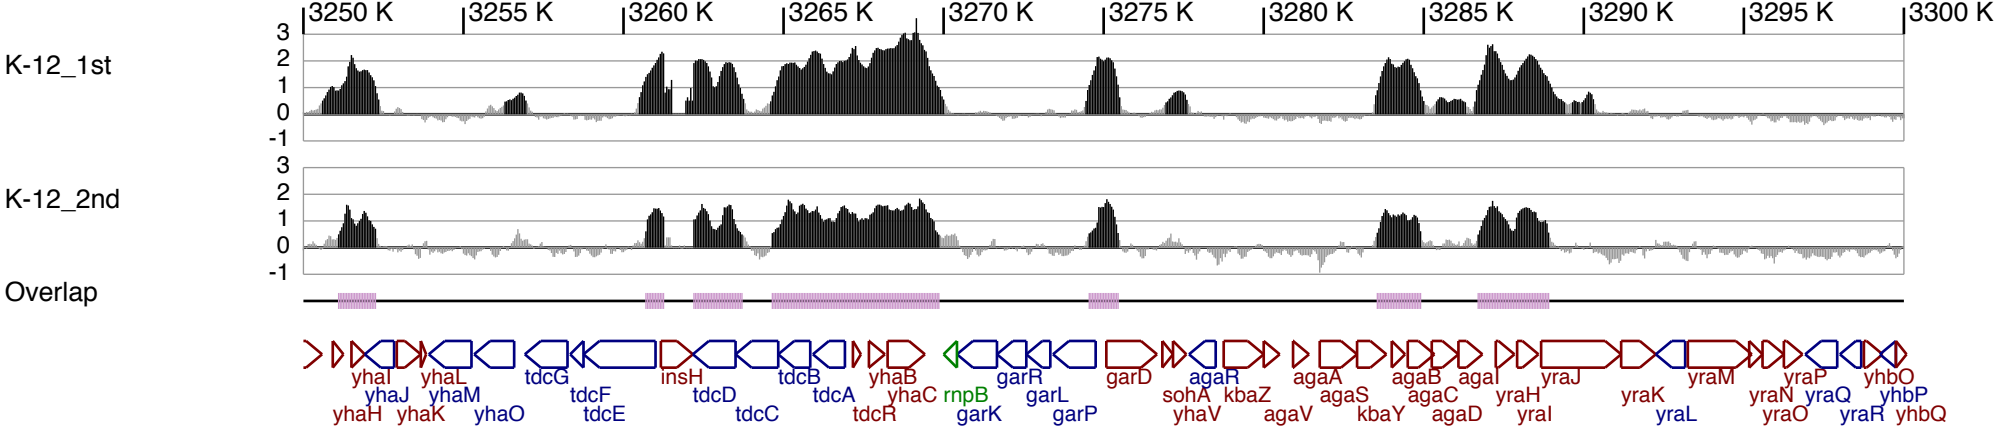

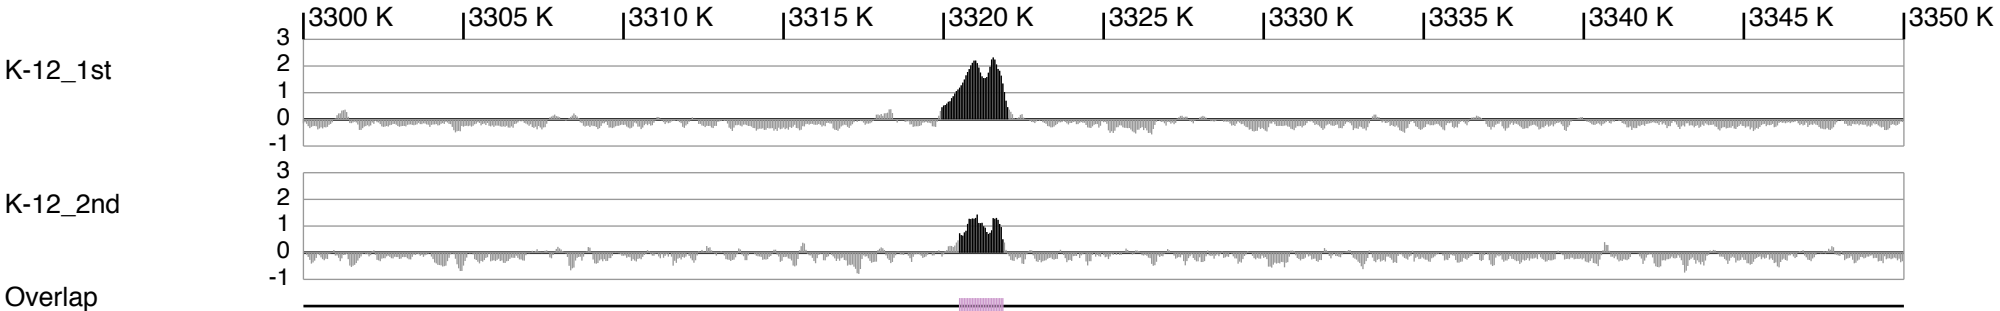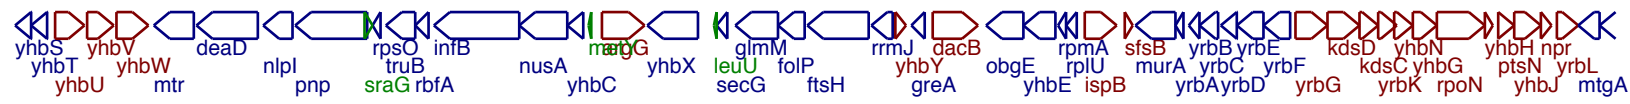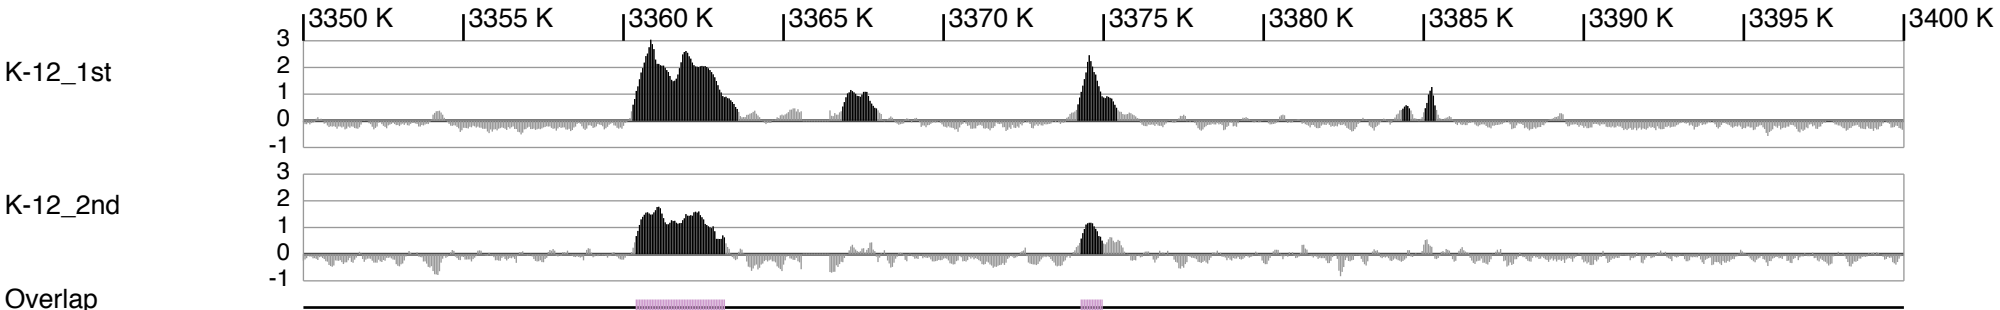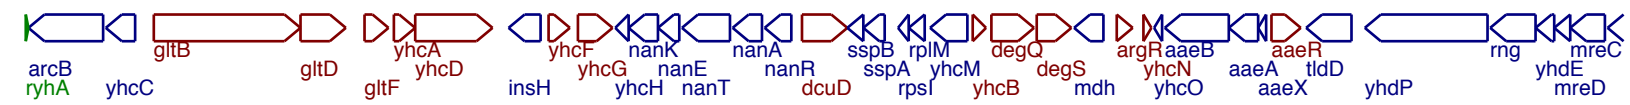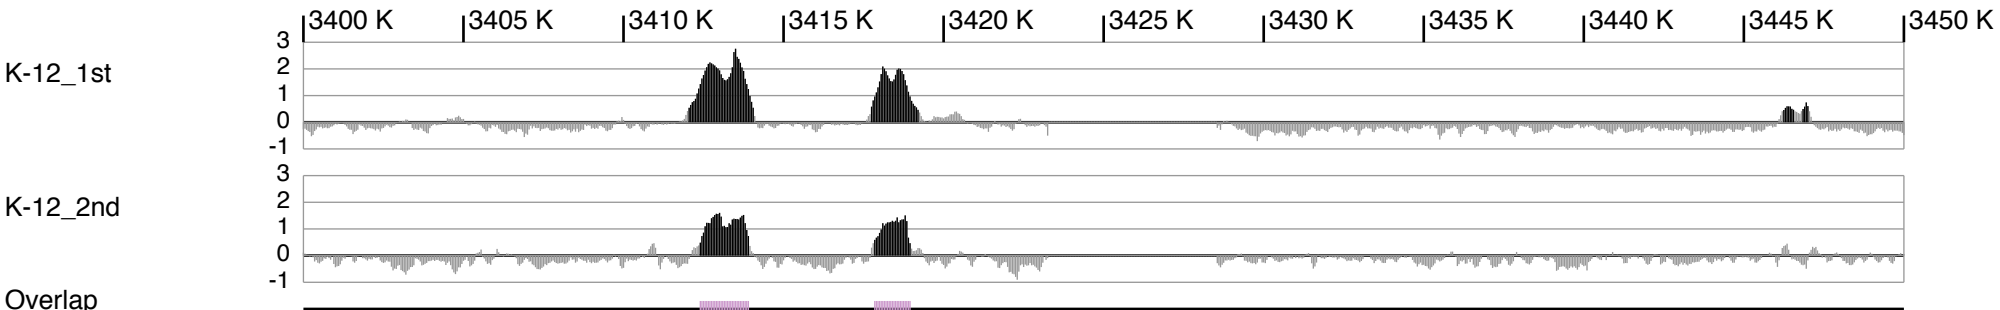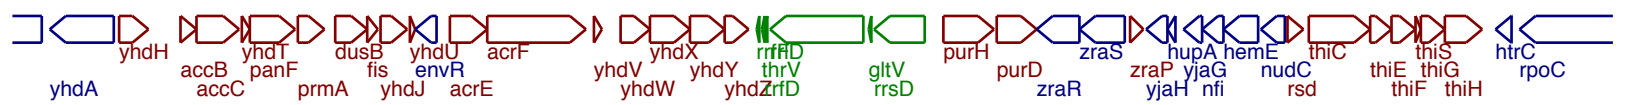

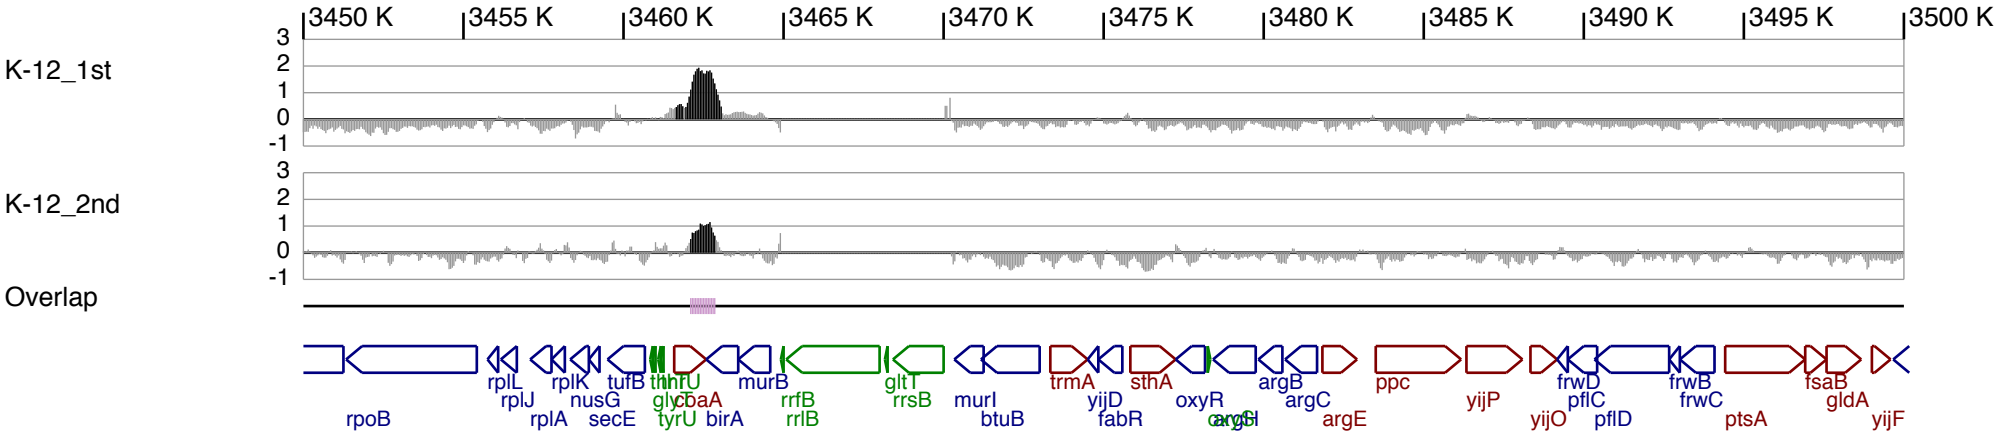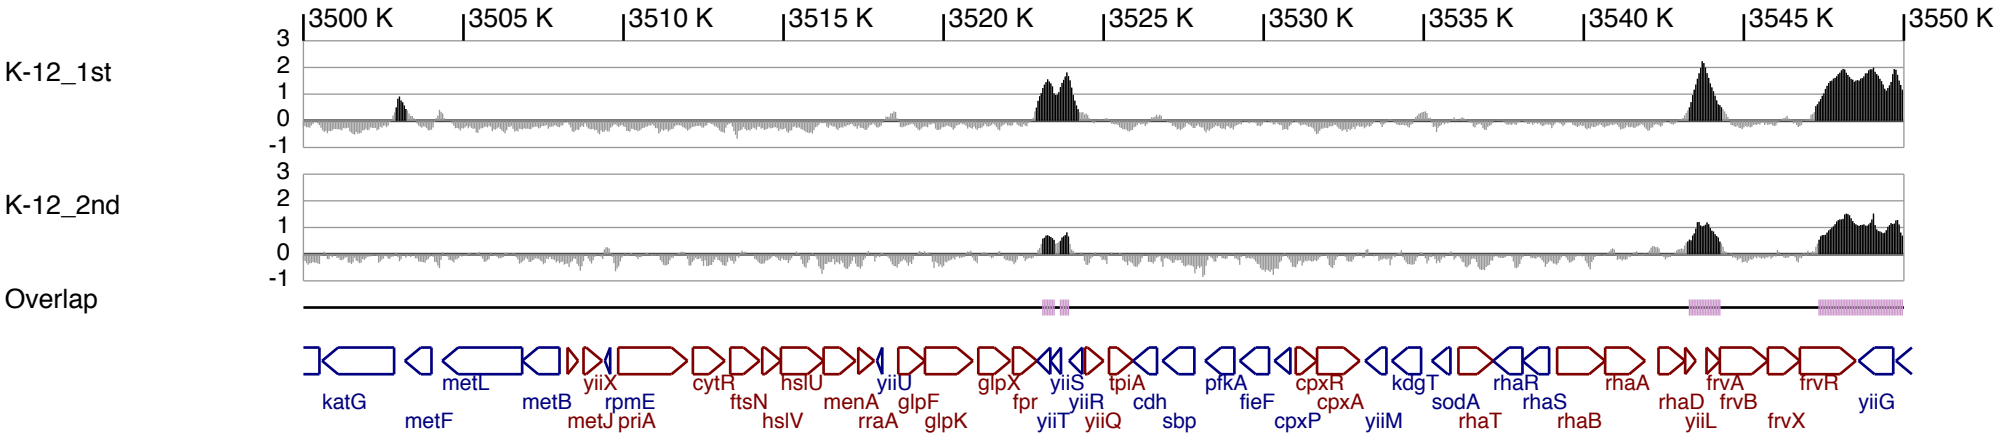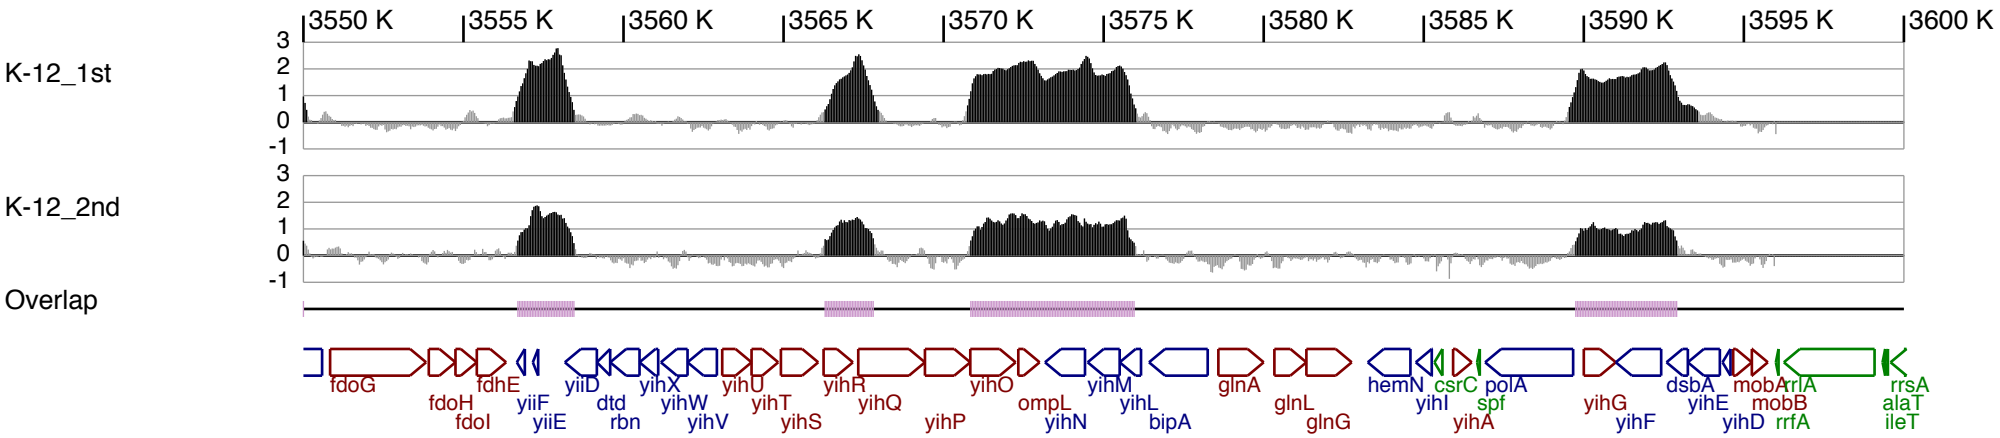















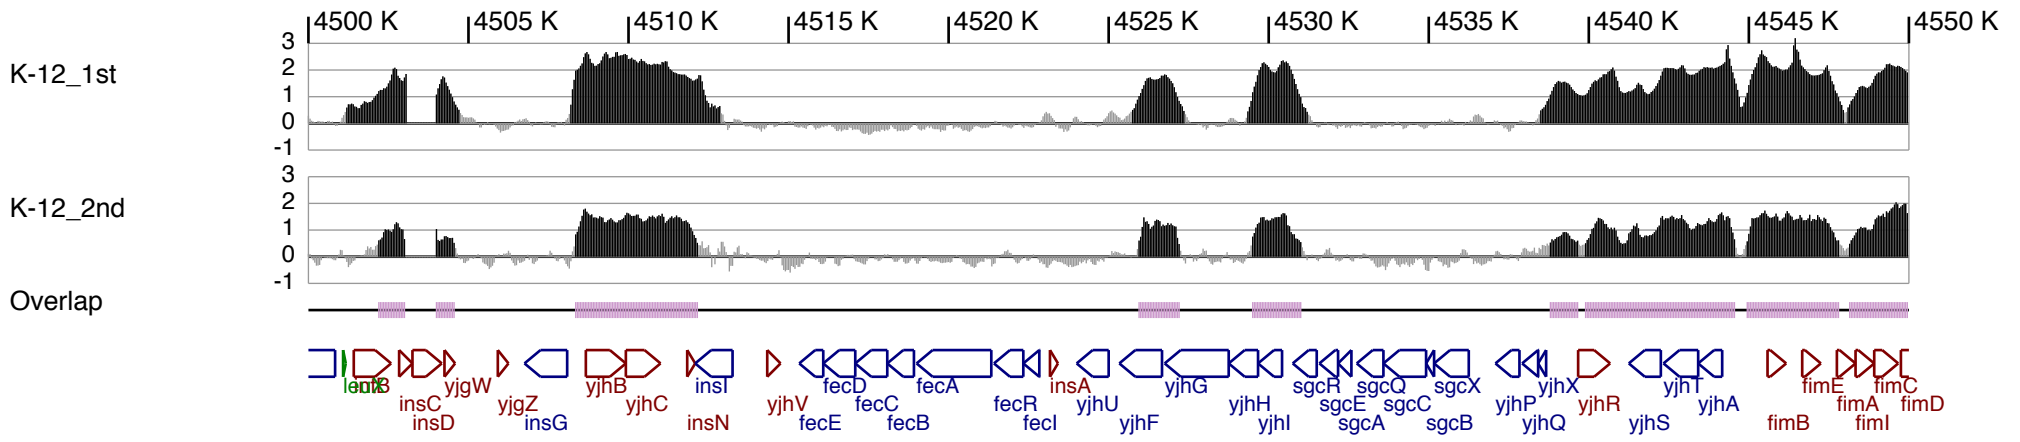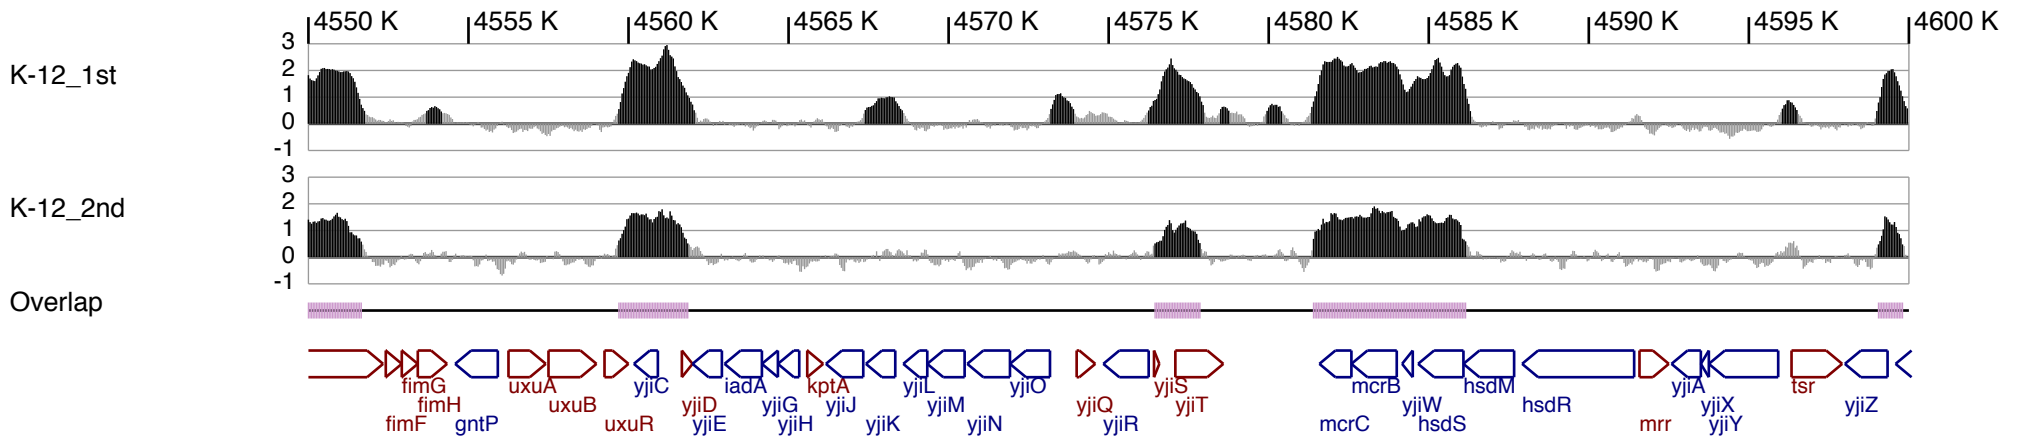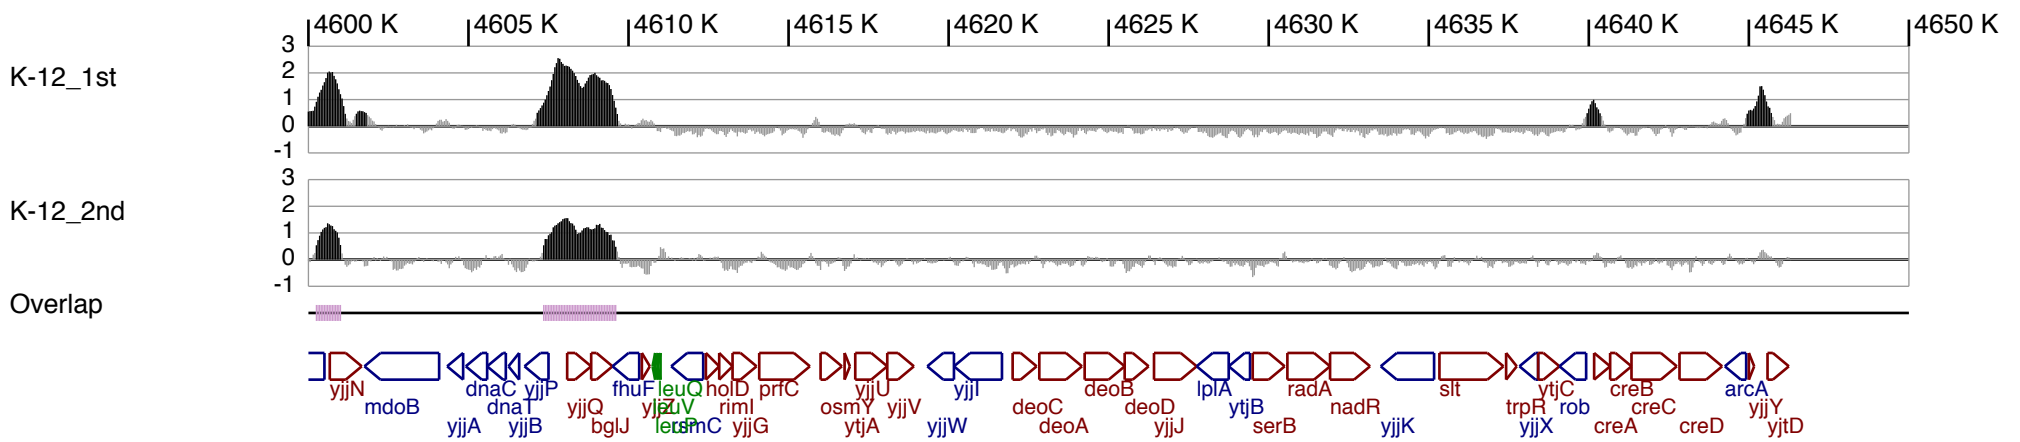

Supplement: pgen.1005796.s006.pdf [file pgen.1005796.s006.pdf]
