# Supplementary material for: H-NS Facilitates Sequence Diversification of Horizontally Transferred DNAs during Their Integration in Host Chromosomes
Source: PubMed Central journal article supplement (PMC4720273; doi:10.1371/journal.pgen.1005796), 2016-01-20

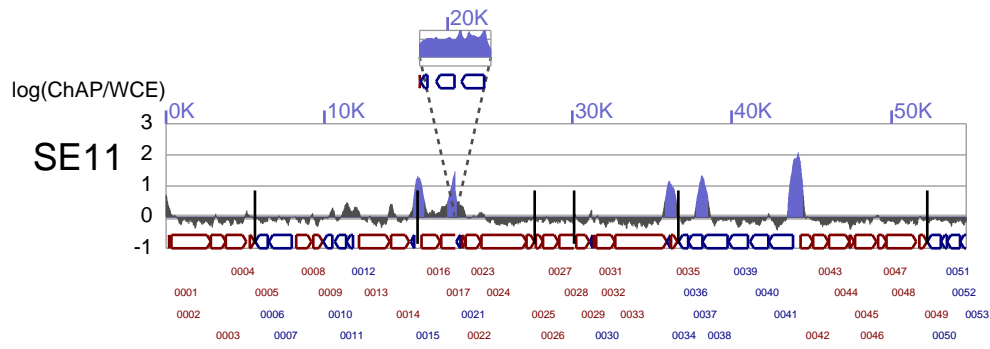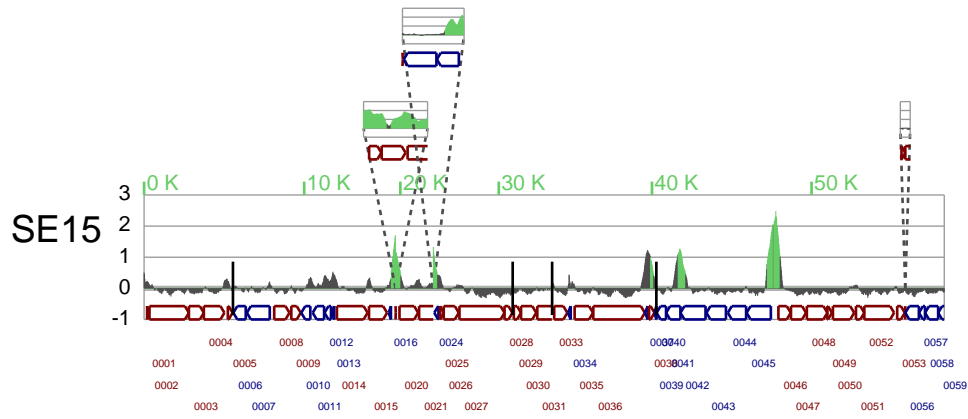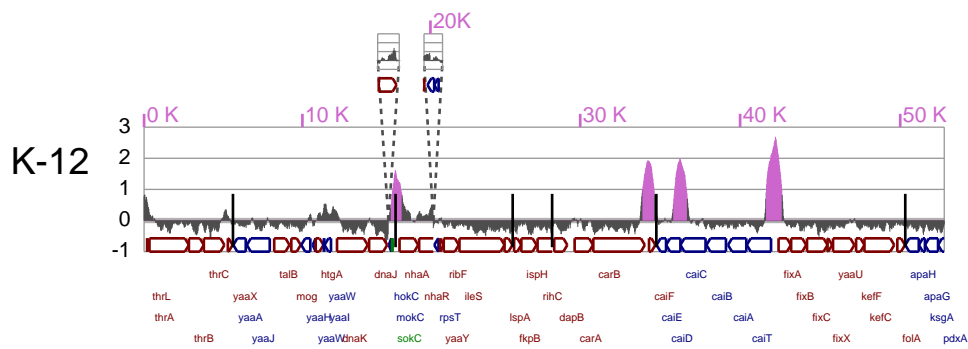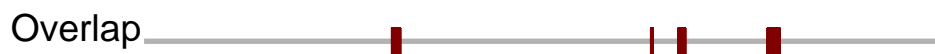

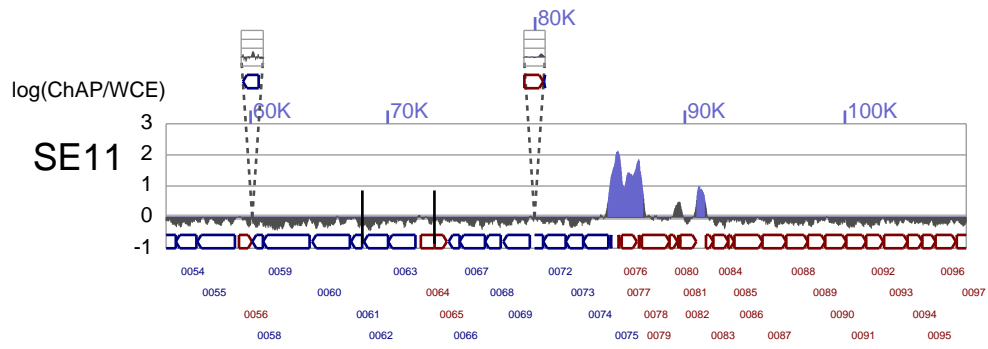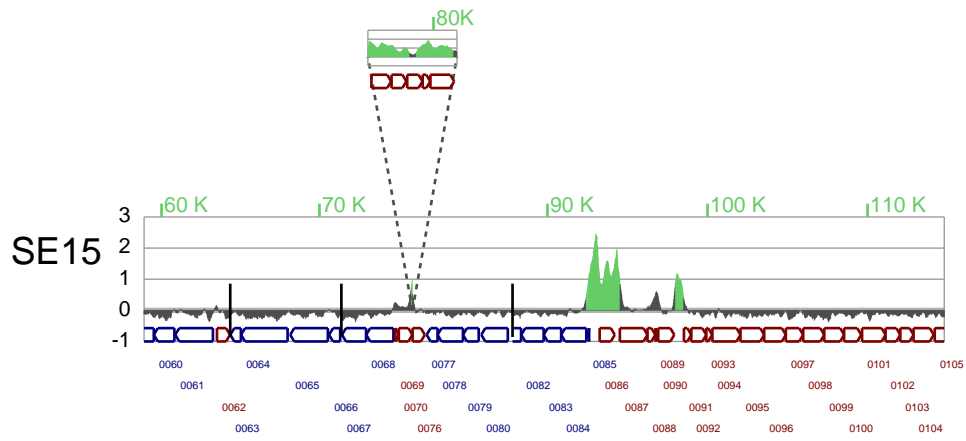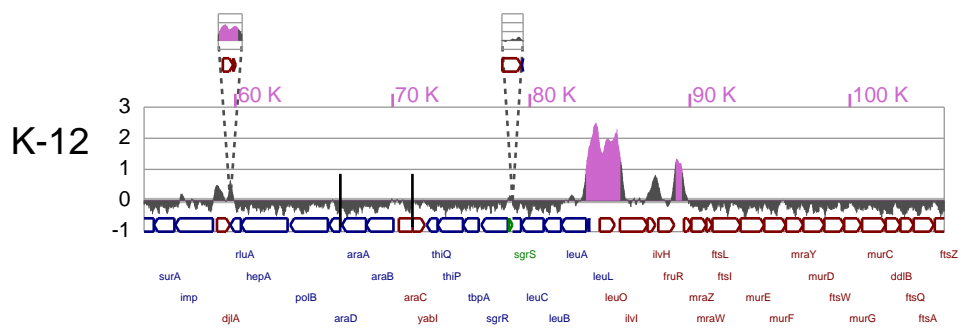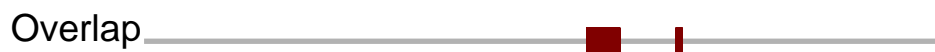

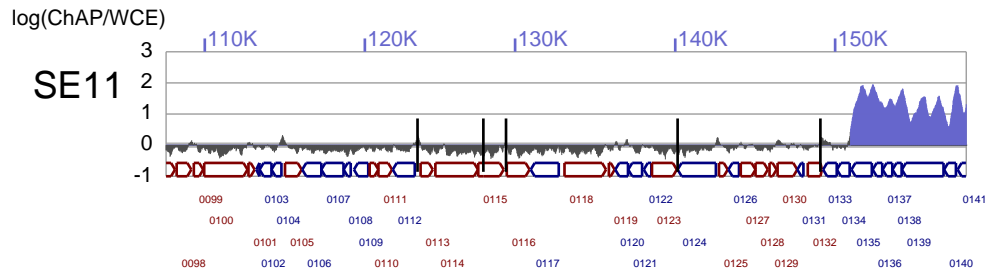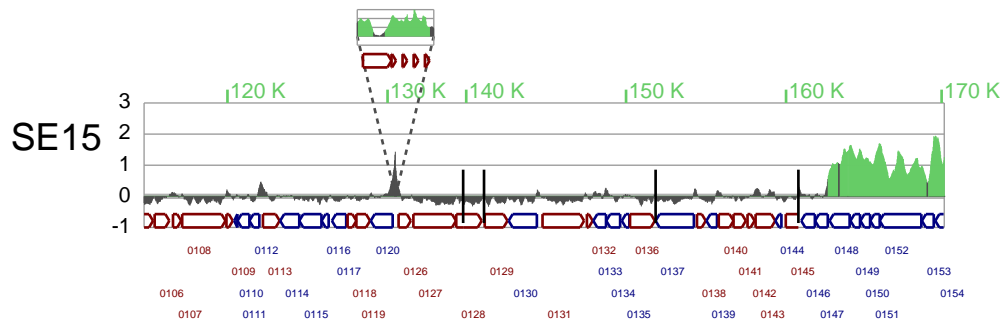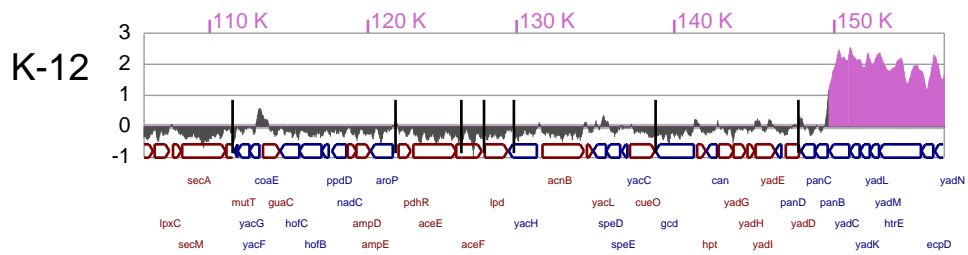

Overlap

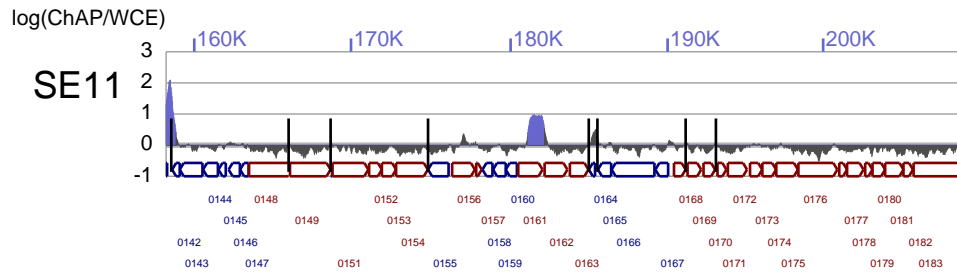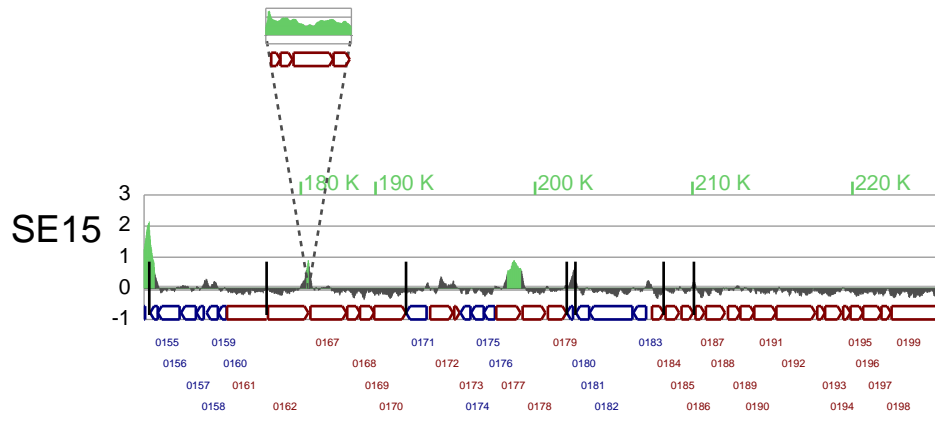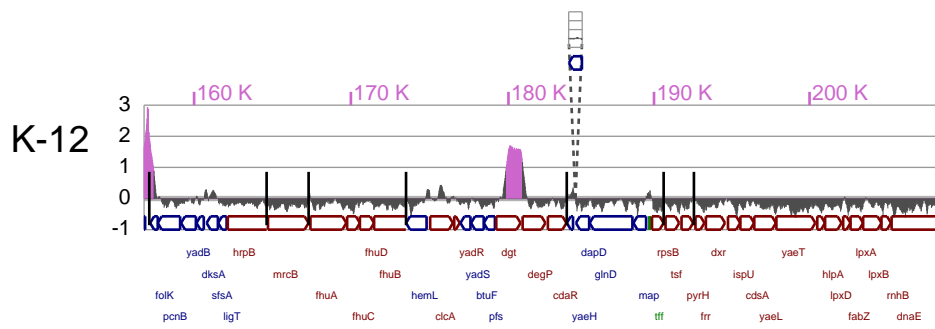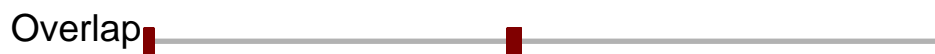

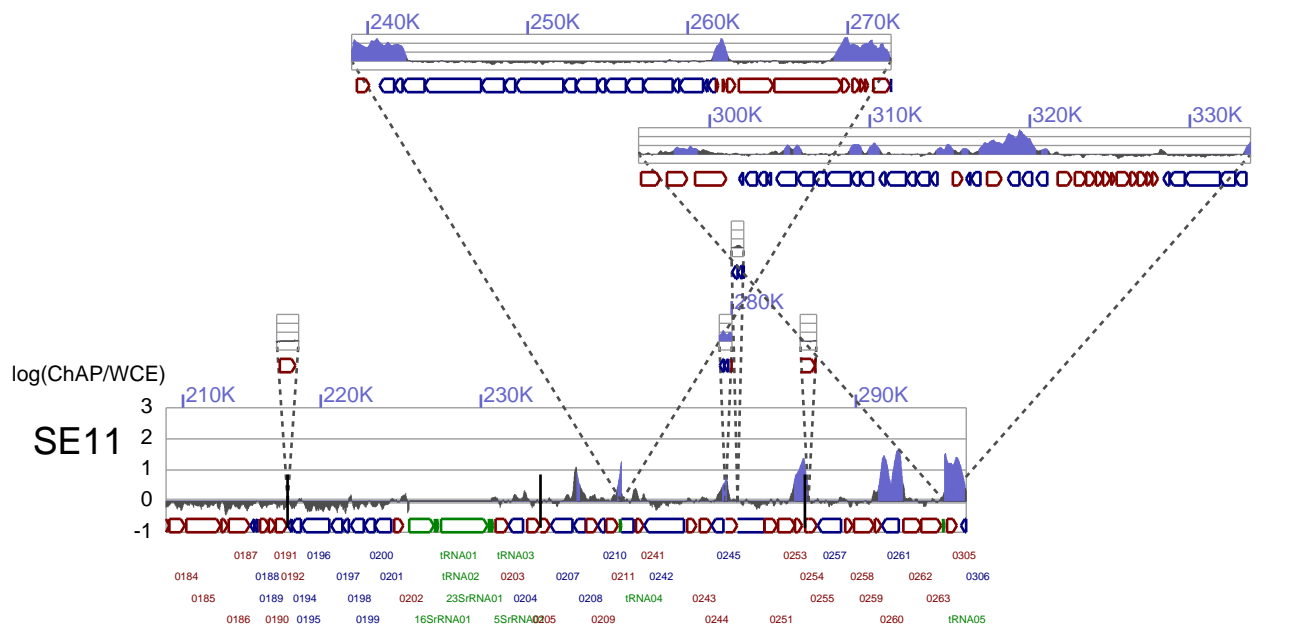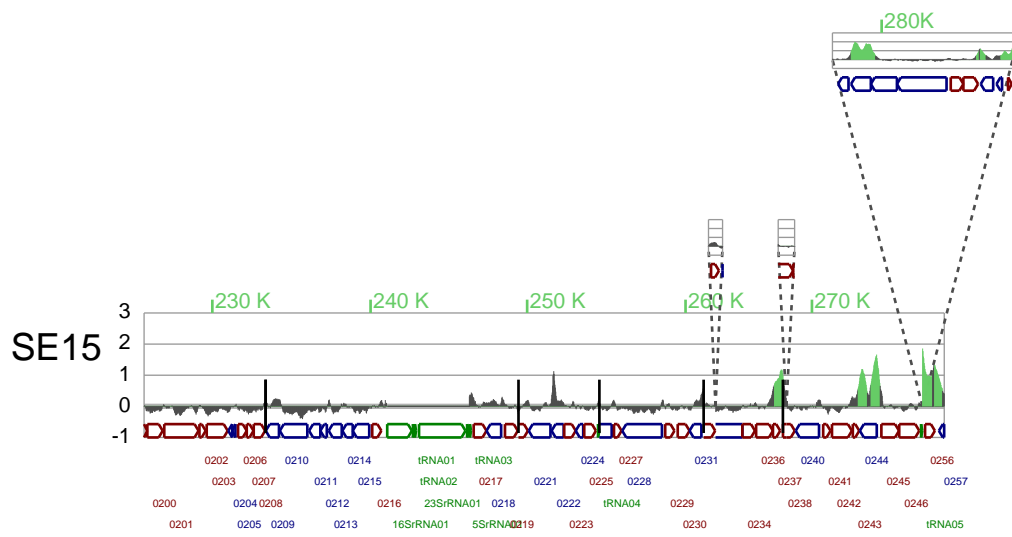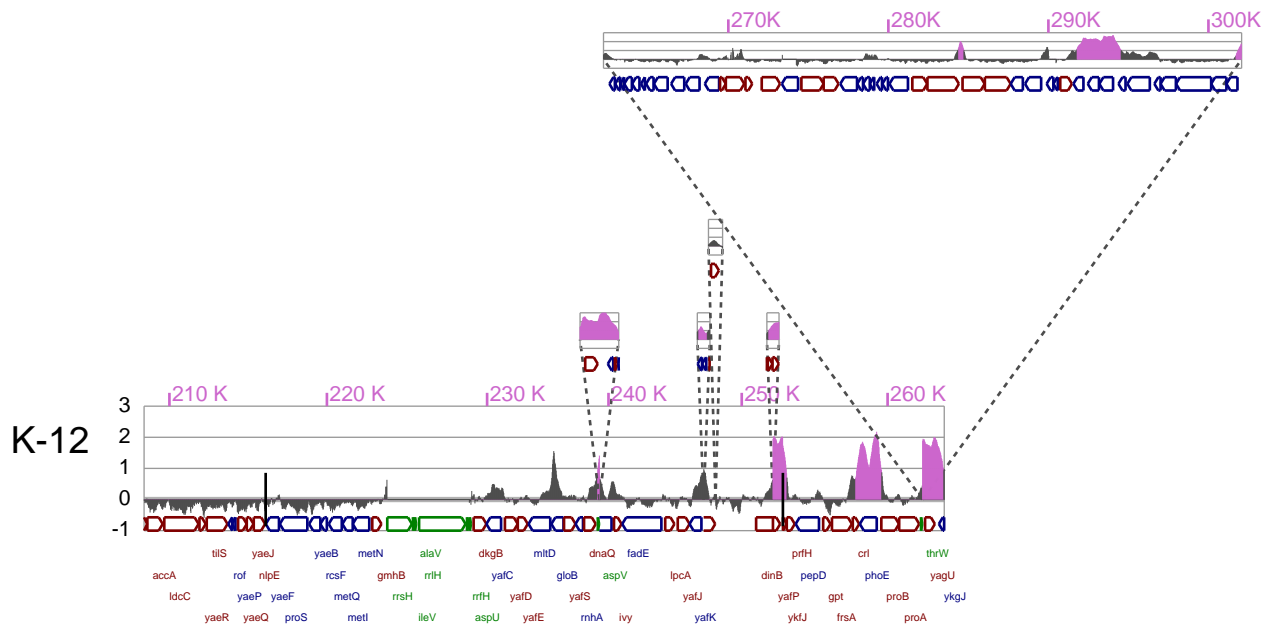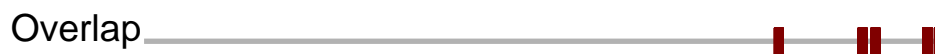

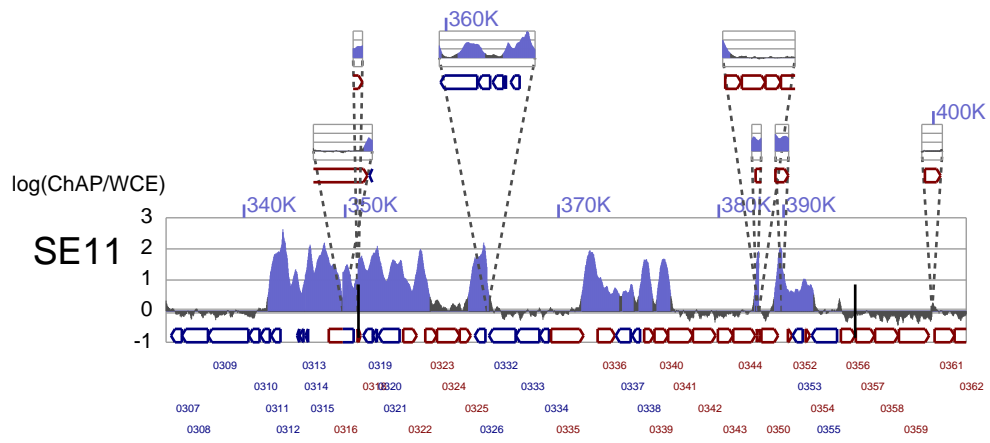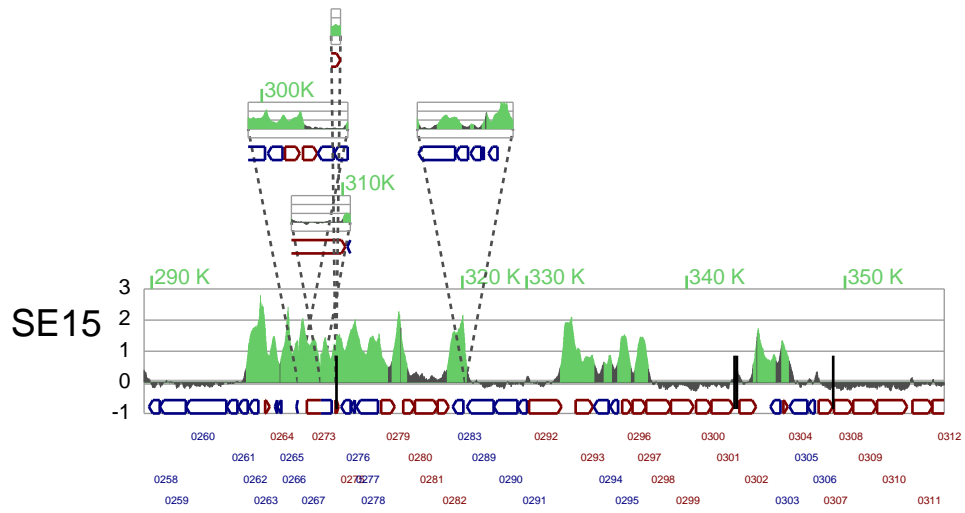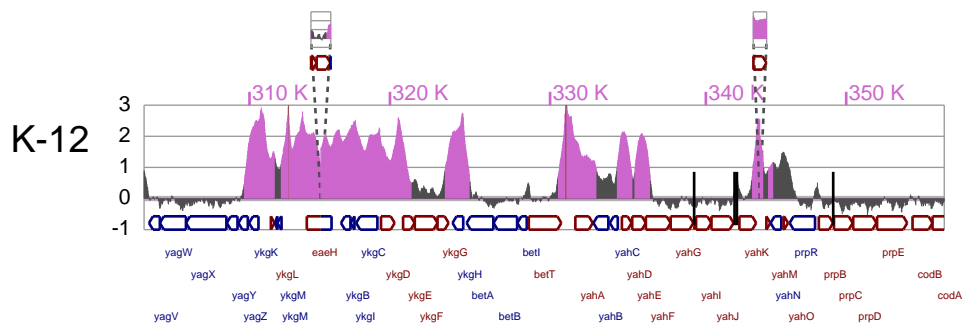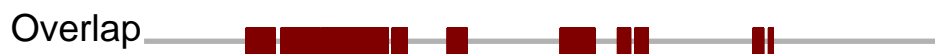

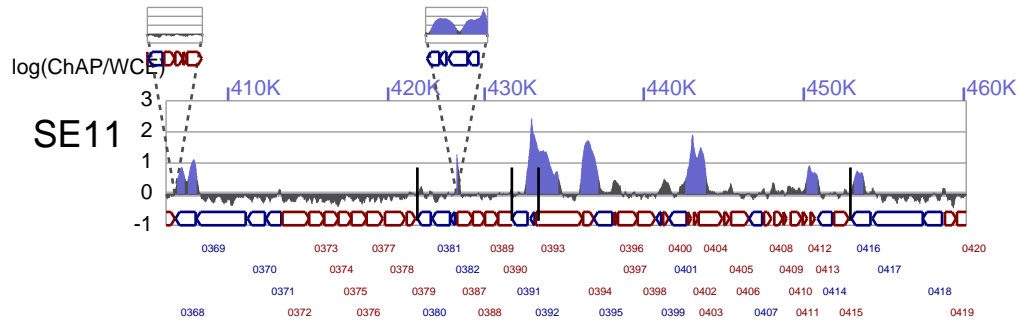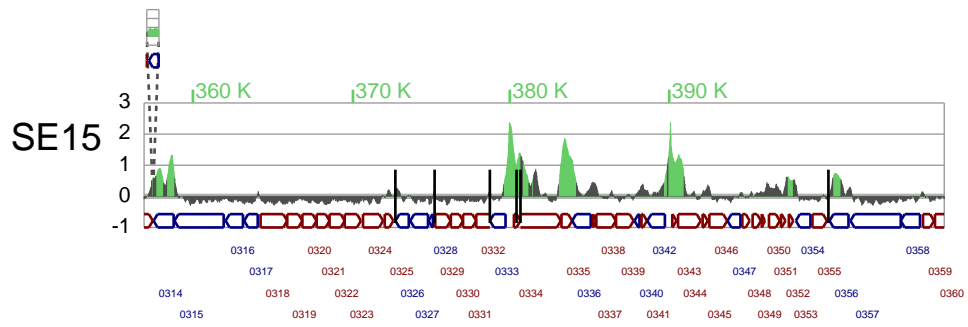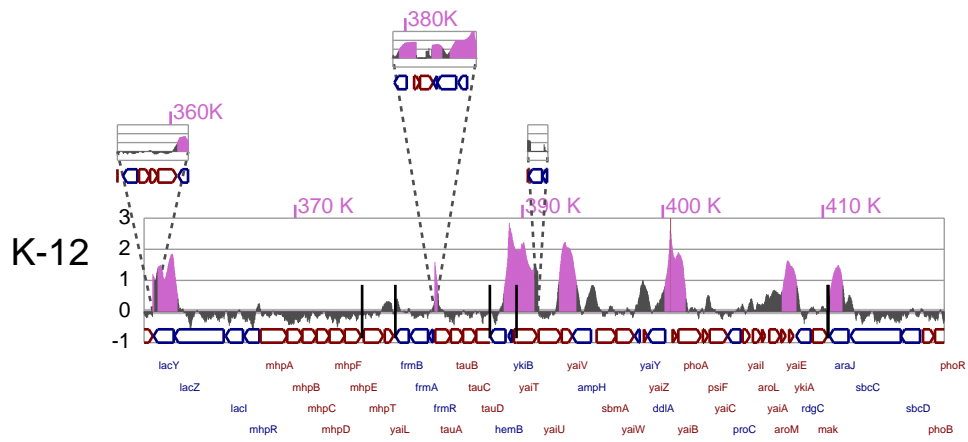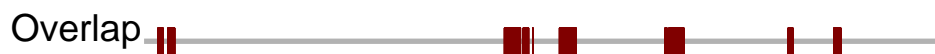

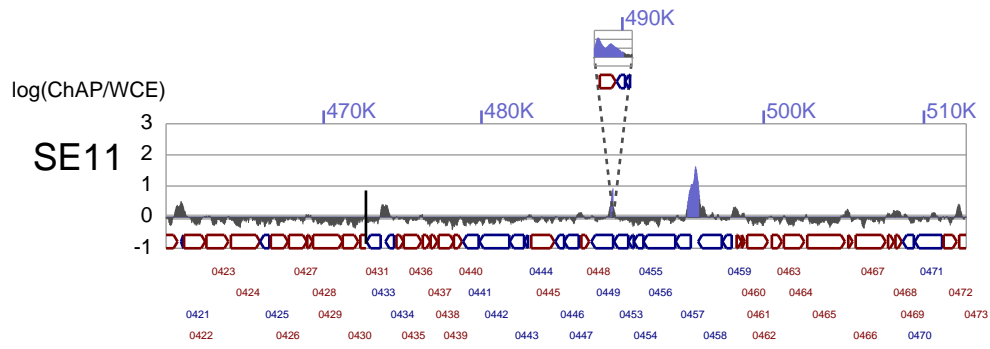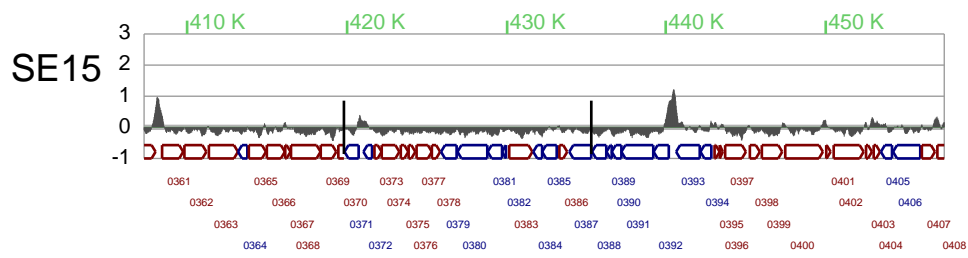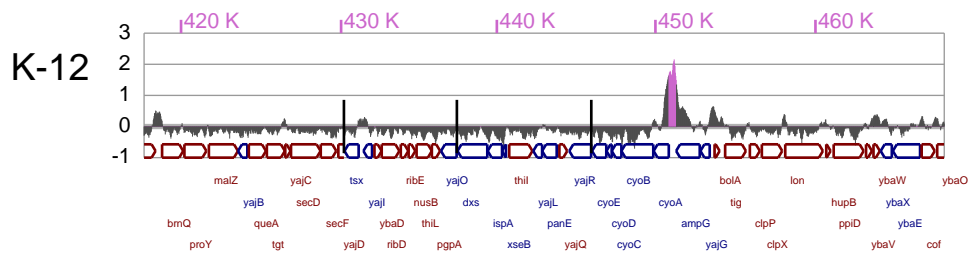

Overlap



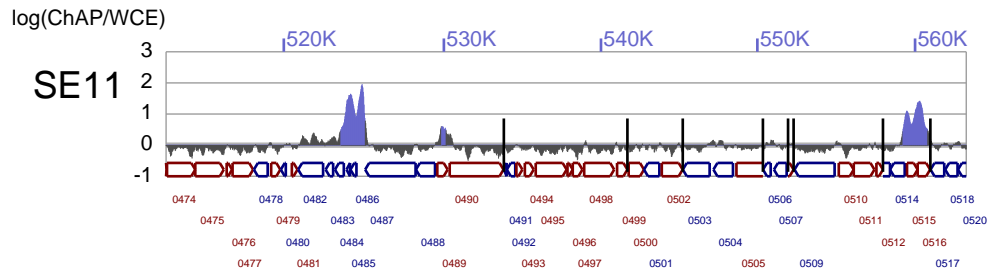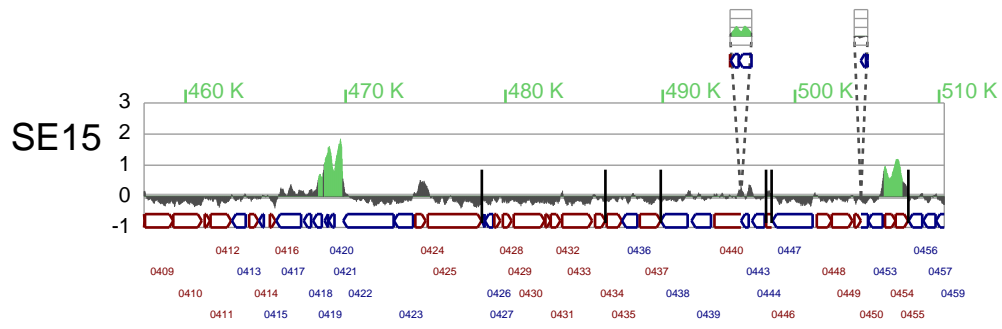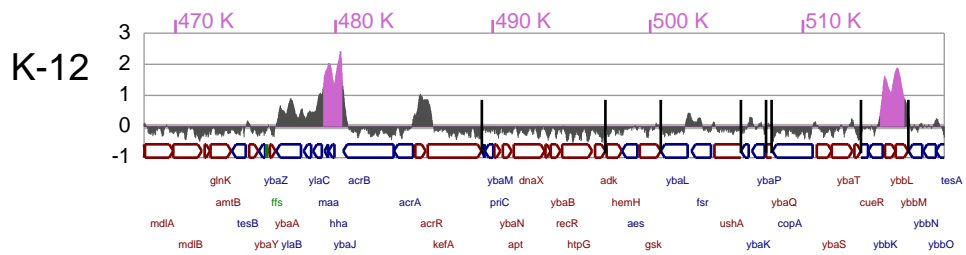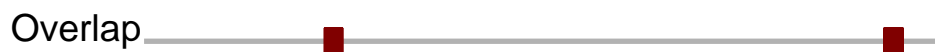

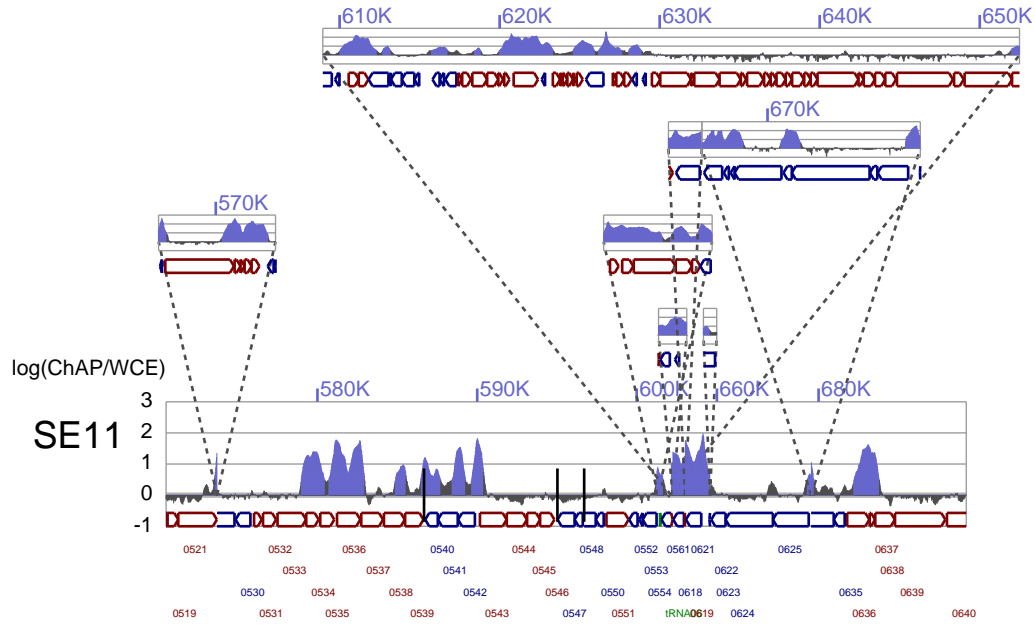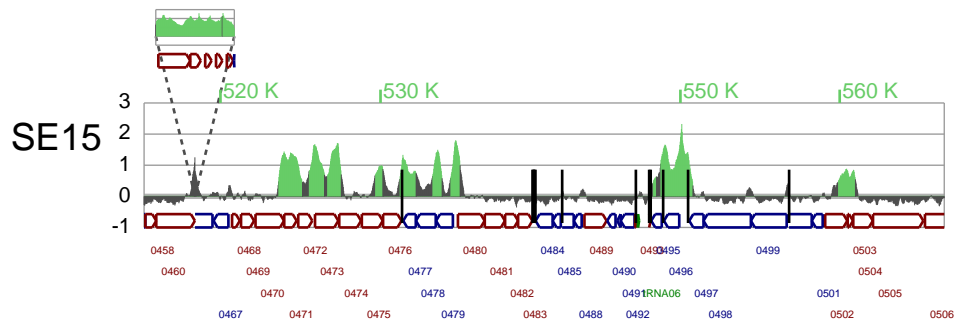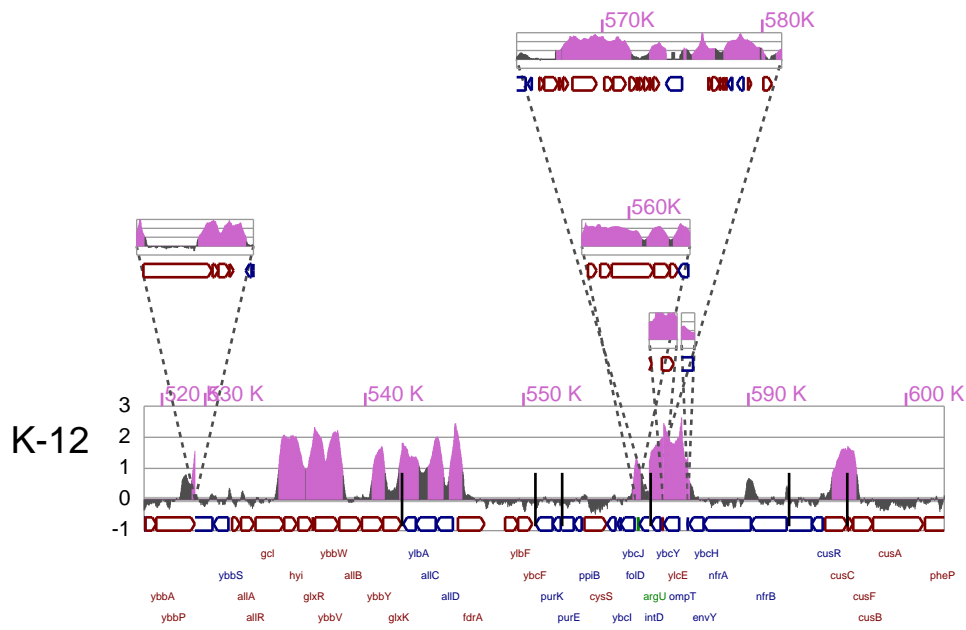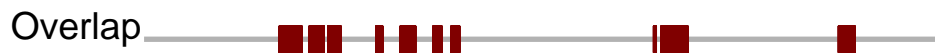

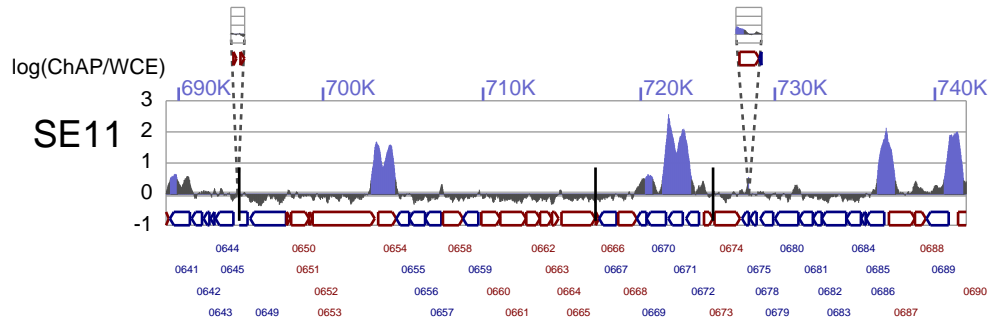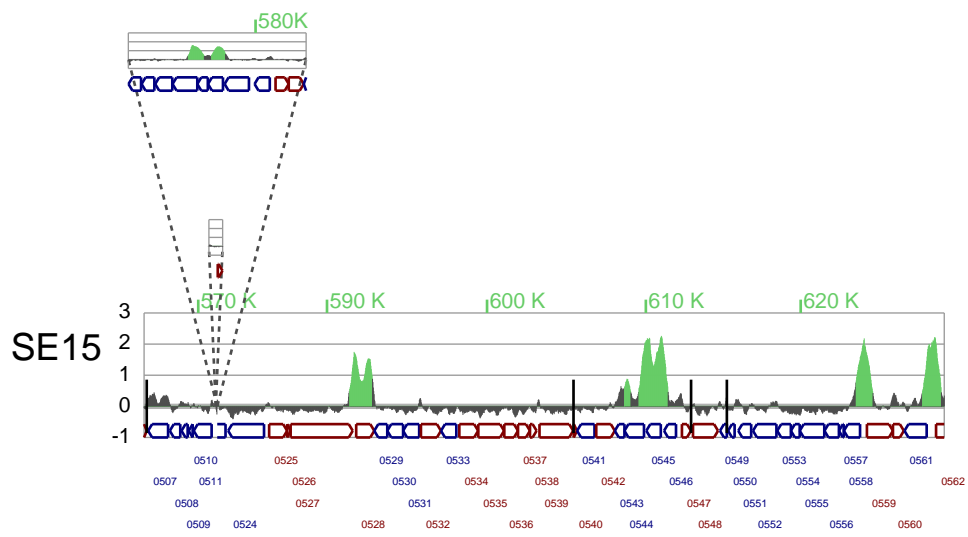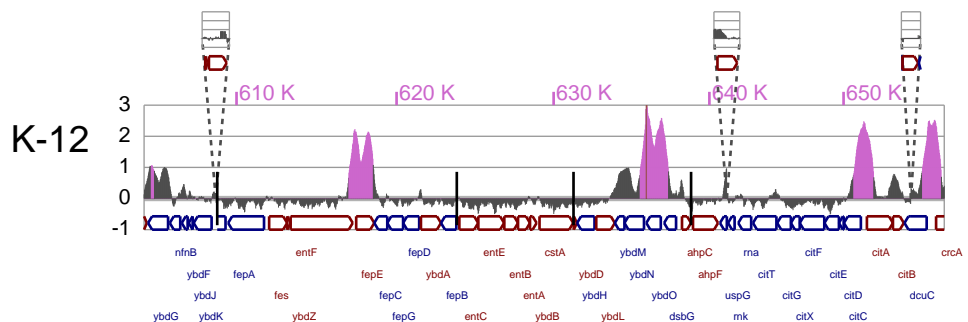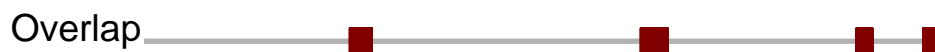

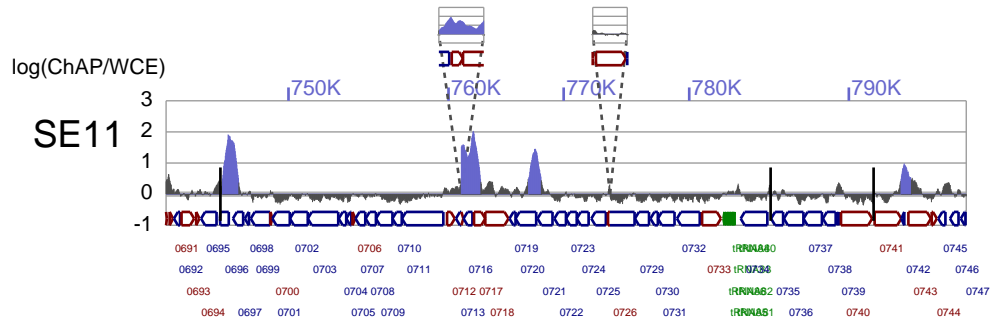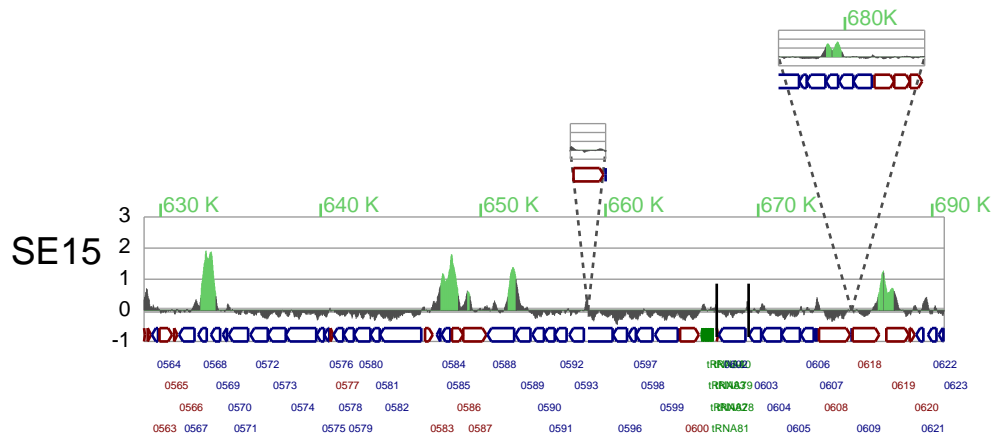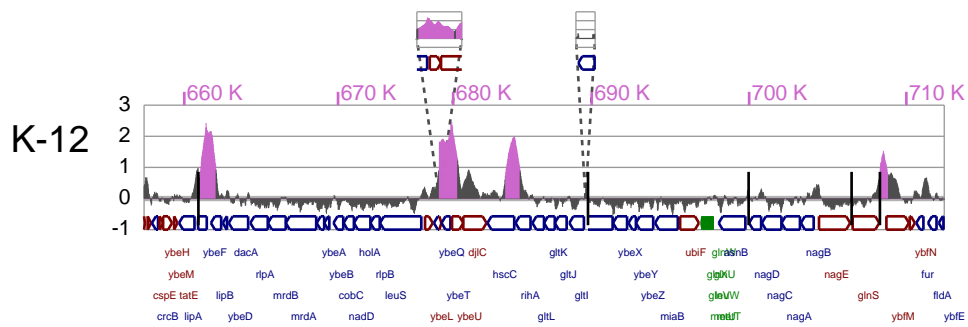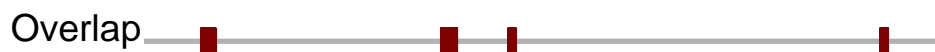

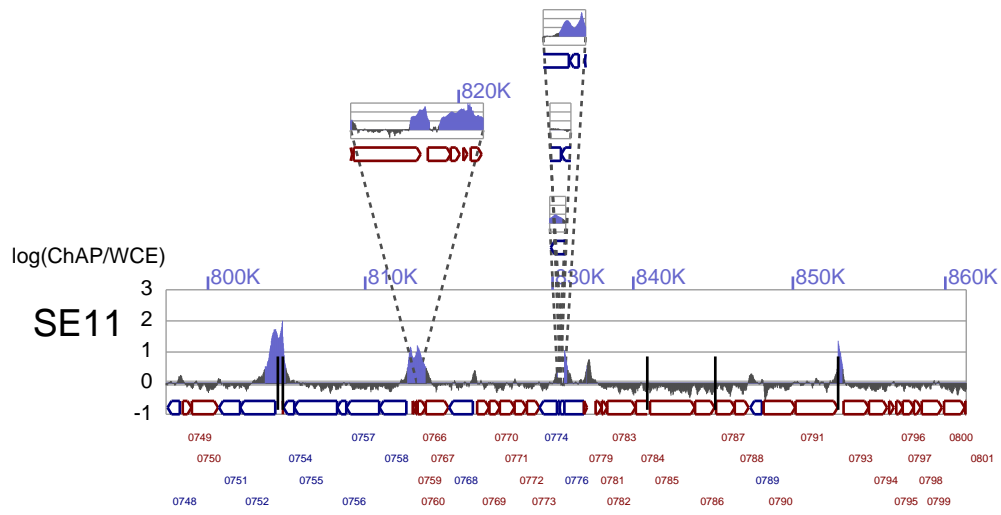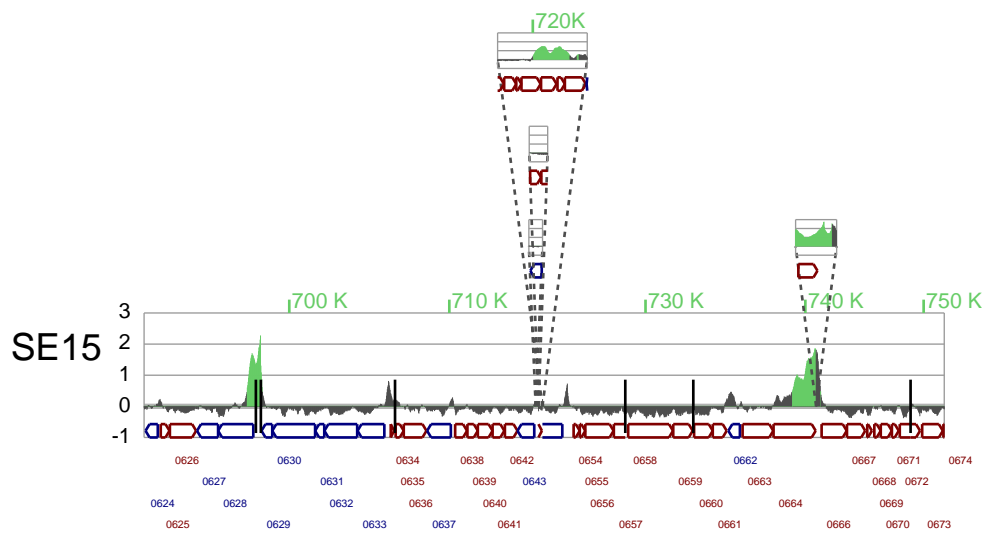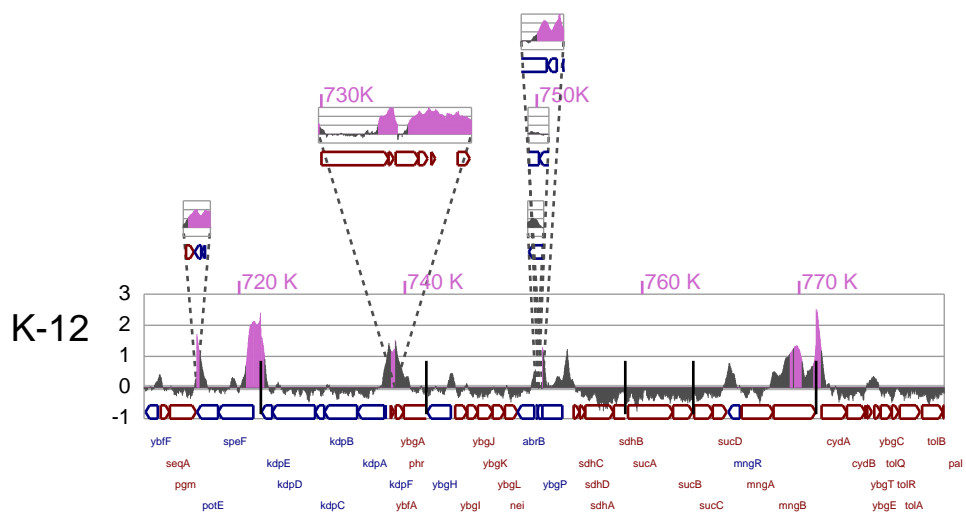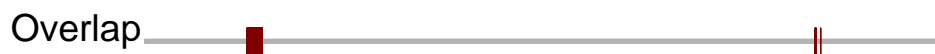

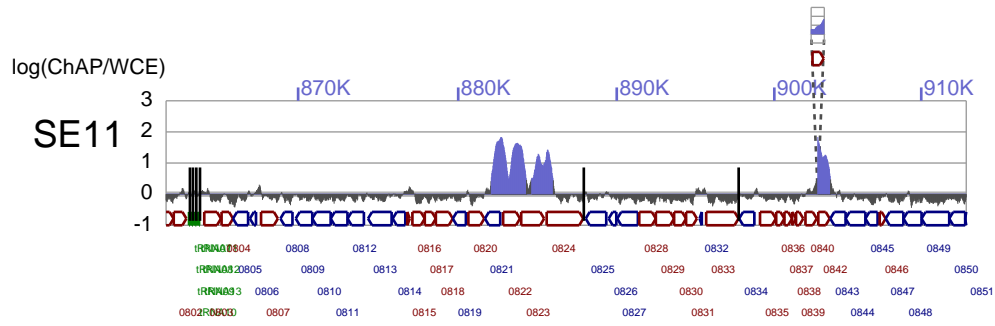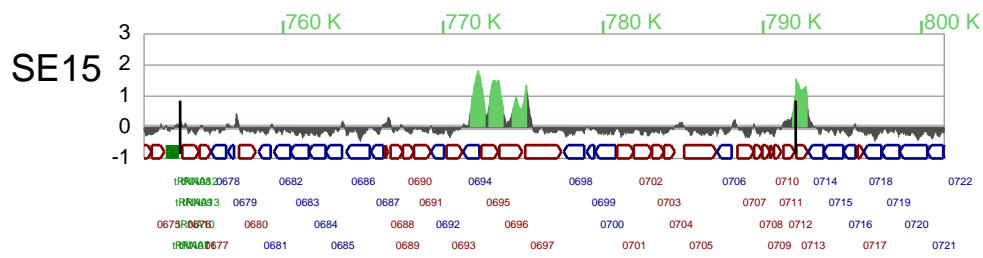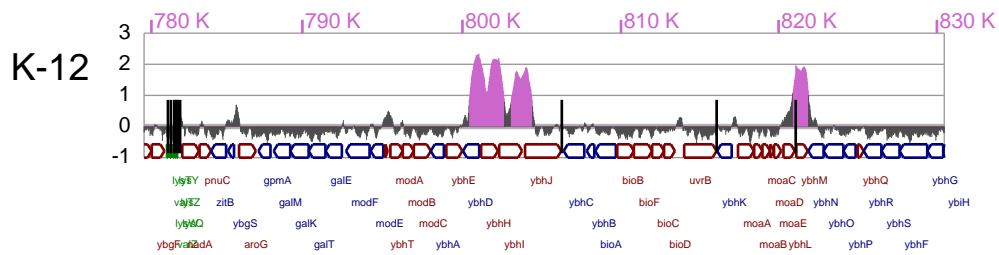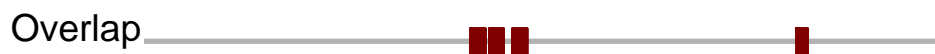

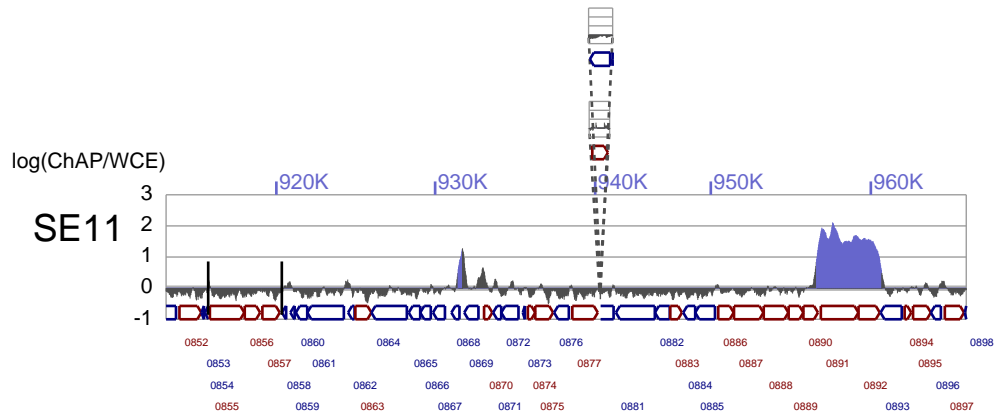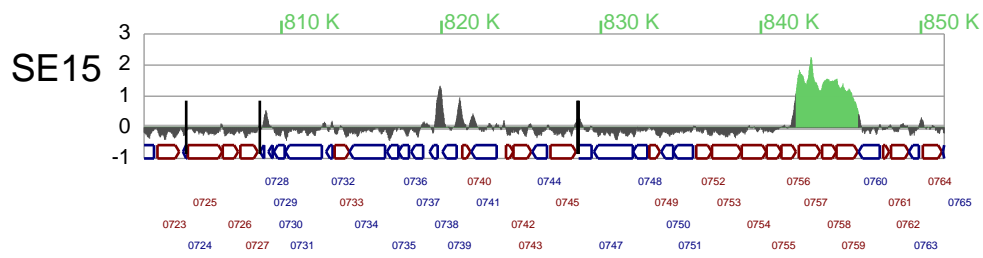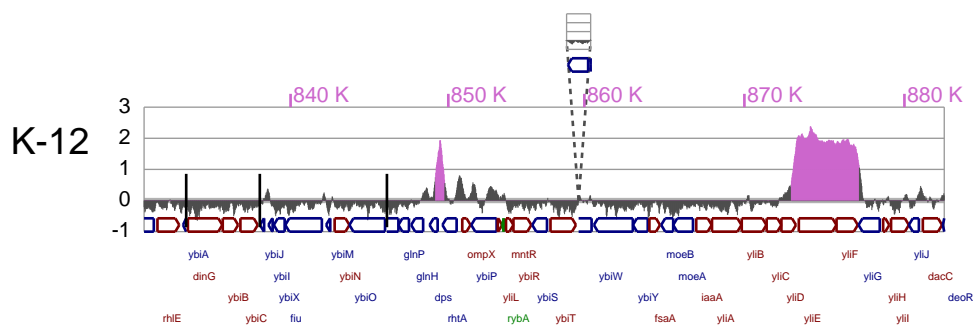

Overlap

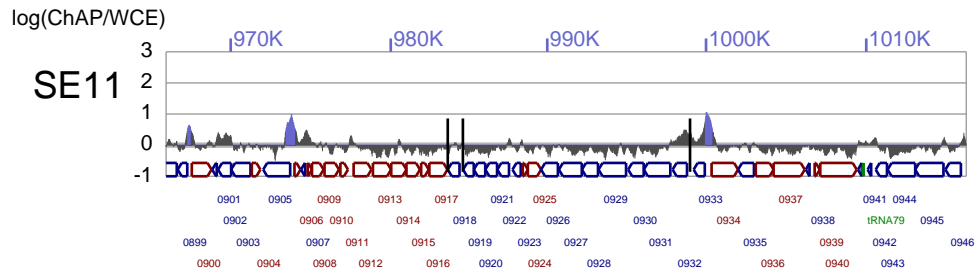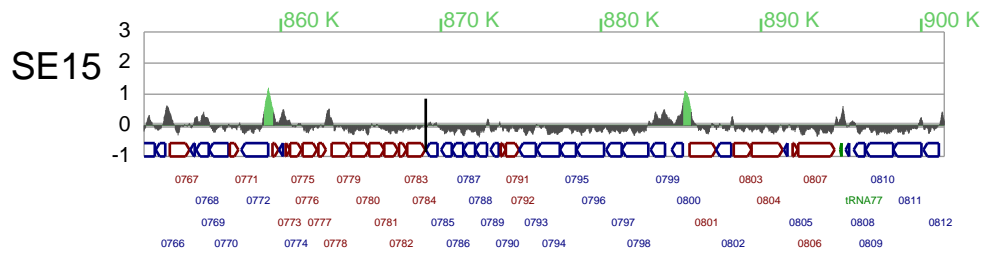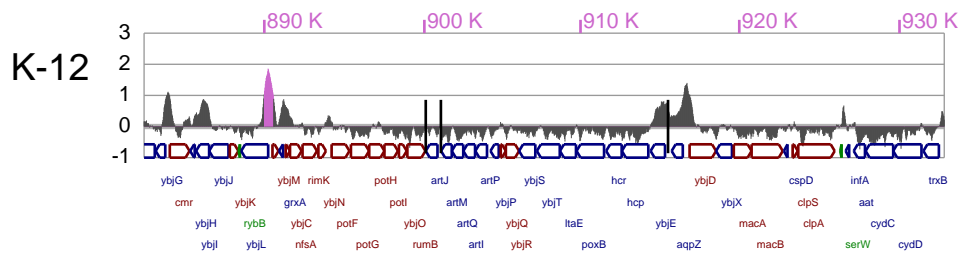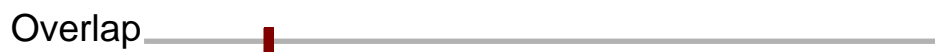



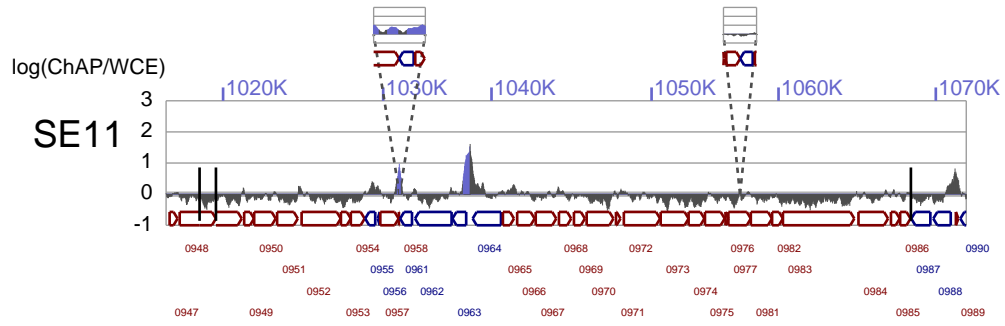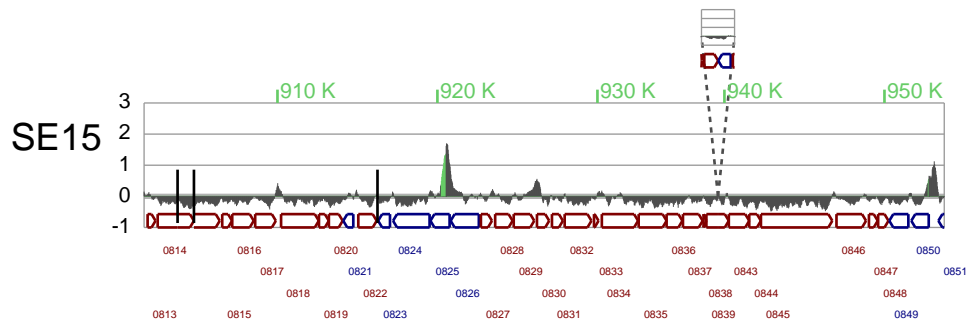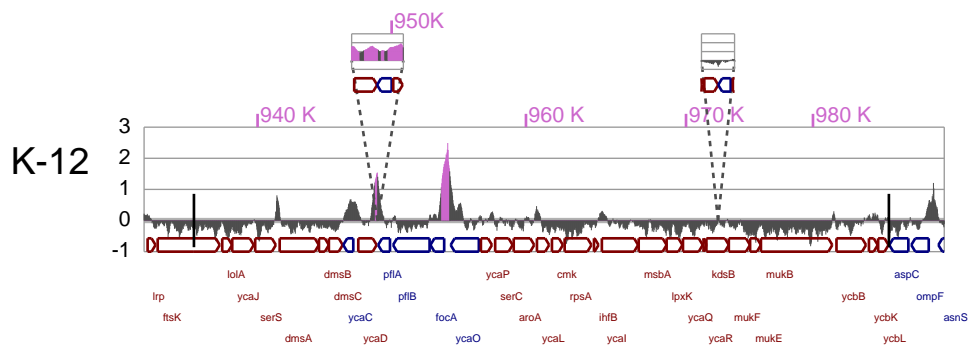

Overlap

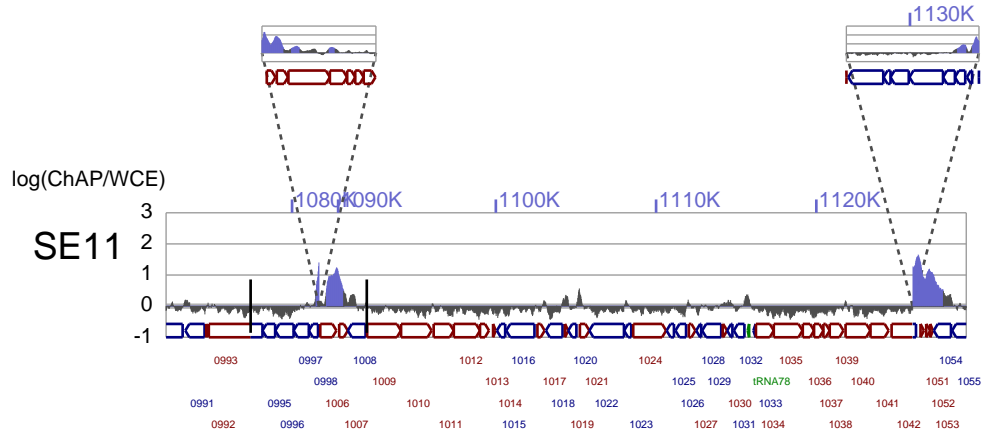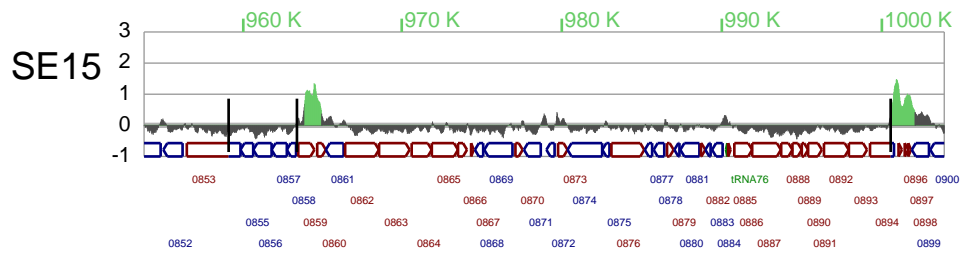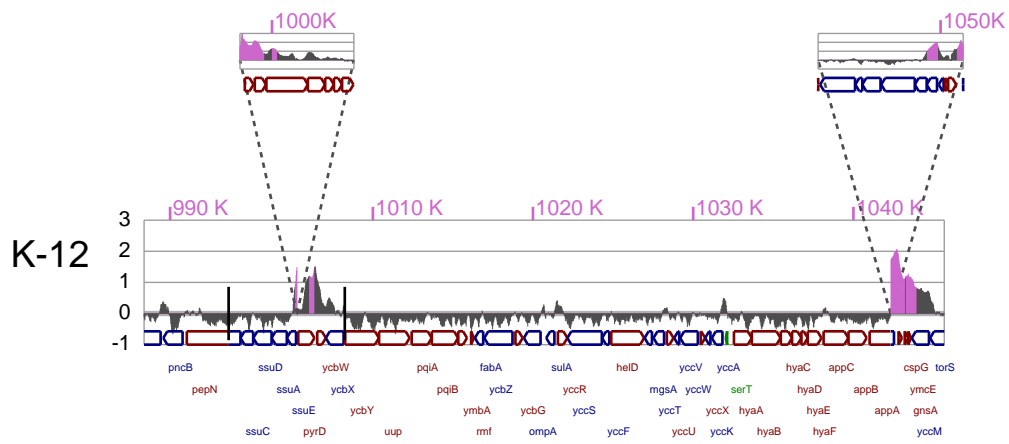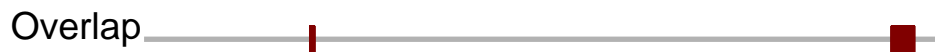

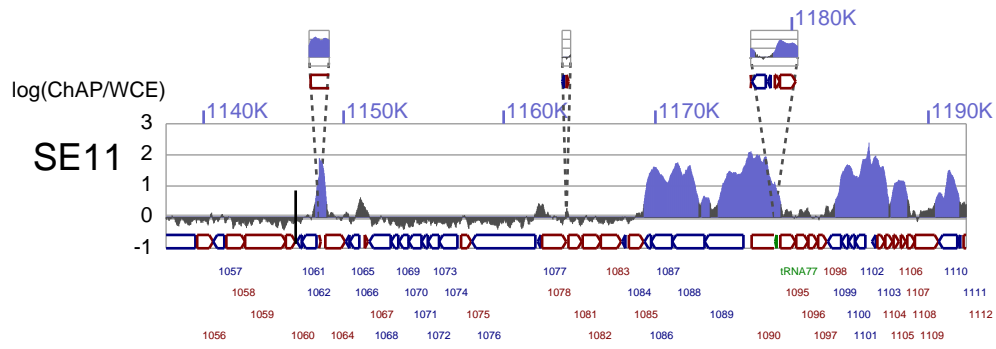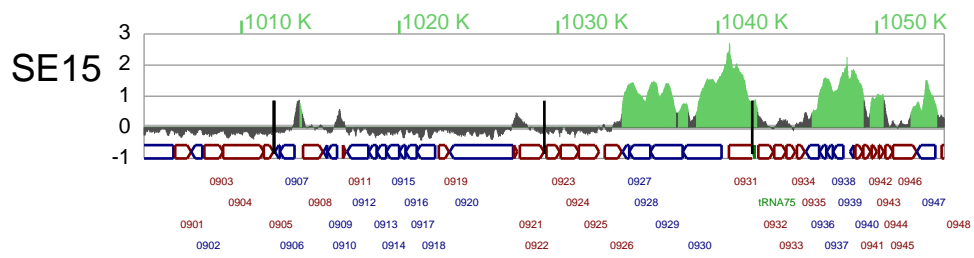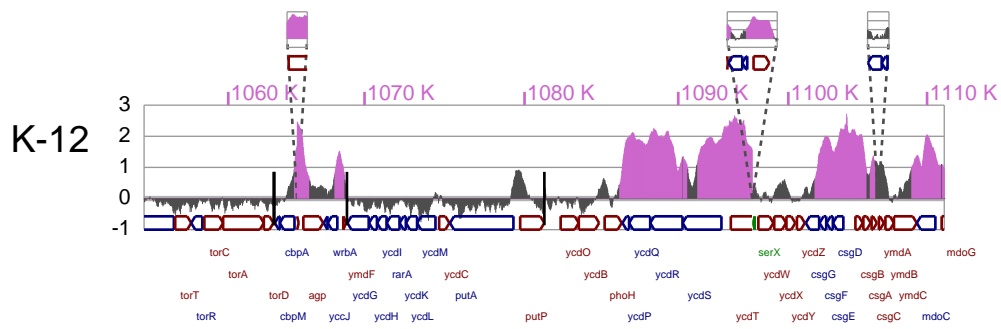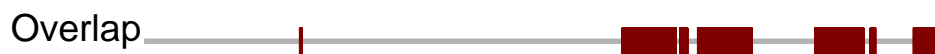

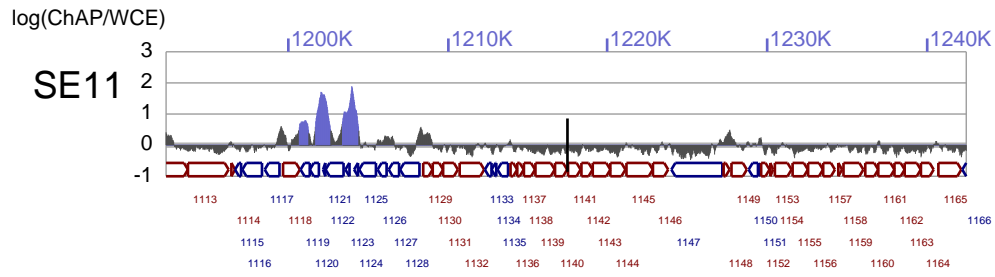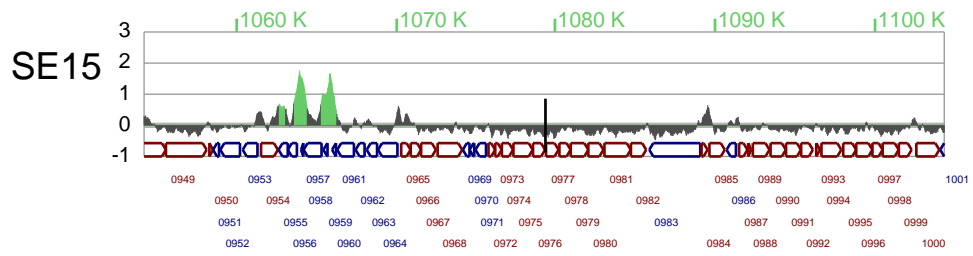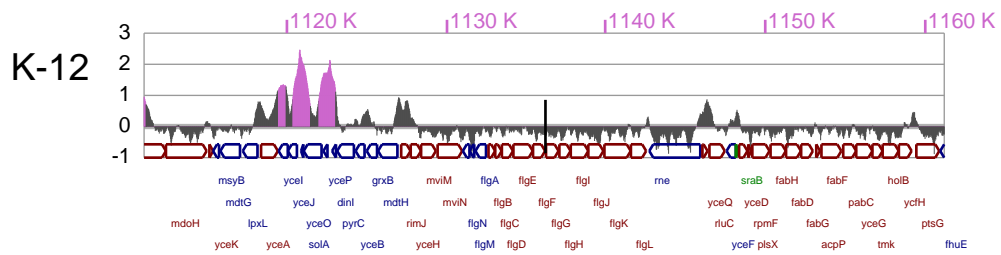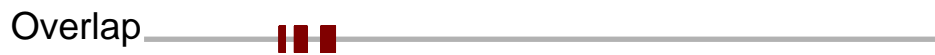

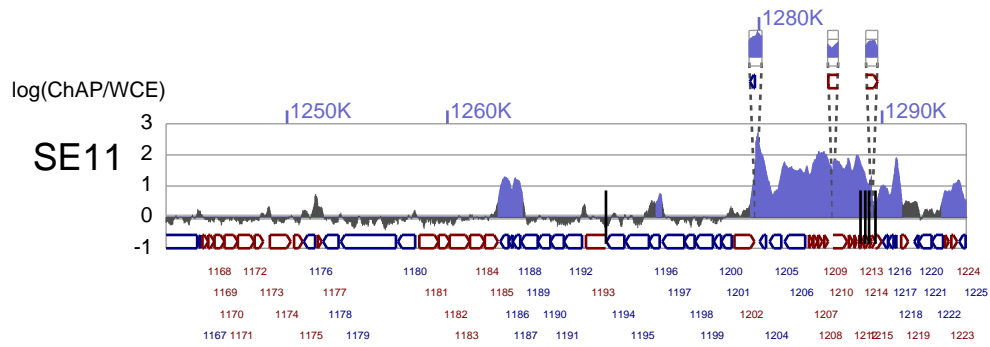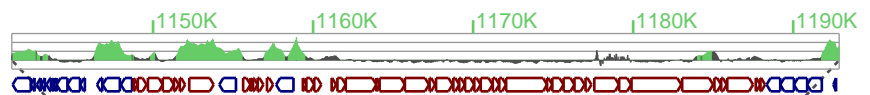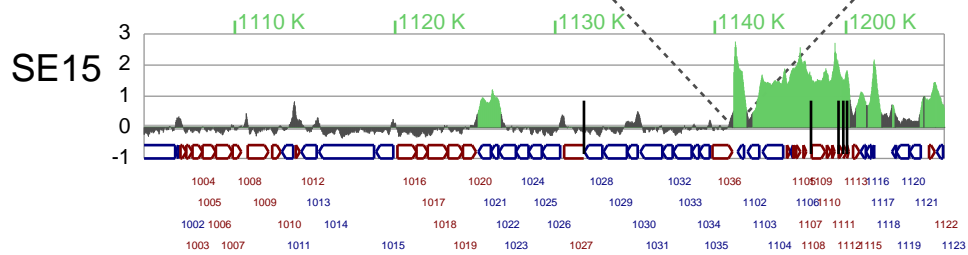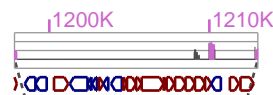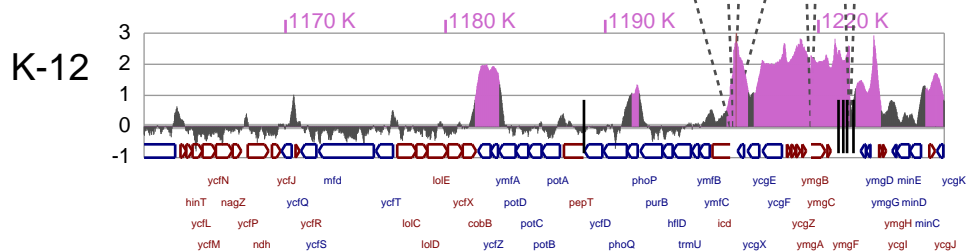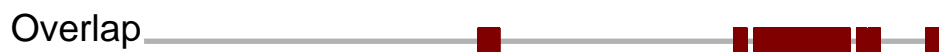

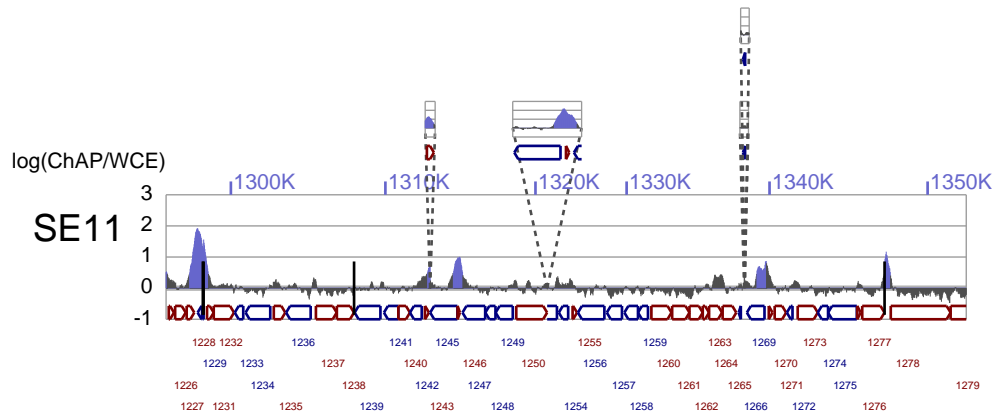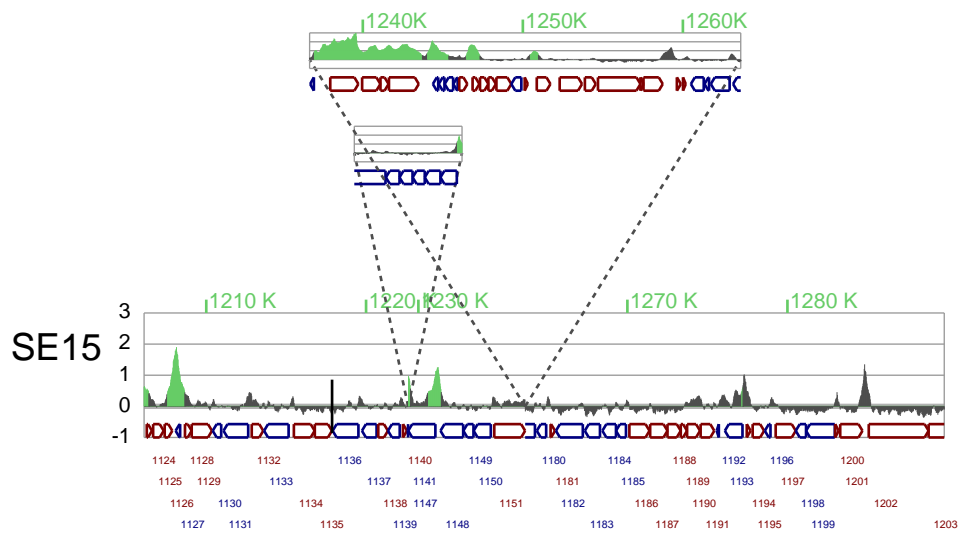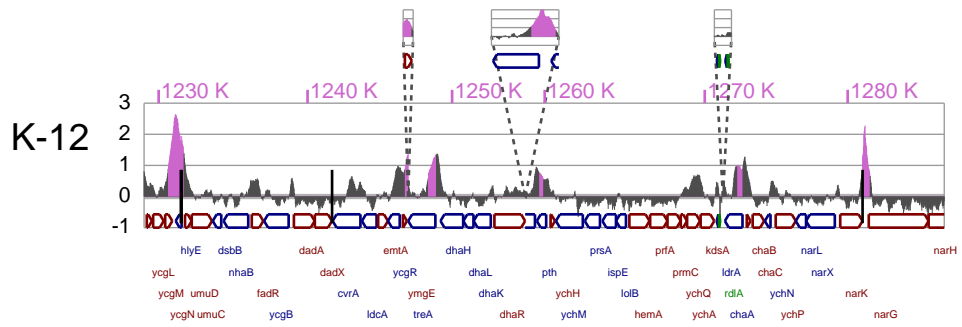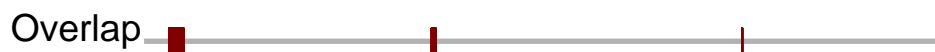

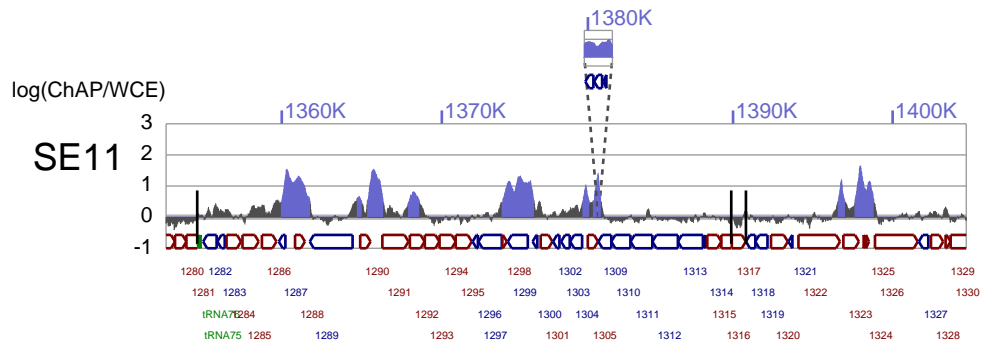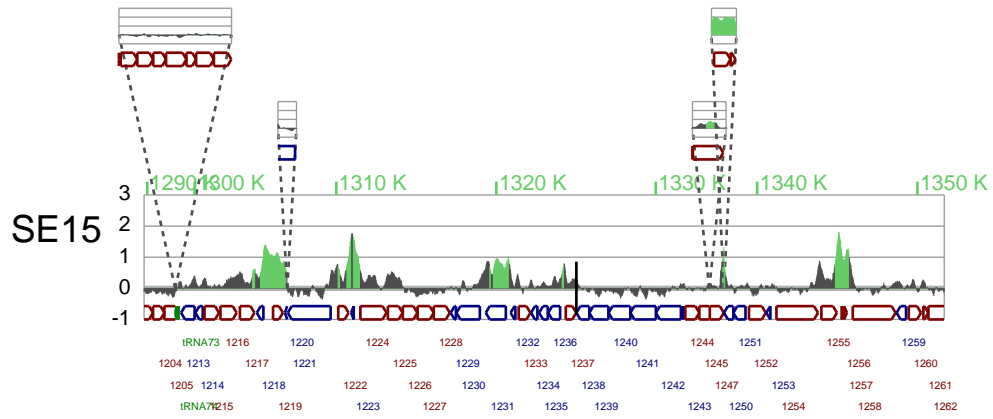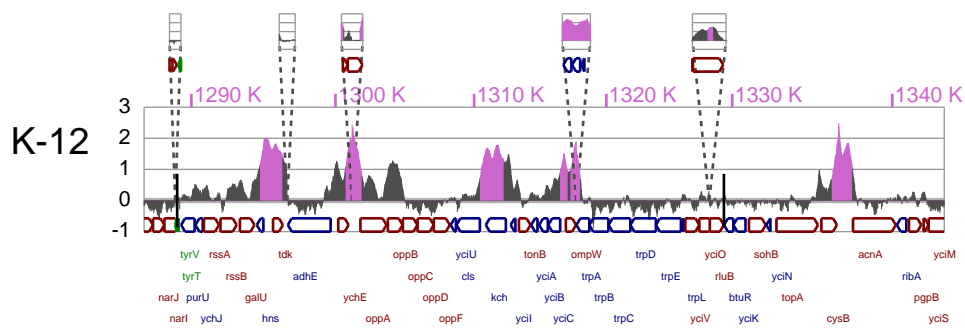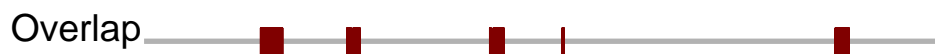

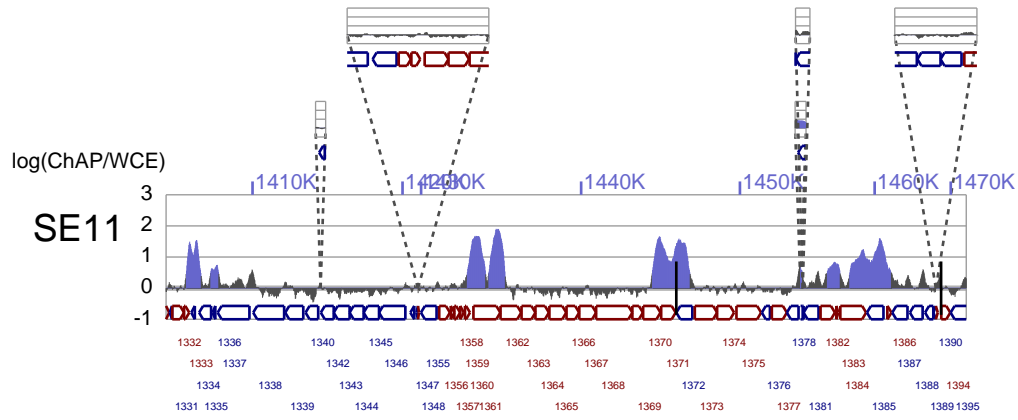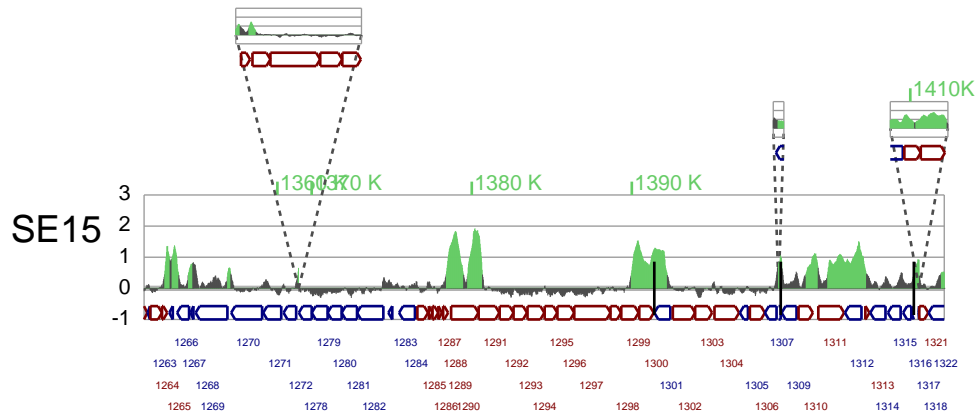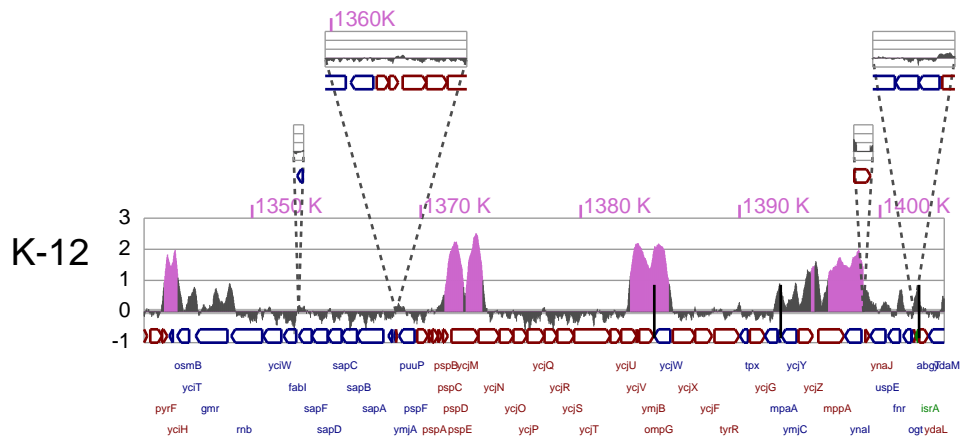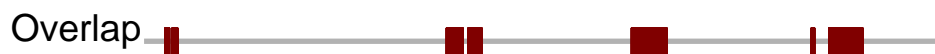



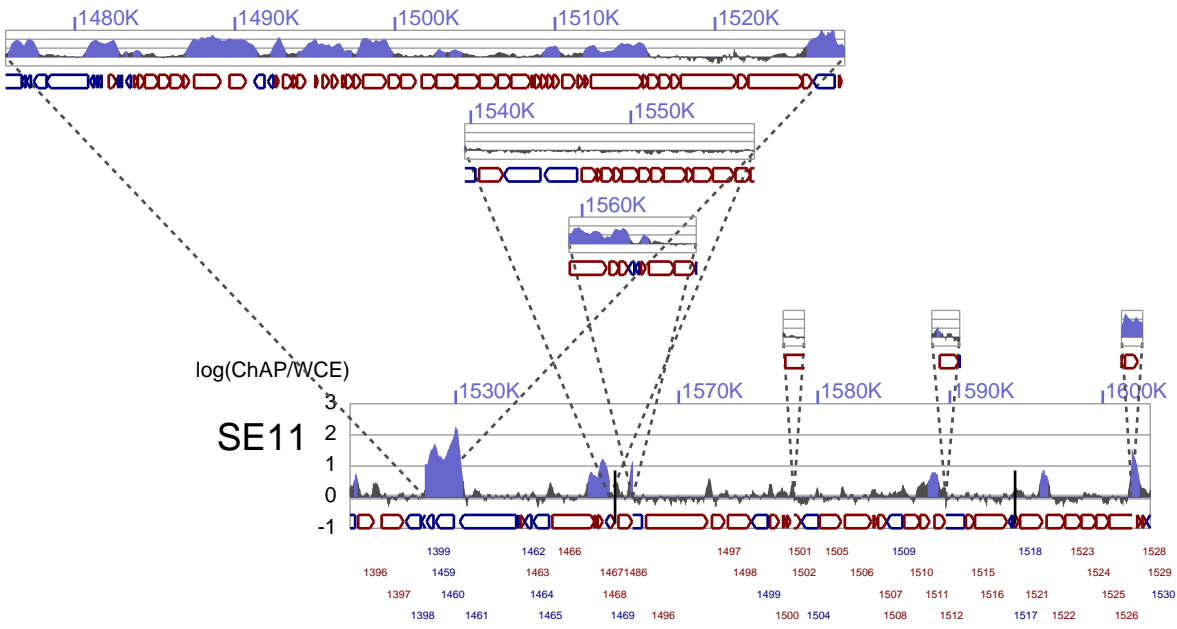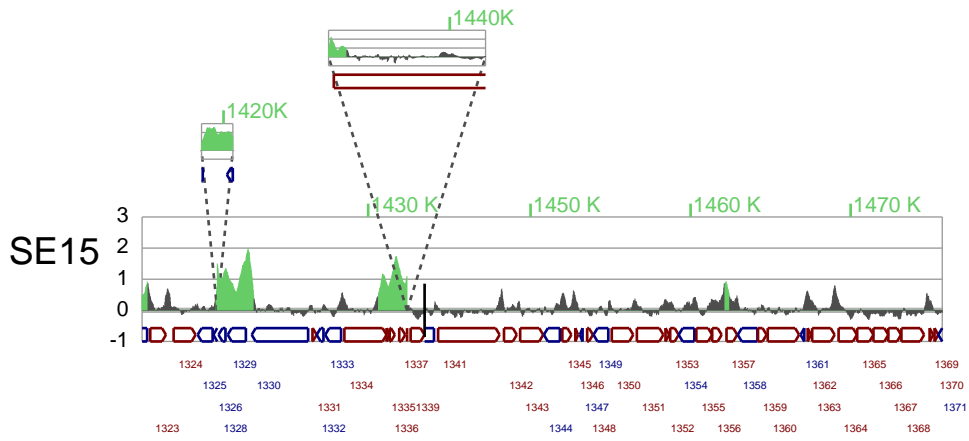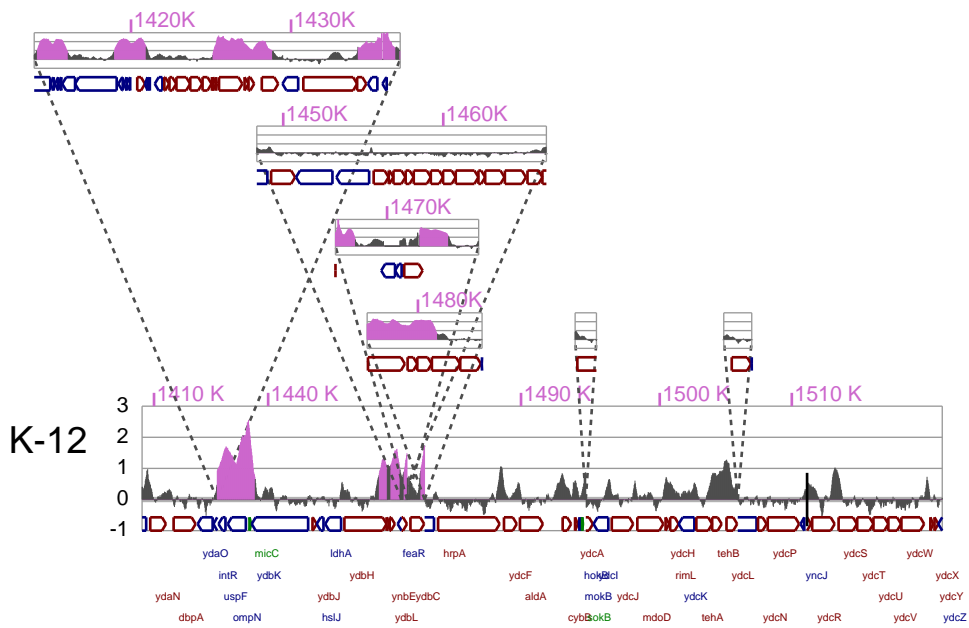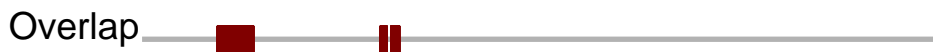

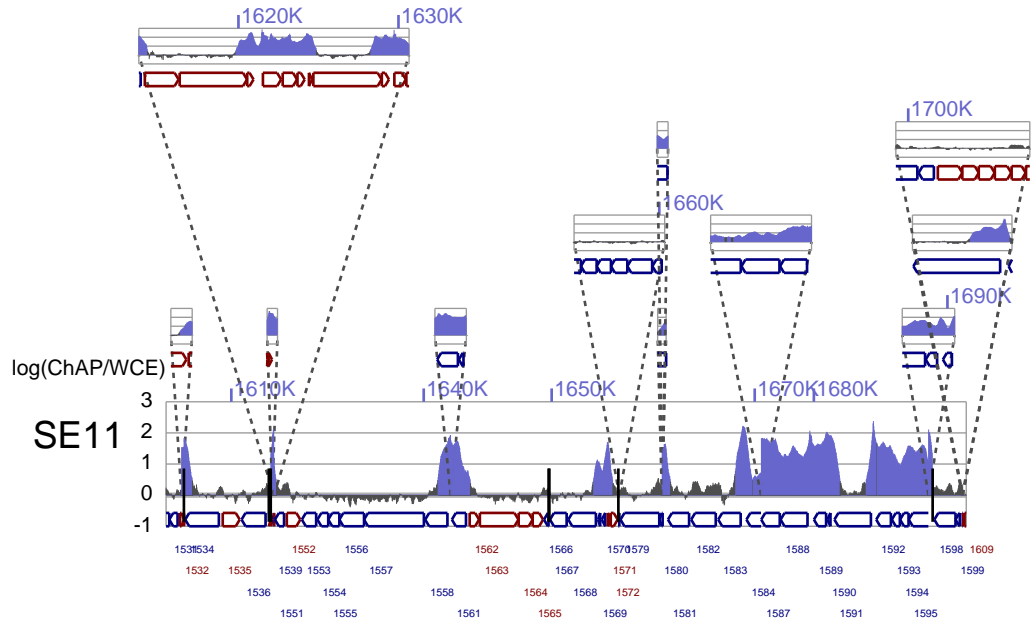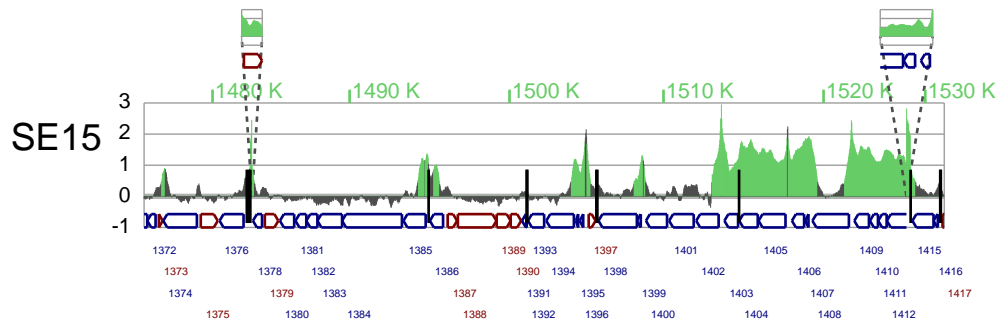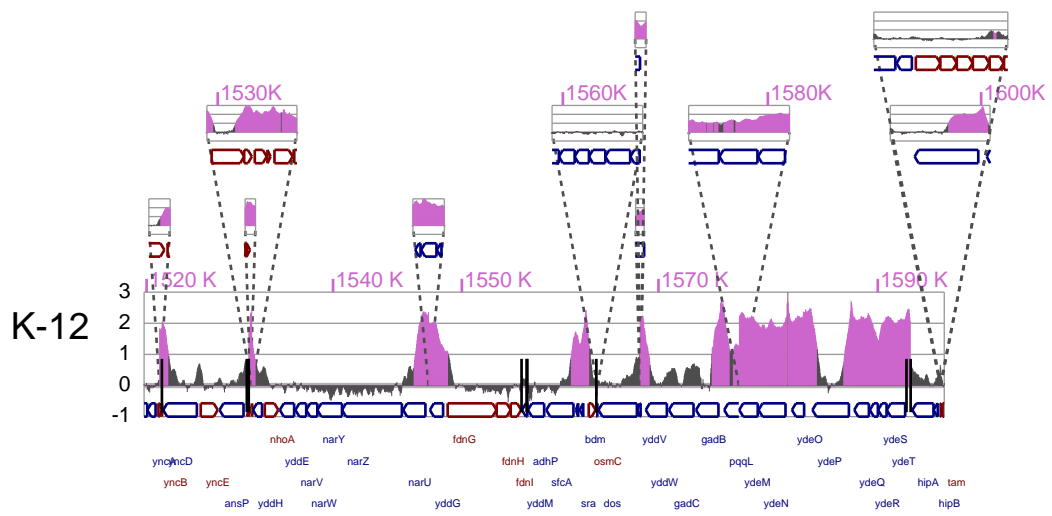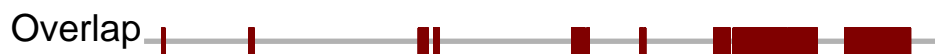

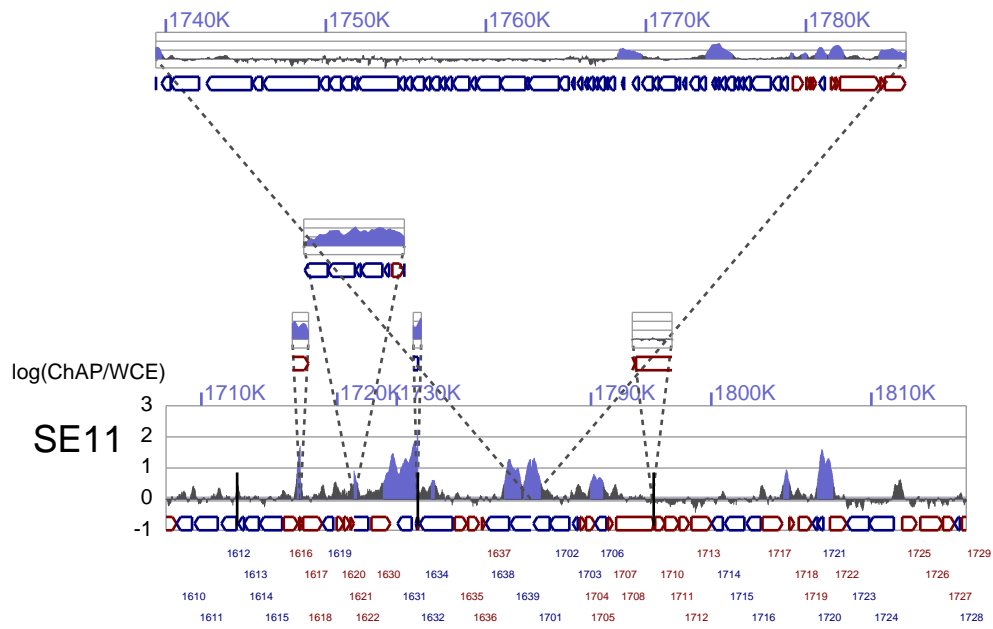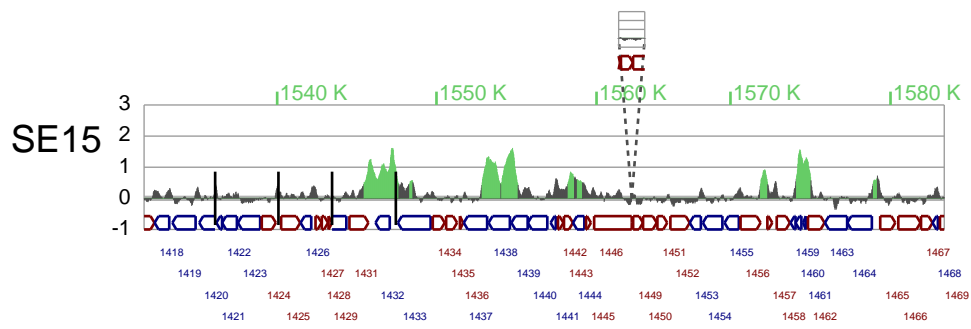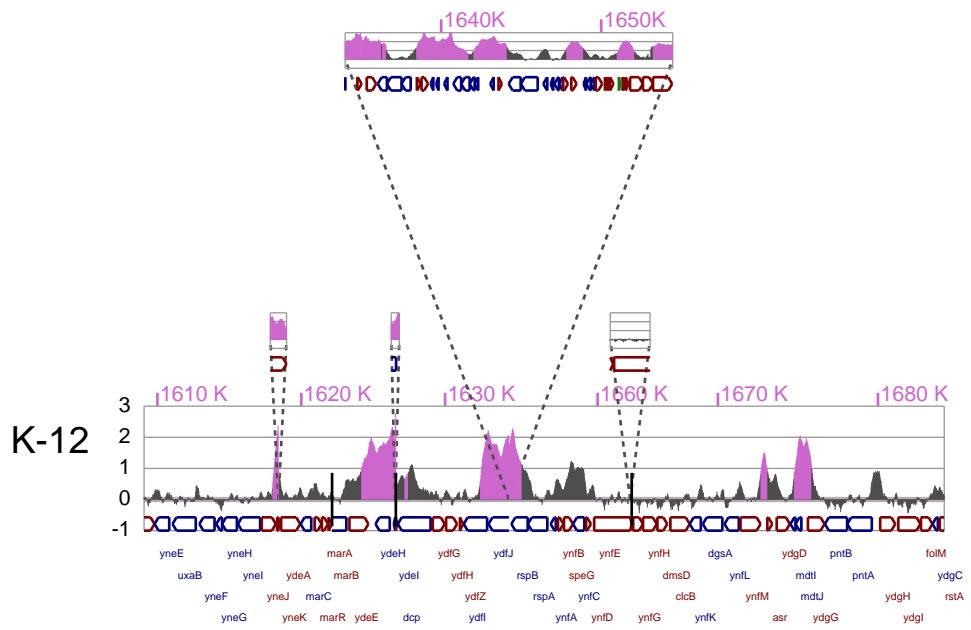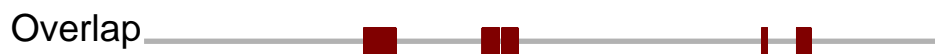

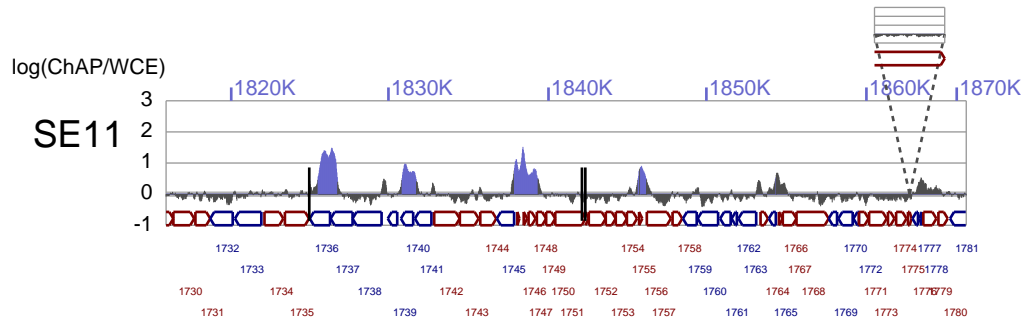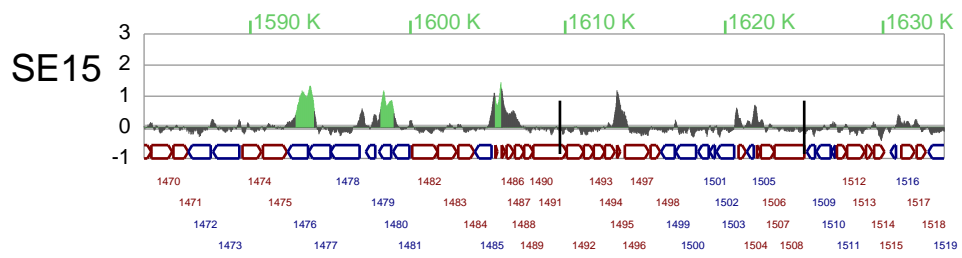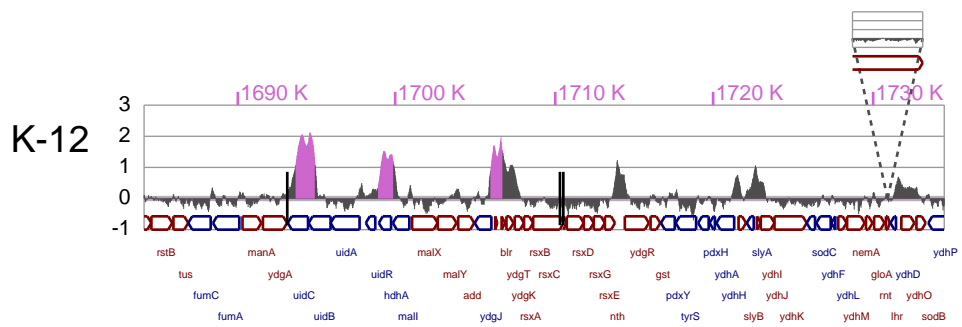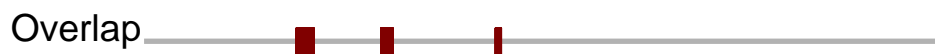

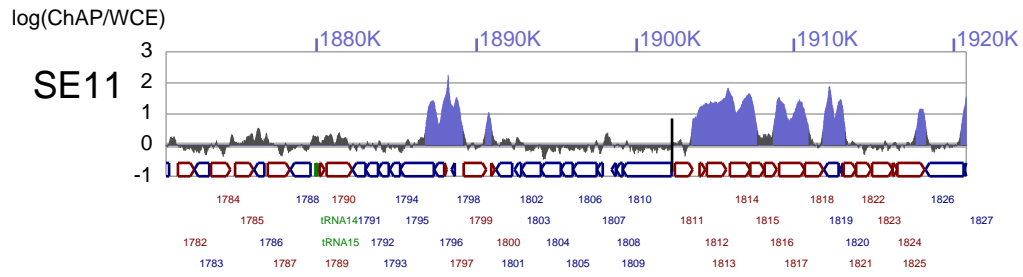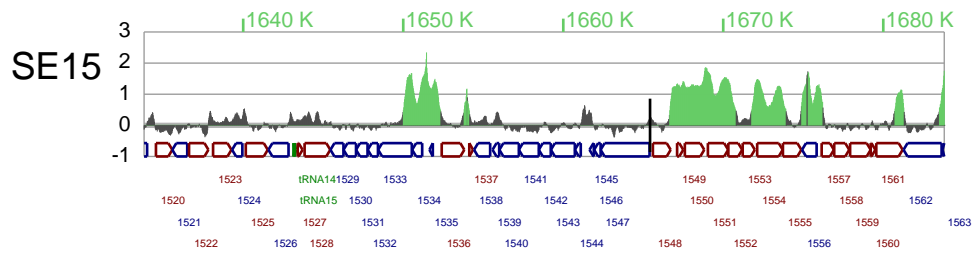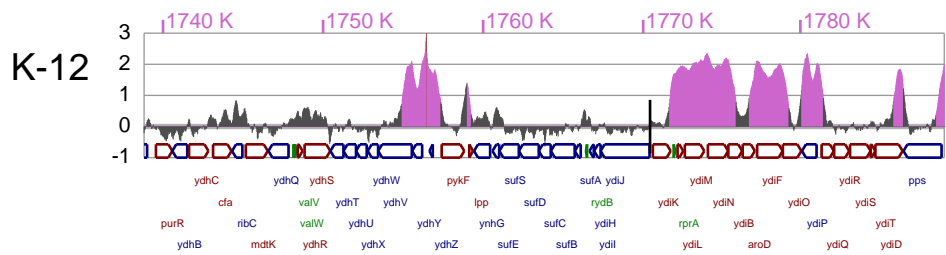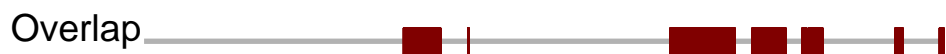

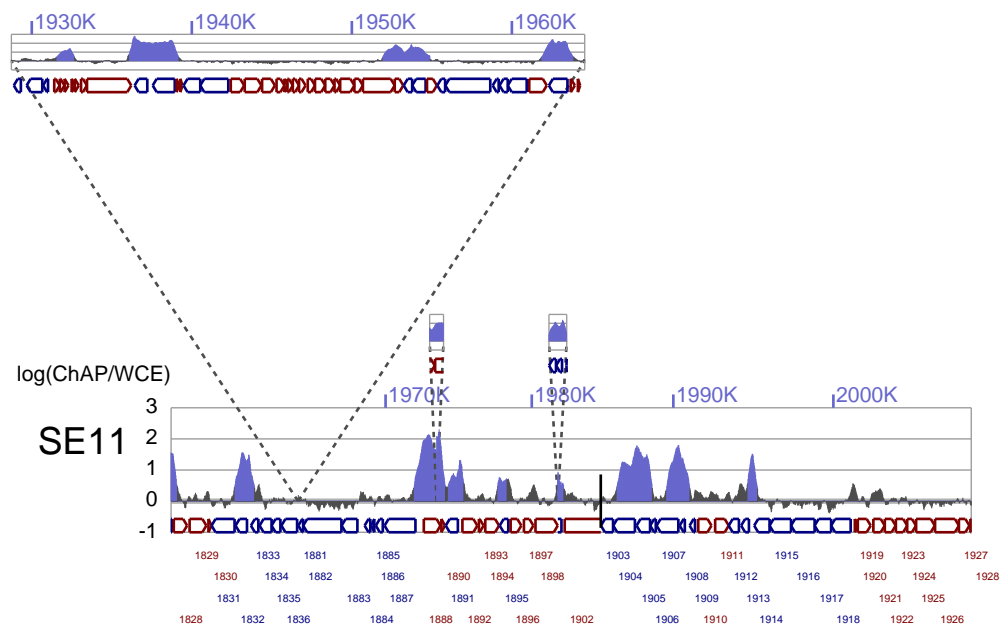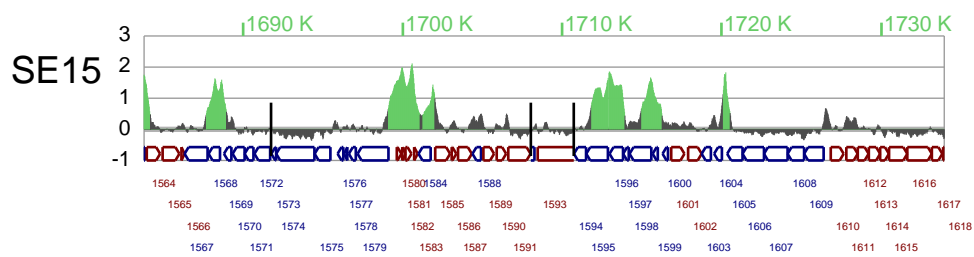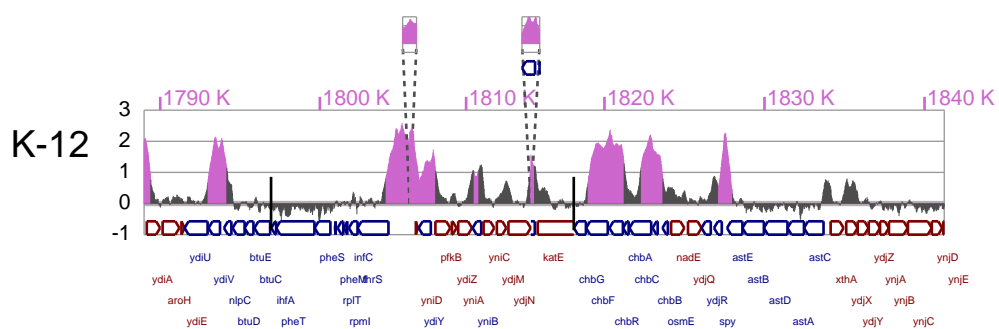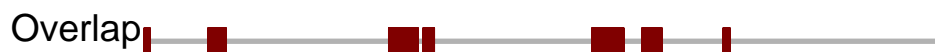

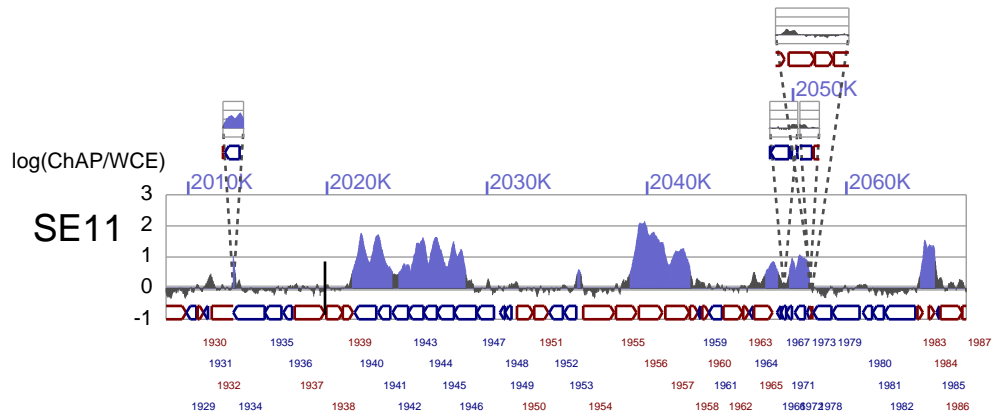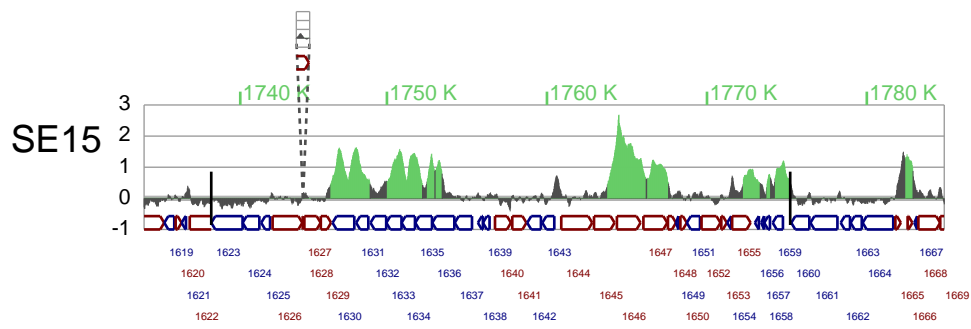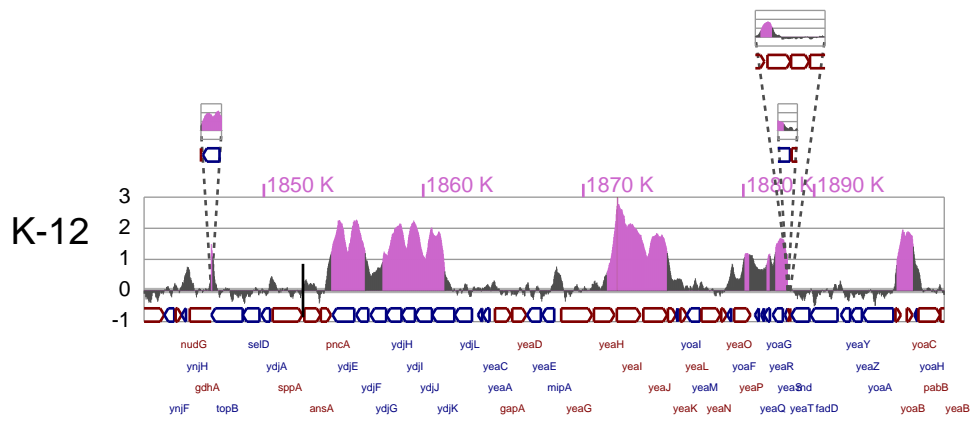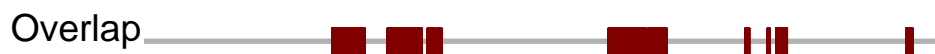

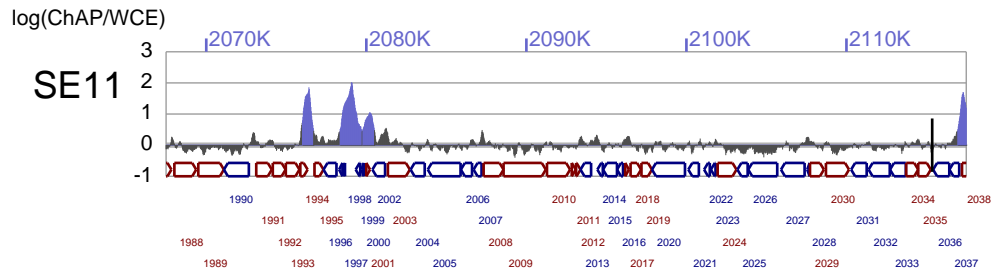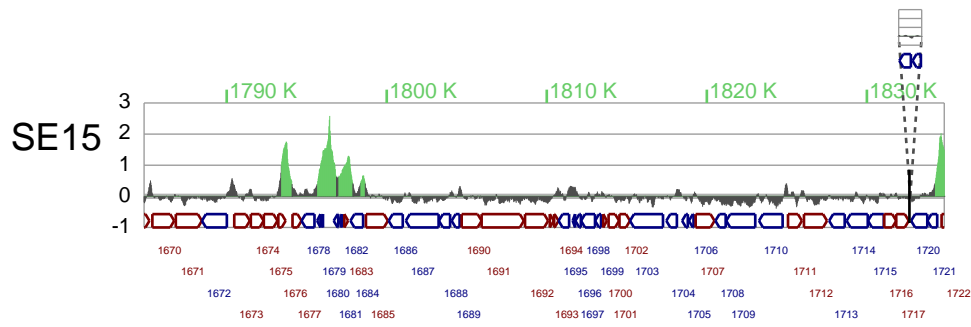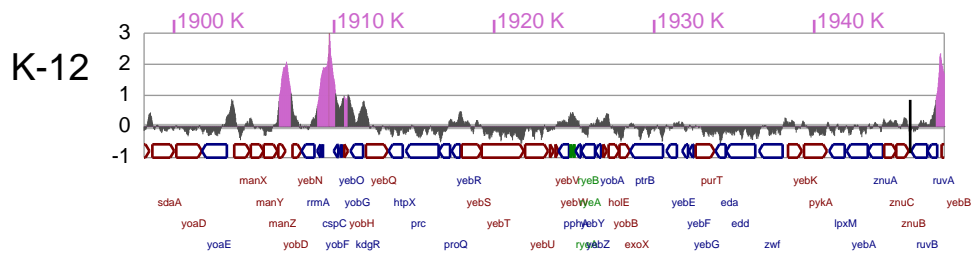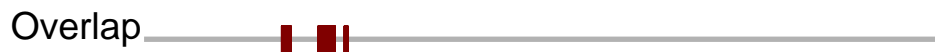



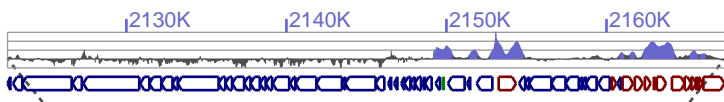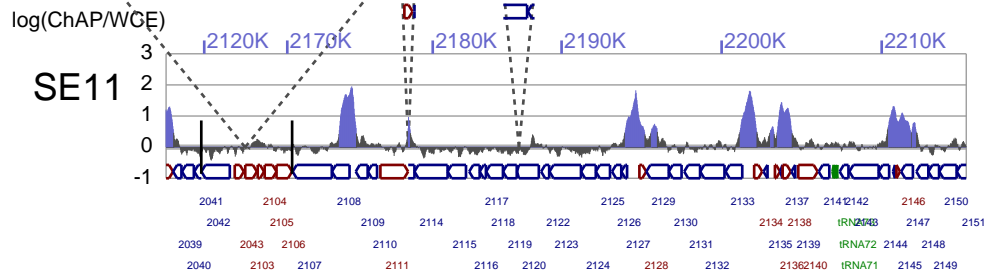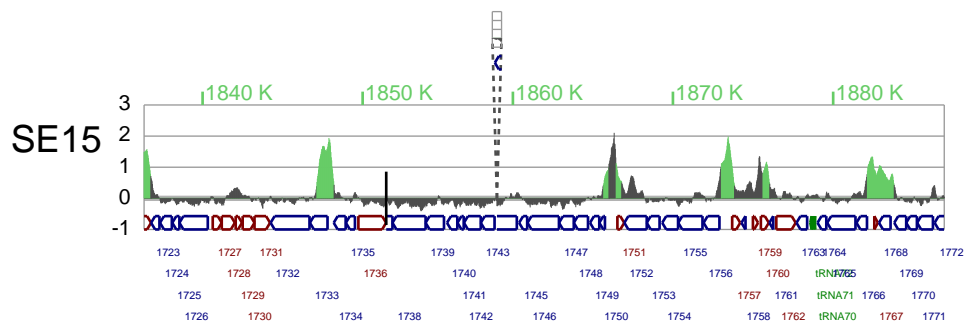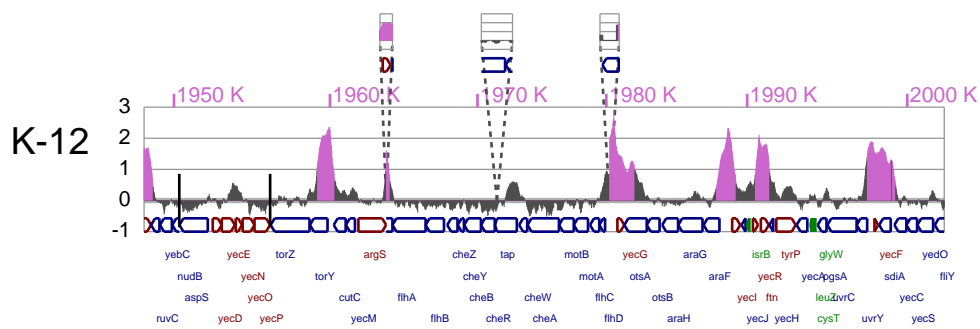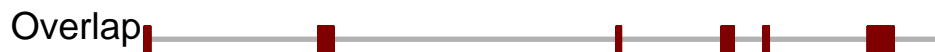

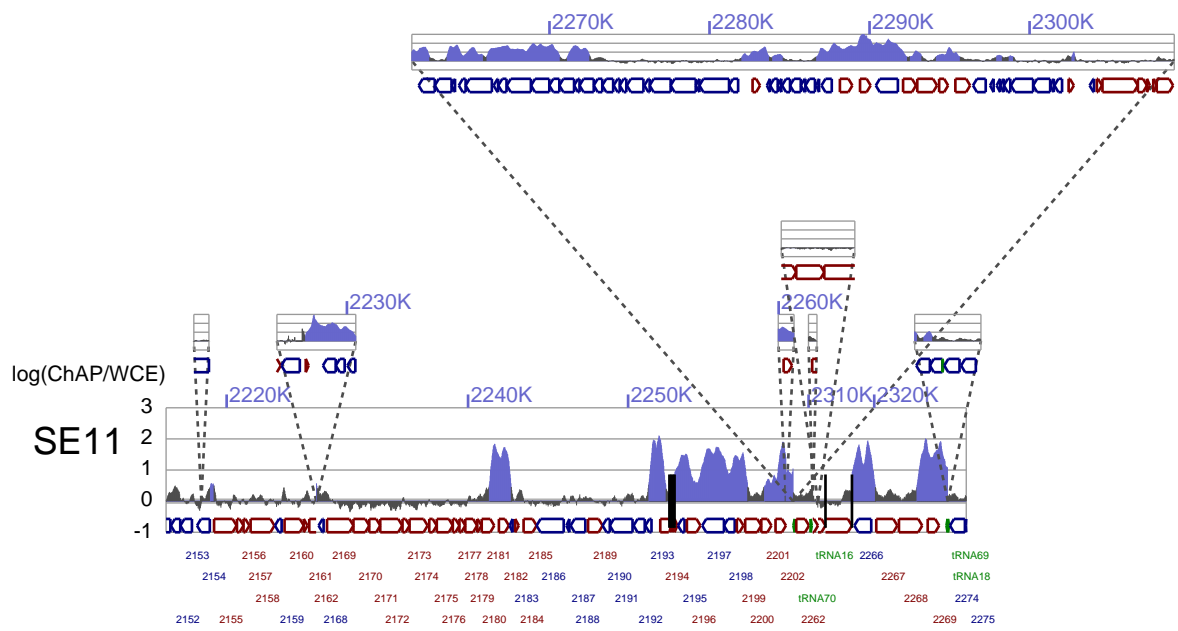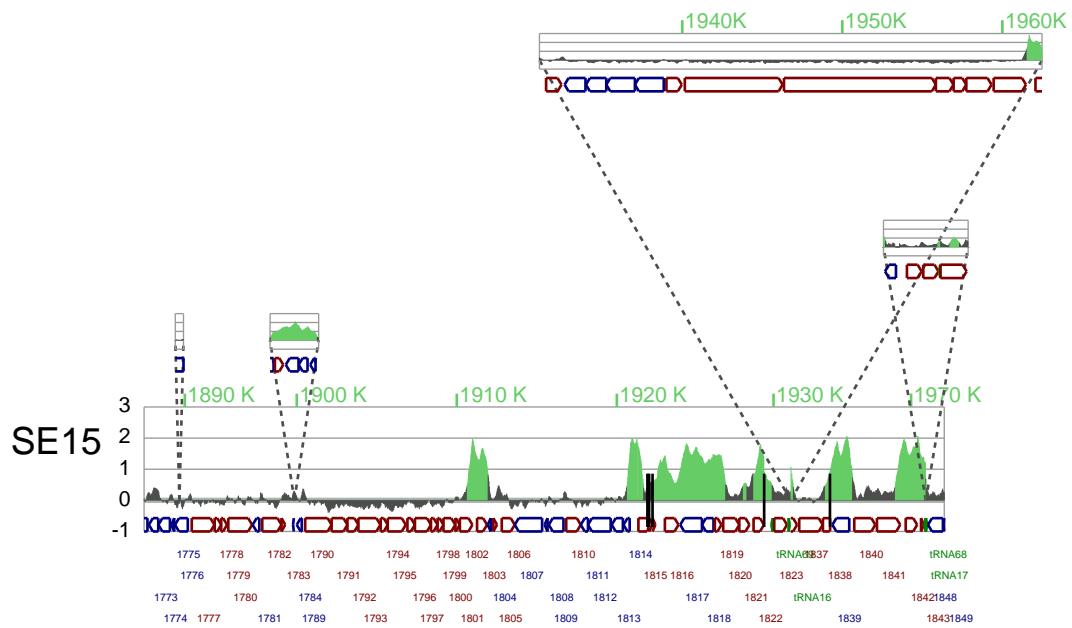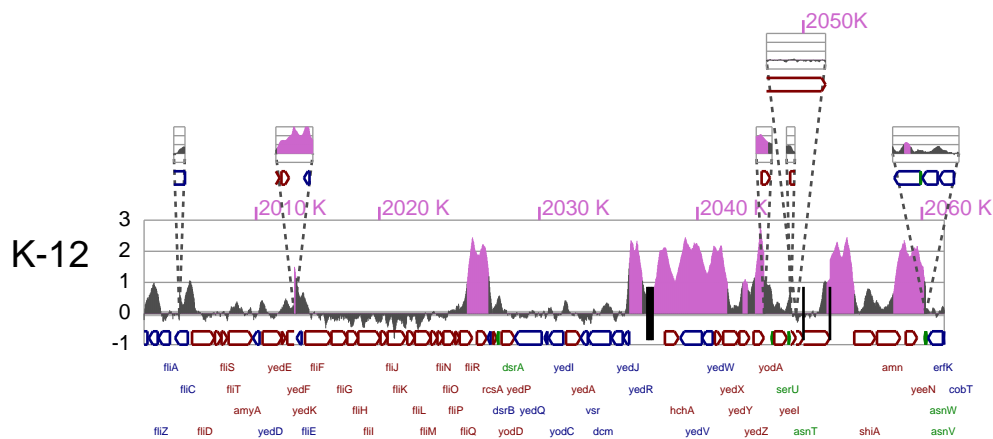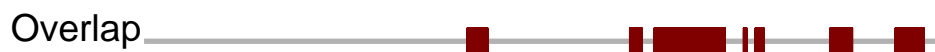

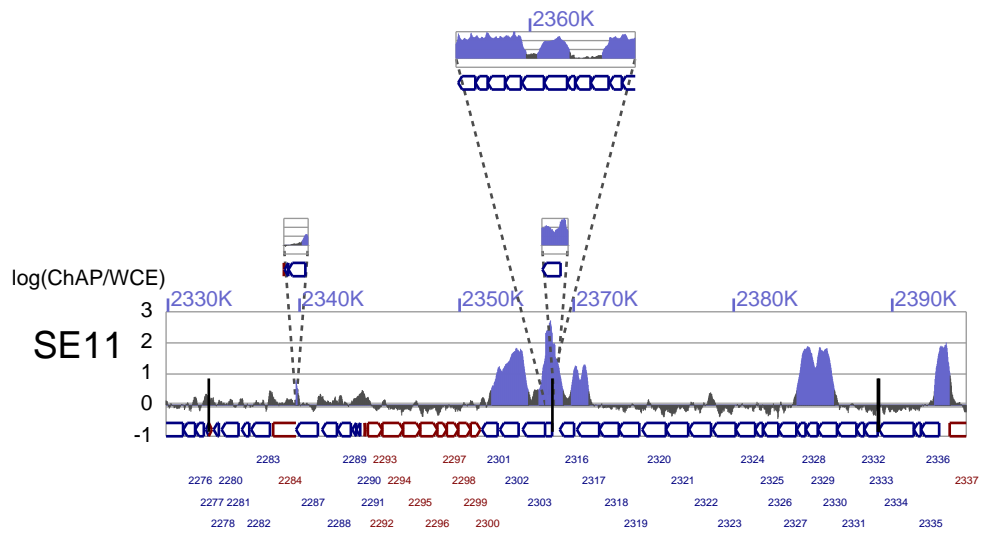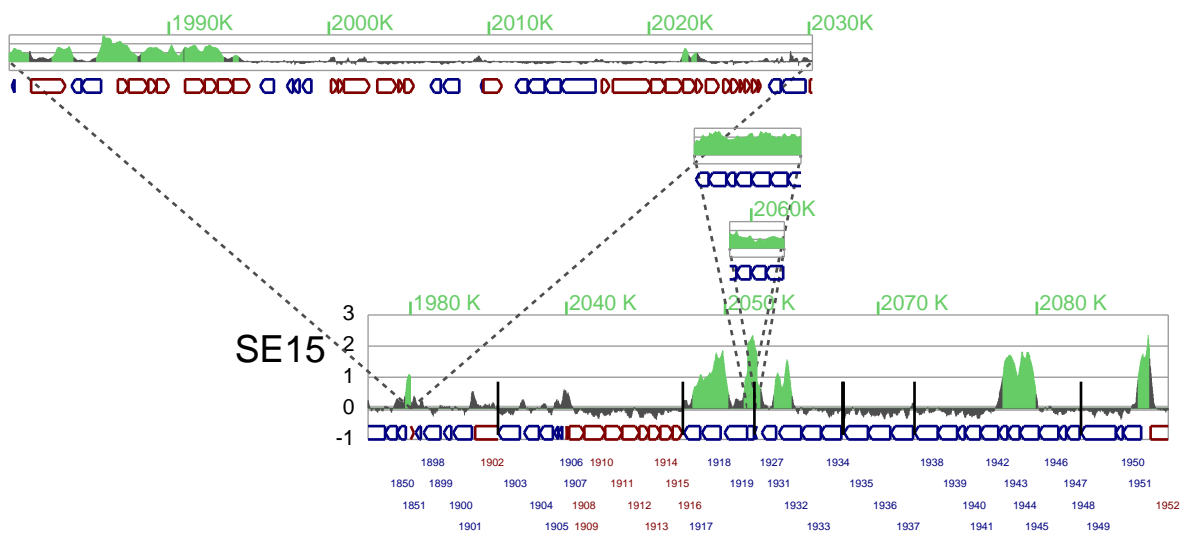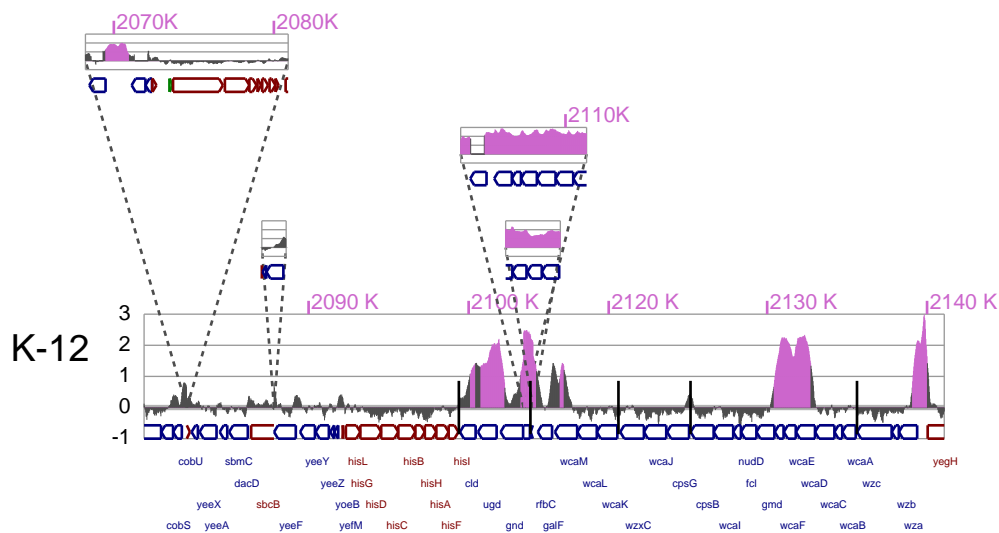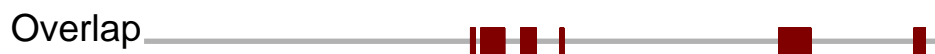

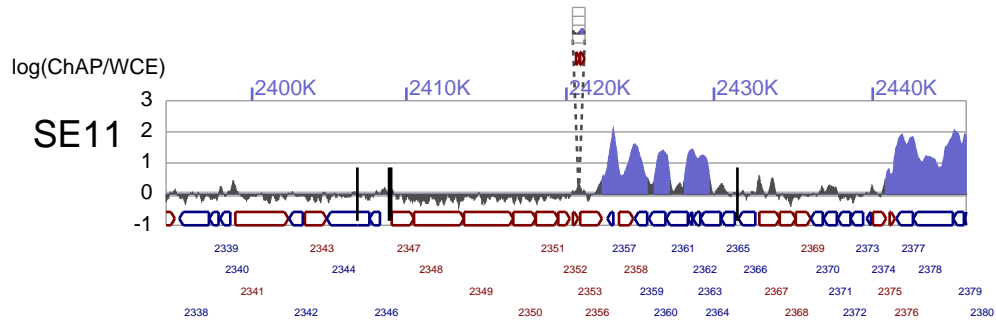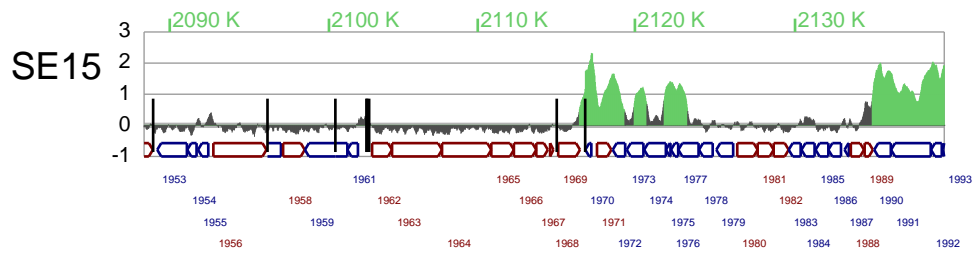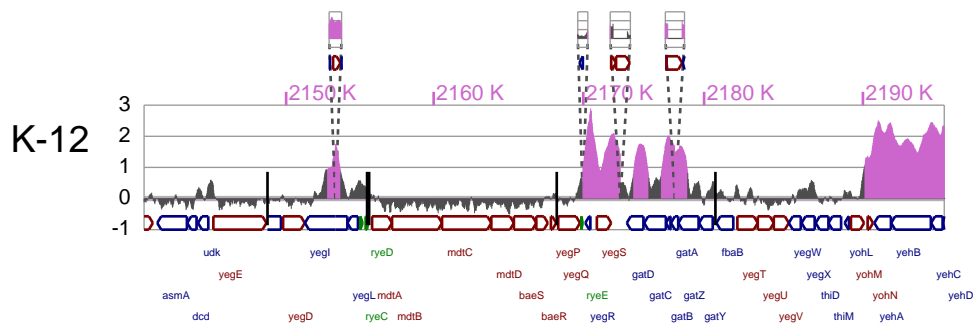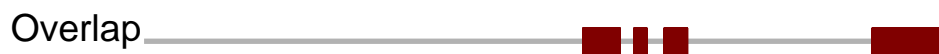

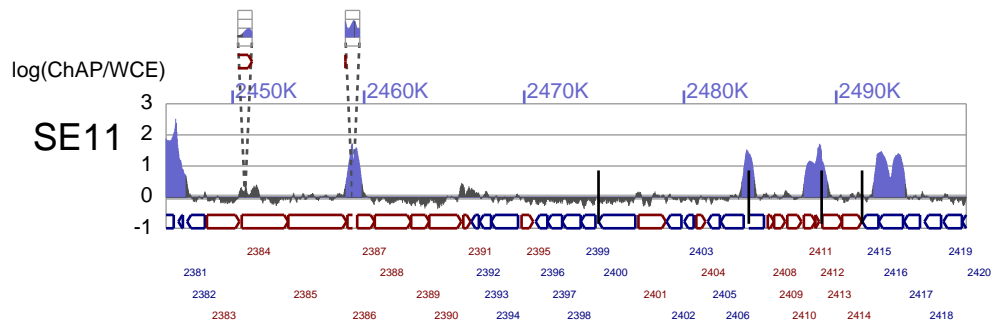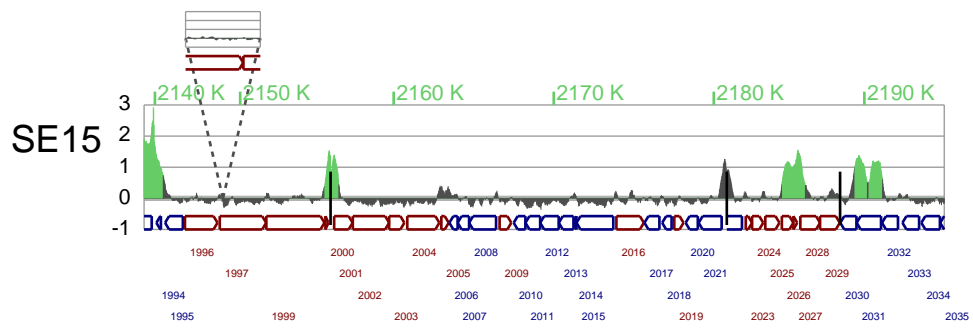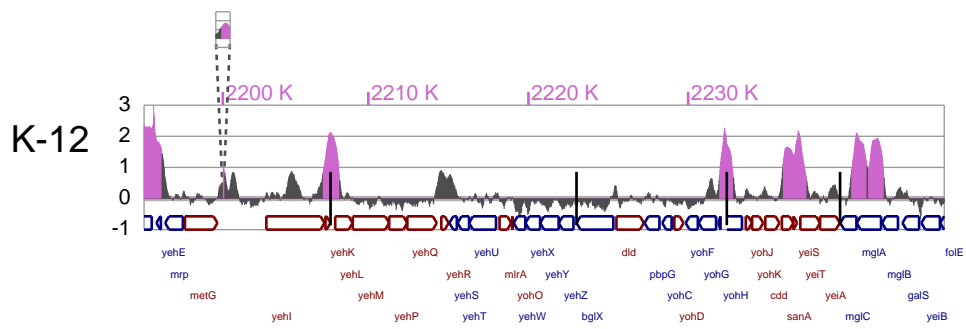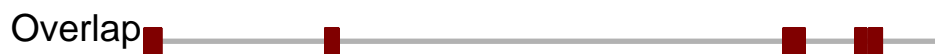

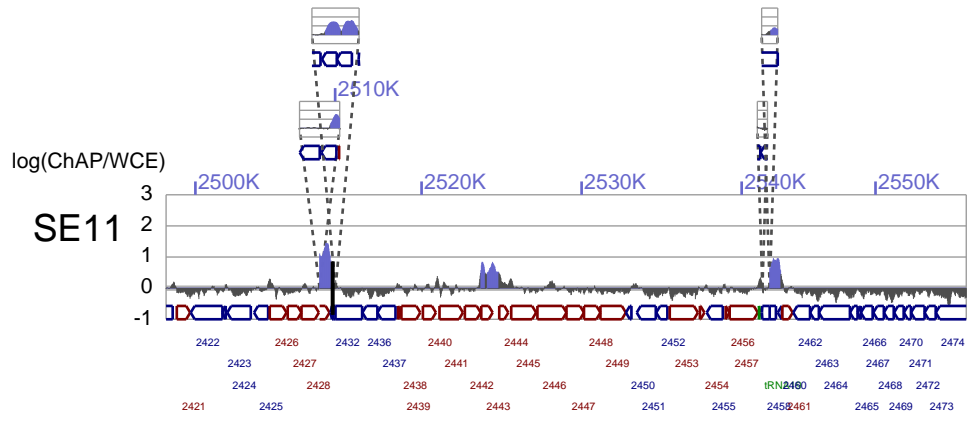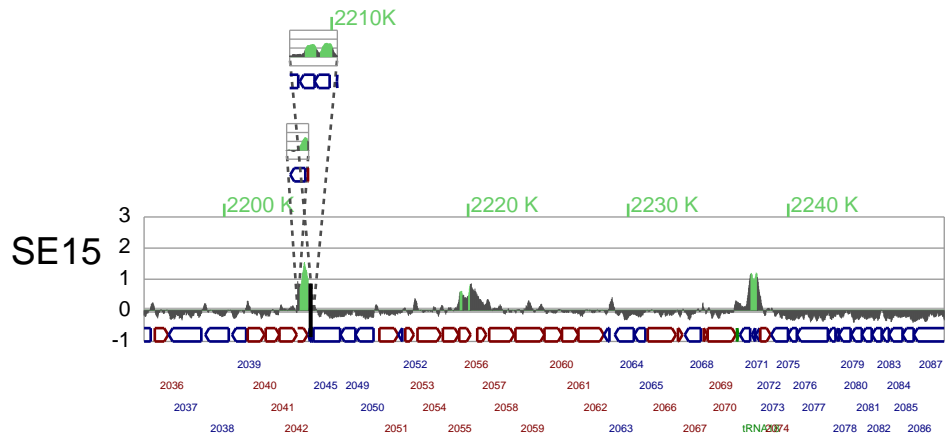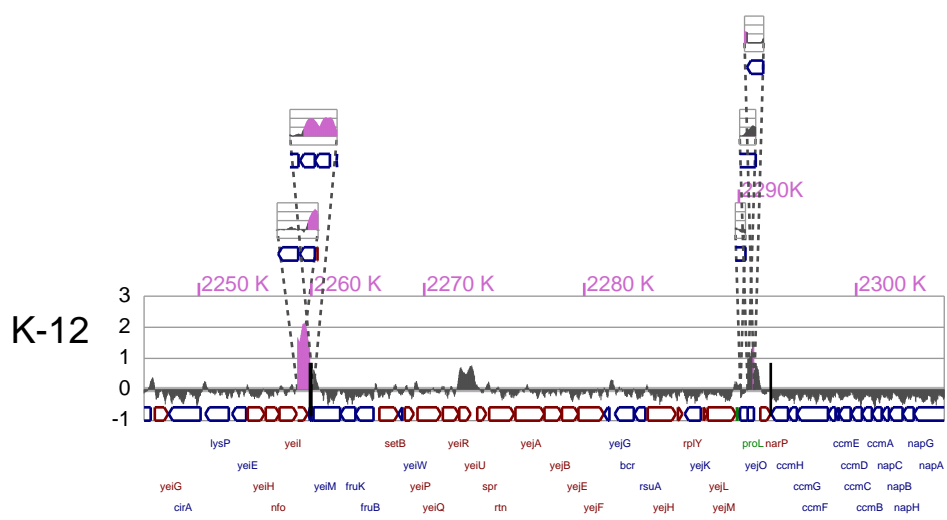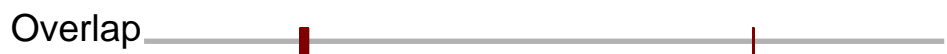

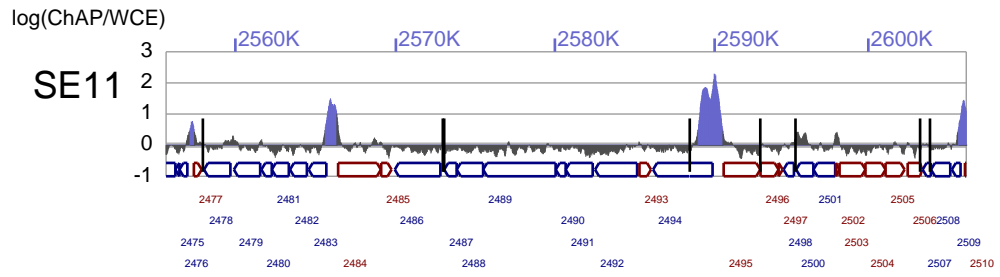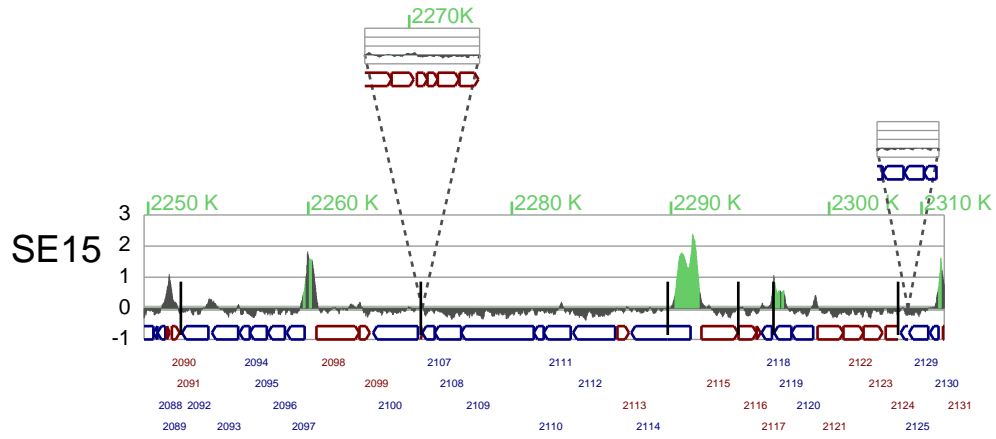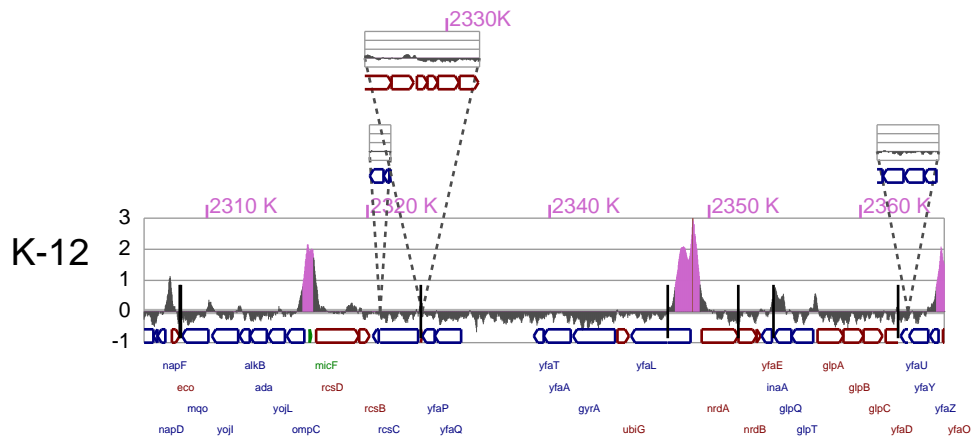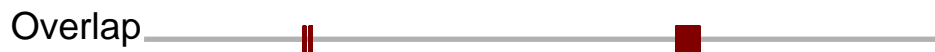

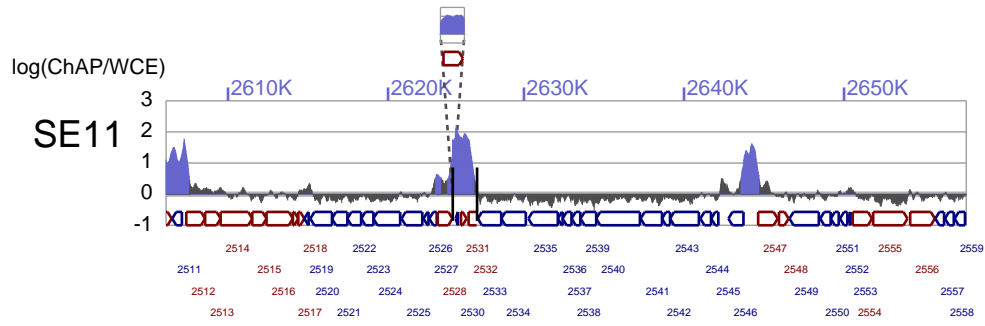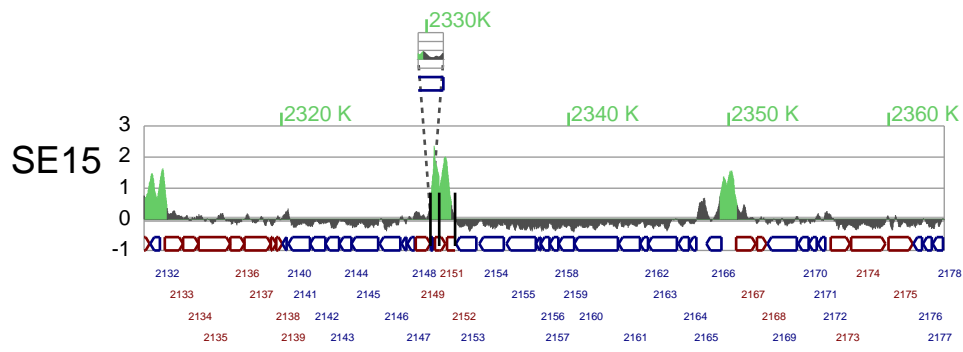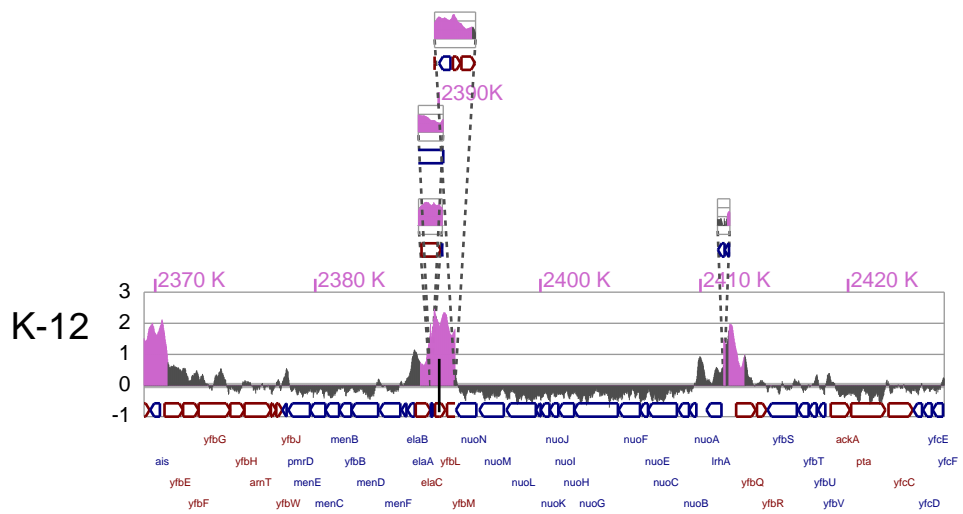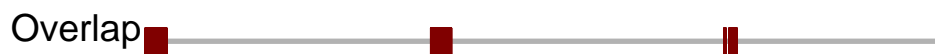



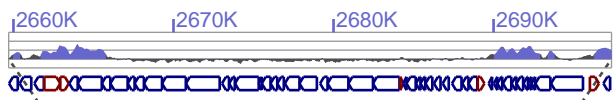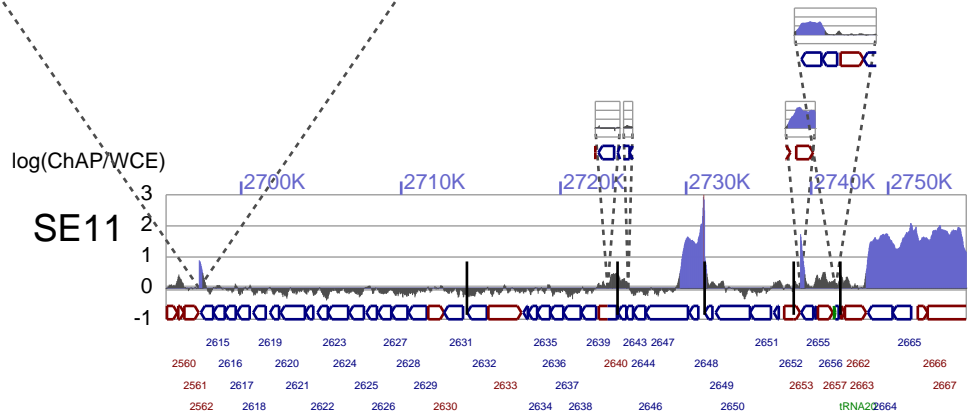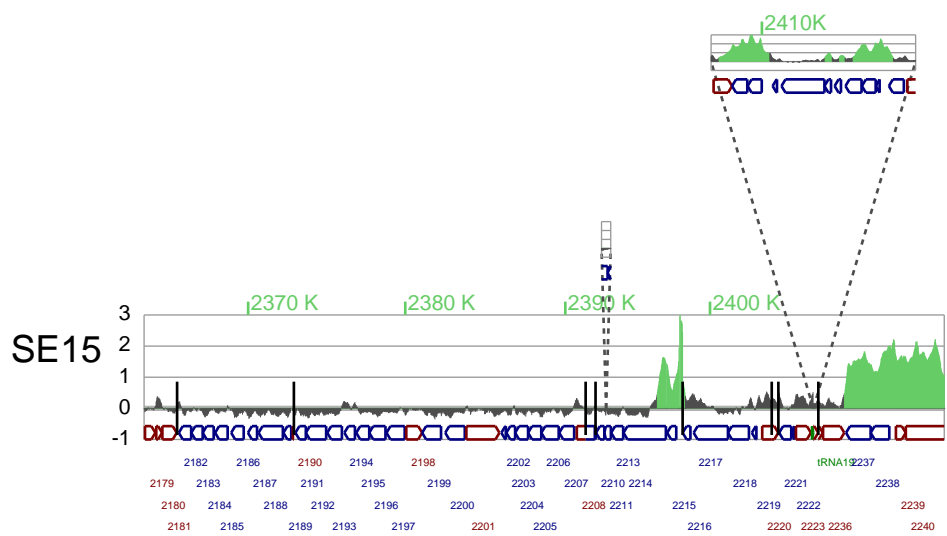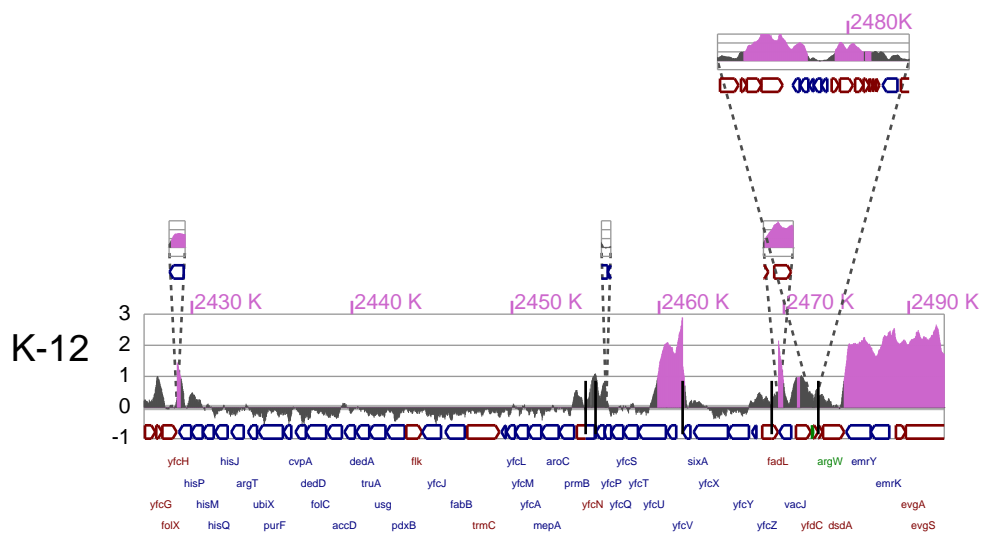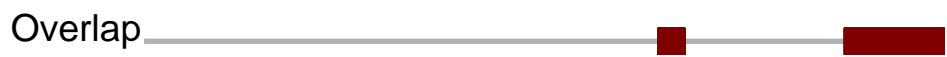

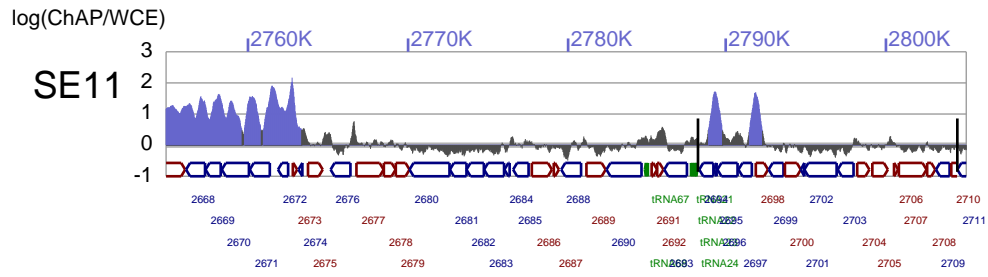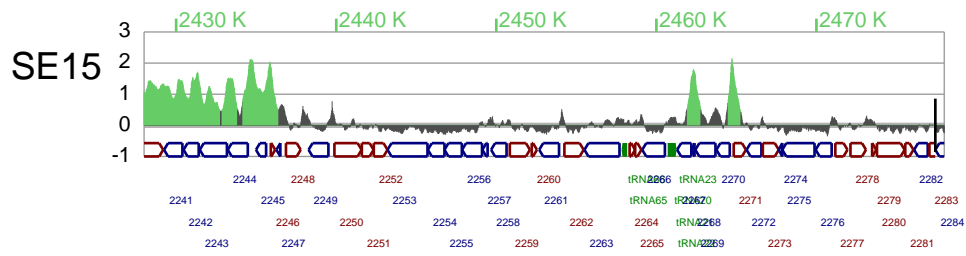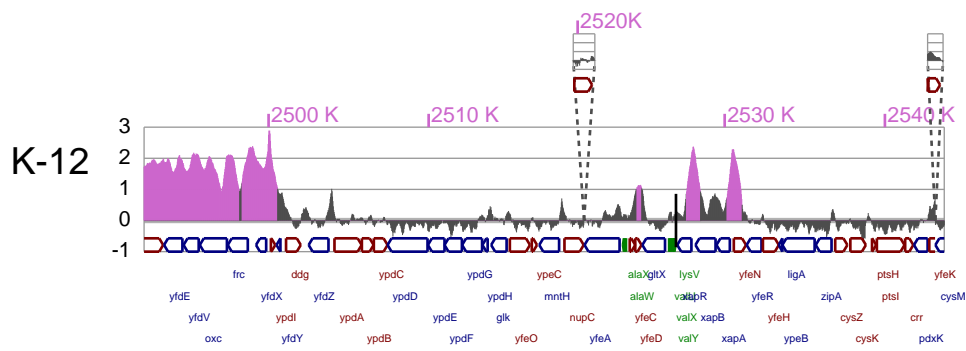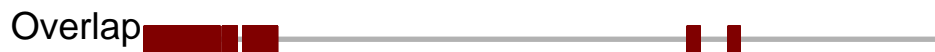

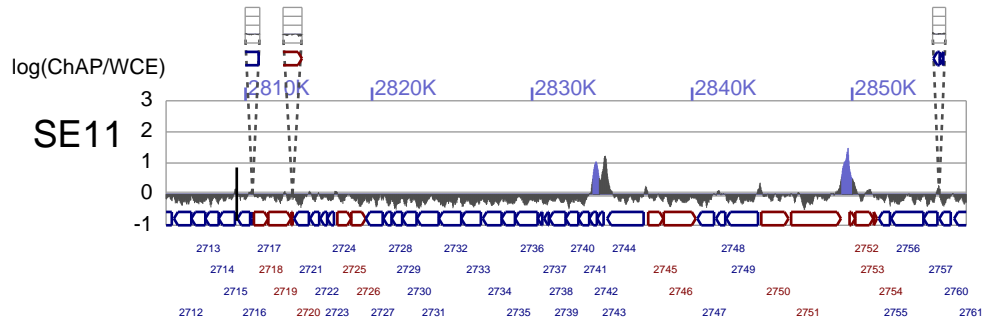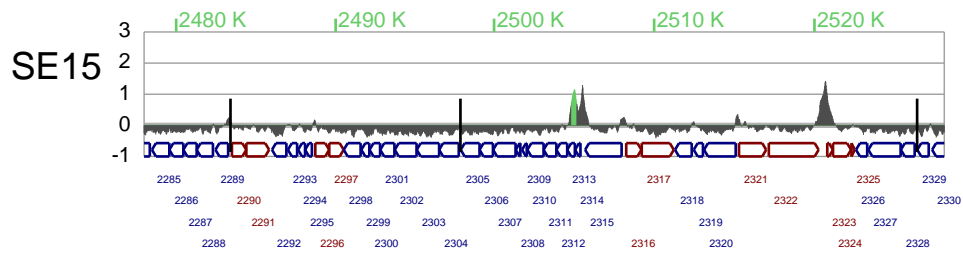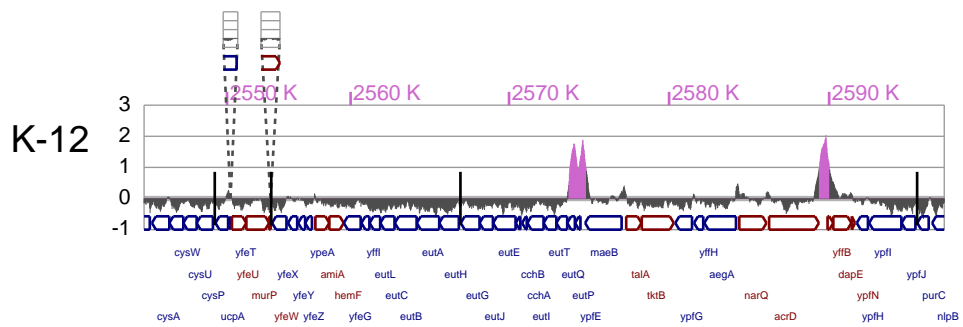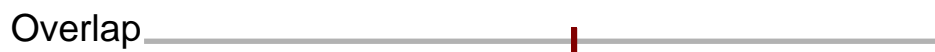

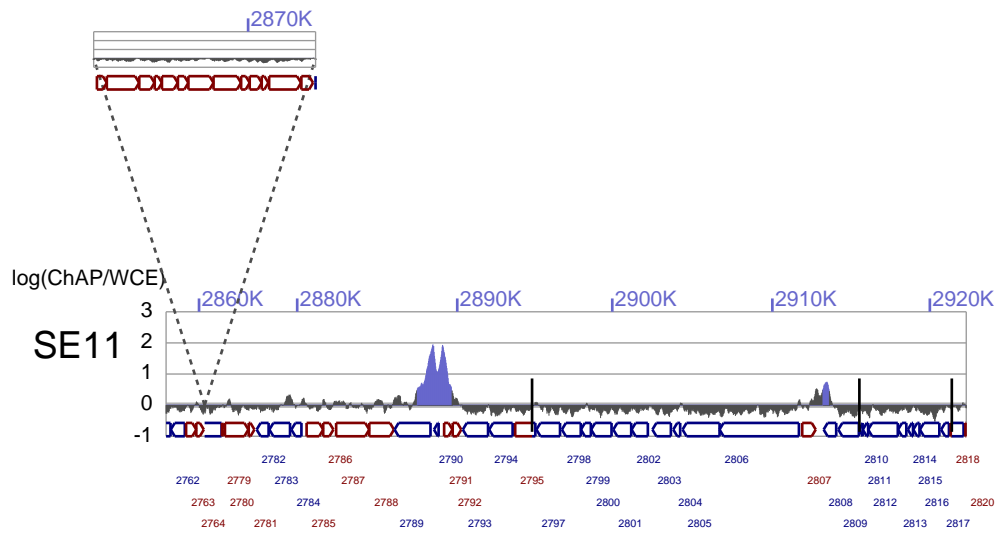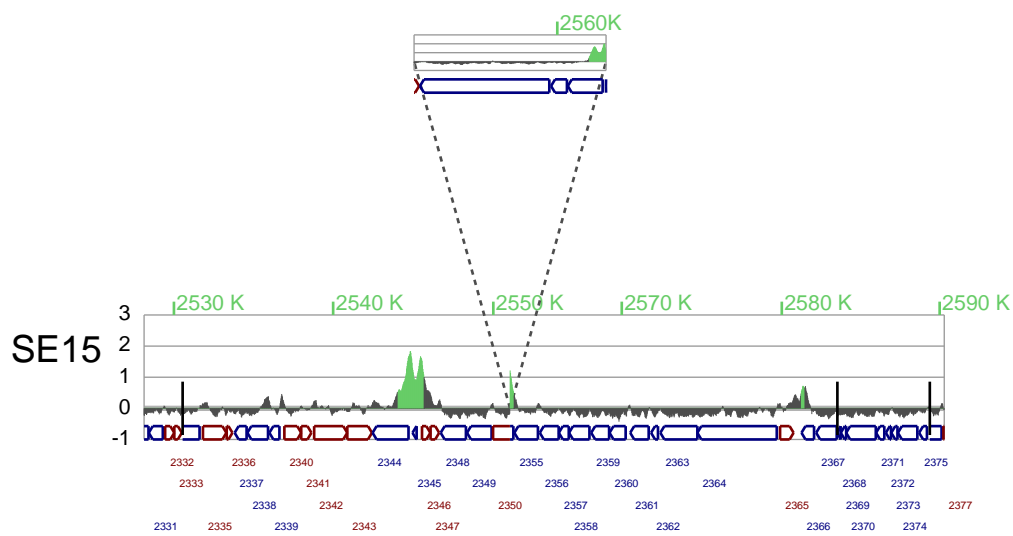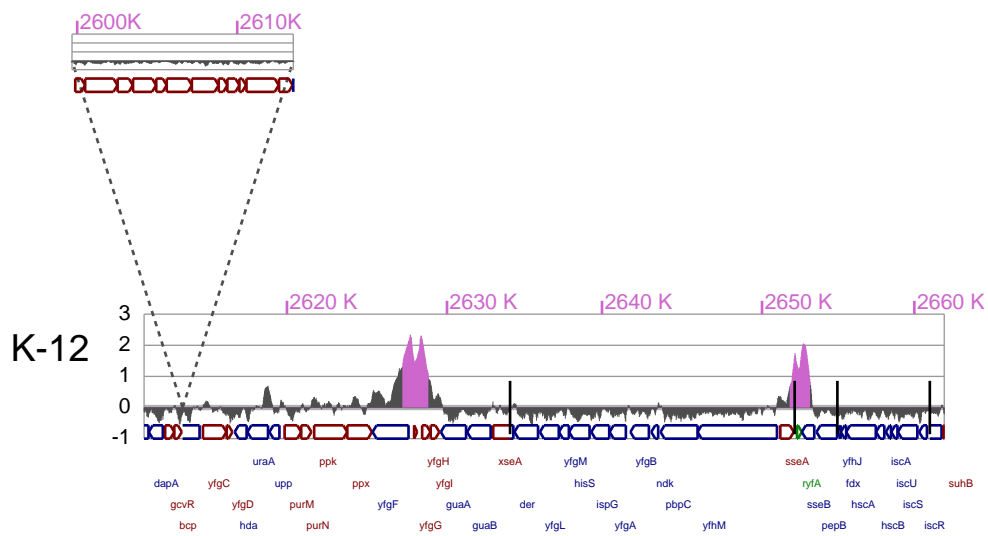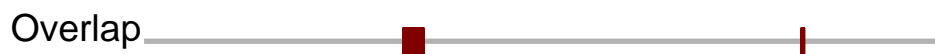

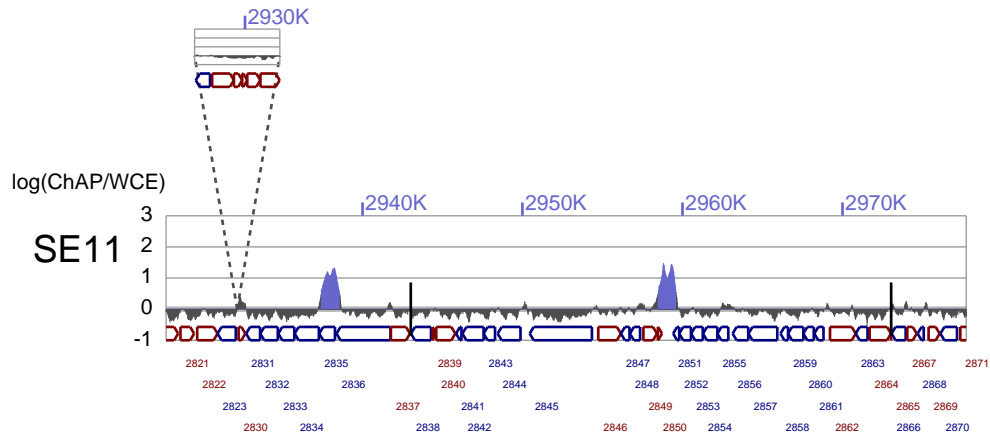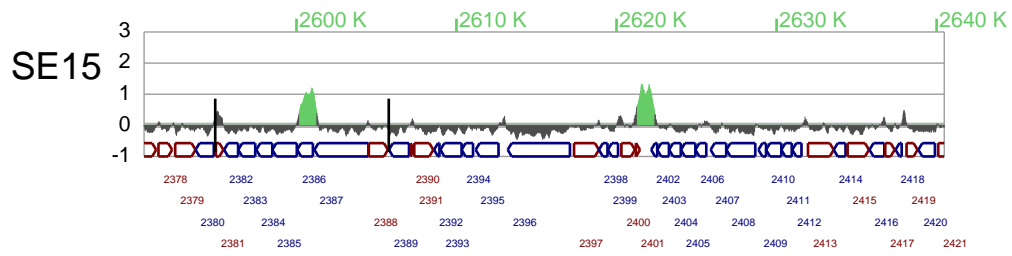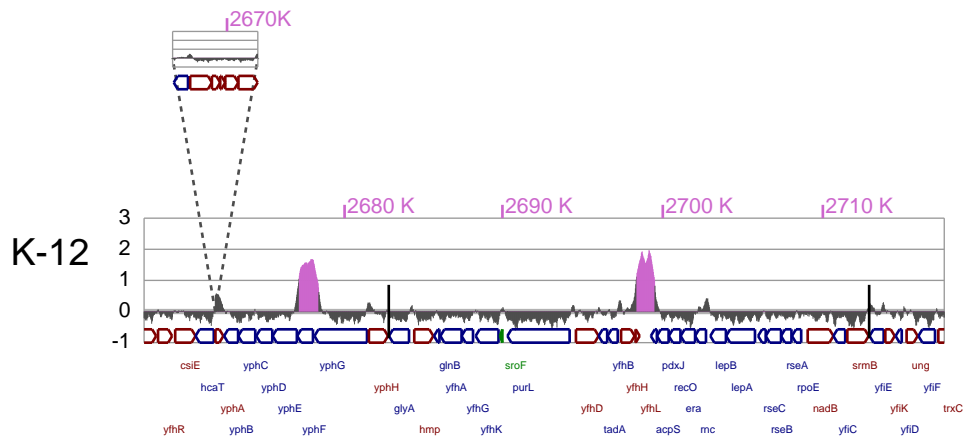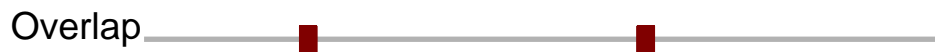

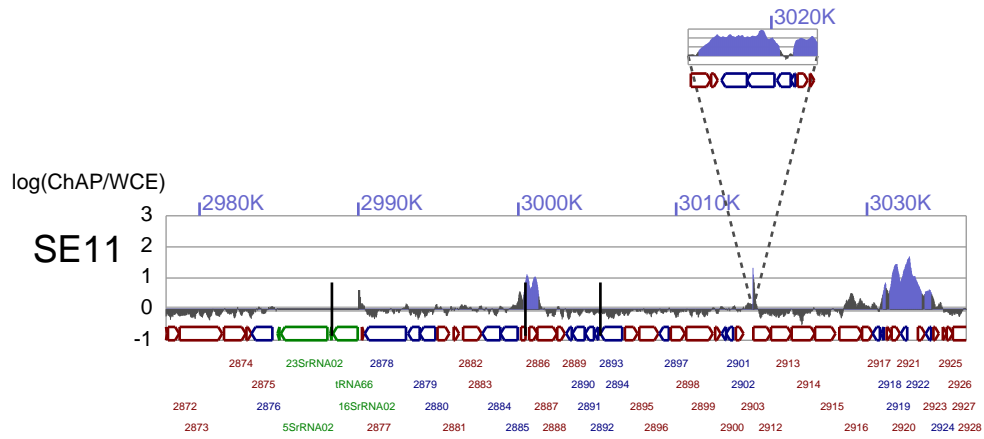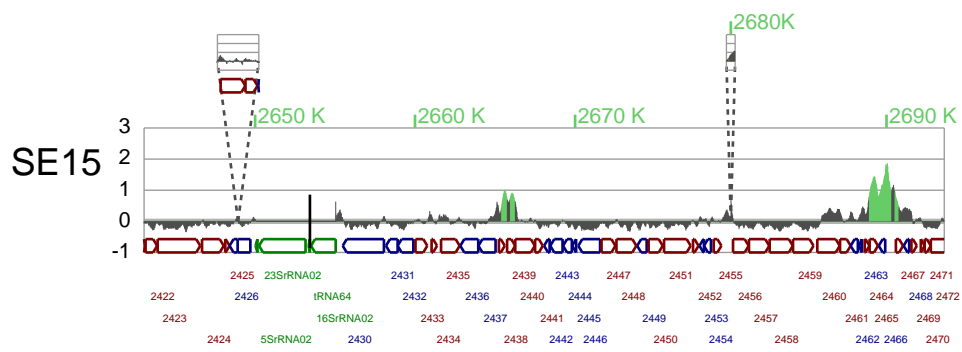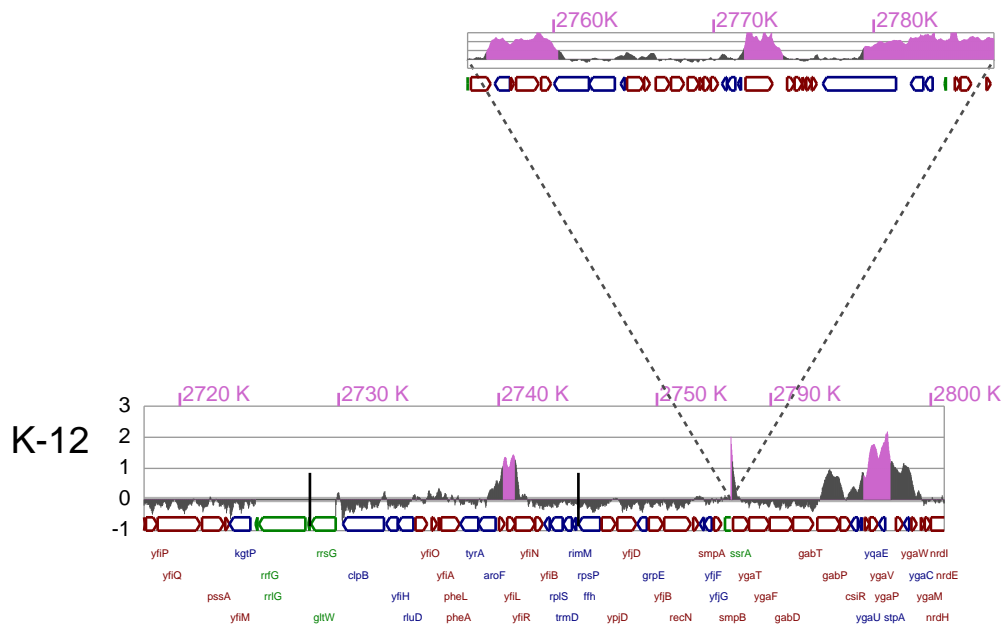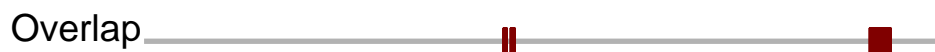

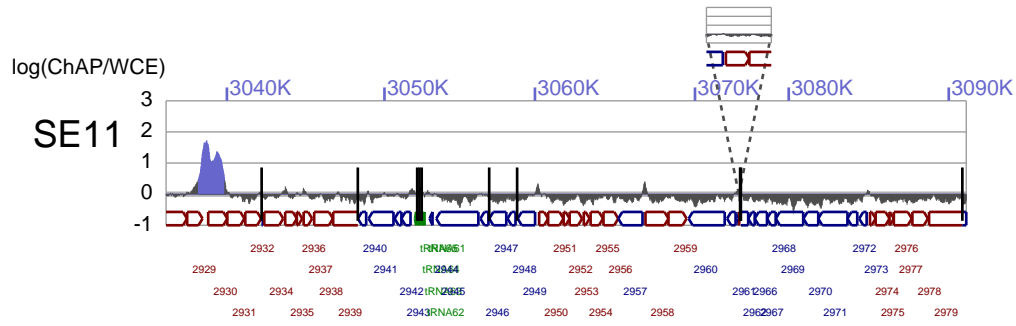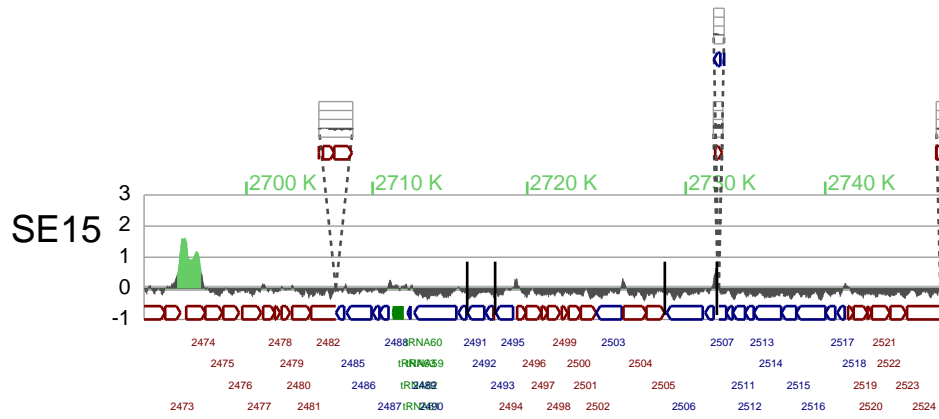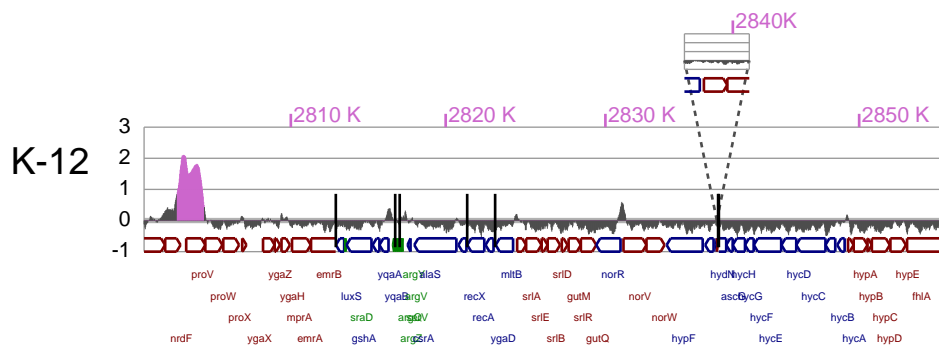

Overlap

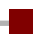

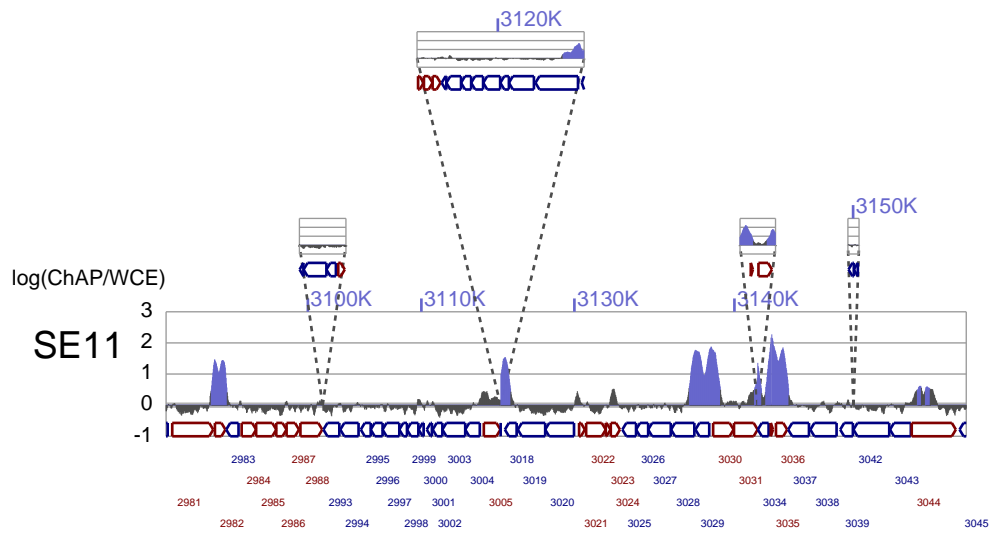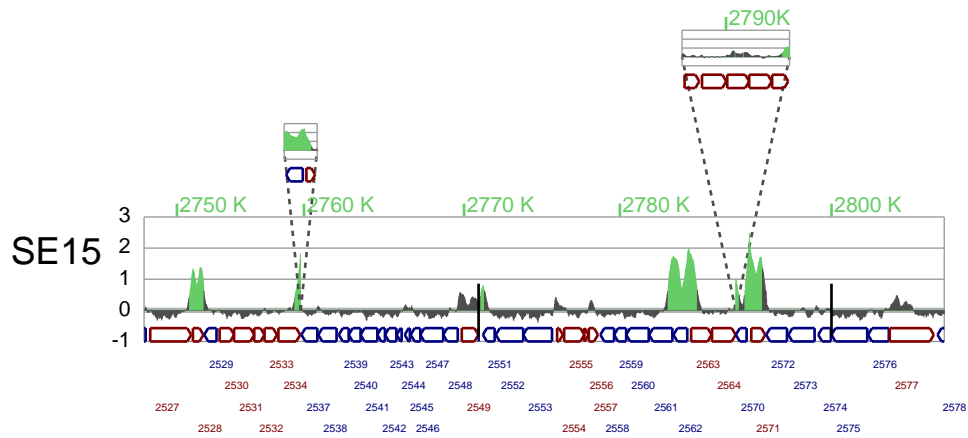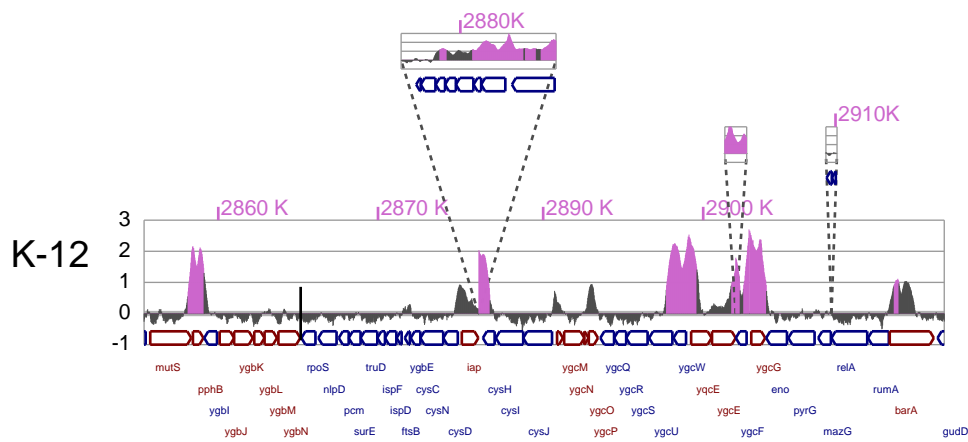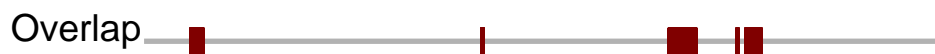



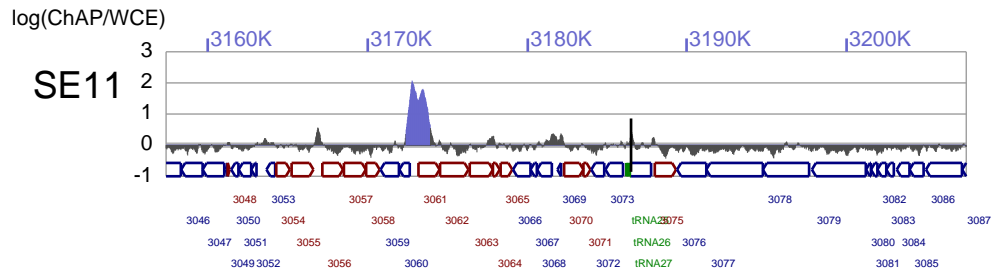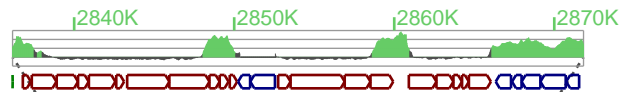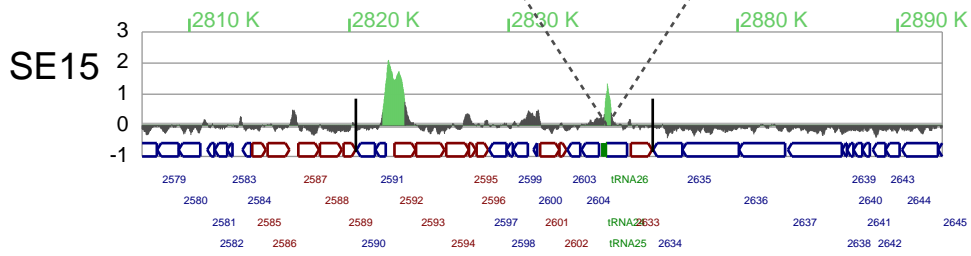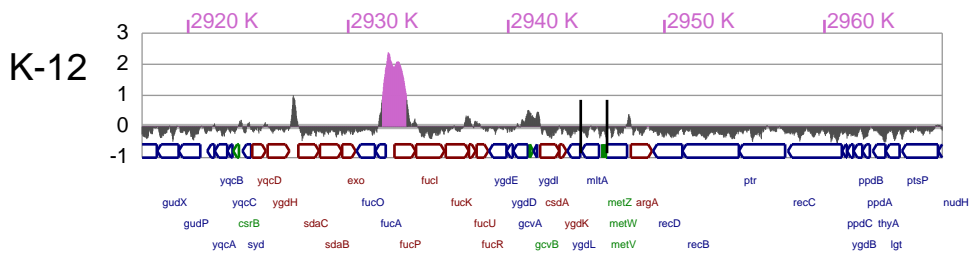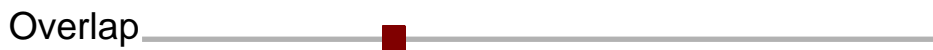

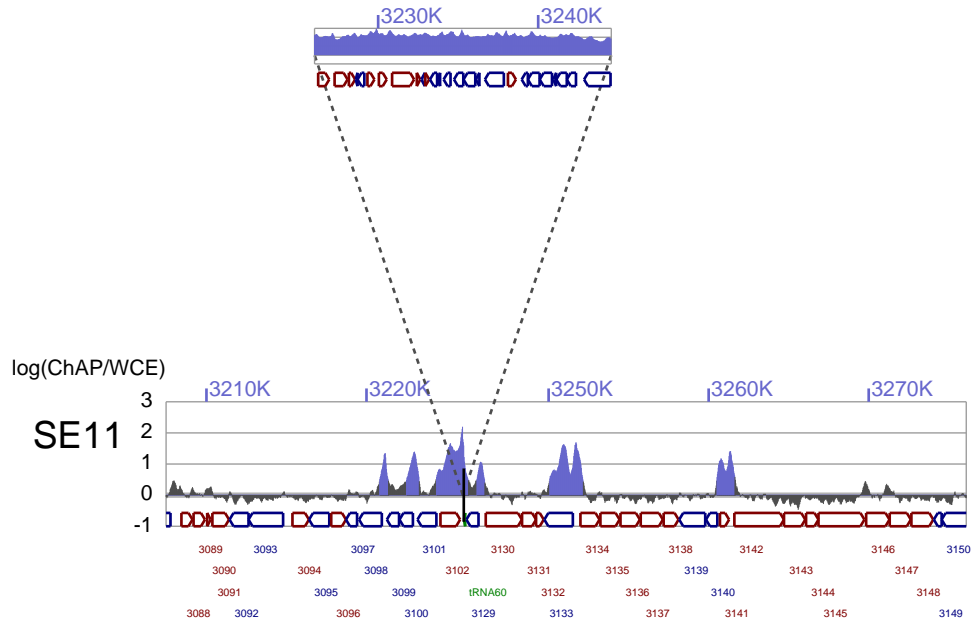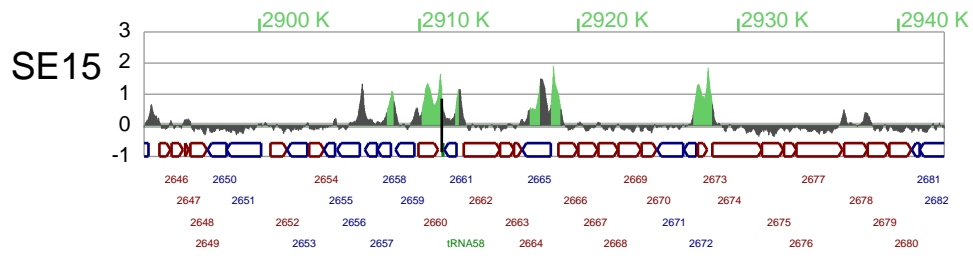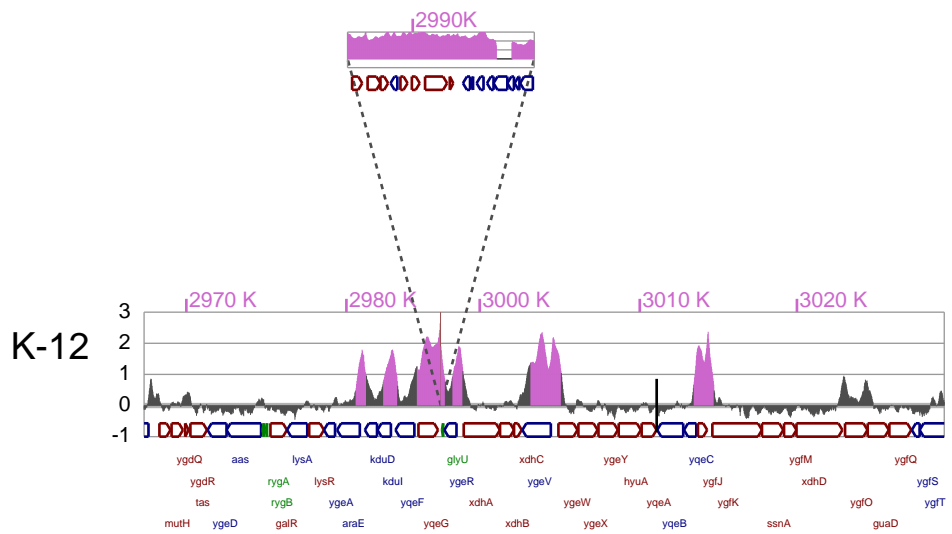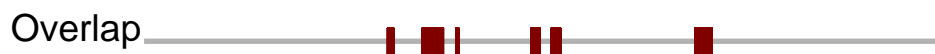

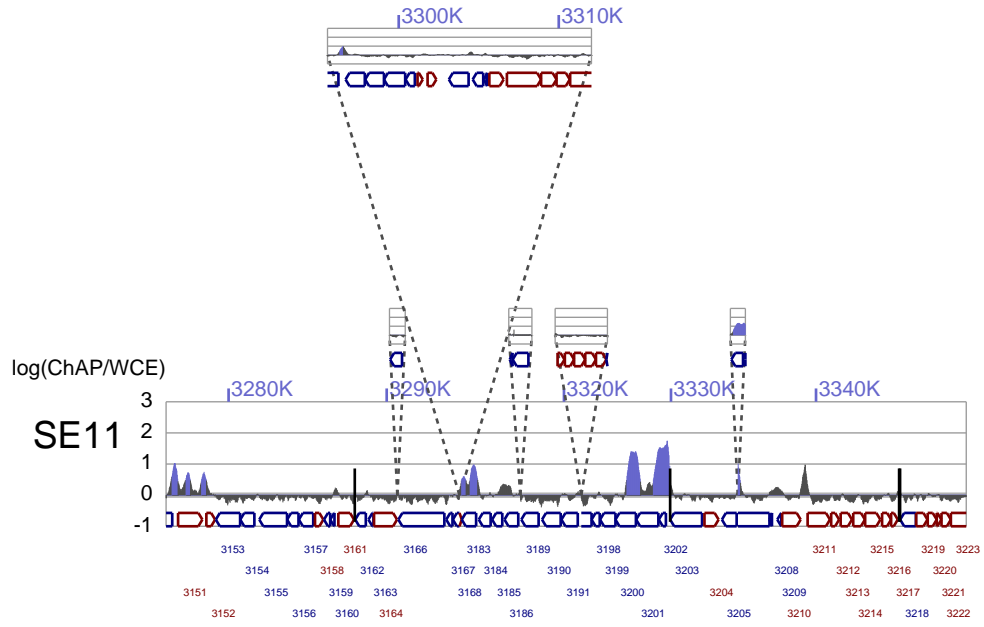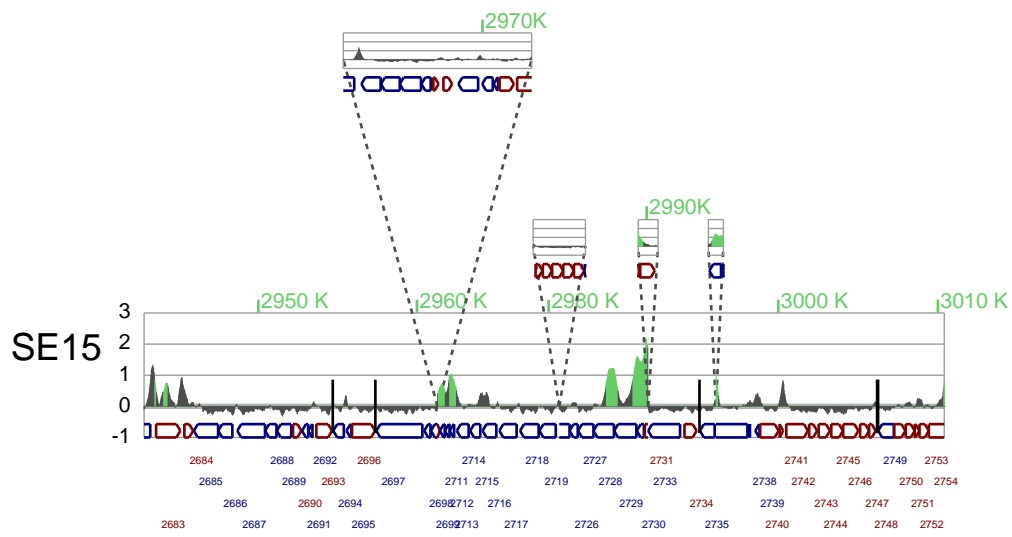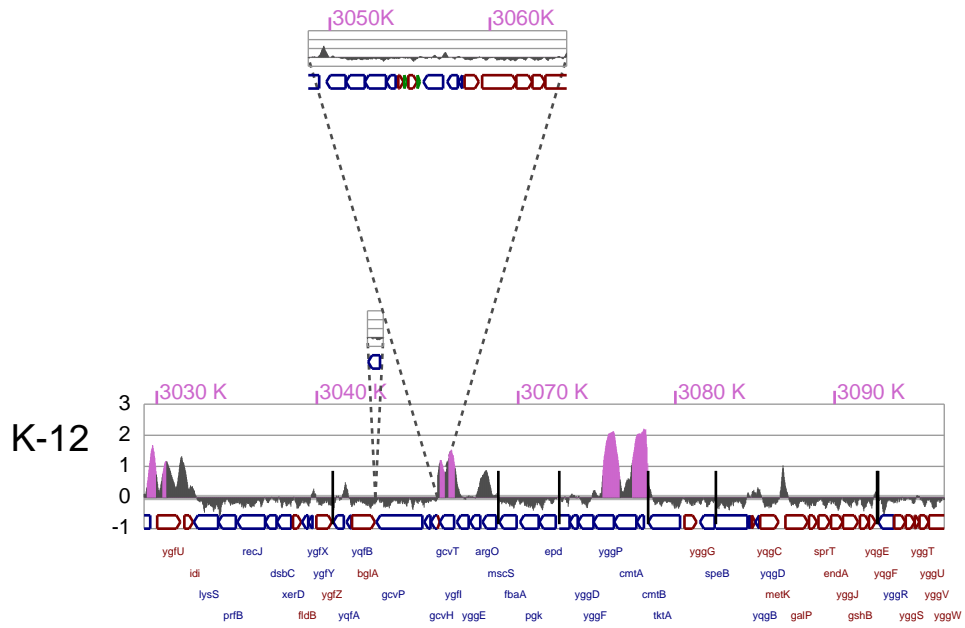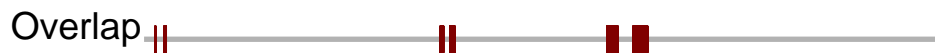

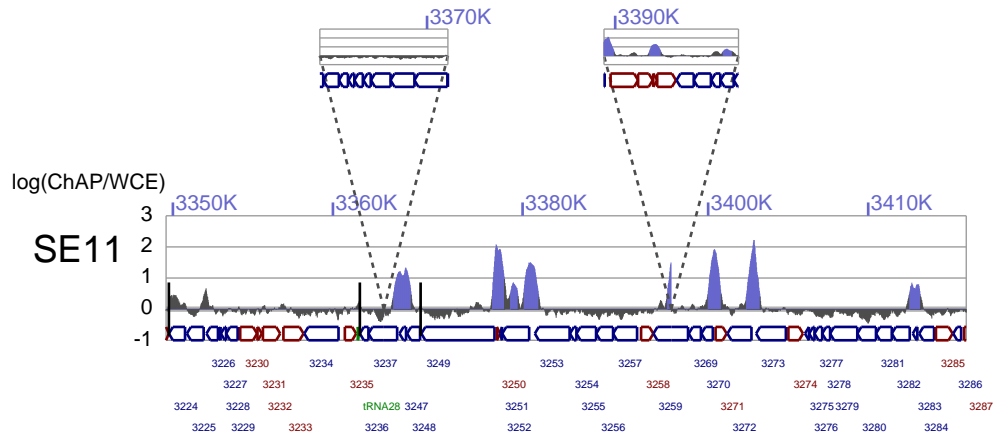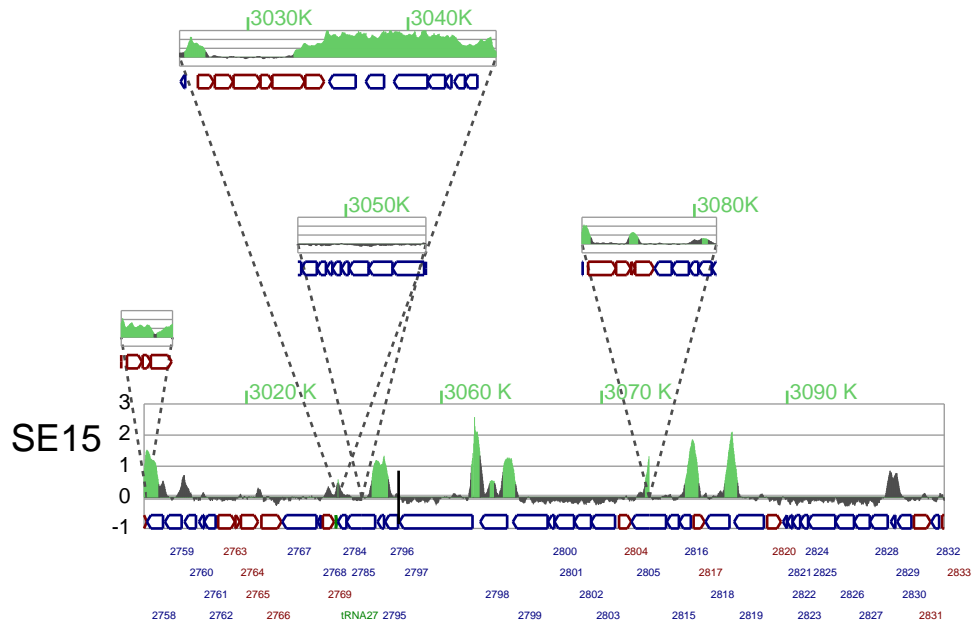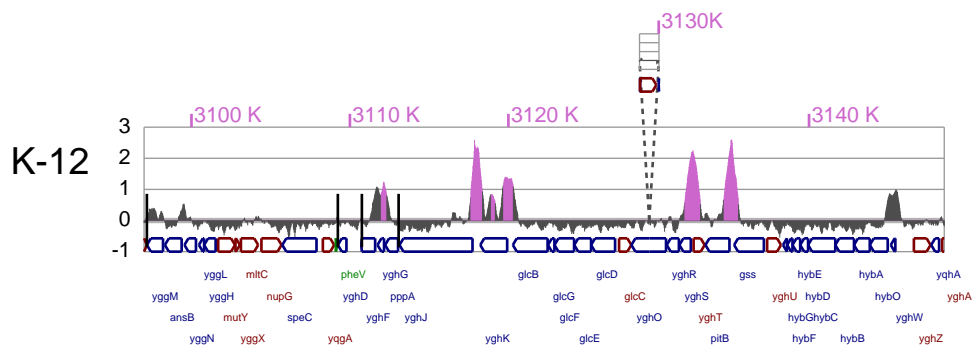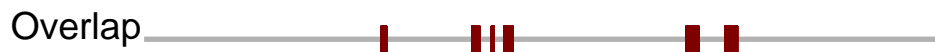

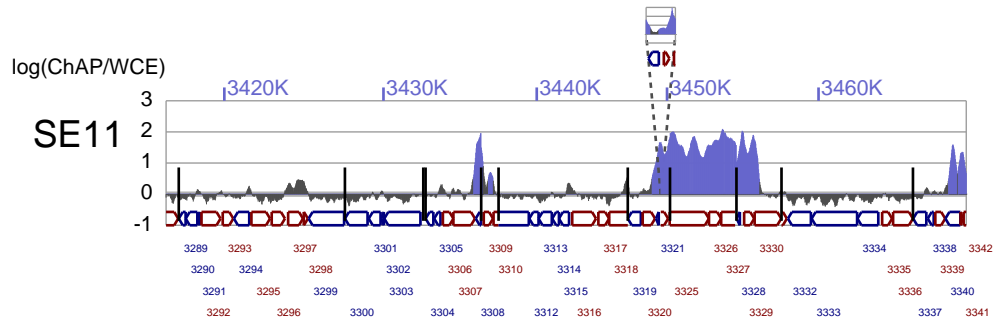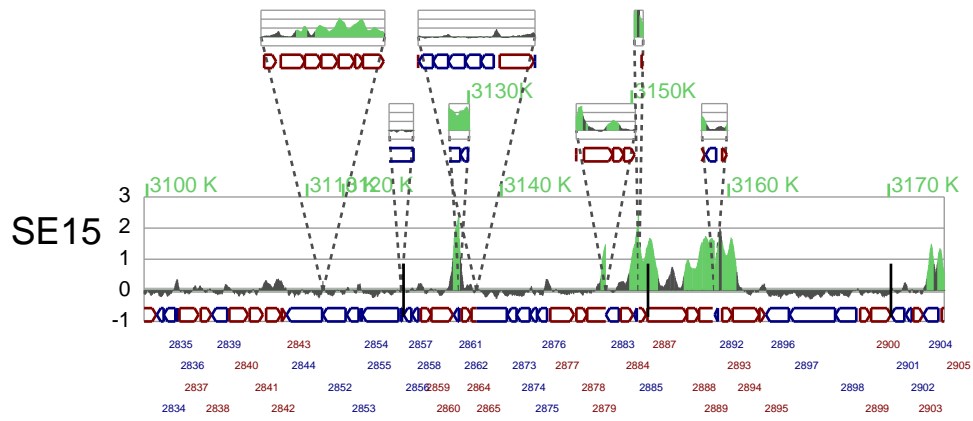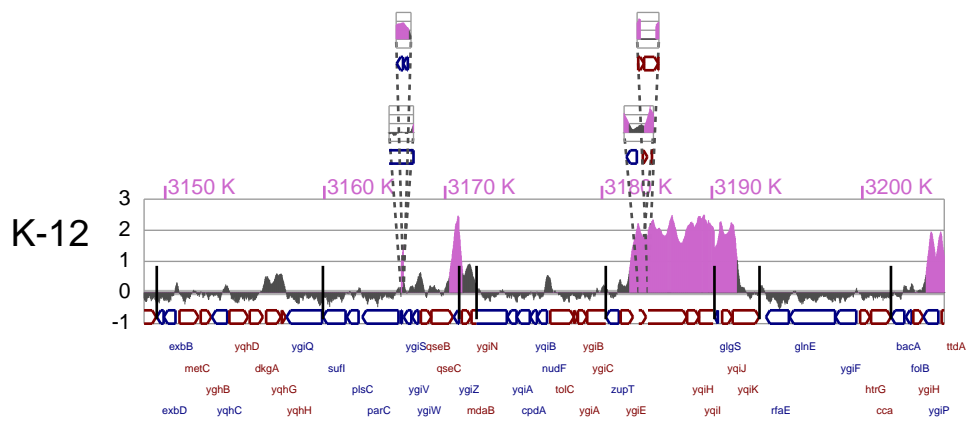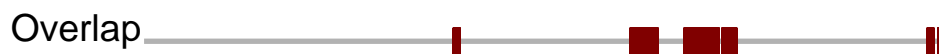

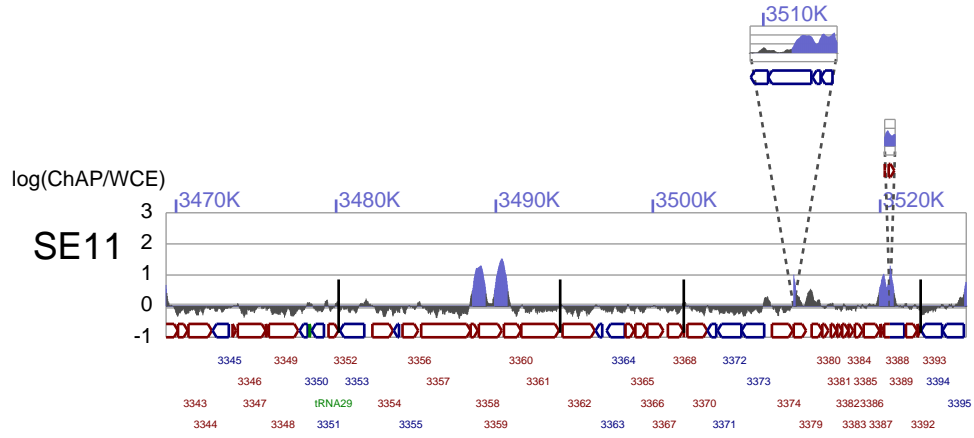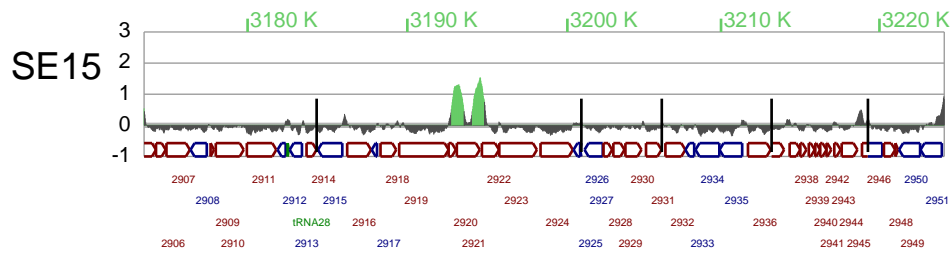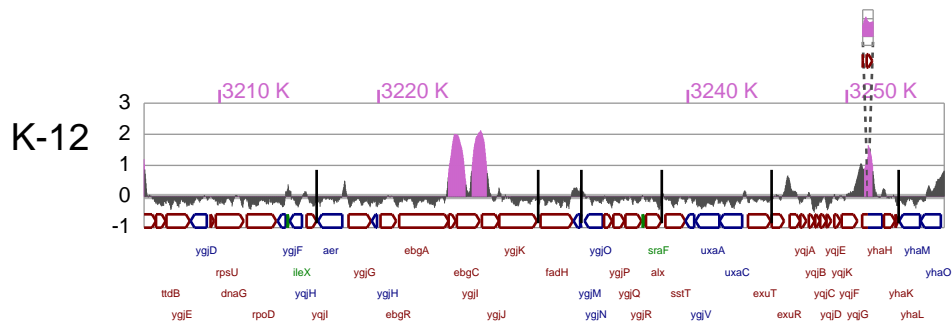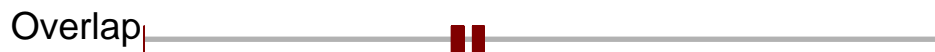

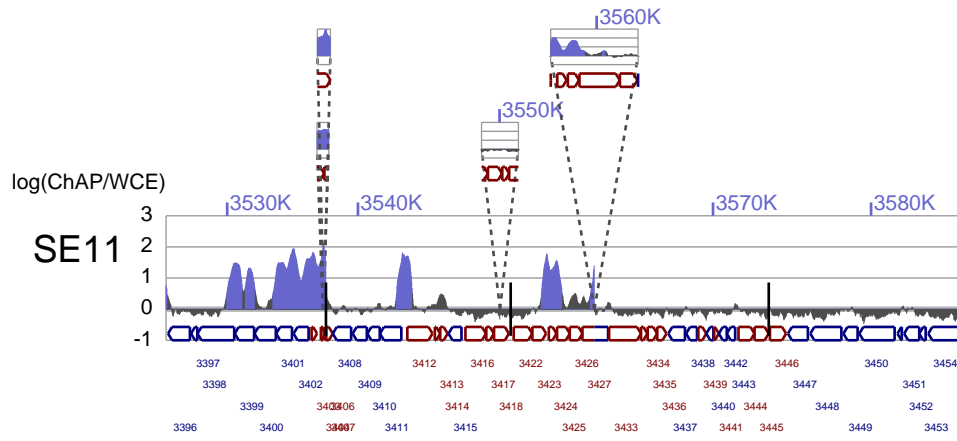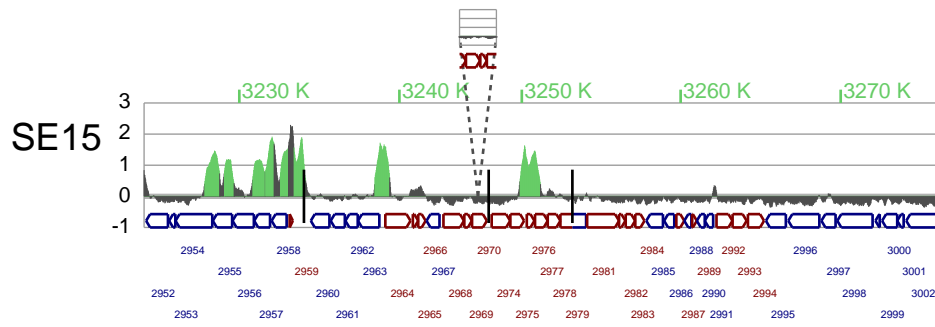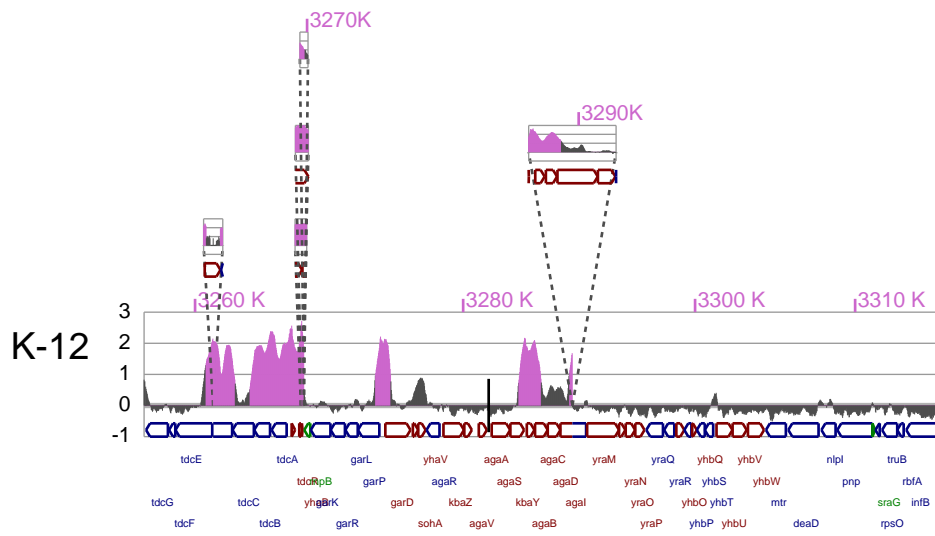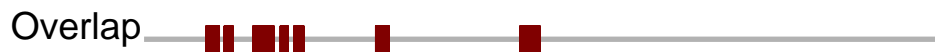

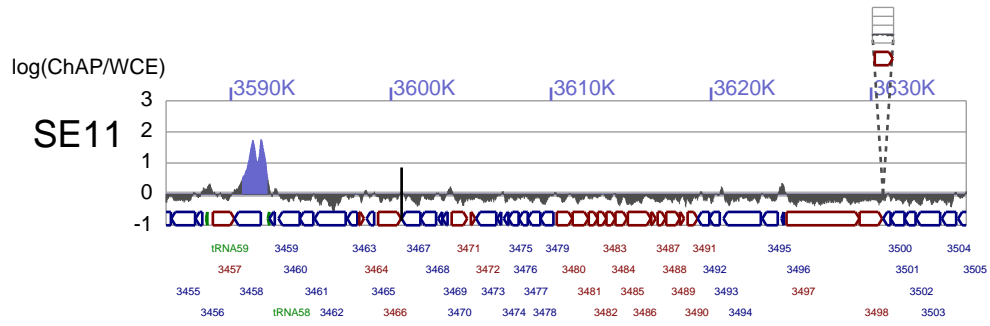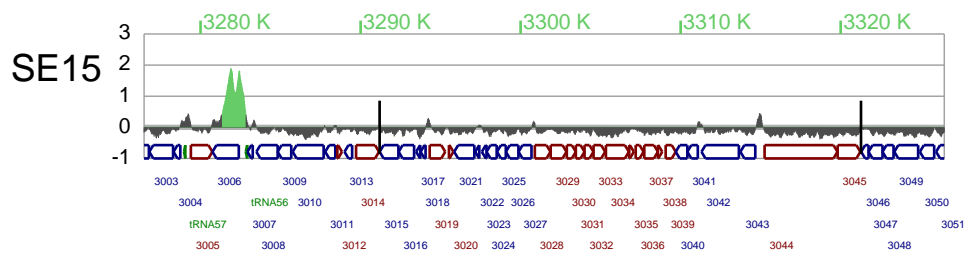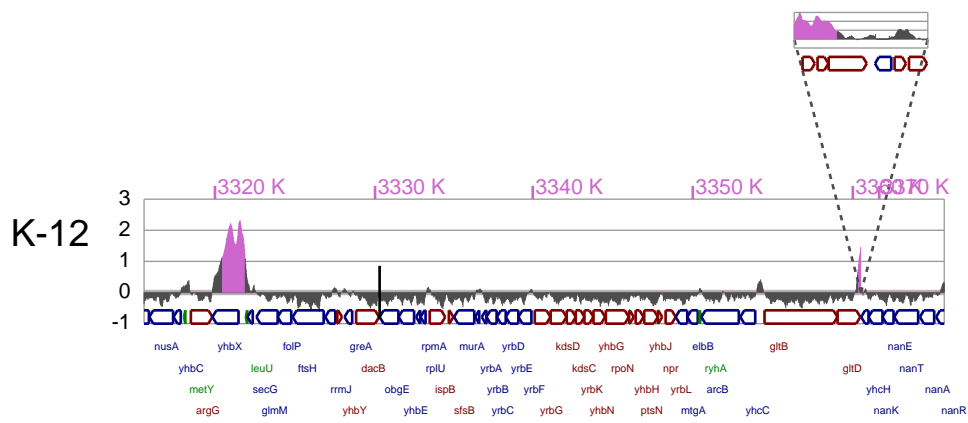

Overlap 



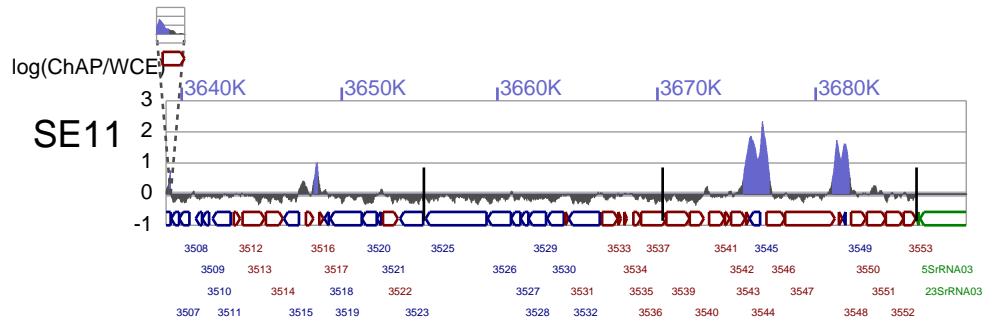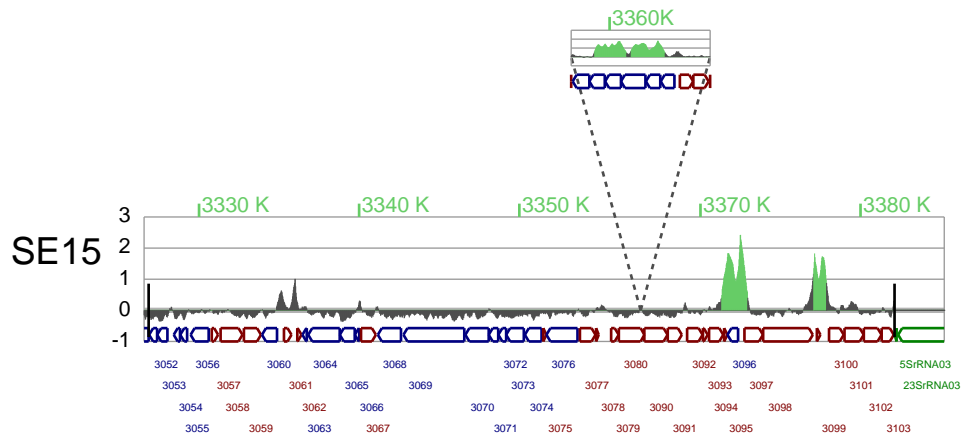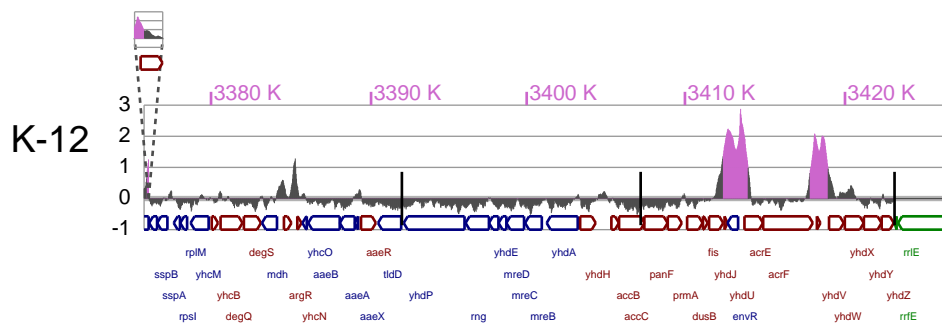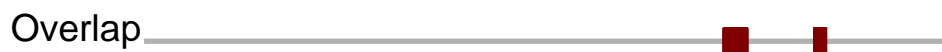

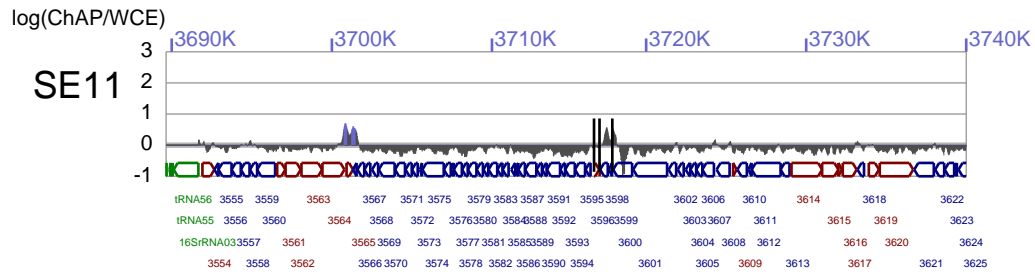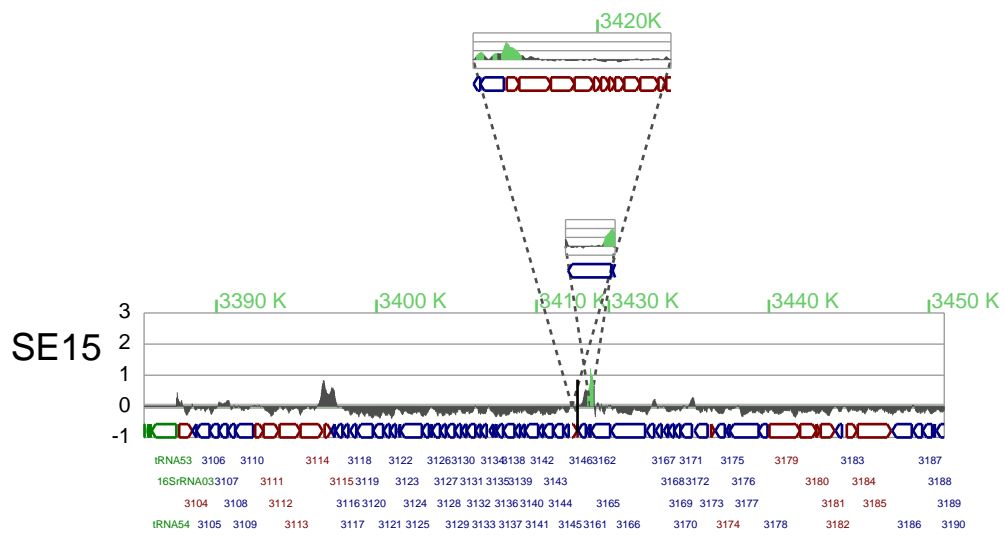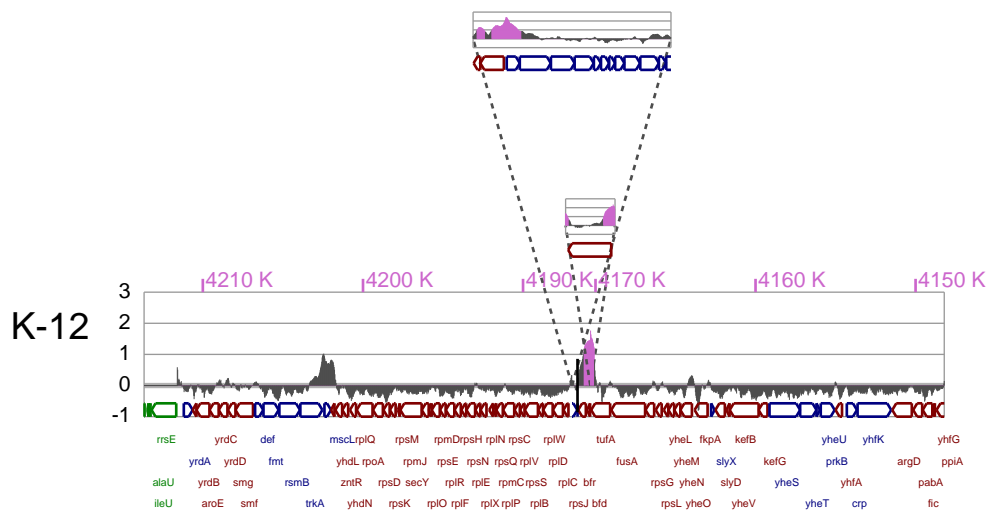

Overlap

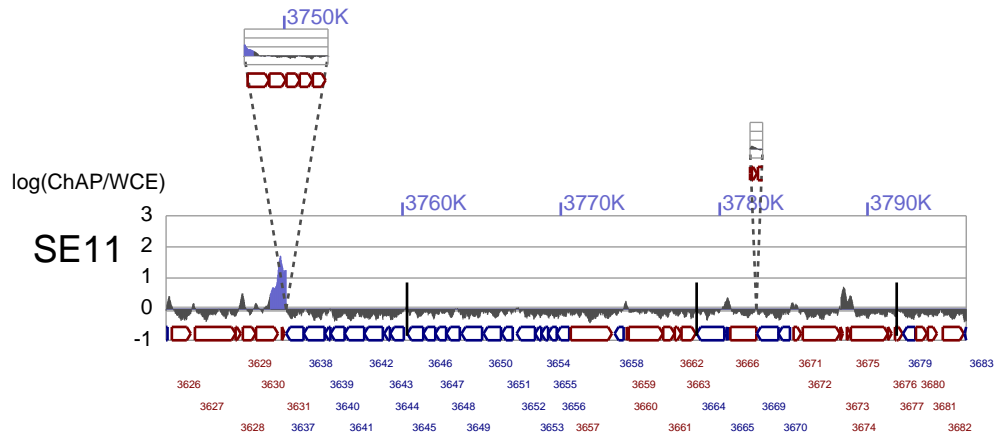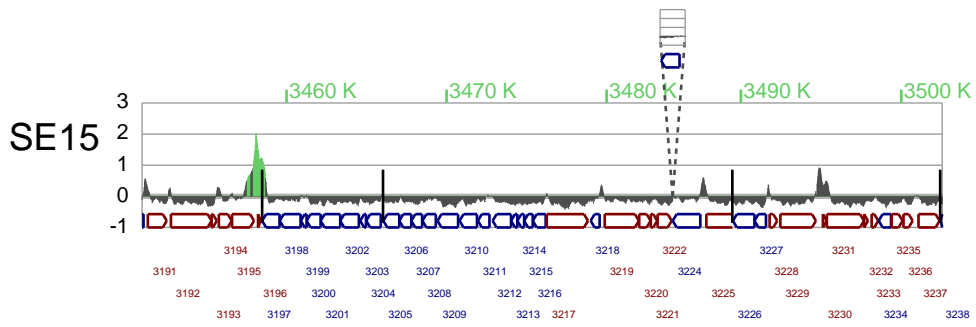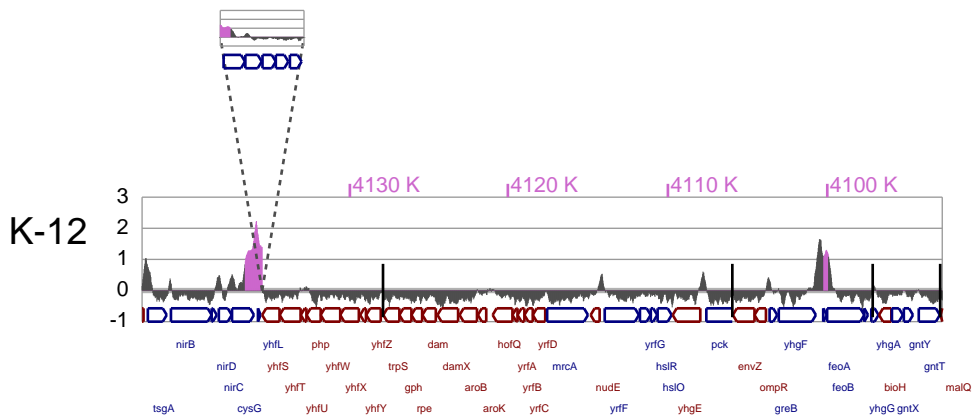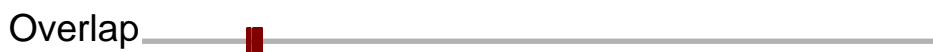

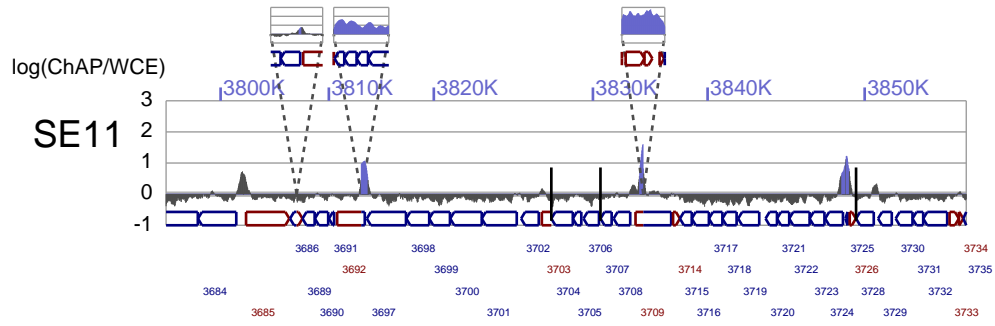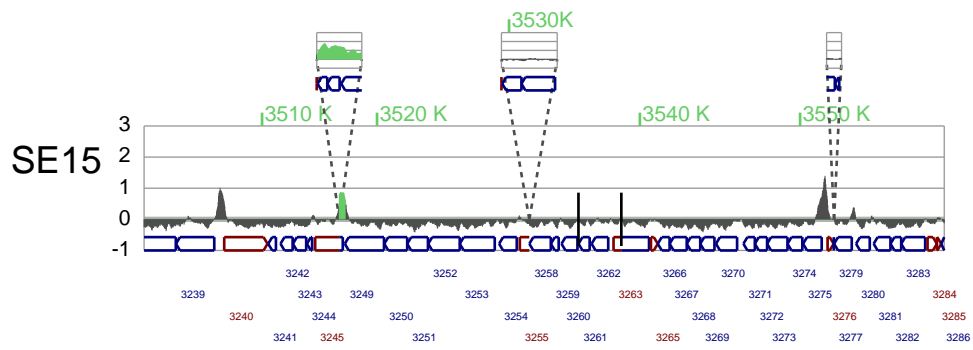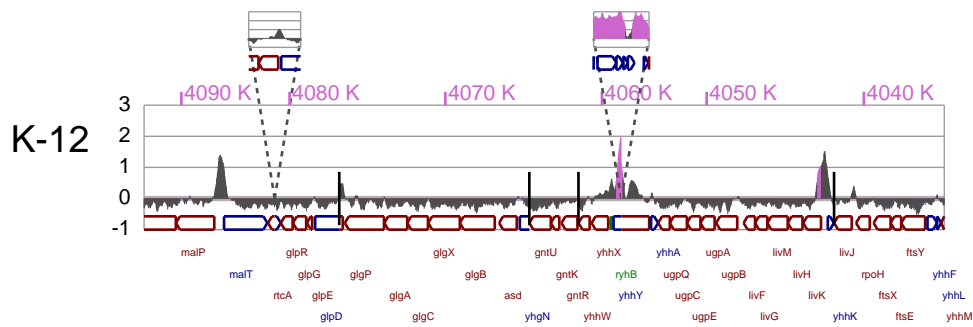

Overlap

---

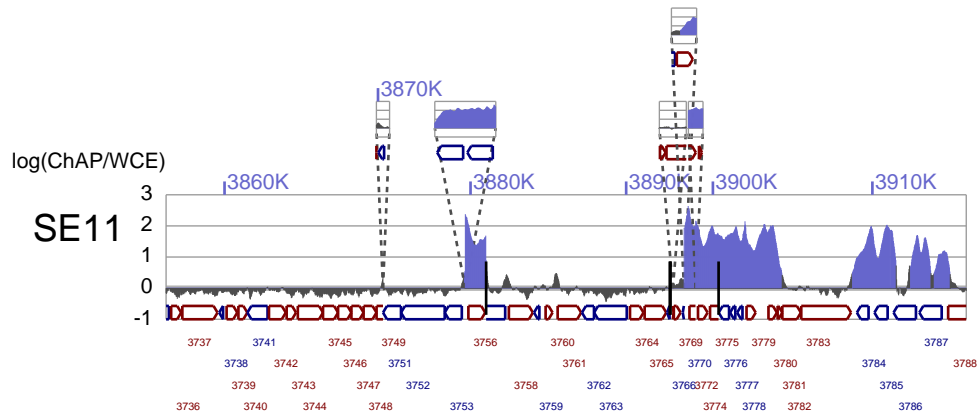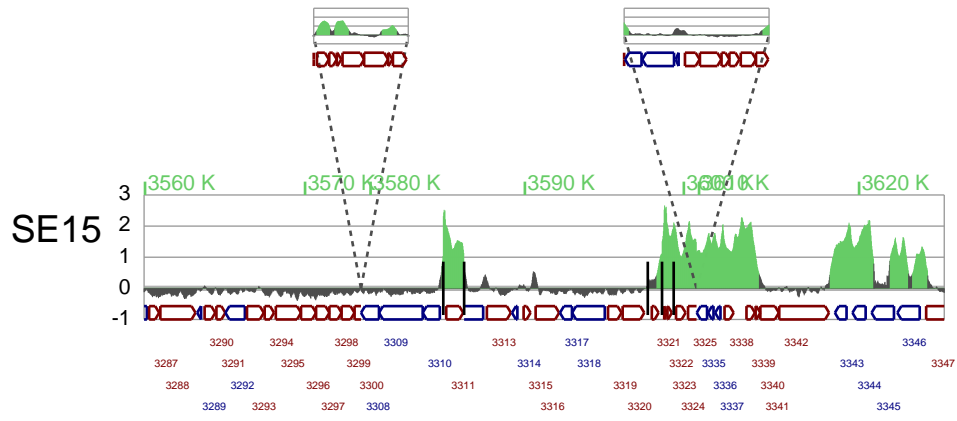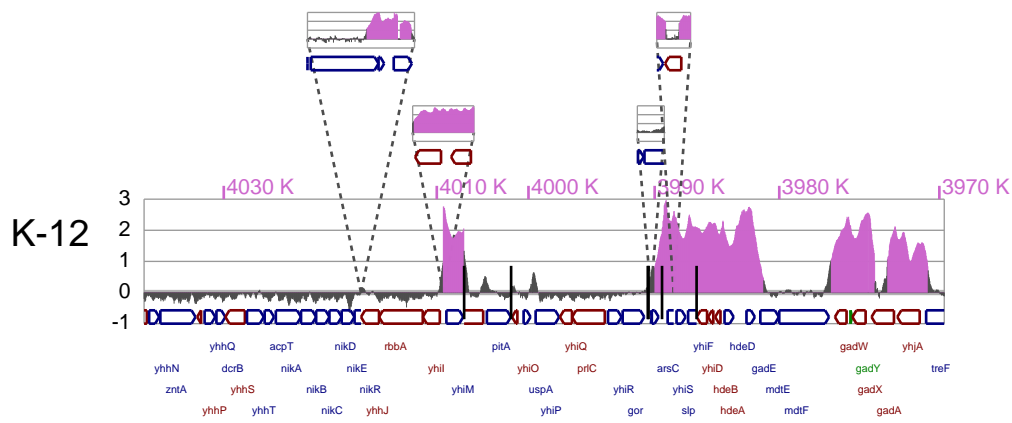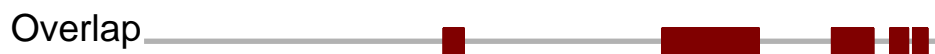

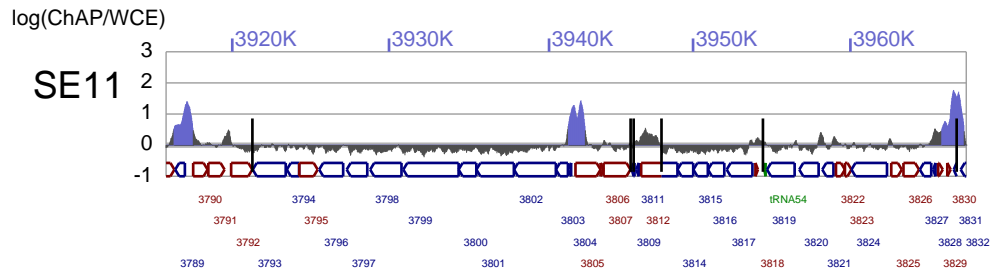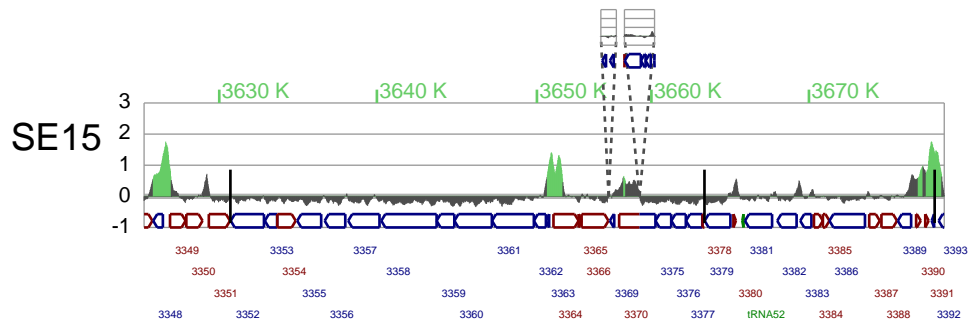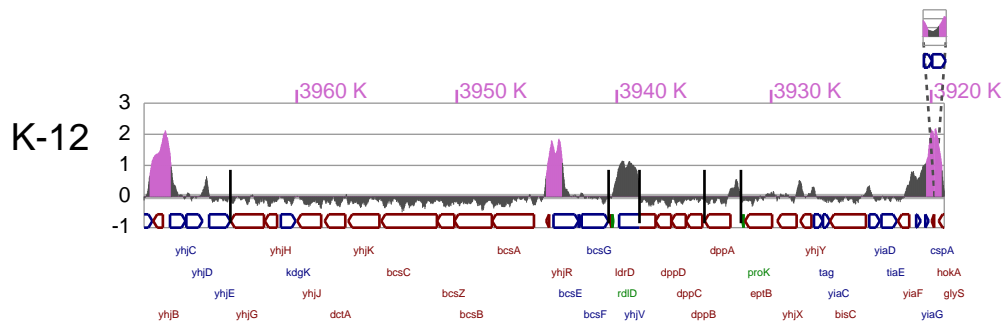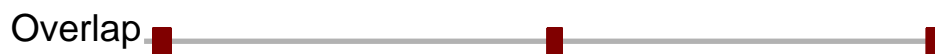

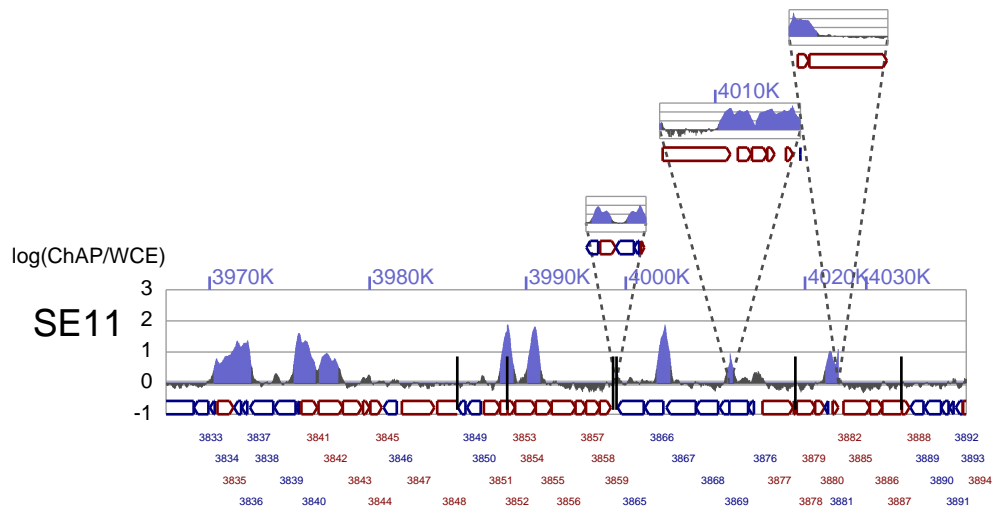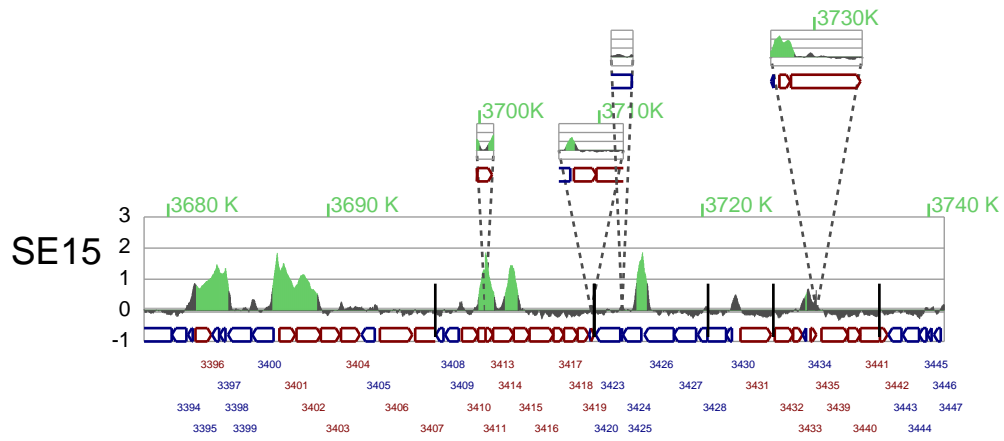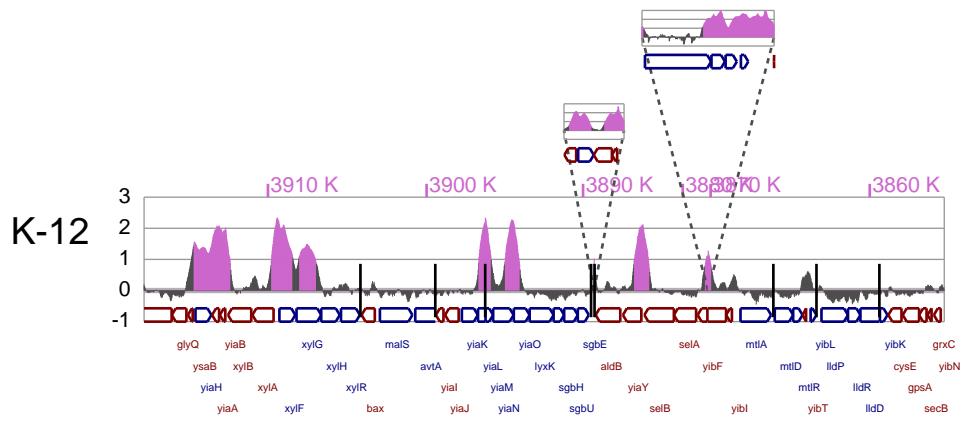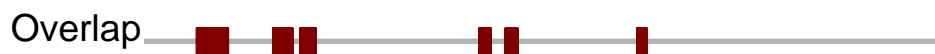

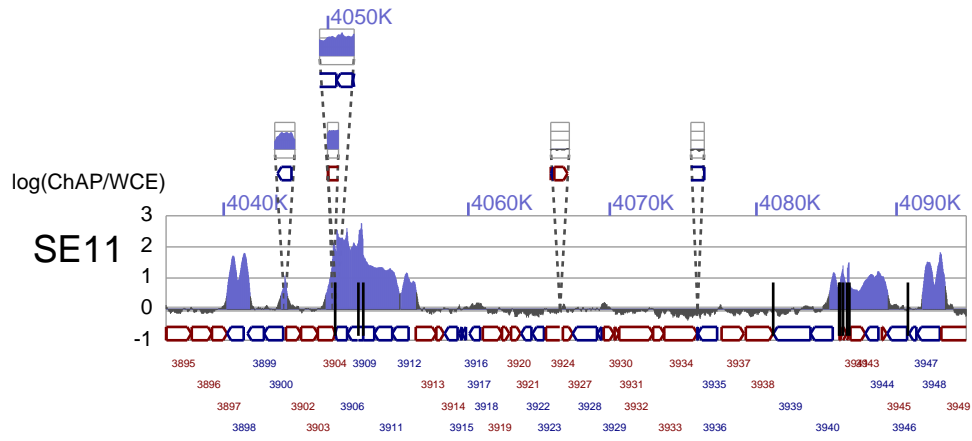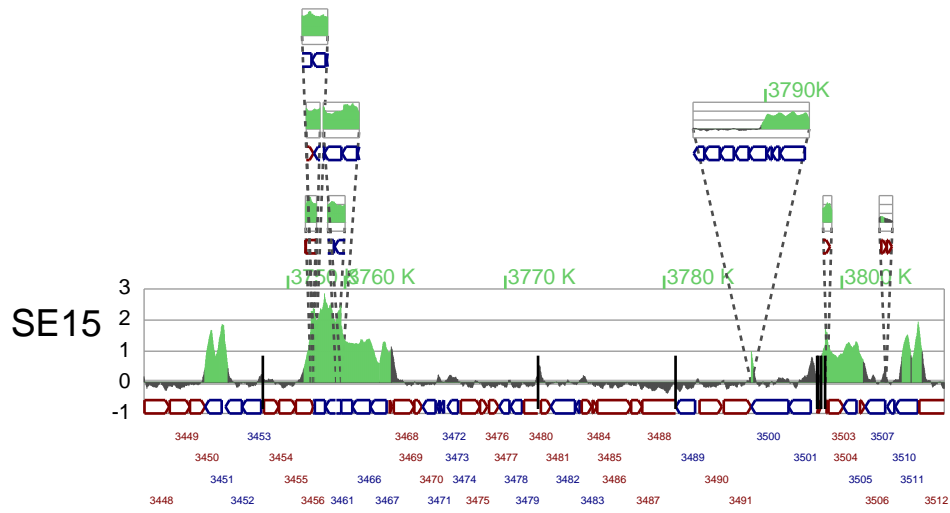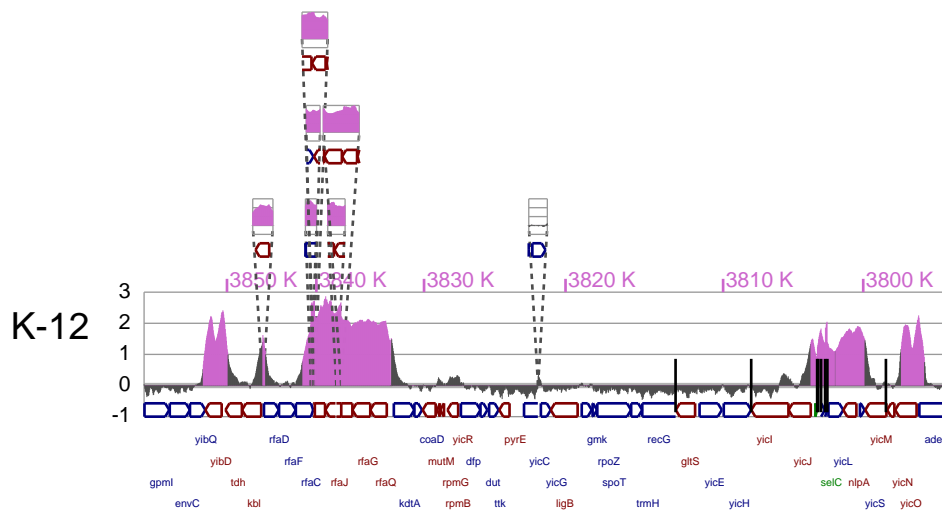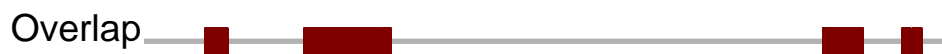



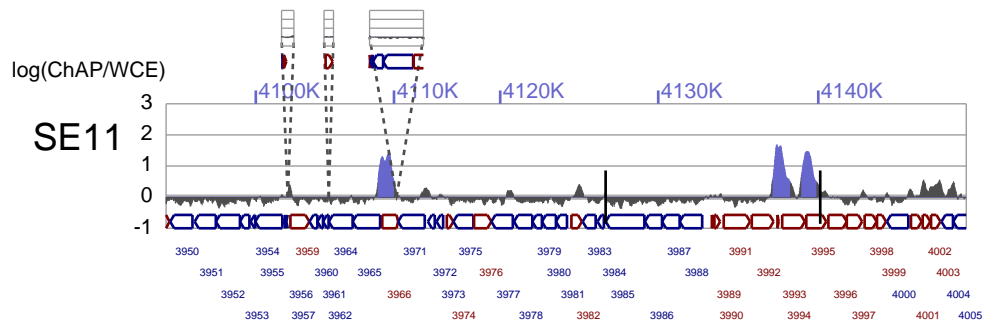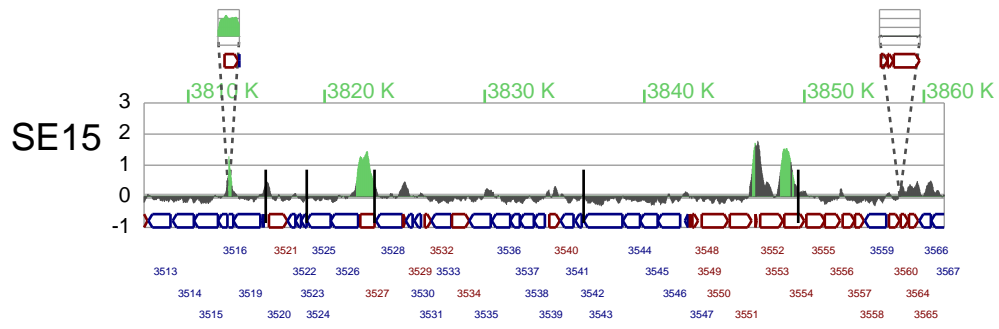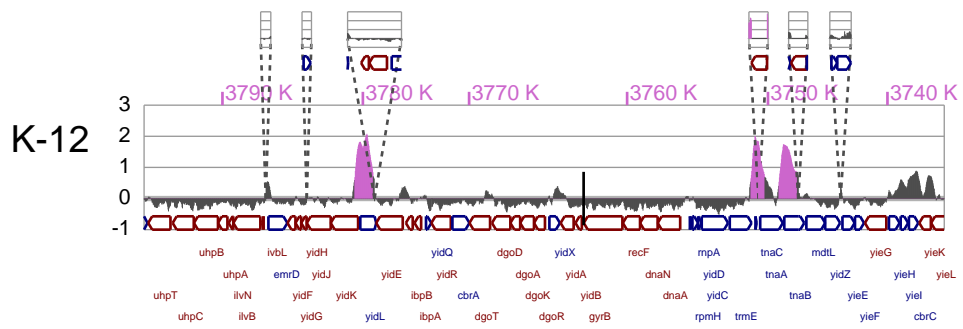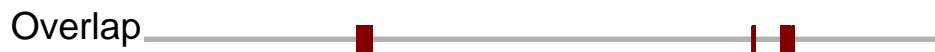

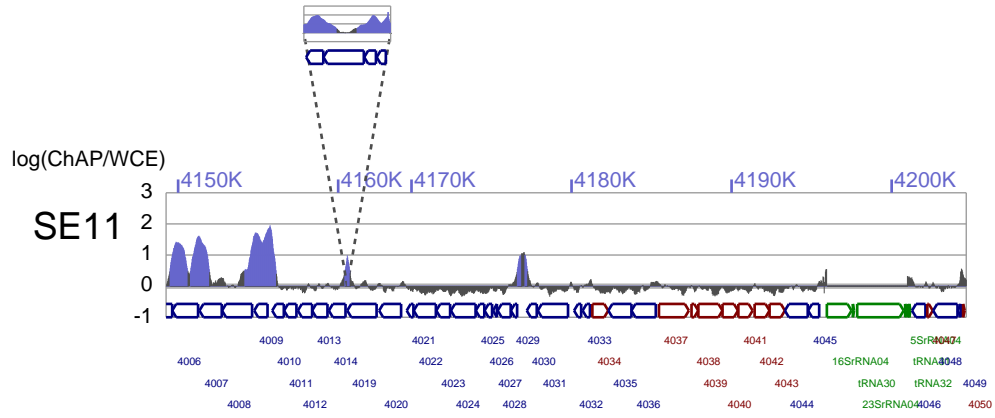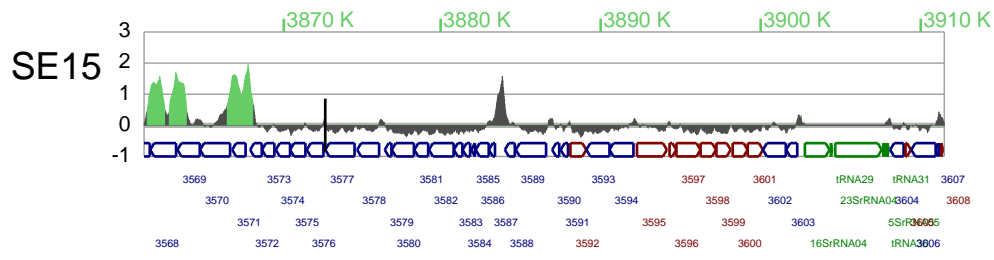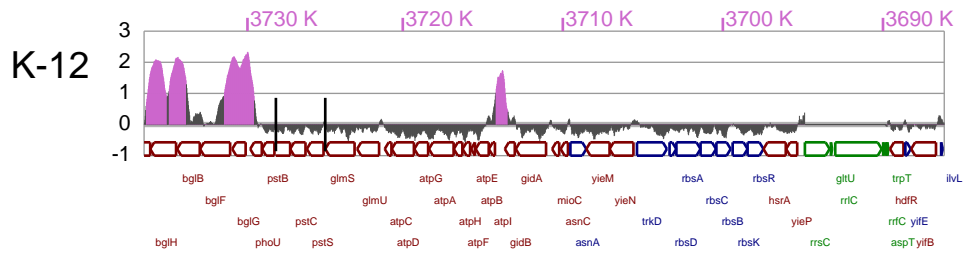

Overlap

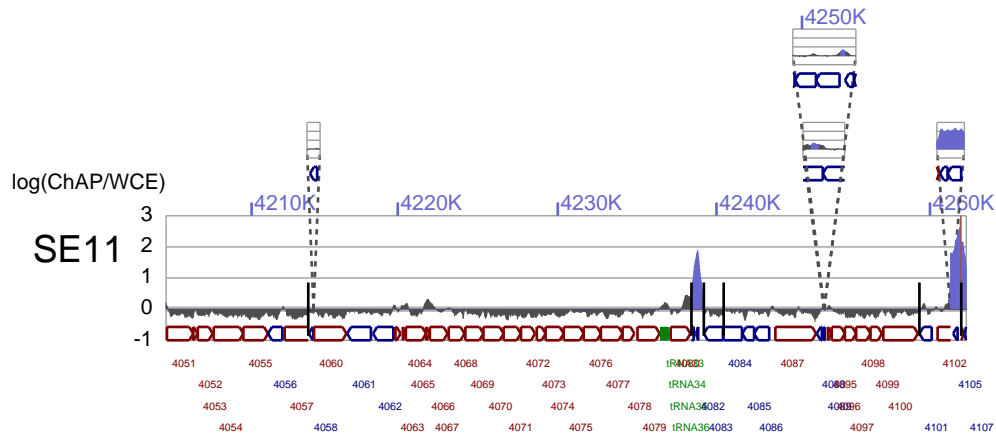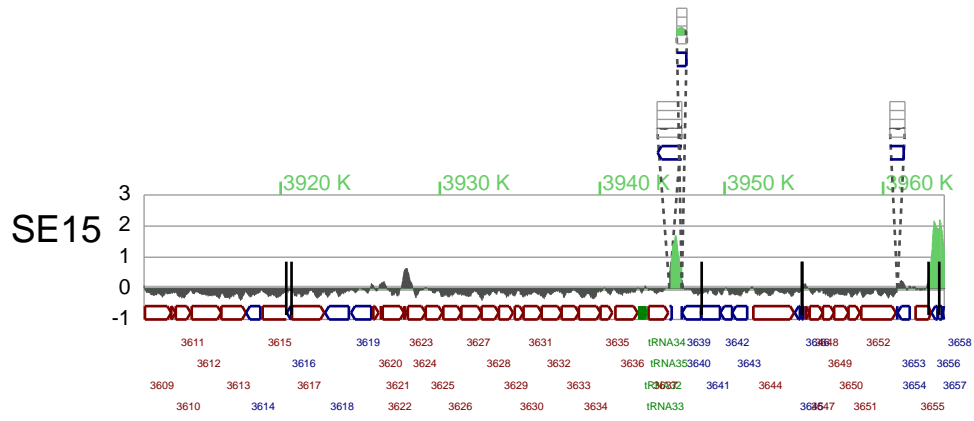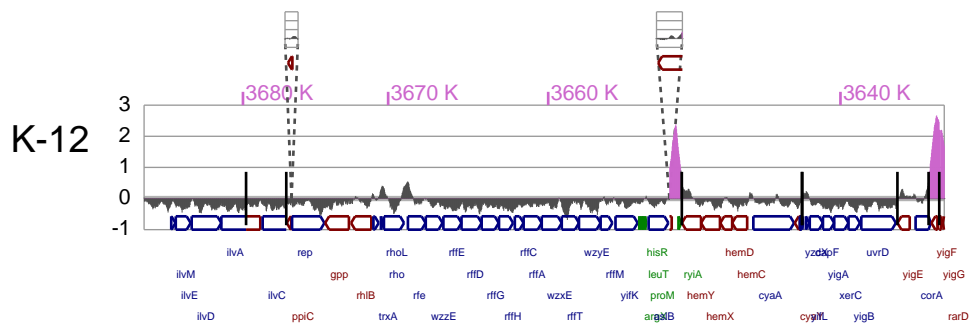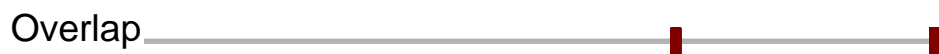

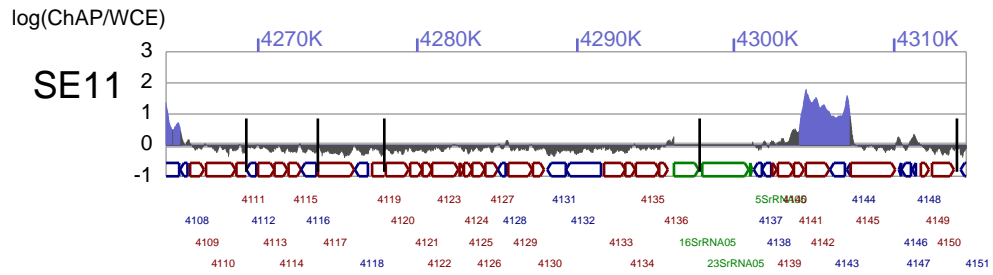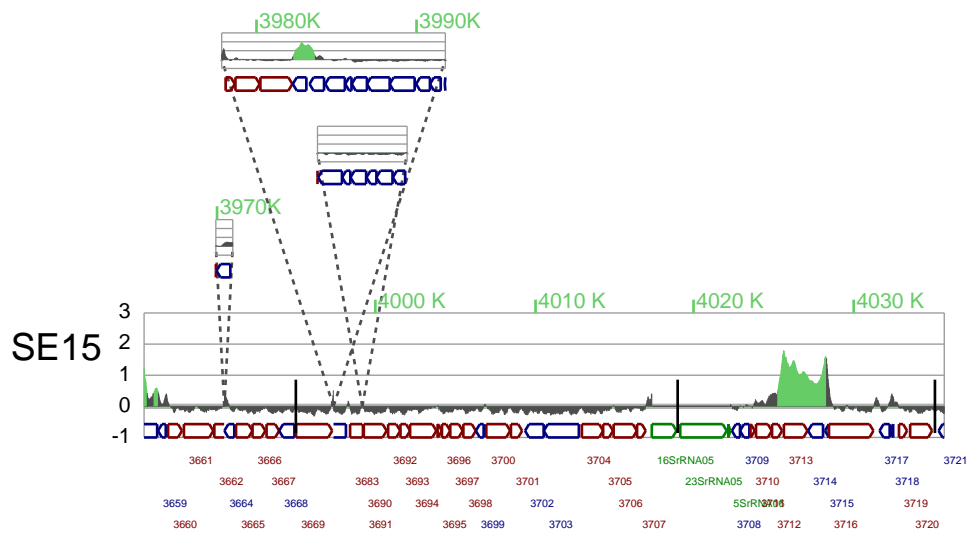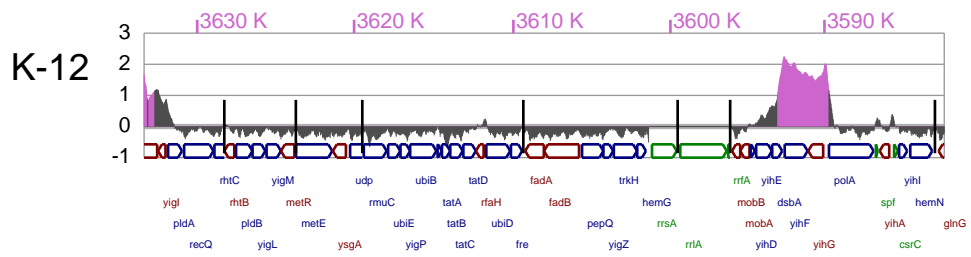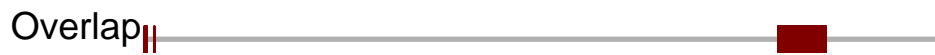

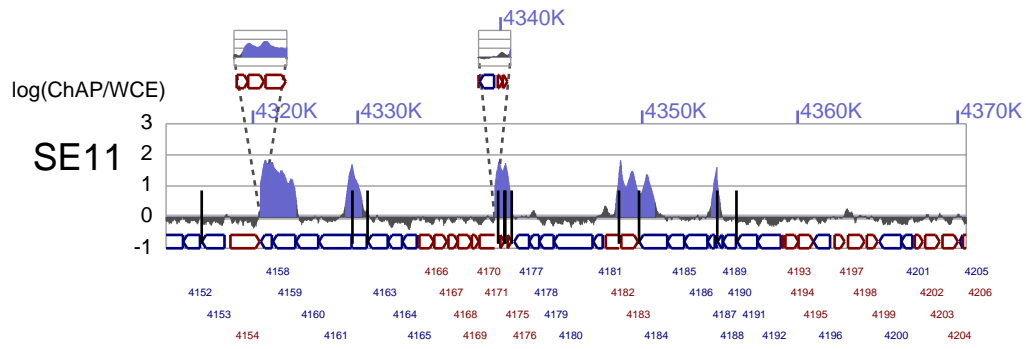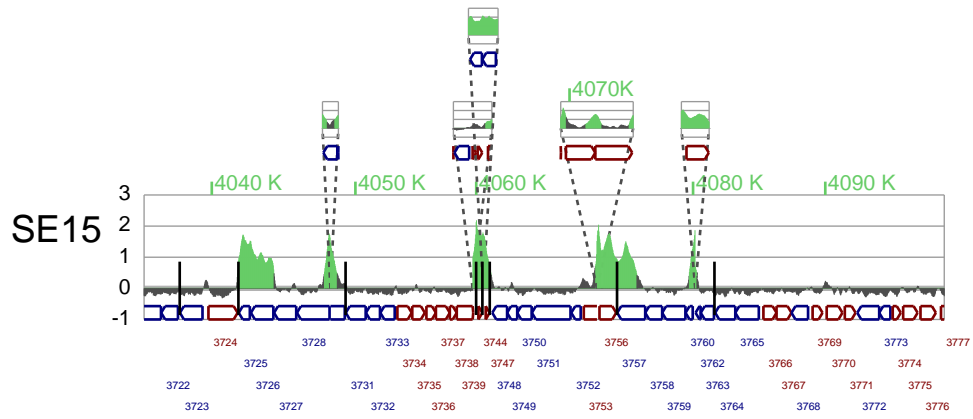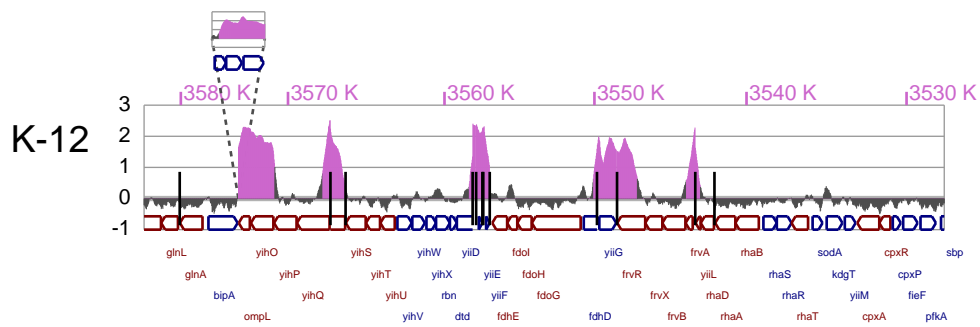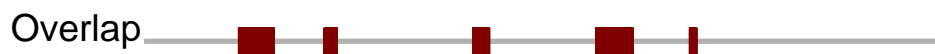

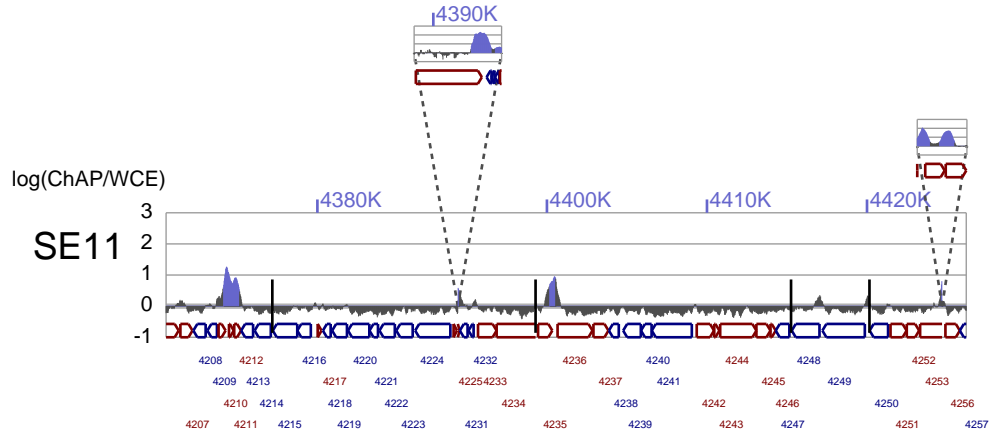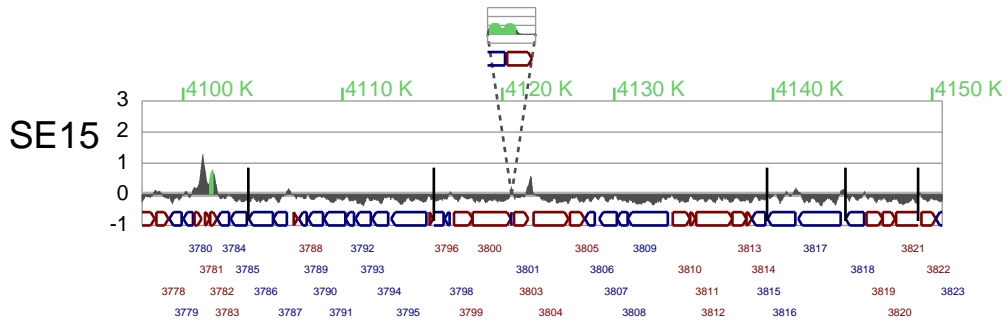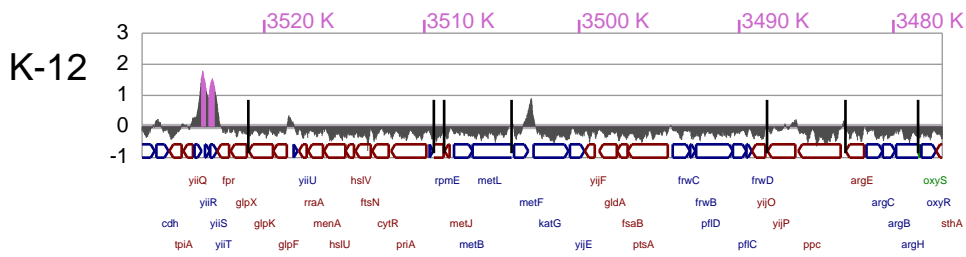

Overlap

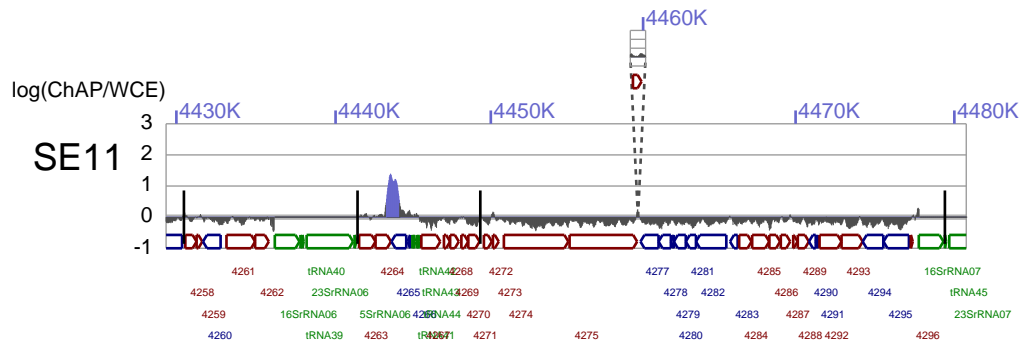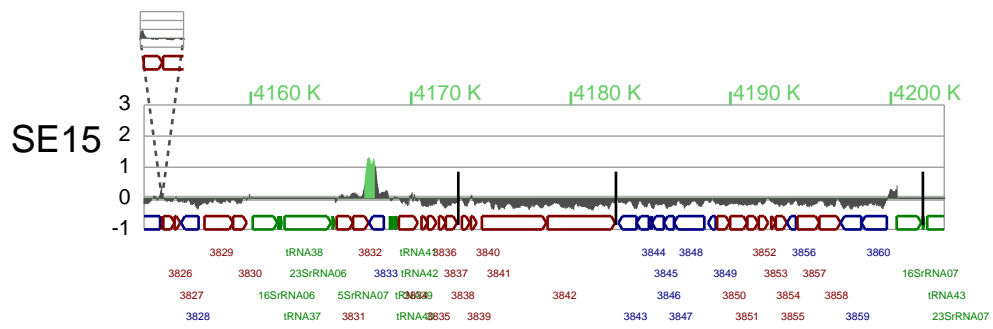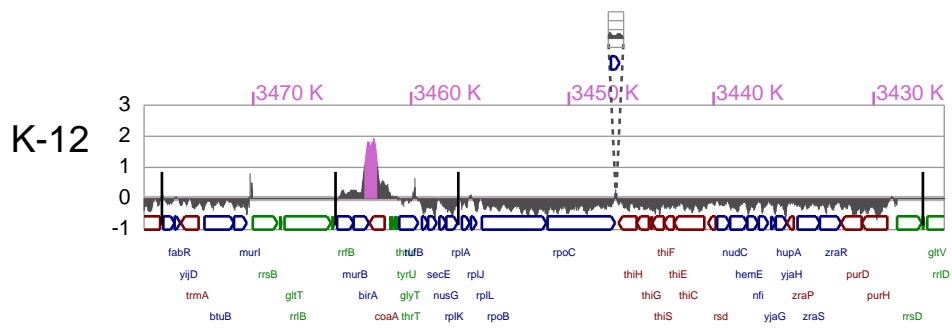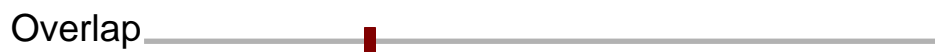

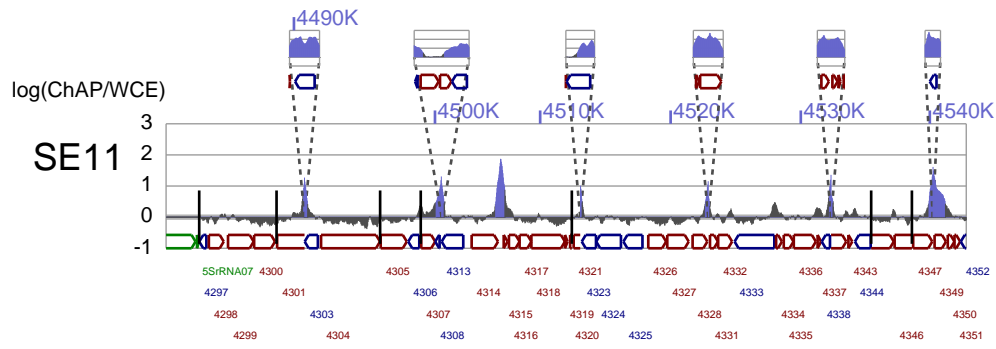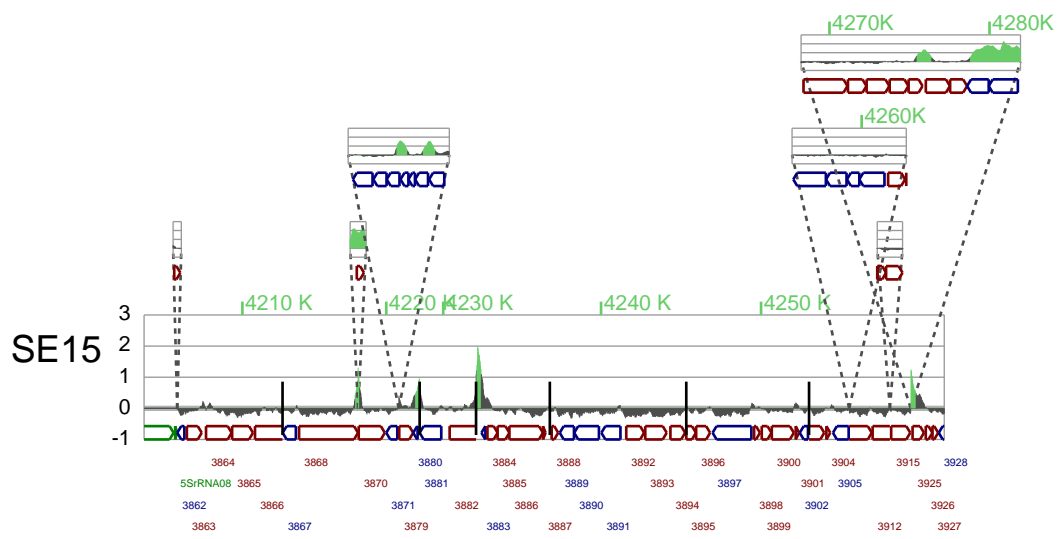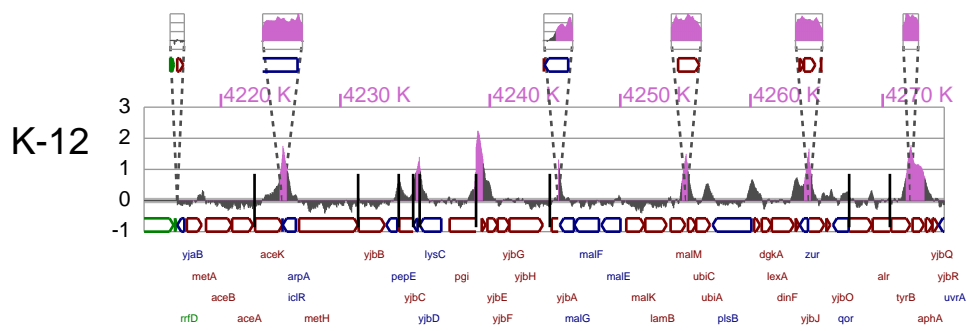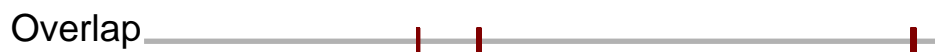



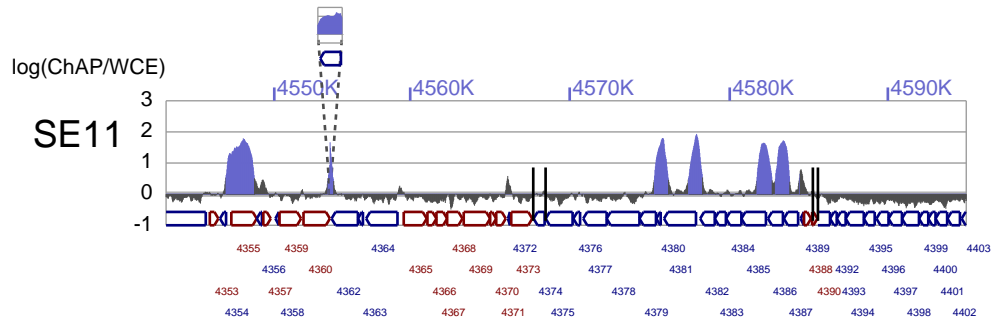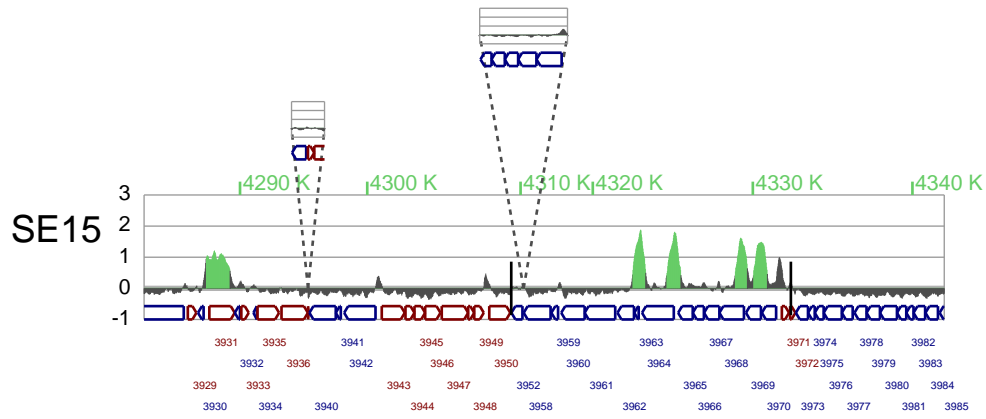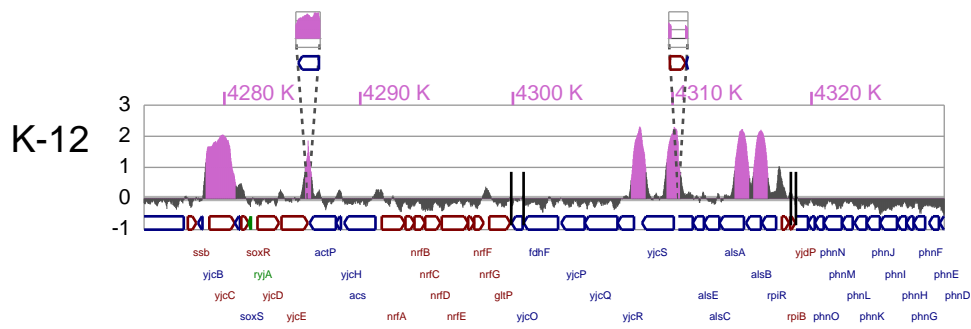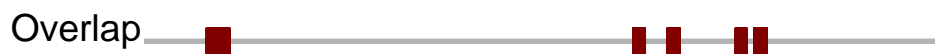

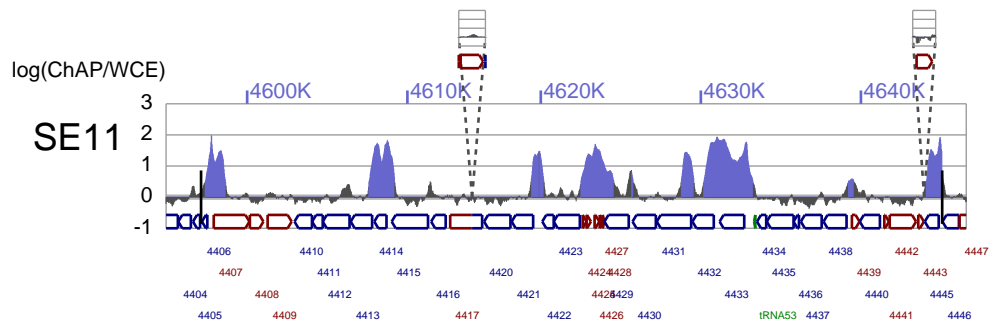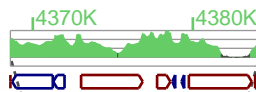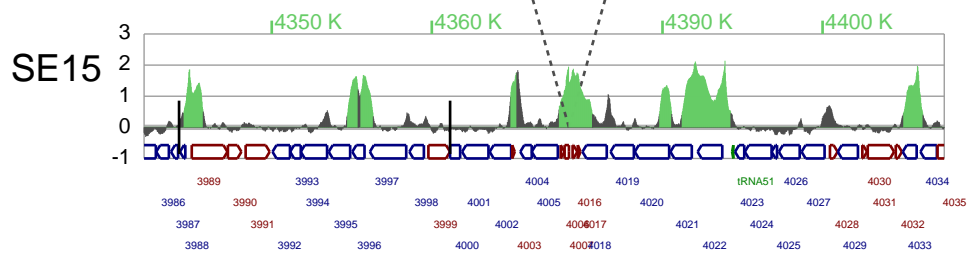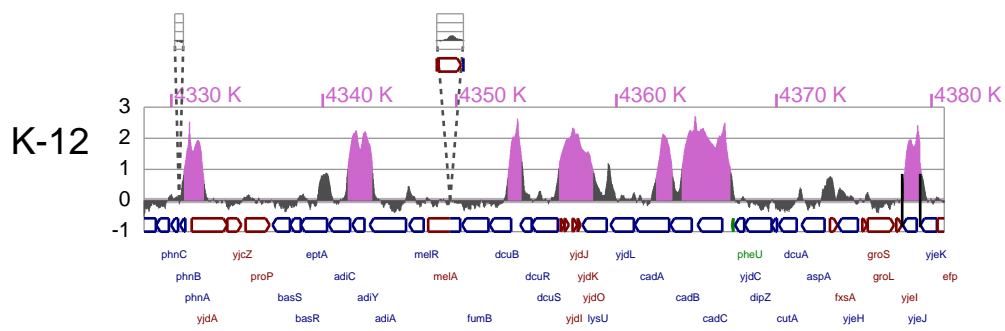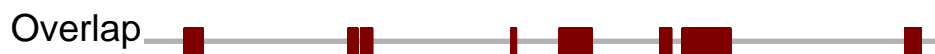

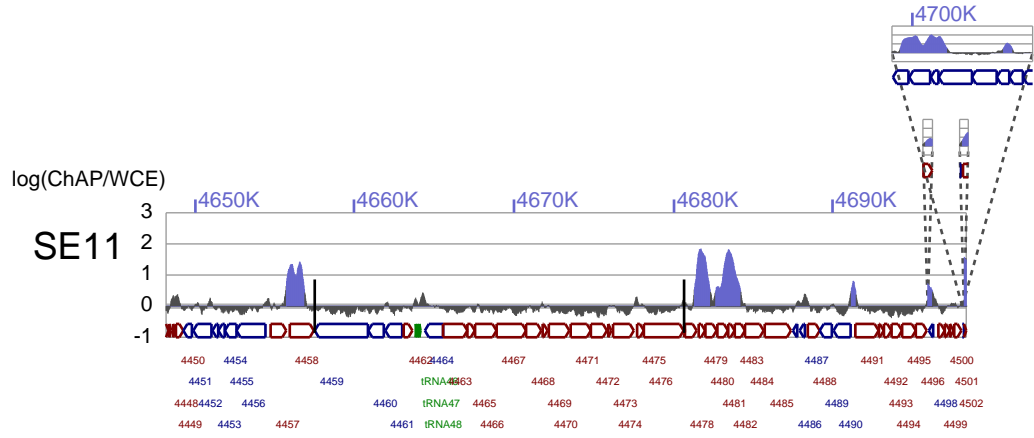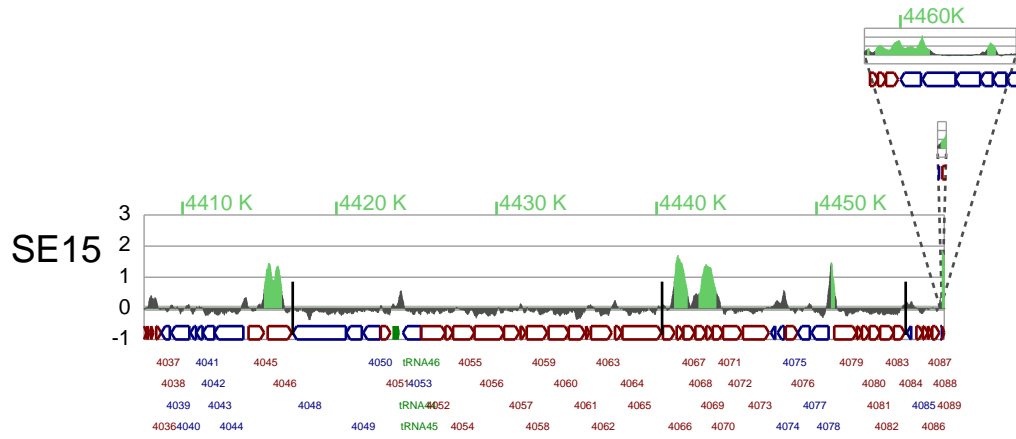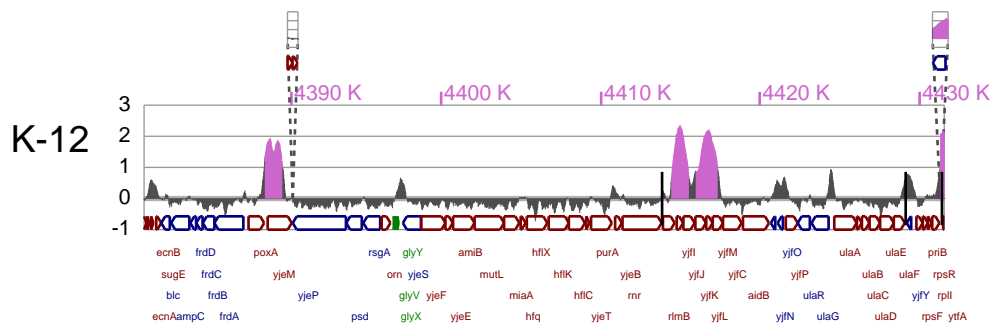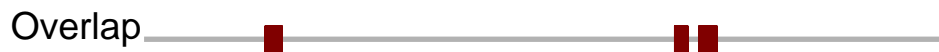

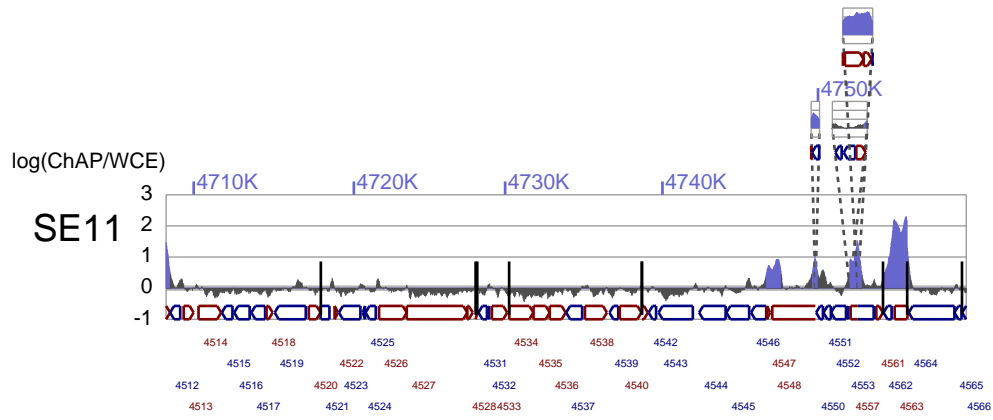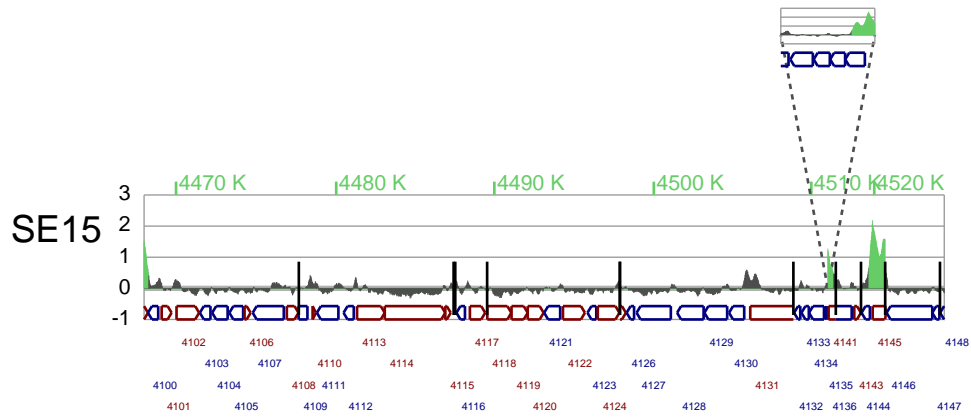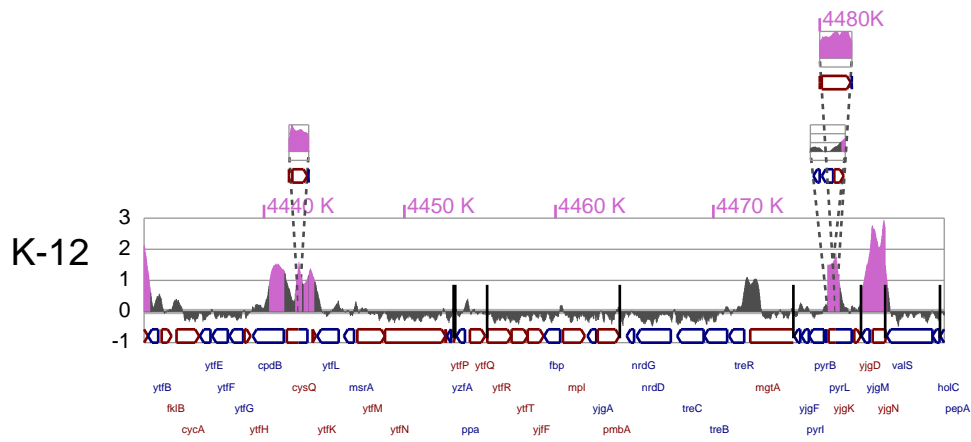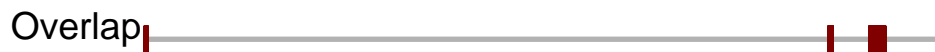

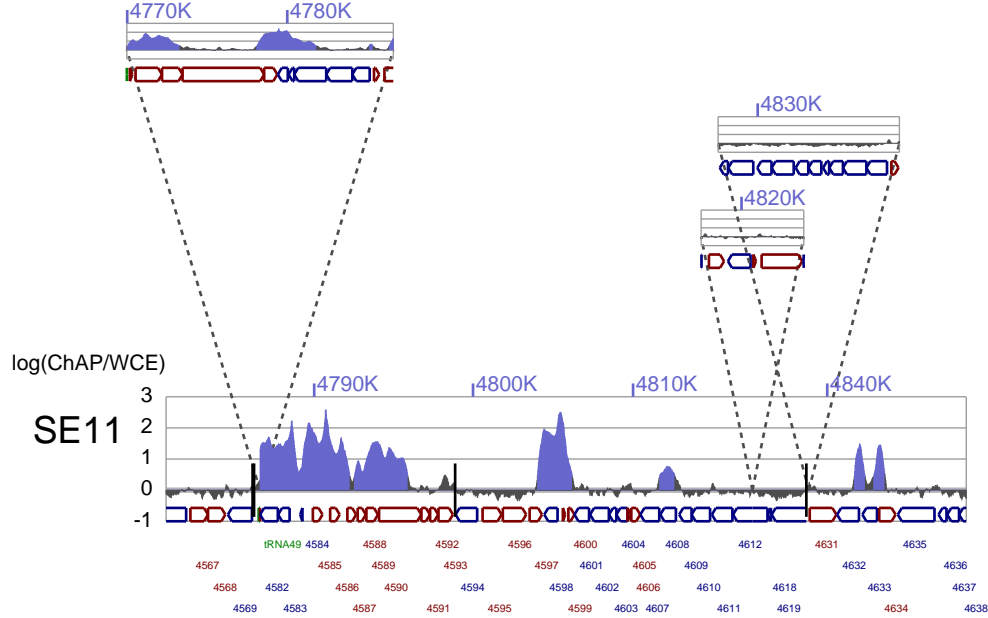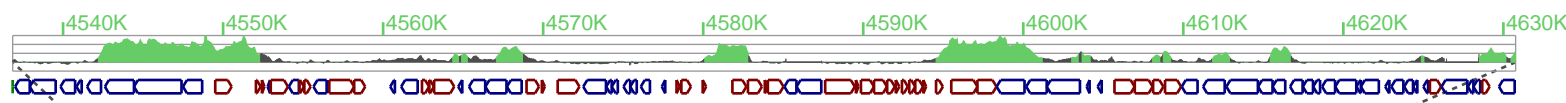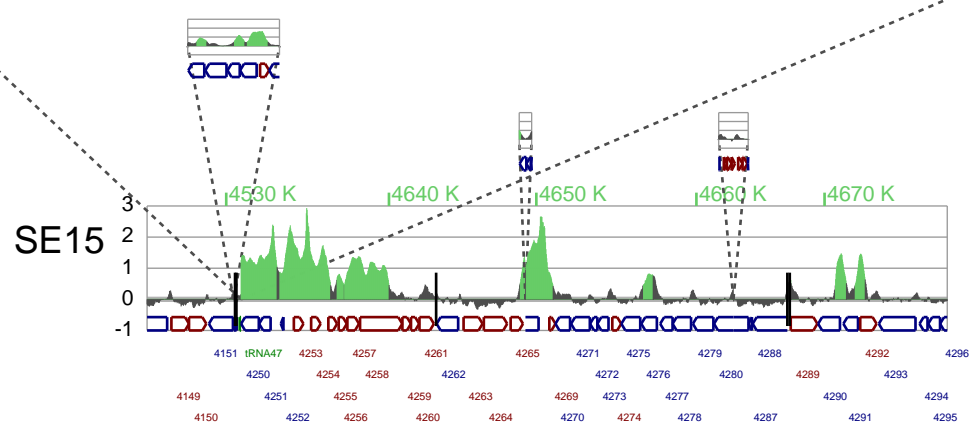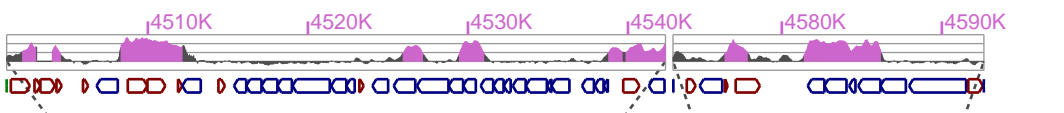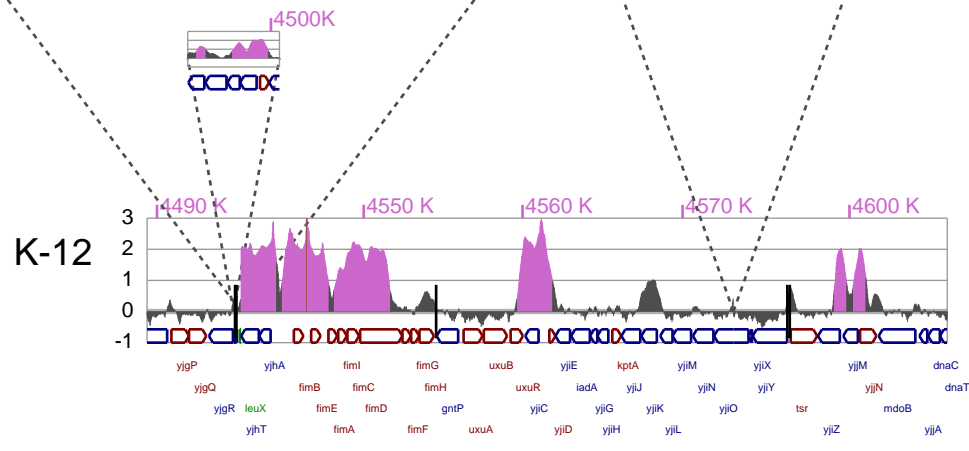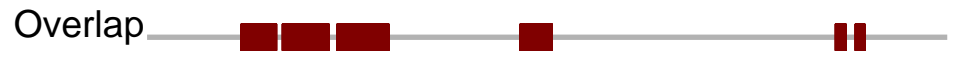

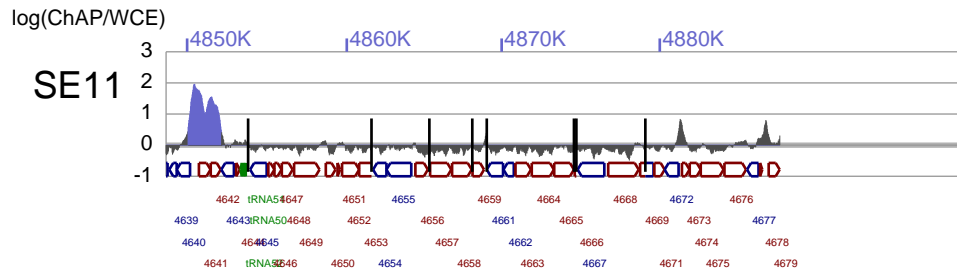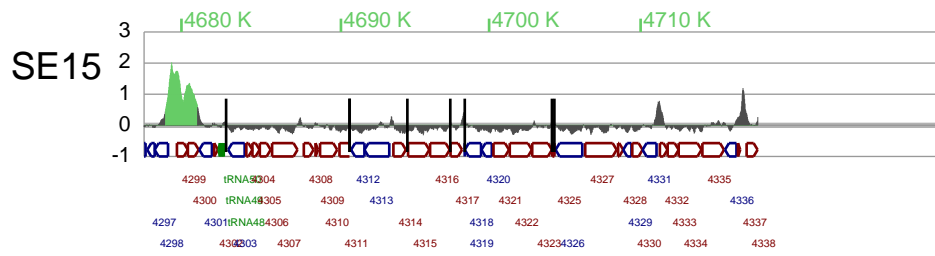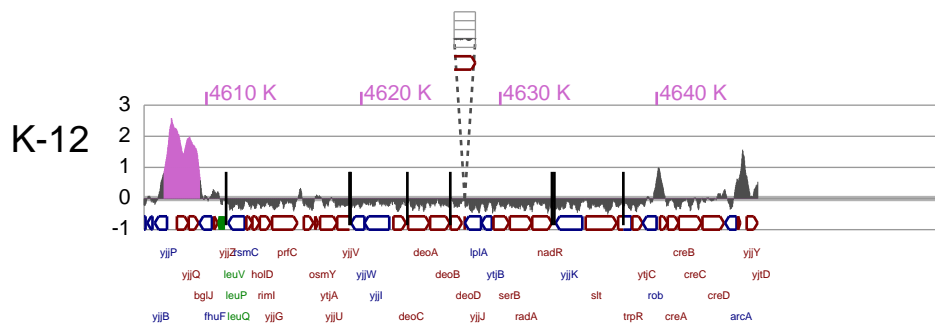

Overlap

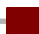

Supplement: pgen.1005796.s007.pdf [file pgen.1005796.s007.pdf]
