# Supplementary material for: H-NS Facilitates Sequence Diversification of Horizontally Transferred DNAs during Their Integration in Host Chromosomes
Source: PubMed Central journal article supplement (PMC4720273; doi:10.1371/journal.pgen.1005796), 2016-01-20

**A**

SE11

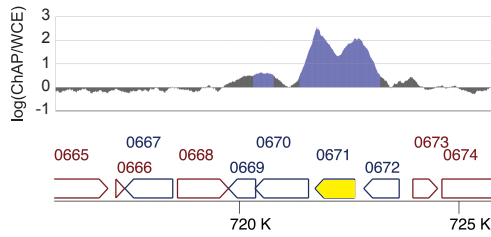

SE15

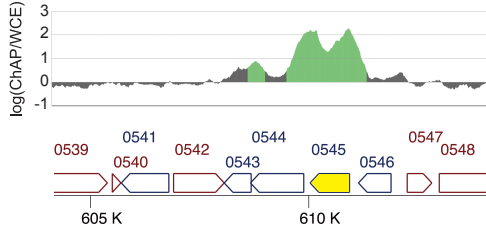

K12

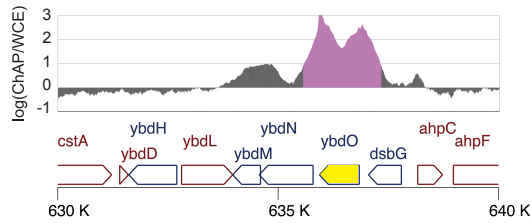

**B**

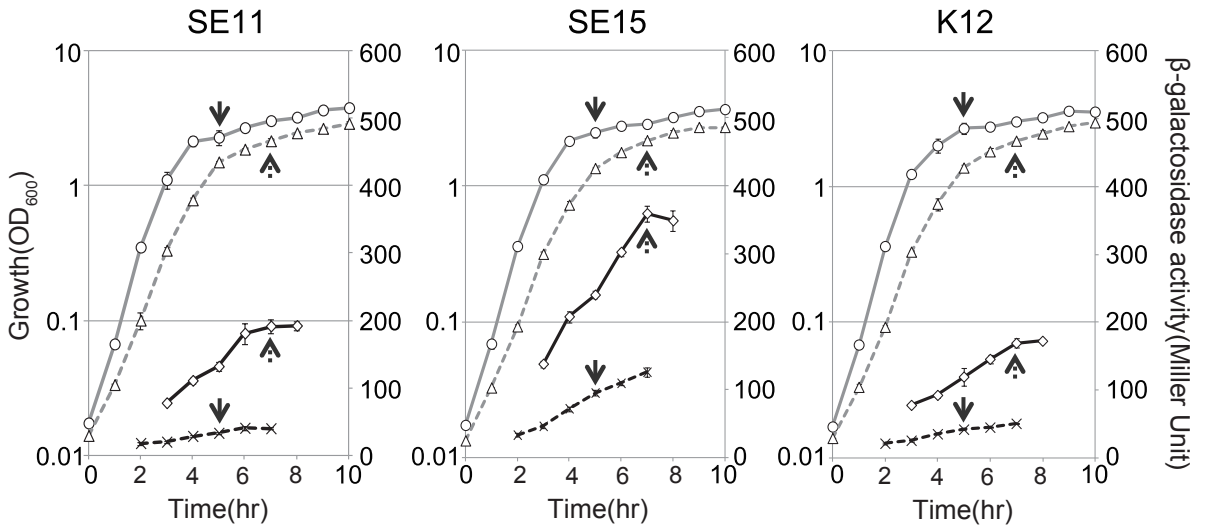

Supplement: pgen.1005796.s002.pdf [file pgen.1005796.s002.pdf]
