# Supplementary material for: H-NS Facilitates Sequence Diversification of Horizontally Transferred DNAs during Their Integration in Host Chromosomes
Source: PubMed Central journal article supplement (PMC4720273; doi:10.1371/journal.pgen.1005796), 2016-01-20
Supplement: pgen.1005796.s009.pdf [file pgen.1005796.s009.pdf]

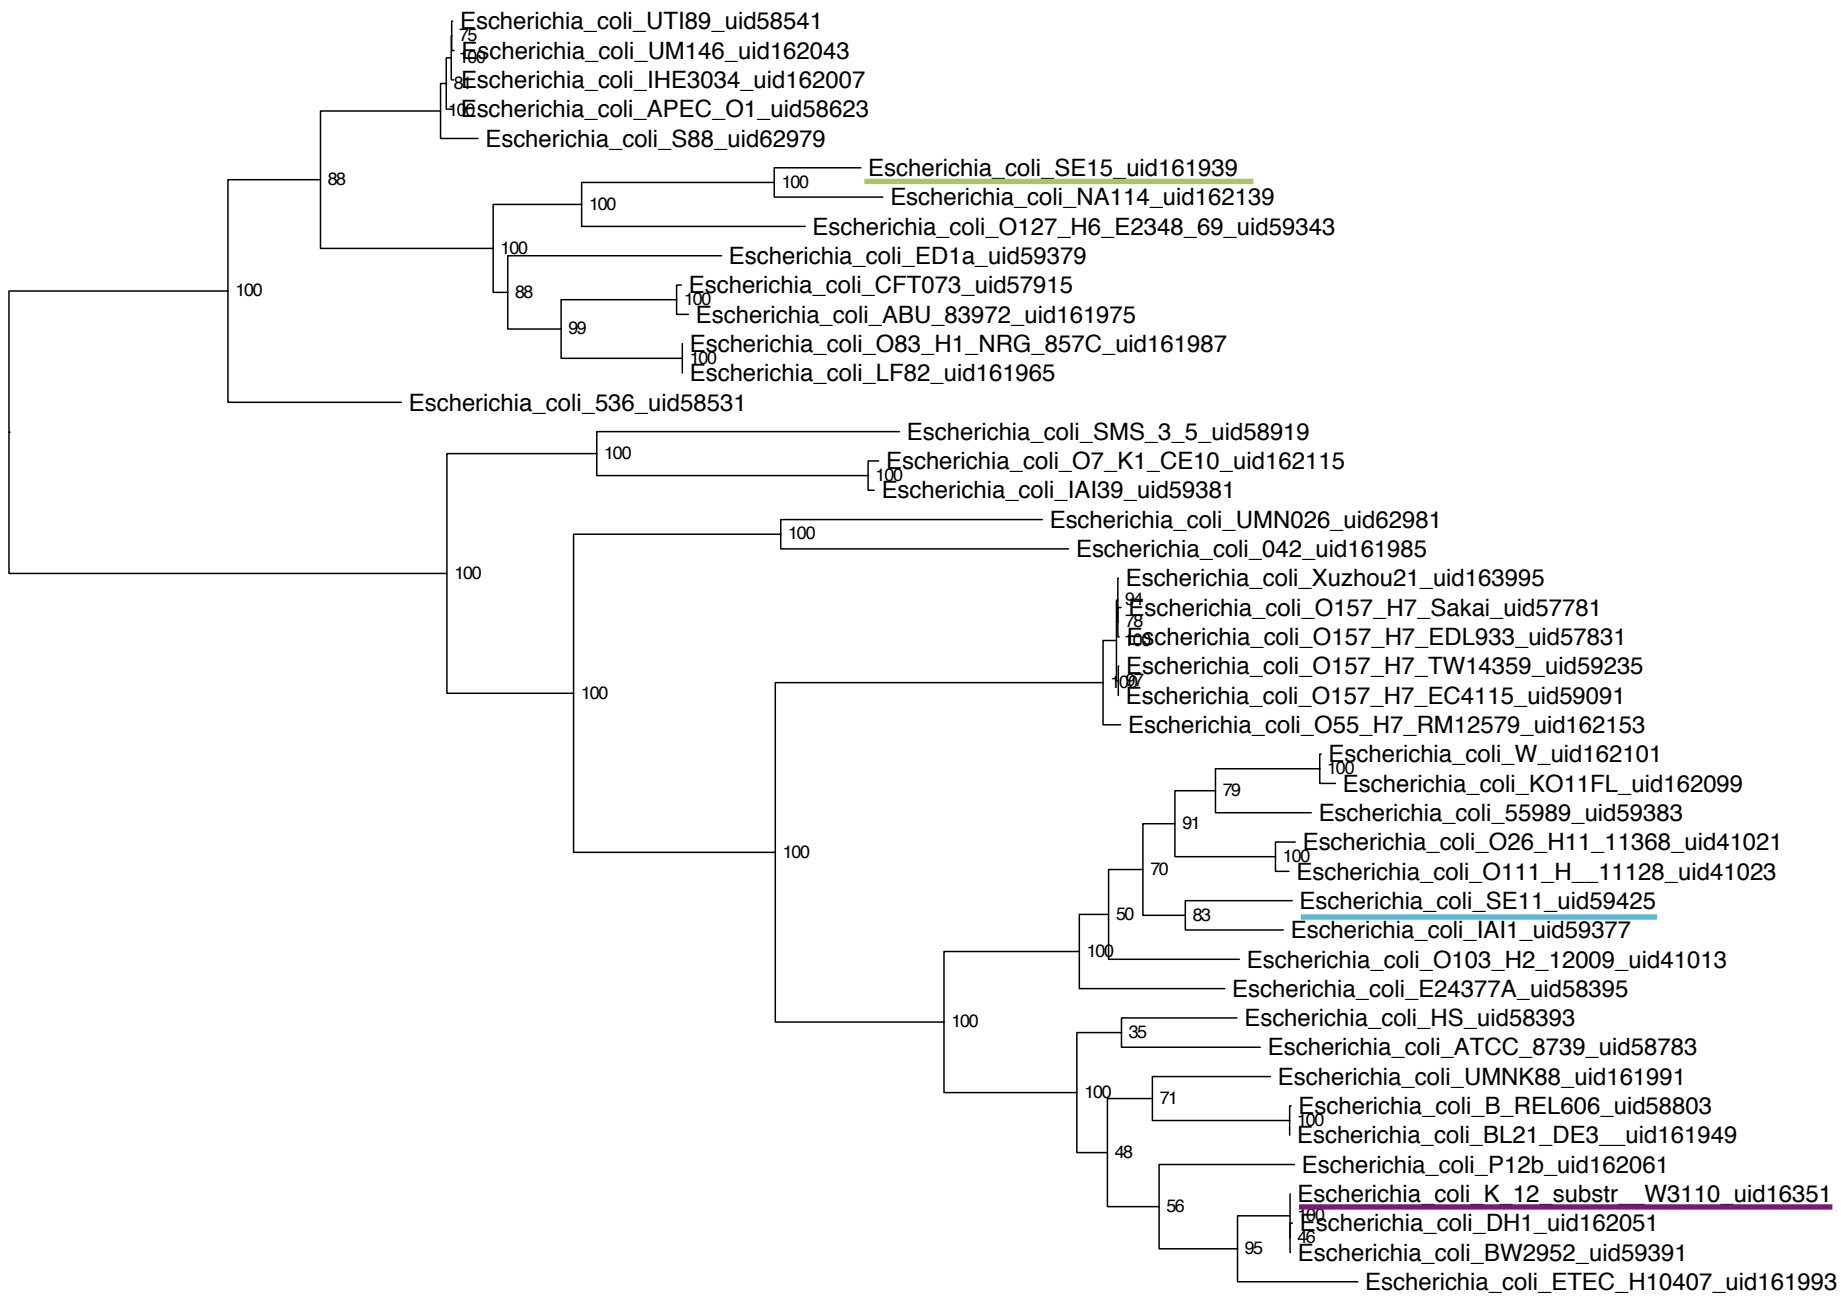

0.0050
