# Supplementary material for: H-NS Facilitates Sequence Diversification of Horizontally Transferred DNAs during Their Integration in Host Chromosomes
Source: PubMed Central journal article supplement (PMC4720273; doi:10.1371/journal.pgen.1005796), 2016-01-20

**A**

Non-synonymous

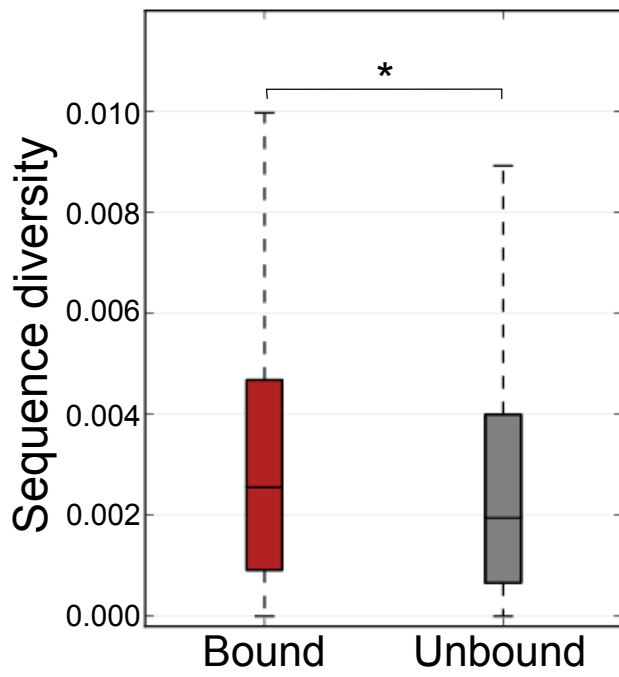**B**

Synonymous

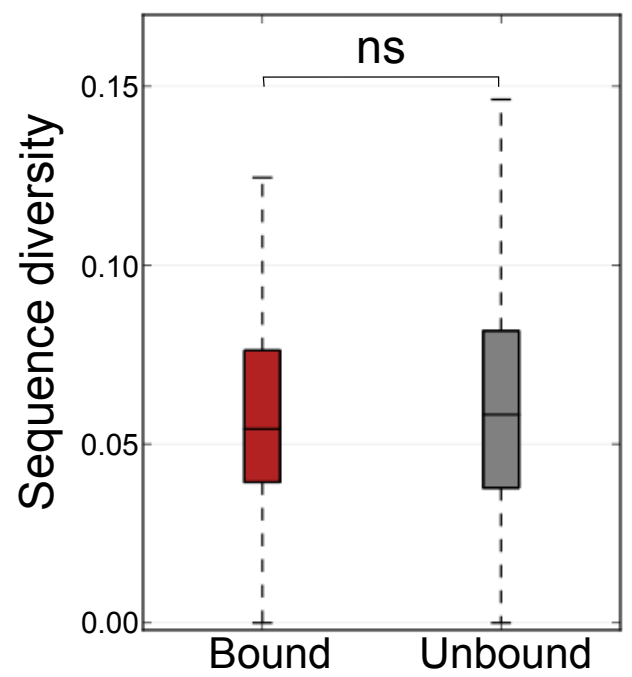**C**

Intergenic

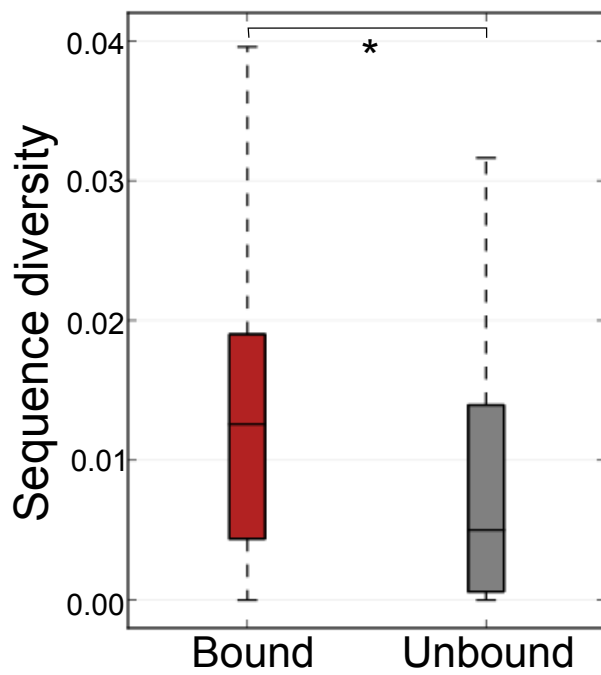

Supplement: pgen.1005796.s013.pdf [file pgen.1005796.s013.pdf]
