# Supplementary material for: H-NS Facilitates Sequence Diversification of Horizontally Transferred DNAs during Their Integration in Host Chromosomes
Source: PubMed Central journal article supplement (PMC4720273; doi:10.1371/journal.pgen.1005796), 2016-01-20
Supplement: pgen.1005796.s014.pdf [file pgen.1005796.s014.pdf]

H-NS-bound  
HGT-genes  
(N = 157)

H-NS-unbound  
HGT-genes  
(N = 224)

H-NS-bound  
Core-genes  
(N = 174)

H-NS-unbound  
Core-genes  
(N = 1543)

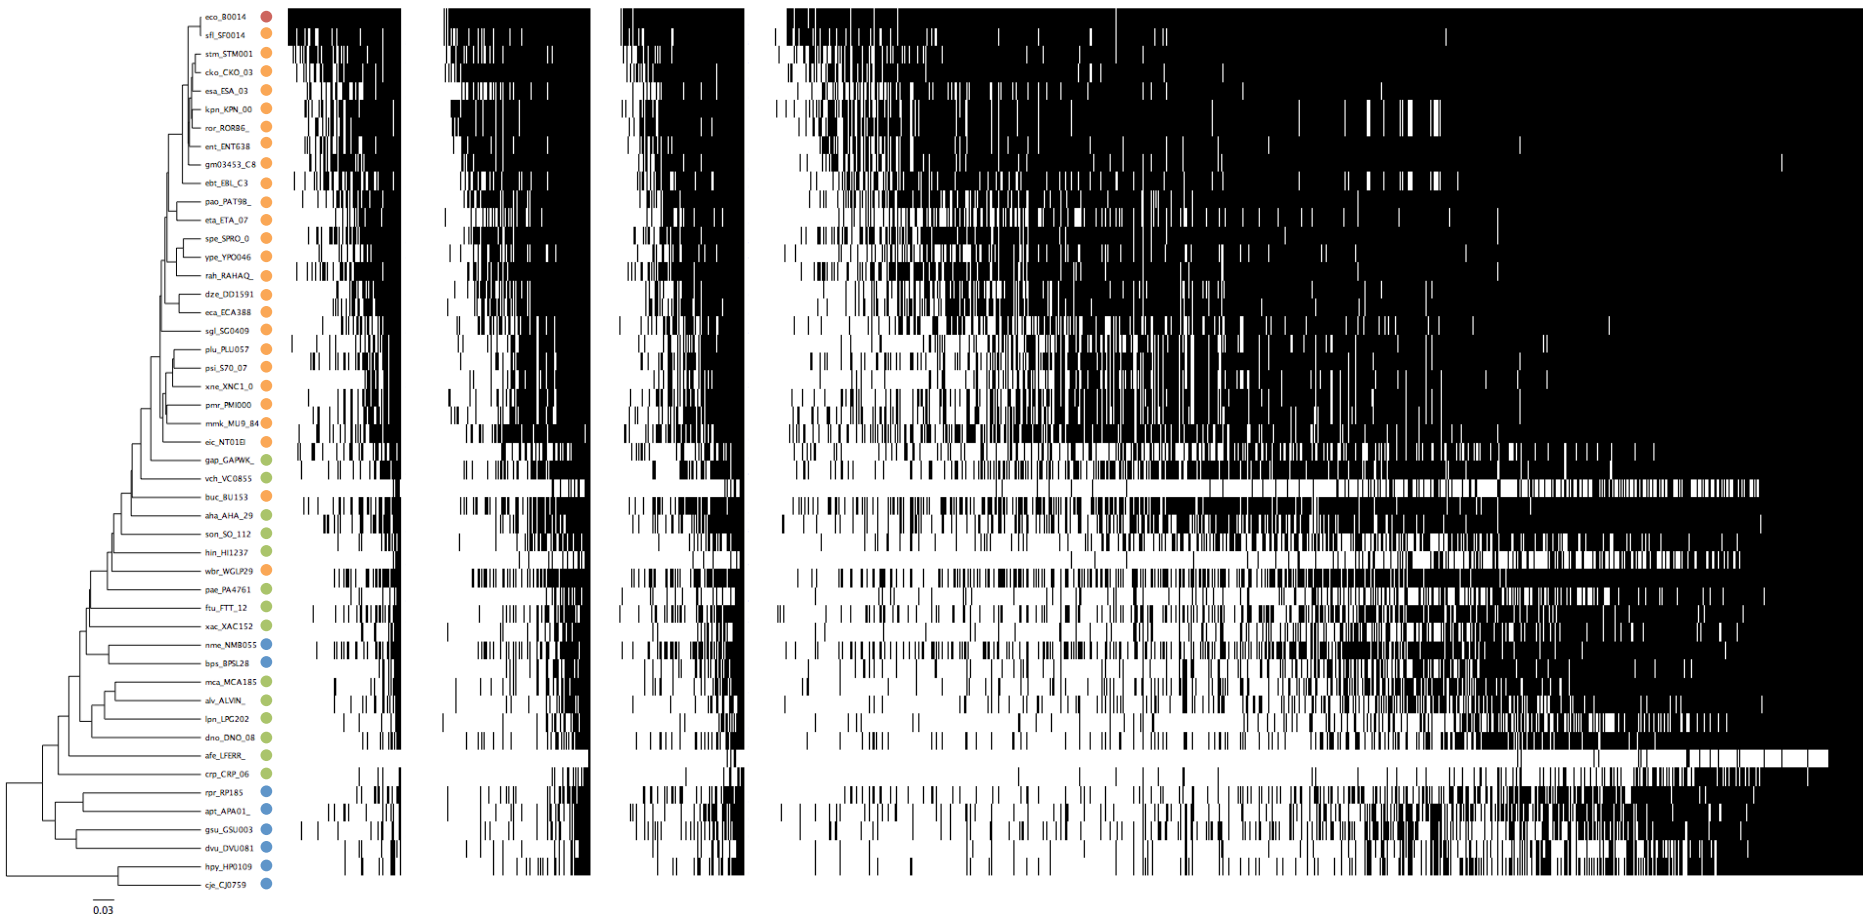

Red circle: *E. coli*

Orange circle: Same family as *E. coli* (Enterobacteriaceae)

Green circle: Same class as *E. coli* (Gammaproteobacteria)

Blue circle: Same phylum as *E. coli* (Proteobacteria)

Black square: Presence

White square: Absence
